# Supplementary material for: Analysis of the diversity of the glycoside hydrolase family 130 in mammal gut microbiomes reveals a novel mannoside-phosphorylase function
Source: PubMed Central journal article supplement — Microb Genom. 2020 Jul 15;6(10):mgen000404. doi: 10.1099/mgen.0.000404 (PMC7660257; doi:10.1099/mgen.0.000404), 2020-07-15
Supplement: mgen-6-404-s001.pdf [file mgen-6-404-s001.pdf]

## Supplementary Figures and Tables

|                               |     |
|-------------------------------|-----|
| <b>Figure S1</b> .....        | 2   |
| <b>Figure S2</b> .....        | 5   |
| <b>Figure S3</b> .....        | 7   |
| <b>Figure S4</b> .....        | 8   |
| <b>Figure S5</b> .....        | 9   |
| <b>Figure S6</b> .....        | 10  |
| <b>Table S1</b> .....         | 11  |
| <b>C1</b> .....               | 11  |
| <b>C2</b> .....               | 56  |
| <b>C3</b> .....               | 96  |
| <b>C4</b> .....               | 105 |
| <b>C5</b> .....               | 114 |
| <b>C6</b> .....               | 118 |
| <b>UC1</b> .....              | 120 |
| <b>UC2</b> .....              | 125 |
| <b>UC3</b> .....              | 130 |
| <b>UC4</b> .....              | 134 |
| <b>UC5</b> .....              | 136 |
| <b>UC6</b> .....              | 138 |
| <b>UC7</b> .....              | 139 |
| <b>UC8</b> .....              | 139 |
| <b>UC9</b> .....              | 140 |
| <b>Small meta-nodes</b> ..... | 141 |
| <b>Singletons</b> .....       | 144 |
| <b>Table S2</b> .....         | 161 |
| <b>Table S3</b> .....         | 162 |
| <b>Table S4</b> .....         | 163 |

Figure S1

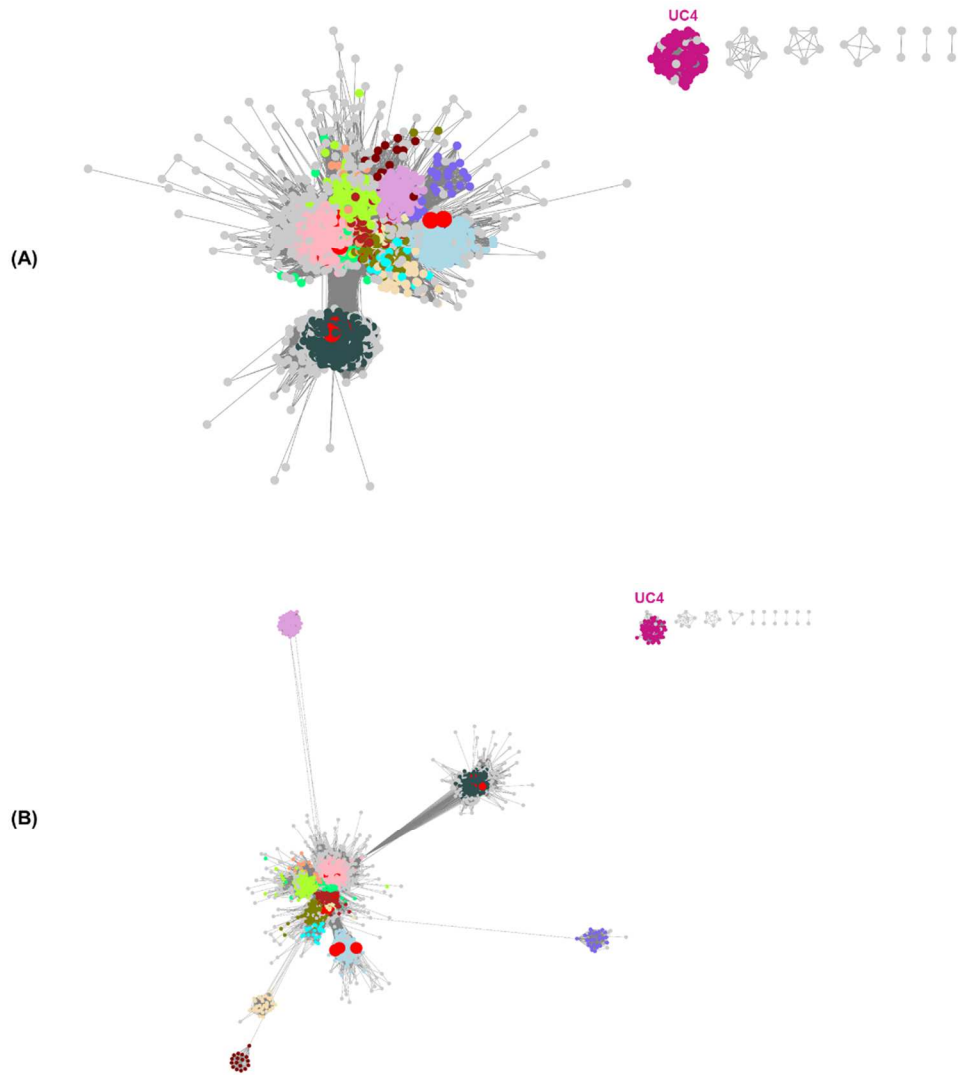

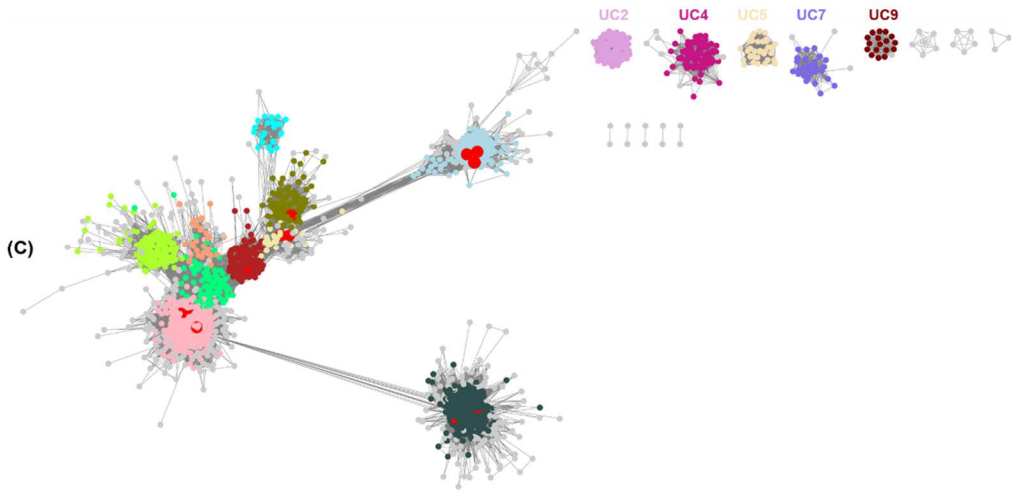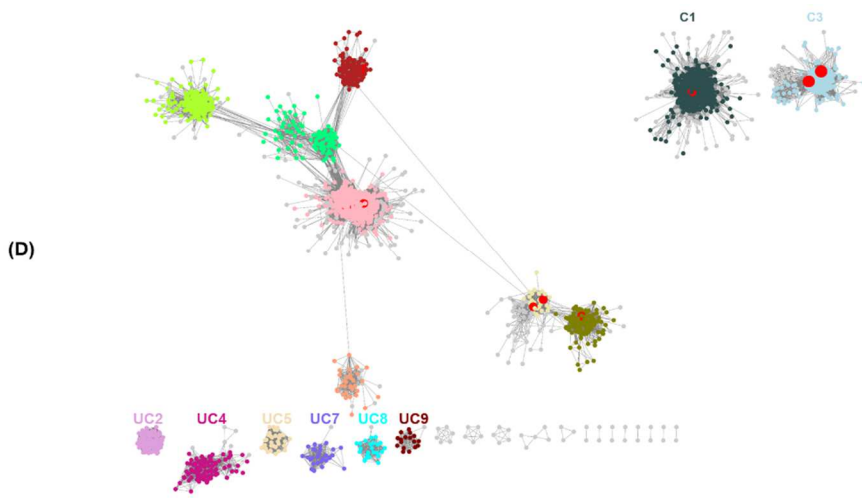

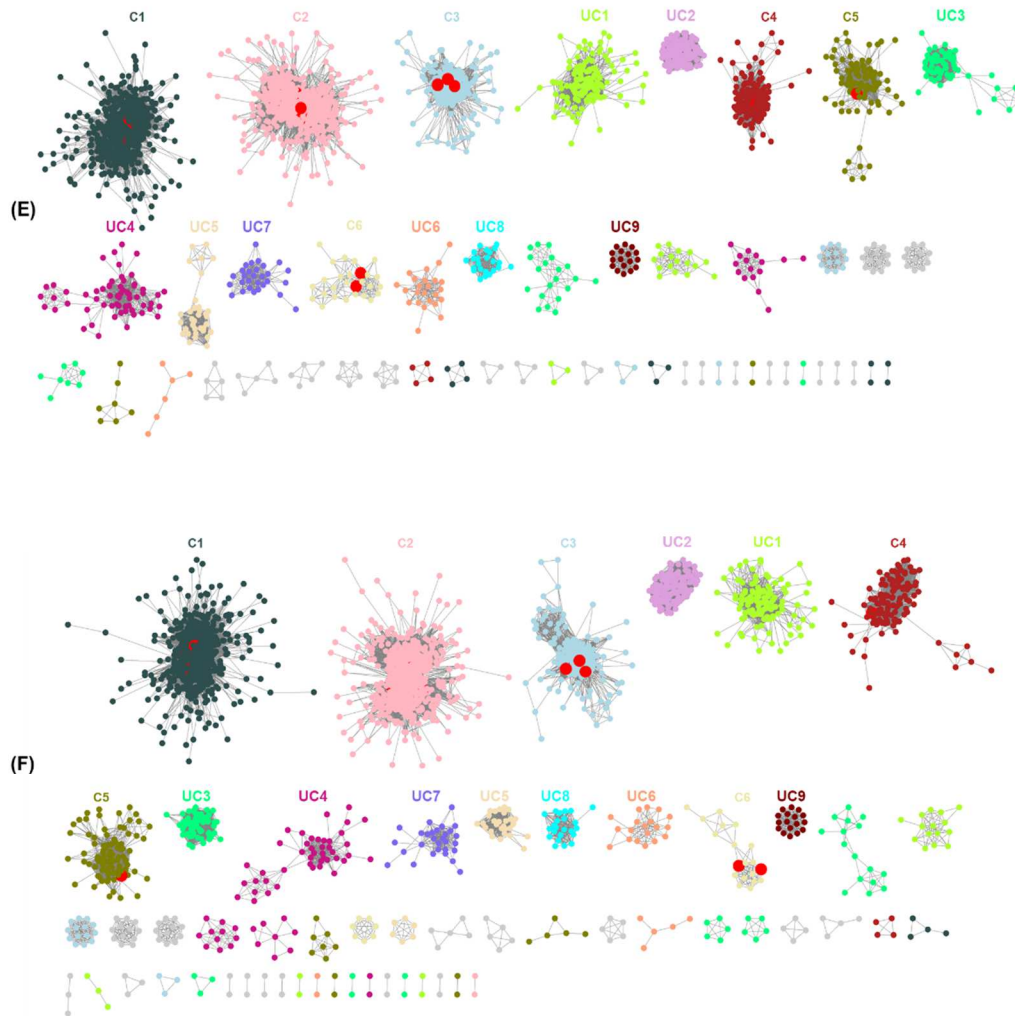

**Figure S1:** Protein sequence similarity networks (SSNs) of the 6,308 GH130 sequences from the CAZy database and from gut metagenomes, with various E-value thresholds. The 3,637 nodes contain sequences with more than 70% identity. Red nodes correspond to biochemically characterized members of the GH130 family. Other nodes are colored according to the meta-node they belong to in the optimal SSN, obtained with the E-value threshold  $10^{-70}$ . (A), E-value threshold  $10^{-30}$ , corresponding to 32% sequence identity; the 79 sequences appearing in 78 singletons have been omitted from the figure. (B), E-value threshold  $10^{-40}$ , corresponding to 41% sequence identity; the 189 sequences appearing in 177 singletons have been omitted from the figure. (C), E-value threshold  $10^{-50}$ , corresponding to 53% sequence identity; the 333 sequences appearing in 315 singletons have been omitted from the figure. (D), E-value threshold  $10^{-60}$ , corresponding to 61% sequence identity; the 491 sequences appearing in 457 singletons have been omitted from the figure. (E), E-value threshold  $10^{-80}$ , corresponding to 64% sequence identity; the 896 sequences appearing in 826 singletons have been omitted from the figure. (F), E-value threshold  $10^{-90}$ , corresponding to 65% sequence identity; the 1130 sequences appearing in 1027 singletons have been omitted from the figure.

Figure S2

|                                                        |                                                       | +1 Subsite                                              |                                                                 |
|--------------------------------------------------------|-------------------------------------------------------|---------------------------------------------------------|-----------------------------------------------------------------|
|                                                        |                                                       | ↓                                                       |                                                                 |
| GHs $_{\beta}$ -1,2-Man $_n$                           | C3                                                    | ACT94389.1-Dfer_3176-C3                                 | GVPVPSVSDSTTRFFCFPMKREVWESNDTFNPAATMKN---GKIVLVLYAEDKAGK--- 93  |
|                                                        |                                                       | ALJ48509.1-BACOVA_03624-C3                              | NVNPVISPIENTKFCYFLTKDSIAWESNDTFNPAATLYN---GEIVLVLYAEDKSGV--- 99 |
|                                                        |                                                       | AAO78885.1-BT3780-C3                                    | GANPVISPIENTKFCYFMTQDYVAWESNDTFNPAATLHD---GKIVLVLYAEDKSGV--- 96 |
| GPs $_{\beta}$ -1,2-Man $_n$                           | C4                                                    | CAC96089.1-Lin0857-C4                                   | EENPLITFLDVK-----PIHEGFEVIGAFNGGVAEYN---GEVLLLRVAEKPVSEDP 56    |
|                                                        |                                                       | ABY93074.1-Teth514_1789-C6                              | SNKPILSPKEH-----EWEKEAVFNAAVIYEG---NKPHLFYFASNNKF---- 49        |
| GPs $_{\beta}$ -1,2-Man $_n$                           | C6                                                    | ABY93073.1-Teth514_1788-C6                              | SKPVLMKPAEN-----EWEAAVFNAAIYDN---GLPHLIYFATDIGP---- 49          |
|                                                        |                                                       | CAZ94304.1-Zobellia_231-C5                              | FNNPILKPHPTN-----YWENLVVNCVGFEN---GKTMFLYFAAGDD---- 47          |
| GPs $_{\beta}$ -1,3-Man $_n$                           | UC7                                                   | 340101.Vvad_PD3074-U7-UC7                               | EKRCILSPVPGS-----FWAGKMLNFMADIADPEKIHMLFRATGFQFQAR-- 52         |
|                                                        |                                                       | VCV21228.1-RIL182_01099-C1                              | DLNPETNPFYME-----RLGINAVMNSGAIELN---GKYLVARIEG----- 89          |
| GPs $_{\beta}$ -1,4-Man-Glc                            | C1                                                    | ADU21379.1-RAMP1-C1                                     | DLNKEETNPFQE-----RLGINAVFNAGAIKLN---DRYCLVARVEG----- 89         |
|                                                        |                                                       | CAH06518.1-BF0772-C1                                    | DLNEETNPFLE-----RIGMNATLNAGAIKWD---GKYLMLVRVEG----- 91          |
|                                                        |                                                       | AAS19693.1-Unk1-C1                                      | DLNEKTNPHLME-----RQGINAAFNAGAMYWN---GKYLVARVEG----- 91          |
| GPs $_{\beta}$ -1,4-Man $_n$ / $\beta$ -1,4-Man-GlcNAc | UC3                                                   | MH0373_GL0093988-U3-UC3                                 | ENNPILKPELMP-----APCCAVYNSGVVKT---DDGEYIMMSRFEZ----- 49         |
|                                                        |                                                       | VCV21229.1-RIL182_01100-C2                              | NENPIIGRNVPK-----GV-ARIFNSAVMPYE---DGFVGVFRGEQ----- 68          |
| GPs $_{\beta}$ -1,4-Man $_n$ / $\beta$ -1,4-Man-GlcNAc | C2                                                    | AAD36300.1-TM1225-C2                                    | SNKPIIGRNVPV-----KG-ARVFN SAVVFN---GEFVGVFRIDH----- 64          |
|                                                        |                                                       | AAO76140.1-BT1033-C2                                    | SQNPVIGRYHIP-----SS-NSIFNSAVVFEK---DGFAGVFRCDN----- 59          |
|                                                        |                                                       | ADD61463.1-Uhgb_MP-C2                                   | VANPIIPRDLIP-----TS-NSIFNSAVVFG---DGFAGVFRCDN----- 62           |
|                                                        |                                                       | ADU20661.1-RAMP2-C2                                     | DANPIIPRDLIP-----TS-NSIFNSAVVFESEKGFAGVFRVDD----- 70            |
|                                                        |                                                       | WF_026485574.1-CalpoDRAFT_0075-C2                       | QQNPVIPRDLIP-----SS-NSIFNSAVVFN---GEFAGVFRCDT----- 67           |
| WF_026486530.1-CalpoDRAFT_1209-C2                      | QQNPVIPRDLIP-----SS-NSIFNSAVVFN---GEFAGVFRCDT----- 67 |                                                         |                                                                 |
| GPs $_{\beta}$ -1,4-Man-GlcA UC1                       | MH0431_GL0150624-U1-UC1                               | ENNPVLSADLS-----YPSLNVFNAGVAKYR---NQYVMVFNVDVGFAPD-- 49 |                                                                 |

---

|                                                        |                                                         | +1 Subsite Proton donor                            |                                                                |
|--------------------------------------------------------|---------------------------------------------------------|----------------------------------------------------|----------------------------------------------------------------|
|                                                        |                                                         | ↓                                                  |                                                                |
| GHs $_{\beta}$ -1,2-Man $_n$                           | C3                                                      | ACT94389.1-Dfer_3176-C3                            | G-IHFKRKKE-PVLFPAEDSQ--K-----ANEWPGGCEPRVAVTEDGL-YVVI 153      |
|                                                        |                                                         | ALJ48509.1-BACOVA_03624-C3                         | G-THFOREKT-PVFPDNDQ--K-----ELEWPGGCEPRVAVTEDGL-YVVI 159        |
|                                                        |                                                         | AAO78885.1-BT3780-C3                               | G-IHFKRKKT-PVFPDNDQ--K-----KLEWPGGCEPRVAVTEDGL-YVVI 156        |
| GPs $_{\beta}$ -1,2-Man $_n$                           | C4                                                      | CAC96089.1-Lin0857-C4                              | G-HHFTLDEK-PFL-YFF-----NEYQTFGIEDARVTIQIDTY-HVNF 155           |
|                                                        |                                                         | ABY93074.1-Teth514_1789-C6                         | G-INFERFDK-PVL-VGE-----IQEAWGVDEPRITKIDNKY-YMLY 112            |
| GPs $_{\beta}$ -1,2-Man $_n$                           | C6                                                      | ABY93073.1-Teth514_1788-C6                         | G-INFMRLDK-PVM-SNE-----TEQELRGLDEPRIVKIDGIY-YMY 106            |
|                                                        |                                                         | CAZ94304.1-Zobellia_231-C5                         | G-IHFNRCSEPAFEPST-----DGPDKGGIEDPRIVKFGEEF-YVY 102             |
| GPs $_{\beta}$ -1,3-Man $_n$                           | UC7                                                     | 340101.Vvad_PD3074-U7-UC7                          | GGADWQFDLSRPMAMPFLFDRDRFLARGMRDGMFDYANGCIEDPRLFYFEEQL-YLSV 130 |
|                                                        |                                                         | VCV21228.1-RIL182_01099-C1                         | G-IDGFRFDWYPIILLPTCPEETN-----VYDMRLTKHEDGVIYGVF 144            |
| GPs $_{\beta}$ -1,4-Man-Glc                            | C1                                                      | ADU21379.1-RAMP1-C1                                | G-TEGFRFRQYVVLPAITDDETN-----VYDMRLTKHEDGVIYGVF 144             |
|                                                        |                                                         | CAH06518.1-BF0772-C1                               | G-IDNFRFEWYPIITPEVVPATN-----VYDMRLTKHEDGVIYGVF 146             |
|                                                        |                                                         | AAS19693.1-Unk1-C1                                 | G-IDNFRFDWYPIITPEVVPATN-----VYDMRLTKHEDGVIYGVF 146             |
| GPs $_{\beta}$ -1,4-Man $_n$ / $\beta$ -1,4-Man-GlcNAc | UC3                                                     | MH0373_GL0093988-U3-UC3                            | G-FHFTPDSE-PVSVFCAPEEEEEYNETVYLNQ-QKALIGSWDPRINPVEGEY-YITY 119 |
|                                                        |                                                         | VCV21229.1-RIL182_01100-C2                         | A-IHWNFDEN-KINFVDE--EGKPFMPRY-----AYDPRLVKVEDTY-YIIW 124       |
| GPs $_{\beta}$ -1,4-Man $_n$ / $\beta$ -1,4-Man-GlcNAc | C2                                                      | AAD36300.1-TM1225-C2                               | G-INWIEPE-EIQWVDV--NGEPFQPSY-----AYDPRVVKIEDTY-YITF 120        |
|                                                        |                                                         | AAO76140.1-BT1033-C2                               | G-IHWDISHE-PIQFKAG--NTEIESEY-----KYDPRVTWIEDRY-WVTW 115        |
|                                                        |                                                         | ADD61463.1-Uhgb_MP-C2                              | A-INWNKKEE-PLKFCQD--DEEIGTWVY-----GYDPRVCFIEDRY-YVTW 118       |
|                                                        |                                                         | ADU20661.1-RAMP2-C2                                | G-IHWINDFP-RIVEQAESTEEVNWQGY-----GYDPRVCFIEDRF-WVTW 129        |
|                                                        |                                                         | WF_026485574.1-CalpoDRAFT_0075-C2                  | G-LNWDIHE-RIKFICD--DEEVSFRVY-----AYDPRVCKIEDRY-YITW 123        |
| WF_026486530.1-CalpoDRAFT_1209-C2                      | G-LNWDIHE-RIKFICD--DEEVSFRVY-----AYDPRVCKIEDRY-YITW 123 |                                                    |                                                                |
| GPs $_{\beta}$ -1,4-Man-GlcA UC1                       | MH0431_GL0150624-U1-UC1                                 | G-KQWKPAHP-PWLETAG-----RHPELEIYDPRLVIEDRC-YICF 105 |                                                                |

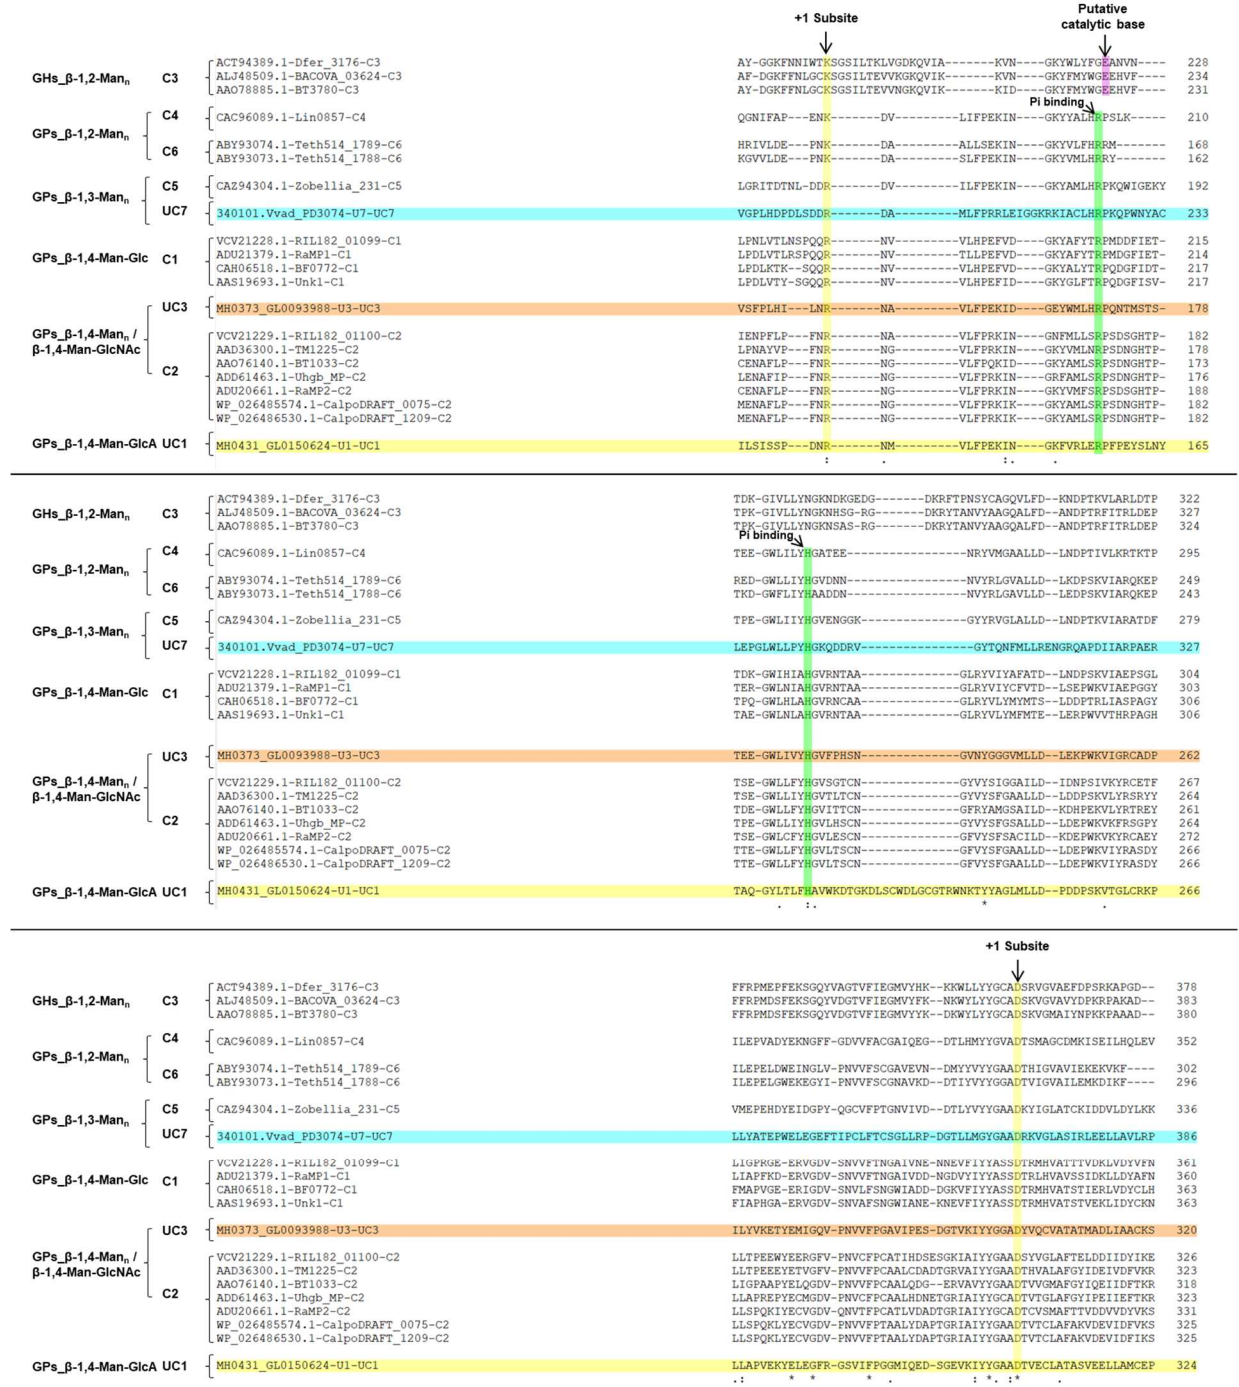

**Figure S2:** Multiple sequence alignment of all the characterized GH130 enzymes, including U1, U3 and U7.

Figure S3

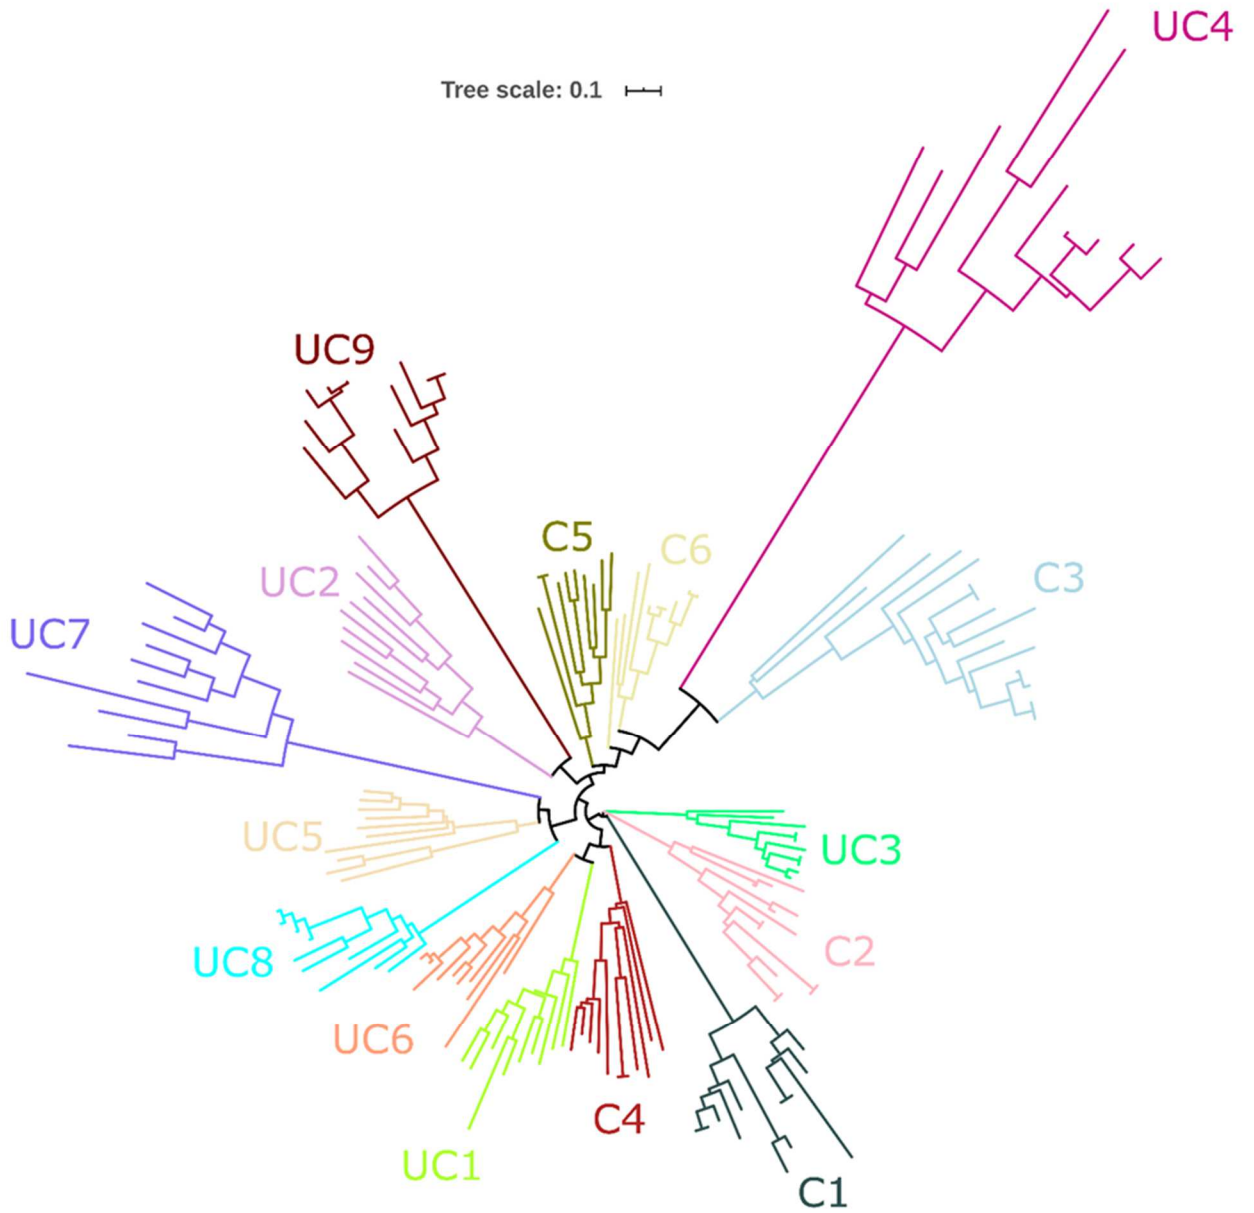

**Figure S3:** Maximum-likelihood phylogenetic tree, generated using 10 representative sequences for each SSN meta-node, defined with an E-value threshold of  $10^{-70}$ .

**Figure S4**

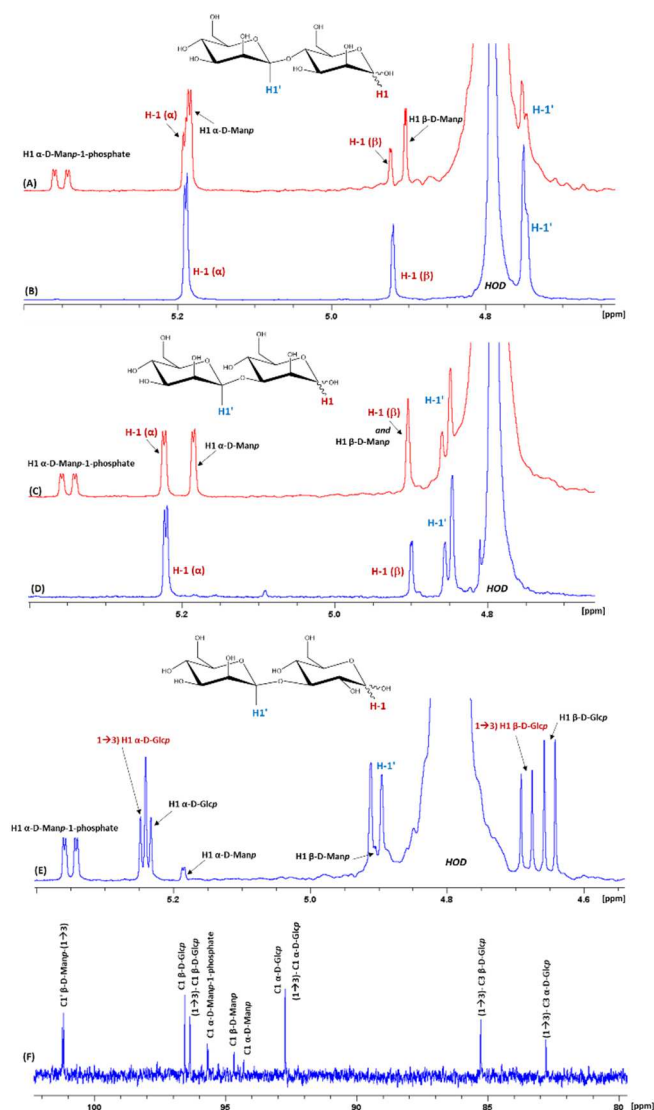

**Figure S4:** NMR analysis of the reverse-phosphorolysis reactional mixtures incubation for 24hrs with U3 and U7. The reactions were performed in the presence of 10 mM of  $\alpha$ Man1P (glycosyl donor) and 10 mM Glc or Man (acceptors). (A, B, C, D, E) 500 MHz <sup>1</sup>H NMR spectra of the anomeric region (5.5-4.5 ppm) and (F) <sup>13</sup>C NMR spectra region (102-80 ppm). (A), U3 reaction medium: at 5.19 ppm (H1 $\alpha$ ), 4.92 ppm (H1 $\beta$ ), 4.74 ppm (H1'). (B),  $\beta$ -1,4-mannobiose standard (Megazyme). (C), U7 reaction medium performed with Man as acceptor: at 5.22 ppm (H1 $\alpha$ ), 4.90 ppm (H1 $\beta$ ), 4.85 ppm (H1'). (D),  $\beta$ -1,3-mannobiose standard (Carbosynth). (E, F), U7 reaction medium performed with Glc as acceptor: at 5.24 ppm (H1 $\alpha$ ), 4.68 ppm (H1 $\beta$ ), 4.90 ppm (H1') and 85.2 ppm (1 $\rightarrow$ 3)- C3  $\beta$ -D-Glcp, 82,7 ppm (1 $\rightarrow$ 3)- C3  $\alpha$ -D-Glcp.



Figure S5

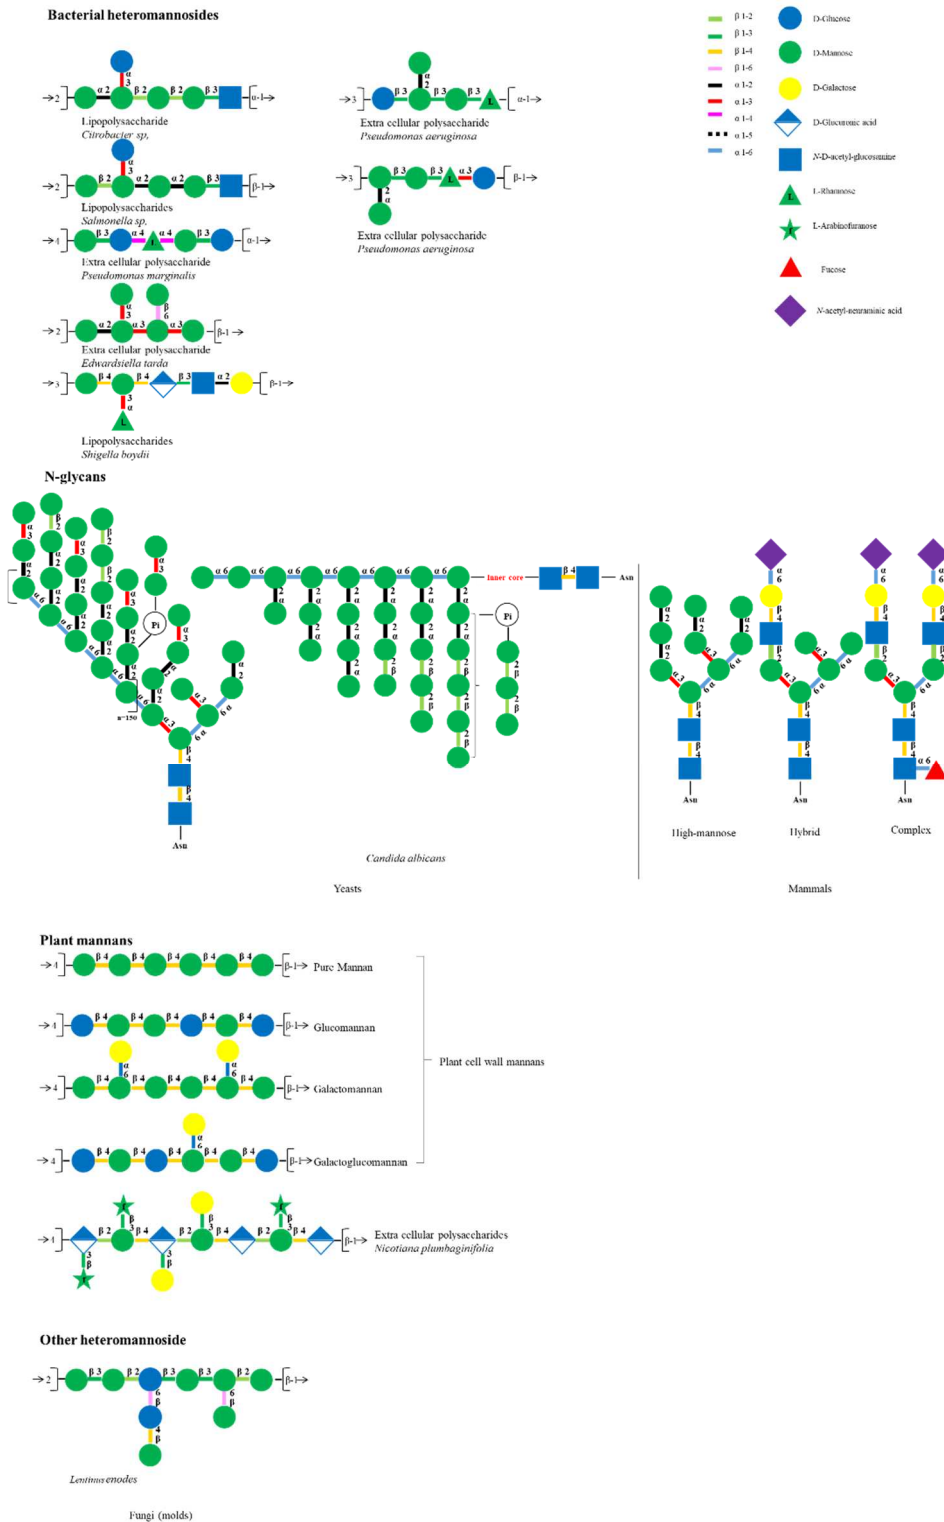

Figure S5: Examples of mannoside and heteromannoside structures containing the motifs targeted by GH130 enzymes.

**Figure S6**

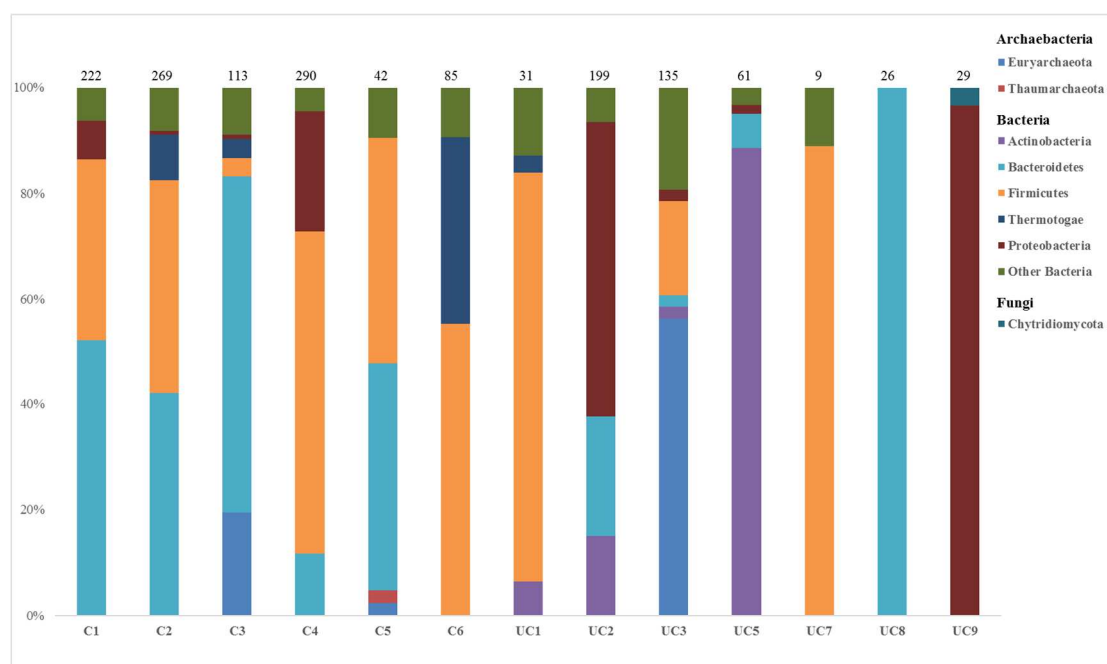

**Figure S6:** Taxonomical origin of the GH130 sequences listed in the CAZy database, for each SSN meta-node.

**Table S1**

Accession numbers of all the GH130 sequences used in this study, classified by meta-node. Each line corresponds to one node, which might contain several sequences. The accession numbers of the characterized enzymes are highlighted in green.

**C1**

|                                                                                                                                                                                                                                                                                                                                                                                                                                                                                                                                                                                                                                                                                                                                                                                                                                                                                                                                                                                                                                                                                                                                                                                                                                                                                                                                                                                                                                                                                                                                                                                                                                                                                                                                                                                                                                                                                                                                                                                                                                                                                                                                                                                                                                                                                                                                                                                                                                                                                                                                                                                                                   |
|-------------------------------------------------------------------------------------------------------------------------------------------------------------------------------------------------------------------------------------------------------------------------------------------------------------------------------------------------------------------------------------------------------------------------------------------------------------------------------------------------------------------------------------------------------------------------------------------------------------------------------------------------------------------------------------------------------------------------------------------------------------------------------------------------------------------------------------------------------------------------------------------------------------------------------------------------------------------------------------------------------------------------------------------------------------------------------------------------------------------------------------------------------------------------------------------------------------------------------------------------------------------------------------------------------------------------------------------------------------------------------------------------------------------------------------------------------------------------------------------------------------------------------------------------------------------------------------------------------------------------------------------------------------------------------------------------------------------------------------------------------------------------------------------------------------------------------------------------------------------------------------------------------------------------------------------------------------------------------------------------------------------------------------------------------------------------------------------------------------------------------------------------------------------------------------------------------------------------------------------------------------------------------------------------------------------------------------------------------------------------------------------------------------------------------------------------------------------------------------------------------------------------------------------------------------------------------------------------------------------|
| <p>["Ncazy AOC95706.1 4-O-beta-D-mannosyl-D-glucose phosphorylase [Flavobacterium anhuiense]",<br/>"cazy AWK07196.1 glycosidase [Flavobacterium sp. HYN0056]",<br/>"cazy AXB58825.1 glycosidase [Flavobacterium sp. HYN0086]",<br/>"cazy 146157100 gb ABQ07954.1  protein of unknown function [Flavobacterium johnsoniae UW101]"]</p>                                                                                                                                                                                                                                                                                                                                                                                                                                                                                                                                                                                                                                                                                                                                                                                                                                                                                                                                                                                                                                                                                                                                                                                                                                                                                                                                                                                                                                                                                                                                                                                                                                                                                                                                                                                                                                                                                                                                                                                                                                                                                                                                                                                                                                                                             |
| <p>["cazy CCgij 315447815 gb ADU21379.1 β-1", "4-mannosylglucose phosphorylase_glycosidase related protein [Ruminococcus albus 7 = DSM 20455]",<br/>"rumen552_GL1509507_1 [gene] locus=scaffold458827_1:1426:2586:+[Complete]"]</p>                                                                                                                                                                                                                                                                                                                                                                                                                                                                                                                                                                                                                                                                                                                                                                                                                                                                                                                                                                                                                                                                                                                                                                                                                                                                                                                                                                                                                                                                                                                                                                                                                                                                                                                                                                                                                                                                                                                                                                                                                                                                                                                                                                                                                                                                                                                                                                               |
| <p>["cazy CCgij 42556009 gb AAS19693.1 β-1", "4-mannosylglucose phosphorylase_Unk1 [Cellvibrio mixtus]",<br/>"cazy AQT61561.1 glycosidase [Cellvibrio sp. PSBB023]",<br/>"cazy ARU28674.1 glycosidase [Cellvibrio sp. PSBB006]",<br/>"cazy 190688591 gb ACE86269.1  conserved domain protein [Cellvibrio japonicus Ueda107]",<br/>"cazy 189949756 gb ABD79771.1  glycosidase", "PH1107-related [Saccharophagus degradans 2-40]"]</p>                                                                                                                                                                                                                                                                                                                                                                                                                                                                                                                                                                                                                                                                                                                                                                                                                                                                                                                                                                                                                                                                                                                                                                                                                                                                                                                                                                                                                                                                                                                                                                                                                                                                                                                                                                                                                                                                                                                                                                                                                                                                                                                                                                              |
| <p>["cazy CCgij 60491760 emb CAH06518.1 β-1", "4-mannosylglucose phosphorylase_conserved hypothetical protein [Bacteroides fragilis NCTC 9343]",<br/>"cazy AST52477.1 glycosidase [Parabacteroides sp. CT06]",<br/>"cazy AUJ45342.1 glycosidase [Bacteroides fragilis]",<br/>"cazy AVM47144.1 glycosidase [Victivallales bacterium CCUG 44730]",<br/>"cazy SCV06945.1 conserved hypothetical protein [Bacteroides ovatus V975]",<br/>"humangutMH0002_GL0047733 [gene] locus=scaffold13171_4:7351:8523:- [Complete] codon-table.11",<br/>"humangutMH0030_GL0024174 [gene] locus=scaffold3427_5:970:2142:+ [Complete] codon-table.11",<br/>"humangutMH0031_GL0013281 [gene] locus=scaffold17867_1:3054:4226:- [Complete] codon-table.11",<br/>"humangutMH0046_GL0000475 [gene] locus=scaffold34128_5:3085:4257:- [Complete] codon-table.11",<br/>"humangutMH0047_GL0030846 [gene] locus=scaffold14012_1:552:1724:+ [Complete] codon-table.11",<br/>"humangutMH0057_GL0015944 [gene] locus=scaffold7238_2:27269:28441:+ [Complete] codon-table.11",<br/>"humangutMH0068_GL0025047 [gene] locus=scaffold2668_4:6952:8124:+ [Complete] codon-table.11",<br/>"humangutMH0096_GL0108095 [gene] locus=scaffold10502_7:3798:4970:+ [Complete] codon-table.11",<br/>"humangutMH0107_GL0014100 [gene] locus=scaffold94184_3:3232:4404:+ [Complete] codon-table.11",<br/>"humangutMH0108_GL0084746 [gene] locus=scaffold24961_2:3115:4287:- [Complete] codon-table.11",<br/>"humangutMH0110_GL0036574 [gene] locus=scaffold64034_1:21985:23157:- [Complete] codon-table.11",<br/>"humangutMH0118_GL0094753 [gene] locus=scaffold25193_11:6159:7331:- [Complete] codon-table.11",<br/>"humangutMH0204_GL0152049 [gene] locus=scaffold123145_1:6065:7237:- [Complete] codon-table.11",<br/>"humangutMH0319_GL0128255 [gene] locus=scaffold68360_3:154:1326:+ [Complete] codon-table.11",<br/>"humangutMH0413_GL0134704 [gene] locus=scaffold113148_1:5774:6946:- [Complete] codon-table.11",<br/>"humangutMH0439_GL0204787 [gene] locus=scaffold128360_1:19466:20638:+ [Complete] codon-table.11",<br/>"humangutO2_CD2_0_GL0092646 [gene] locus=scaffold23217_1:4473:5645:- [Complete] codon-table.11",<br/>"humangutO2_UC1-1_GL0135101 [gene] locus=scaffold82652_1:11269:12441:+ [Complete] codon-table.11",<br/>"humangutV1_CD49-0_GL0042171 [gene] locus=scaffold98_1:6271:7443:+ [Complete] codon-table.11",<br/>"humangutV1_FI09_GL0019029 [gene] locus=scaffold113036_3:3584:4756:+ [Complete] codon-table.11",<br/>"humangutV1_FI14_GL0197754 [gene] locus=scaffold4657_3:19502:20674:- [Complete] codon-table.11",</p> |

"humangutV1.FI21\_GL0042399 [gene] locus=scaffold11131\_1:28543:29715:- [Complete] codon-table.11",

"humangutV1.UC12-4\_GL0087291 [gene] locus=scaffold46695\_1:6095:7267:+ [Complete] codon-table.11",

"humangutV1.UC17-2\_GL0138817 [gene] locus=scaffold101158\_2:8753:9925:+ [Complete] codon-table.11",

"humangutDLF013\_GL0071348 [gene] locus=scaffold15346\_3:2304:3476:+ [Complete] codon-table.11",

"humangutNOM012\_GL0077981 [gene] locus=scaffold47201\_8:3023:4195:- [Complete] codon-table.11",

"humangut764588959-stool1\_revised\_scaffold37899\_1\_gene92472 strand:- start:416 stop:1588 length:1173 start\_codon:yes stop\_codon:yes gene\_type:complete [Complete] codon-table.11",

"humangut340101.Vrad\_PD1405 [Complete]:- codon-table.11",

"mouseS-Fe1\_GL0032980 [gene] locus=scaffold1050\_1:65236:66408:+ [Complete] codon-table.11",

"mouseG1-1A\_GL0112135 [gene] locus=scaffold85946\_1:9974:11146:+ [Complete] codon-table.11",

"mouseG1-4A\_GL0002753 [gene] locus=scaffold255\_6:6975:8147:- [Complete] codon-table.11",

"pigPIG\_151\_GL0132399 [gene] locus=scaffold257136\_1:829:2001:+ [Complete] codon-table.11",

"pigPIG-042\_GL0083904 [gene] locus=scaffold91070\_1:3176:4348:+ [Complete] codon-table.11",

"pigPIG-042\_GL0107950 [gene] locus=scaffold40045\_4:18612:19784:+ [Complete] codon-table.11",

"pigBHZ-5B\_GL0196560 [gene] locus=scaffold1120\_5:1578:2750:+ [Complete] codon-table.11",

"rumen553\_GL0180945\_1 [gene] locus=scaffold6020\_1:9339:10511:-[Complete]",

"rumen553\_GL0344582\_1 [gene] locus=scaffold304915\_1:14287:15459:-[Complete]",

"rumen553\_GL0418645\_1 [gene] locus=scaffold113043\_2:120:1292:+[Complete]",

"rumen553\_GL0745339\_1 [gene] locus=scaffold77336\_4:40365:41537:-[Complete]",

"rumen552\_GL1330311\_1 [gene] locus=scaffold418063\_1:3715:4887:-[Complete]",

"rumen554\_GL0598331\_1 [gene] locus=scaffold200869\_1:918:2090:-[Complete]",

"rumen554\_GL1420526\_1 [gene] locus=scaffold18984\_1:2700:3872:+[Complete]",

"rumen554\_GL2381906\_1 [gene] locus=scaffold35339\_1:1115:2287:+[Complete]",

"rumen0081\_GL1835481\_1 [gene] locus=scaffold292226\_1:34868:36040:-[Complete]",

"rumen100058\_GL1296115\_1 [gene] locus=scaffold3360526\_1:2683:3855:-[Complete]",

"rumen100058\_GL1415020\_1 [gene] locus=scaffold1781521\_1:4254:5426:+[Complete]",

"rumen100058\_GL2060545\_1 [gene] locus=scaffold255740\_1:1392:2564:+[Complete]",

"rumen100058\_GL2074080\_1 [gene] locus=scaffold484796\_2:1768:2940:-[Complete]",

"rumen2009040\_GL1506655\_1 [gene] locus=scaffold424\_2:10634:11806:+[Complete]",

"rumen7049\_GL0177938\_1 [gene] locus=scaffold170653\_1:280:1452:-[Complete]",

"rumen7049\_GL1540641\_1 [gene] locus=scaffold591523\_1:826:1998:+[Complete]",

"cazygi|671712711|gb|AII64984.1| glycosidase [Bacteroides dorei]",

"cazygi|301161859|emb|CBW21403.1| conserved hypothetical protein [Bacteroides fragilis 638R]",

"cazygi|922660742|emb|CUA17426.1| 4-O-beta-D-mannosyl-D-glucose phosphorylase [Bacteroides fragilis]",

"cazygi|794204885|gb|AKA50876.1| glycosidase [Bacteroides fragilis]",

"cazygi|1042799867|gb|ANQ59514.1| glycosidase [Bacteroides fragilis]",

"cazygi|52215005|dbj|BAD47598.1| conserved hypothetical protein [Bacteroides fragilis YCH46]",

"cazygi|938483303|gb|ALJ47534.1| 4-O-beta-D-mannosyl-D-glucose phosphorylase [Bacteroides ovatus]",

"cazygi|149935157|gb|ABR41854.1| conserved hypothetical protein [Parabacteroides distasonis ATCC 8503]",

"cazygi|460564980|gb|AGH13967.1| glycosylase [Prevotella sp. Sc00026]"

["cazyCCgi|VCV21228.1 4-O-beta-D-mannosyl-D-glucose phosphorylase [Roseburia intestinalis L1-82]",

"cazy|AVM41762.1 glycosidase [Fastidiosipila sanguinis]",

"cazy|AYF38259.1 glycosidase [Ethanoligenens harbinense]",

"cazy|AYF41005.1 glycosidase [Ethanoligenens harbinense]",

"humangutMH0003\_GL0066421 [gene] locus=scaffold31568\_5:287:1465:- [Complete] codon-table.11",

"humangutMH0113\_GL0091133 [gene] locus=scaffold6516\_6:4173:5351:+ [Complete] codon-table.11",

"humangutMH0124\_GL0095539 [gene] locus=scaffold96089\_5:4645:5823:- [Complete] codon-table.11",

"humangutMH0143\_GL0013868 [gene] locus=scaffold18775\_4:2159:3337:+ [Complete] codon-table.11",

"humangutMH0200\_GL0131568 [gene] locus=scaffold17224\_1:6867:8045:- [Complete] codon-table.11",

"humangutMH0396\_GL0022730 [gene] locus=scaffold98811\_2:4136:5314:- [Lack 5'-end] codon-table.11",

"humangutMH0431\_GL0109398 [gene] locus=scaffold114921\_1:81485:82663:- [Complete] codon-table.11",

"humangutO2.UC37-1\_GL0054917 [gene] locus=scaffold50480\_4:50:1228:- [Lack 5'-end] codon-table.11",

"humangutSZEY-35A\_GL0075720 [gene] locus=scaffold8896\_1:5193:6371:+ [Complete] codon-table.11",

"humangutT2D-33A\_GL0089601 [gene] locus=scaffold18086\_5:30121:31299:- [Complete] codon-table.11",

"mouseS-Fe2\_GL0160680 [gene] locus=scaffold84515\_1:46293:47471:+ [Complete] codon-table.11",

"mouseG1-7A\_GL0023841 [gene] locus=scaffold10583\_7:9507:10685:+ [Complete] codon-table.11",

"mouse1-2\_GL0101012 [gene] locus=scaffold7366\_22:6163:7341:- [Complete] codon-table.11",

"mouse26\_GL0113777 [gene] locus=scaffold73750\_3:1126:2304:- [Complete] codon-table.11",

"mouse2-7\_GL0077041 [gene] locus=scaffold37832\_1:52:1230:- [Complete] codon-table.11",

"mouse7-7\_GL0001996 [gene] locus=scaffold62865\_1:9959:11137:- [Complete] codon-table.11",

"pigPIG-117\_GL0190472 [gene] locus=scaffold262986\_1:8033:9211:+ [Complete] codon-table.11",

"pigPIG-033\_GL0076532 [gene] locus=scaffold132591\_1:865:2043:- [Complete] codon-table.11",

"pigPIG-033\_GL0121405 [gene] locus=scaffold24127\_3:5365:6543:- [Complete] codon-table.11",

"pigPIG-043\_GL0020493 [gene] locus=C1594118\_1:200:1378:+ [Complete] codon-table.11",

"pigPIG-061\_GL0061187 [gene] locus=scaffold150548\_2:2264:3442:+ [Complete] codon-table.11",

"pigPIG-066\_GL0171037 [gene] locus=scaffold156896\_1:74:1252:- [Complete] codon-table.11",

"pigPIG-105\_GL0070140 [gene] locus=scaffold21854\_8:175:1353:- [Complete] codon-table.11",

"pigPIG-108\_GL0038609 [gene] locus=scaffold50953\_1:13642:14820:- [Complete] codon-table.11",

"pigPIG-109\_GL0153659 [gene] locus=scaffold15355\_2:101:1279:+ [Complete] codon-table.11",

"pigBHZ-4B\_GL0046982 [gene] locus=scaffold6788\_10:5028:6206:- [Complete] codon-table.11",

"pigBMZ-17B\_GL0130458 [gene] locus=scaffold31446\_2:852:2030:+ [Complete] codon-table.11",

"pigEYZ-120B\_GL0239890 [gene] locus=scaffold124621\_1:14640:15818:- [Complete] codon-table.11",

"rumen553\_GL0080408\_1 [gene] locus=scaffold389397\_1:289:1467:-[Complete]",

"rumen553\_GL0368033\_1 [gene] locus=scaffold42880\_1:939:2117:+[Complete]",

"rumen553\_GL0608442\_1 [gene] locus=scaffold99516\_2:18358:19536:+[Complete]",

"rumen553\_GL0672485\_1 [gene] locus=scaffold250358\_1:40472:41650:-[Complete]",

"rumen553\_GL0799271\_1 [gene] locus=scaffold285696\_1:2:1177:-[Lack 3'-end]",

"rumen552\_GL0196067\_1 [gene] locus=scaffold1044748\_1:19093:20271:-[Complete]",

"rumen552\_GL1374889\_1 [gene] locus=scaffold1084712\_1:1435:2613:-[Complete]",

"rumen583\_GL0314713\_1 [gene] locus=scaffold131305\_1:732:1910:+[Complete]",

"rumen583\_GL0754106\_1 [gene] locus=scaffold195983\_1:23761:24939:+[Complete]",

"rumen554\_GL0138869\_1 [gene] locus=scaffold288892\_1:859:2037:-[Complete]",

"rumen554\_GL0823804\_1 [gene] locus=scaffold1964144\_1:1691:2869:-[Complete]",

"rumen554\_GL2538377\_1 [gene] locus=scaffold618786\_1:150:1328:-[Complete]",

"rumen555\_GL2498922\_1 [gene] locus=scaffold1308004\_2:1032:2210:-[Complete]",

"rumen0081\_GL0200567\_1 [gene] locus=scaffold583614\_2:389:1567:+[Complete]",

"rumen0081\_GL0989309\_1 [gene] locus=scaffold391367\_2:395:1573:+[Complete]",

"rumen100058\_GL0662622\_1 [gene] locus=scaffold1264265\_3:2349:3527:-[Complete]",

|                                                                                                   |
|---------------------------------------------------------------------------------------------------|
| "rumen2009040_GL0355188_1 [gene] locus=scaffold318654_1:1130:2308:-[Complete]",                   |
| "rumen2009040_GL1153821_1 [gene] locus=scaffold182269_4:4556:5734:+[Complete]",                   |
| "rumen2009040_GL1798234_1 [gene] locus=scaffold1815524_1:92:1270:-[Complete]",                    |
| "rumen2009040_GL2361669_1 [gene] locus=scaffold2277265_2:2813:3991:+[Complete]",                  |
| "rumen3042_GL2082550_1 [gene] locus=scaffold1268850_4:4066:5244:-[Complete]",                     |
| "rumen7049_GL1652958_1 [gene] locus=scaffold893802_4:6121:7299:+[Complete]",                      |
| "cazygi 295094605 emb CBK83696.1  Predicted glycosylase [Coprococcus sp. ART55/1]",               |
| "cazygi 315469862 gb ADU26466.1  glycosidase related protein [Ethanoligenens harbinense YUAN-3]", |
| "cazygi 291537317 emb CBL10429.1  Predicted glycosylase [Roseburia intestinalis M50/1]",          |
| "cazygi 291539263 emb CBL12374.1  Predicted glycosylase [Roseburia intestinalis XB6B4]",          |
| ["cazygi 1000297354 gb AML27056.1  putative glycosidase [Bacillus sp. N16-5]"]                    |
| ["cazygi 1008894275 gb AMR25942.1  glycosidase [Hymenobacter sp. PAMC 26554]"]                    |
| ["cazygi 1028462835 gb ANE45758.1  glycosidase [Paenibacillus swuensis]"]                         |
| ["cazygi 1031984082 dbj BAV09483.1  predicted glycoside hydrolase [Filimonas lacunae]"]           |
| ["cazygi 1033477963 dbj BAV13071.1  glycosidase PH1107-related [Clostridium cellulovorans]",      |
| "cazygi 302578871 gb ADL52883.1  glycosidase related protein [Clostridium cellulovorans 743B]"]   |
| ["cazygi 1042792181 gb ANQ52748.1  unk1-like protein [Flammeovirga sp. MY04]",                    |
| "cazygi 261868893 gb ACY02068.1  hypothetical protein [Flammeovirga yaeyamensis]"]                |
| ["cazygi 1049756037 gb ANY69291.1  glycosidase [Paenibacillus sp. BIHB4019]"]                     |
| ["cazygi 169640140 gb ACA61147.1  conserved hypothetical protein [uncultured microorganism]",     |
| "humangutMH0003_GL0049222 [gene] locus=scaffold17664_2:8391:9566:+ [Complete] codon-table.11",    |
| "humangutMH0038_GL0001581 [gene] locus=scaffold2102_6:1247:2422:- [Complete] codon-table.11",     |
| "humangutMH0143_GL0027387 [gene] locus=scaffold76777_2:3841:5016:+ [Complete] codon-table.11",    |
| "humangutMH0198_GL0003384 [gene] locus=scaffold964_3:17833:19008:- [Complete] codon-table.11",    |
| "humangutMH0220_GL0233763 [gene] locus=C1944239_1:11:1186:- [Complete] codon-table.11",           |
| "humangutMH0250_GL0225137 [gene] locus=scaffold91081_4:1190:2365:- [Complete] codon-table.11",    |
| "humangutMH0281_GL0021541 [gene] locus=scaffold20_3:5981:7156:- [Complete] codon-table.11",       |
| "humangutMH0333_GL0065324 [gene] locus=scaffold55593_2:12263:13438:- [Complete] codon-table.11",  |
| "humangutMH0404_GL0002420 [gene] locus=scaffold48203_4:24403:25578:- [Complete] codon-table.11",  |
| "humangutO2_UC8-0_GL0042077 [gene] locus=scaffold31855_2:3308:4483:+ [Complete] codon-table.11",  |
| "humangutV1_UC26-0_GL0097455 [gene] locus=scaffold2640_7:6674:7849:+ [Complete] codon-table.11",  |
| "humangutDLM020_GL0058241 [gene] locus=scaffold14939_10:26:1201:- [Complete] codon-table.11",     |
| "humangutDOM005_GL0054482 [gene] locus=scaffold5697_6:9236:10411:+ [Complete] codon-table.11",    |
| "humangutNLM006_GL0090500 [gene] locus=scaffold24016_2:5835:7010:- [Complete] codon-table.11",    |
| "humangutT2D-26A_GL0135482 [gene] locus=scaffold16630_2:801:1976:- [Complete] codon-table.11",    |
| "mouseMC-6-1_GL0003210 [gene] locus=scaffold294_4:20864:22039:+ [Complete] codon-table.11",       |
| "mouse3-1_GL0031926 [gene] locus=scaffold18314_1:24130:25305:+ [Complete] codon-table.11",        |
| "mouse31_GL0057924 [gene] locus=scaffold36726_3:57584:58759:+ [Complete] codon-table.11",         |
| "mouse40_GL0063271 [gene] locus=scaffold33833_11:3019:4194:- [Complete] codon-table.11",          |
| "mouse7_GL0082073 [gene] locus=scaffold45200_2:6409:7584:+ [Complete] codon-table.11",            |
| "pigPIG_127_GL0225872 [gene] locus=scaffold57456_1:2:1177:+ [Lack 5'-end] codon-table.11",        |
| "pigPIG-002_GL0118353 [gene] locus=scaffold129520_1:1581:2756:- [Complete] codon-table.11",       |
| "pigPIG-028_GL0219785 [gene] locus=scaffold57117_1:1:1176:+ [Lack 5'-end] codon-table.11",        |
| "pigPIG-093_GL0085264 [gene] locus=scaffold80859_2:3:1178:+ [Lack 5'-end] codon-table.11",        |

|                                                                                                           |
|-----------------------------------------------------------------------------------------------------------|
| "pigEYZ-378B_GL0010923 [gene] locus=C2385022_1:23046:24221:+ [Complete] codon-table.11",                  |
| "rumen554_GL2240865_1 [gene] locus=scaffold177812_3:28559:29734:-[Complete]",                             |
| "rumen2009040_GL1743916_1 [gene] locus=scaffold1072038_1:4245:5420:-[Complete]",                          |
| "rumen3042_GL1764059_1 [gene] locus=scaffold13938_4:5273:6448:-[Complete]"                                |
| ["cazygi 177841338 gb ACB75590.1  glycosidase PH1107-related [Opitutus terrae PB90-1]"]                   |
| ["cazygi 220000696 gb ACL77297.1  glycosidase PH1107-related [[Clostridium] cellulolyticum H10]"]         |
| ["cazygi 237684844 gb ACR12108.1  conserved hypothetical protein [Teredinibacter turnerae T7901]"]        |
| ["cazygi 247543793 gb ACT00812.1  glycosidase PH1107-related [Paenibacillus sp. JDR-2]"]                  |
| ["cazygi 255346849 gb ACU06175.1  glycosidase PH1107-related [Pedobacter heparinus DSM 2366]"]            |
| ["cazygi 256039283 gb ACU62827.1  glycosidase PH1107-related [Chitinophaga pinensis DSM 2588]"]           |
| ["cazygi 262335521 gb ACY49318.1  glycosidase PH1107-related protein [Rhodothermus marinus DSM 4252],     |
| "cazygi 345113502 gb AEN74334.1  glycosidase related protein [Rhodothermus marinus SG0.5JP17-172]"        |
| ["cazygi 284158781 gb ADB80102.1  glycosidase [uncultured microorganism]",                                |
| "cazygi 82524102 emb CAJ19137.1  conserved hypothetical protein [unidentified microorganism]",            |
| "humangutMH00252_GL0130169 [gene] locus=scaffold46124_3:3552:4712:- [Complete] codon-table.11",           |
| "mouse19_GL0059980 [gene] locus=scaffold6821_5:1223:2383:- [Complete] codon-table.11",                    |
| "pigPIG_119_GL0111674 [gene] locus=scaffold53781_2:761:1921:+ [Complete] codon-table.11",                 |
| "pigPIG-018_GL0182330 [gene] locus=scaffold12858_2:87701:88861:+ [Complete] codon-table.11",              |
| "pigPIG-027_GL0246440 [gene] locus=scaffold83656_4:1373:2533:- [Complete] codon-table.11",                |
| "pigBHZ-9B_GL0192845 [gene] locus=scaffold48502_3:19993:21153:+ [Complete] codon-table.11",               |
| "rumen553_GL0780103_1 [gene] locus=scaffold410565_1:8371:9531:-[Complete]",                               |
| "rumen552_GL0626026_1 [gene] locus=scaffold1113599_1:132:1292:-[Complete]",                               |
| "rumen552_GL0940734_1 [gene] locus=scaffold696891_2:3677:4837:+[Complete]",                               |
| "rumen552_GL1700463_1 [gene] locus=scaffold1036305_1:3406:4566:-[Complete]",                              |
| "rumen554_GL1222817_1 [gene] locus=scaffold68735_4:6051:7211:+[Complete]",                                |
| "rumen554_GL1613293_1 [gene] locus=scaffold718363_1:1619:2779:+[Complete]",                               |
| "rumen555_GL0221201_1 [gene] locus=scaffold13840_1:649:1809:-[Complete]",                                 |
| "rumen555_GL1629362_1 [gene] locus=scaffold120052_5:43473:44633:+[Complete]",                             |
| "rumen0081_GL0103663_1 [gene] locus=scaffold830863_2:1259:2419:-[Complete]",                              |
| "rumen0081_GL0134462_1 [gene] locus=scaffold98731_3:12335:13495:+[Complete]",                             |
| "rumen0081_GL0514060_1 [gene] locus=scaffold5614_1:8340:9500:+[Complete]",                                |
| "rumen0081_GL1036364_1 [gene] locus=scaffold454329_1:2137:3297:+[Complete]",                              |
| "rumen0081_GL1258454_1 [gene] locus=scaffold882583_1:798:1958:-[Complete]",                               |
| "rumen0081_GL1762675_1 [gene] locus=scaffold894285_1:840:2000:+[Complete]",                               |
| "rumen100058_GL0026523_1 [gene] locus=scaffold393135_3:1042:2202:+[Complete]",                            |
| "rumen2009040_GL3366046_1 [gene] locus=scaffold2399118_1:3222:4382:+[Complete]",                          |
| "rumen3042_GL0863569_1 [gene] locus=scaffold2513516_2:1667:2827:-[Complete]",                             |
| "rumen3042_GL2268751_1 [gene] locus=scaffold1869024_2:6750:7910:-[Complete]",                             |
| "rumen3042_GL2297951_1 [gene] locus=scaffold1001230_1:94:1254:+[Complete]",                               |
| "rumen7049_GL0275719_1 [gene] locus=scaffold2125146_1:3791:4951:+[Complete]"                              |
| ["cazygi 294980251 gb ADF50716.1  glycosidase", " PH1107-related protein [Zunongwangia profunda SM-A87]"] |
| ["cazygi 294983326 gb ADF53791.1  glycosidase", " PH1107-related protein [Zunongwangia profunda SM-A87]"] |
| ["cazygi 306531536 gb ADN01070.1  putative glycosylase [Spirochaeta thermophila DSM 6192]",               |
| "cazygi 339410803 gb AEJ60368.1  glycosidase related protein [Spirochaeta thermophila DSM 6578]"          |

|                                                                                                                                                                                                                                                                                                                                                                                                                                                                                                                                                                                                                                                                                                                                                                                                                                                                                                                                                                                                                                                                                                         |
|---------------------------------------------------------------------------------------------------------------------------------------------------------------------------------------------------------------------------------------------------------------------------------------------------------------------------------------------------------------------------------------------------------------------------------------------------------------------------------------------------------------------------------------------------------------------------------------------------------------------------------------------------------------------------------------------------------------------------------------------------------------------------------------------------------------------------------------------------------------------------------------------------------------------------------------------------------------------------------------------------------------------------------------------------------------------------------------------------------|
| ["cazygi 311908637 gb ADQ19078.1  glycosidase related protein [Leadbetterella byssophila DSM 17132]"                                                                                                                                                                                                                                                                                                                                                                                                                                                                                                                                                                                                                                                                                                                                                                                                                                                                                                                                                                                                    |
| ["cazygi 315471962 gb ADU28565.1  glycosidase related protein [Bacillus cellulosiiticus DSM 2522]"                                                                                                                                                                                                                                                                                                                                                                                                                                                                                                                                                                                                                                                                                                                                                                                                                                                                                                                                                                                                      |
| ["cazygi 324974528 gb ADY53512.1  glycosidase related protein [Pseudopedobacter saltans DSM 12145]"                                                                                                                                                                                                                                                                                                                                                                                                                                                                                                                                                                                                                                                                                                                                                                                                                                                                                                                                                                                                     |
| ["cazygi 326549119 gb ADZ77504.1  glycosidase related protein [Sphingobacterium sp. 21]"                                                                                                                                                                                                                                                                                                                                                                                                                                                                                                                                                                                                                                                                                                                                                                                                                                                                                                                                                                                                                |
| ["cazygi 332174970 gb AEE24224.1  glycosidase related protein [Glaciecola sp. 4H-3-7+YE-5],<br>"cazygi 409028202 gb AFV00487.1  hypothetical protein M5M_16780 [Simidiua agarivorans SA1 = DSM 21679]"                                                                                                                                                                                                                                                                                                                                                                                                                                                                                                                                                                                                                                                                                                                                                                                                                                                                                                  |
| ["cazygi 332330851 gb AEE47952.1  hypothetical protein Halhy_0038 [Haliscomenobacter hydrossis DSM 1100]"                                                                                                                                                                                                                                                                                                                                                                                                                                                                                                                                                                                                                                                                                                                                                                                                                                                                                                                                                                                               |
| ["cazygi 332336263 gb AEE53364.1  glycosidase related protein [Haliscomenobacter hydrossis DSM 1100]"                                                                                                                                                                                                                                                                                                                                                                                                                                                                                                                                                                                                                                                                                                                                                                                                                                                                                                                                                                                                   |
| ["cazygi 357200024 gb AET57921.1  glycosidase like protein [Paenibacillus terrae HPL-003]"                                                                                                                                                                                                                                                                                                                                                                                                                                                                                                                                                                                                                                                                                                                                                                                                                                                                                                                                                                                                              |
| ["cazygi 361061660 gb AEW00652.1  glycosidase related protein [Niastella koreensis GR20-10]"                                                                                                                                                                                                                                                                                                                                                                                                                                                                                                                                                                                                                                                                                                                                                                                                                                                                                                                                                                                                            |
| ["cazygi 373946953 gb AEY67874.1  putative glycosylase [Clostridium sp. BNL1100]"                                                                                                                                                                                                                                                                                                                                                                                                                                                                                                                                                                                                                                                                                                                                                                                                                                                                                                                                                                                                                       |
| ["cazygi 378568988 gb AFC29298.1  hypothetical protein PM3016_2410 [Paenibacillus mucilaginosus 3016],<br>"cazygi 384090041 gb AFH61477.1  glycosidase [Paenibacillus mucilaginosus K02]",<br>"cazygi 336297581 gb AEI40684.1  conserved hypothetical protein [Paenibacillus mucilaginosus KNP414]"                                                                                                                                                                                                                                                                                                                                                                                                                                                                                                                                                                                                                                                                                                                                                                                                     |
| ["cazygi 395811001 gb AFN73750.1  glycosidase PH1107-related protein [Melioribacter roseus P3M-2]"                                                                                                                                                                                                                                                                                                                                                                                                                                                                                                                                                                                                                                                                                                                                                                                                                                                                                                                                                                                                      |
| ["cazygi 407728379 dbj BAM48377.1  hypothetical protein AXY_22450 [Amphibacillus xylanus NBRC 15112]"                                                                                                                                                                                                                                                                                                                                                                                                                                                                                                                                                                                                                                                                                                                                                                                                                                                                                                                                                                                                   |
| ["cazygi 537743161 emb CDF80804.1  PH1107-like glycosidase [Formosa agariphila KMM 3901]"                                                                                                                                                                                                                                                                                                                                                                                                                                                                                                                                                                                                                                                                                                                                                                                                                                                                                                                                                                                                               |
| ["cazygi 570745708 gb AHF16220.1  glycosidase [Niabella soli DSM 19437]"                                                                                                                                                                                                                                                                                                                                                                                                                                                                                                                                                                                                                                                                                                                                                                                                                                                                                                                                                                                                                                |
| ["cazygi 595617251 gb AHM60894.1  glycosidase-like protein [Flammeovirgaceae bacterium 311]"                                                                                                                                                                                                                                                                                                                                                                                                                                                                                                                                                                                                                                                                                                                                                                                                                                                                                                                                                                                                            |
| ["cazygi 610421555 gb AHW58759.1  glycosidase [Draconibacterium orientale]"                                                                                                                                                                                                                                                                                                                                                                                                                                                                                                                                                                                                                                                                                                                                                                                                                                                                                                                                                                                                                             |
| ["cazygi 672715735 emb CDT00074.1  4-O-beta-D-mannosyl-D-glucose phosphorylase [Sphingobacterium sp. PM2-P1-29]"                                                                                                                                                                                                                                                                                                                                                                                                                                                                                                                                                                                                                                                                                                                                                                                                                                                                                                                                                                                        |
| ["cazygi 673067755 emb CDZ25110.1  hypothetical protein CCDG5_2018 [[Clostridium] cellulosi]"                                                                                                                                                                                                                                                                                                                                                                                                                                                                                                                                                                                                                                                                                                                                                                                                                                                                                                                                                                                                           |
| ["cazygi 686546537 gb AIQ57233.1  glycosidase [Paenibacillus borealis],<br>"cazygi 686557130 gb AIQ67824.1  glycosidase [Paenibacillus graminis],<br>"cazygi 806911806 emb CQR54414.1  4-O-beta-D-mannosyl-D-glucose phosphorylase [Paenibacillus riograndensis SBR5]"                                                                                                                                                                                                                                                                                                                                                                                                                                                                                                                                                                                                                                                                                                                                                                                                                                  |
| ["cazygi 686552468 gb AIQ63163.1  glycosidase [Paenibacillus stellifer]"                                                                                                                                                                                                                                                                                                                                                                                                                                                                                                                                                                                                                                                                                                                                                                                                                                                                                                                                                                                                                                |
| ["cazygi 808183734 gb AKD03278.1  glycosidase [Pontibacter korlensis]"                                                                                                                                                                                                                                                                                                                                                                                                                                                                                                                                                                                                                                                                                                                                                                                                                                                                                                                                                                                                                                  |
| ["cazygi 874567365 emb CRY96301.1  hypothetical protein [uncultured prokaryote],<br>"pigPIG-018_GL0158480 [gene] locus=scaffold171626_2:17405:18559:+ [Complete] codon-table.11",<br>"pigBHZ-9B_GL0146223 [gene] locus=scaffold94856_1:175:1329:+ [Complete] codon-table.11",<br>"rumen552_GL0148742_1 [gene] locus=scaffold431873_1:24917:26071:-[Complete]",<br>"rumen552_GL1731584_1 [gene] locus=scaffold10134_1:79333:80487:-[Complete]",<br>"rumen554_GL1022204_1 [gene] locus=scaffold359402_2:1862:3016:-[Complete]",<br>"rumen554_GL2723235_1 [gene] locus=scaffold23964_1:370:1524:+[Complete]",<br>"rumen554_GL2929602_1 [gene] locus=scaffold181747_1:1742:2896:-[Complete]",<br>"rumen0081_GL0118178_1 [gene] locus=scaffold1011559_2:13805:14959:+[Complete]",<br>"rumen0081_GL0924944_1 [gene] locus=C39741617_1:24:1178:-[Complete]",<br>"rumen100058_GL1676940_1 [gene] locus=scaffold587872_2:4351:5505:+[Complete]",<br>"rumen3042_GL1475731_1 [gene] locus=scaffold2132912_1:3648:4802:-[Complete]",<br>"rumen7049_GL1822588_1 [gene] locus=scaffold867003_2:2185:3339:-[Complete]" |
| ["cazygi 88709570 gb EAR01803.1  hypothetical protein FB2170_14783 [Maribacter sp. HTCC2170]"                                                                                                                                                                                                                                                                                                                                                                                                                                                                                                                                                                                                                                                                                                                                                                                                                                                                                                                                                                                                           |
| ["cazygi 937828634 gb ALI98491.1  glycosidase [Rufibacter tibetensis]"                                                                                                                                                                                                                                                                                                                                                                                                                                                                                                                                                                                                                                                                                                                                                                                                                                                                                                                                                                                                                                  |
| ["cazygi 996008937 gb AMJ66328.1  glycosidase [Hymenobacter sp. PAMC 26628]"                                                                                                                                                                                                                                                                                                                                                                                                                                                                                                                                                                                                                                                                                                                                                                                                                                                                                                                                                                                                                            |



|                                                                                                                                                                                                                                                                                                                                                                                                                                                                                                                                                                                                                                                                                                                                                                                                                                                                                                                                                                                                                                                                                                                                                        |
|--------------------------------------------------------------------------------------------------------------------------------------------------------------------------------------------------------------------------------------------------------------------------------------------------------------------------------------------------------------------------------------------------------------------------------------------------------------------------------------------------------------------------------------------------------------------------------------------------------------------------------------------------------------------------------------------------------------------------------------------------------------------------------------------------------------------------------------------------------------------------------------------------------------------------------------------------------------------------------------------------------------------------------------------------------------------------------------------------------------------------------------------------------|
| <p>["cazy 996029876 gb AMJ87259.1  glycosidase [Alteromonas sp. Mac1]",<br/> "cazy 996033740 gb AMJ91122.1  glycosidase [Alteromonas sp. Mac2]",<br/> "cazy 1023067534 gb ANB2411.1  glycosidase [Alteromonas stellipolaris]"]</p>                                                                                                                                                                                                                                                                                                                                                                                                                                                                                                                                                                                                                                                                                                                                                                                                                                                                                                                     |
| <p>["cazy 998619555 dbj BAU55488.1  4-O-beta-D-mannosyl-D-glucose phosphorylase [Mucilagibacter gotjawali]"]</p>                                                                                                                                                                                                                                                                                                                                                                                                                                                                                                                                                                                                                                                                                                                                                                                                                                                                                                                                                                                                                                       |
| <p>["cazy AOE54287.1 glycosidase [Flavobacterium psychrophilum]",<br/> "cazy AOW17807.1 glycosidase [Polaribacter vadi]",<br/> "cazy AWH86882.1 glycosidase [Flavobacterium sp. HYN0059]",<br/> "cazy AWM14794.1 glycosidase [Flavobacterium sp. MEBIC07310]",<br/> "cazy 947264404 gb ALM47942.1  glycosidase [Flavobacterium psychrophilum]"]</p>                                                                                                                                                                                                                                                                                                                                                                                                                                                                                                                                                                                                                                                                                                                                                                                                    |
| <p>["cazy AOK90372.1 glycosidase [Paenibacillus polymyxa]",<br/> "cazy APB69112.1 glycosidase [Paenibacillus polymyxa]",<br/> "cazy APB73770.1 glycosidase [Paenibacillus polymyxa]",<br/> "cazy APO61726.1 glycosidase [Paenibacillus polymyxa]",<br/> "cazy ASR45393.1 glycosidase [Paenibacillus kribbensis]",<br/> "cazy AUO06676.1 glycosidase [Paenibacillus sp. lzh-N1]",<br/> "cazy AUS29147.1 glycosidase [Paenibacillus polymyxa]",<br/> "cazy 920791919 gb ALA44438.1  glycosidase [Paenibacillus peoriae]",<br/> "cazy 723615833 gb AIY09206.1  glycosidase [Paenibacillus polymyxa]",<br/> "cazy 565677757 gb AHC22327.1  glycosidase [Paenibacillus polymyxa CR1]",<br/> "cazy 305860624 gb ADM72412.1  glycosidase [Paenibacillus polymyxa E681]",<br/> "cazy 392305251 emb CCI71614.1  hypothetical protein PPM_4807 [Paenibacillus polymyxa M1]",<br/> "cazy 748408389 gb AJE51905.1  glycosidase [Paenibacillus polymyxa]",<br/> "cazy 309249536 gb ADO59103.1  glycosidase [Paenibacillus polymyxa SC2]",<br/> "cazy 595636231 gb AHM68489.1  glycosidase like protein [Paenibacillus polymyxa SQR-21]"]</p>                        |
| <p>["cazy AOM76025.1 glycosidase [Pedobacter steynii]",<br/> "cazy 941976244 gb ALL07673.1  glycosidase [Pedobacter sp. PACM 27299]"]</p>                                                                                                                                                                                                                                                                                                                                                                                                                                                                                                                                                                                                                                                                                                                                                                                                                                                                                                                                                                                                              |
| <p>["cazy AOS44739.1 4-O-beta-D-mannosyl-D-glucose phosphorylase [Lacunisphaera limnophila]",<br/> "cazy 573475039 gb AHF92050.1  glycosidase [Opitutaceae bacterium TAV5]"]</p>                                                                                                                                                                                                                                                                                                                                                                                                                                                                                                                                                                                                                                                                                                                                                                                                                                                                                                                                                                       |
| <p>["cazy AOS98644.1 4-O-beta-D-mannosyl-D-glucose phosphorylase [Microbulifer aggregans]"]</p>                                                                                                                                                                                                                                                                                                                                                                                                                                                                                                                                                                                                                                                                                                                                                                                                                                                                                                                                                                                                                                                        |
| <p>["cazy AOW21555.1 glycosidase [Lutibacter sp. LPB0138]"]</p>                                                                                                                                                                                                                                                                                                                                                                                                                                                                                                                                                                                                                                                                                                                                                                                                                                                                                                                                                                                                                                                                                        |
| <p>["cazy AOZ93121.1 glycosidase [Paenibacillus crassostreae]",<br/> "cazy AWV32547.1 glycosidase [Paenibacillus odorifer]",<br/> "cazy 686562510 gb AIQ73203.1  glycosidase [Paenibacillus odorifer]",<br/> "cazy 690615645 gb AIQ16858.1  glycosidase [Paenibacillus sp. FSL H7-0357]",<br/> "cazy 690621761 gb AIQ22775.1  glycosidase [Paenibacillus sp. FSL H7-0737]",<br/> "cazy 686517730 gb AIQ28431.1  glycosidase [Paenibacillus sp. FSL P4-0081]",<br/> "cazy 686523878 gb AIQ34578.1  glycosidase [Paenibacillus sp. FSL R5-0345]",<br/> "cazy 686529466 gb AIQ40165.1  glycosidase [Paenibacillus sp. FSL R5-0912]",<br/> "cazy 686535316 gb AIQ46014.1  glycosidase [Paenibacillus sp. FSL R7-0273]",<br/> "cazy 686536683 gb AIQ47381.1  glycosidase [Paenibacillus sp. FSL R7-0273]",<br/> "cazy 686542214 gb AIQ52911.1  glycosidase [Paenibacillus sp. FSL R7-0331]",<br/> "cazy 686540928 gb AIQ51625.1  glycosidase [Paenibacillus sp. FSL R7-0331]",<br/> "cazy 991824680 gb AMF93029.1  glycosidase [Vibrio fluvialis]",<br/> "cazy 315181851 gb ADT88764.1  glycosidase PH1107-like protein [Vibrio furnissii NCTC 11218]"]</p> |

|                                                                                                                                                                                                                                                                                                                                                                                                                                                                                                                                                                                                                                                                                                                                                                                                                                                                                                                                                                                                                                                                                                                                                                                                                                                                                                                                                                                                                                                                                                                                                                                                                                                                                                                                                                                                                                                                                                                                                                                                                                                                                                                                                                                                                                                                                                                                                                                                                                                                                                                                                      |
|------------------------------------------------------------------------------------------------------------------------------------------------------------------------------------------------------------------------------------------------------------------------------------------------------------------------------------------------------------------------------------------------------------------------------------------------------------------------------------------------------------------------------------------------------------------------------------------------------------------------------------------------------------------------------------------------------------------------------------------------------------------------------------------------------------------------------------------------------------------------------------------------------------------------------------------------------------------------------------------------------------------------------------------------------------------------------------------------------------------------------------------------------------------------------------------------------------------------------------------------------------------------------------------------------------------------------------------------------------------------------------------------------------------------------------------------------------------------------------------------------------------------------------------------------------------------------------------------------------------------------------------------------------------------------------------------------------------------------------------------------------------------------------------------------------------------------------------------------------------------------------------------------------------------------------------------------------------------------------------------------------------------------------------------------------------------------------------------------------------------------------------------------------------------------------------------------------------------------------------------------------------------------------------------------------------------------------------------------------------------------------------------------------------------------------------------------------------------------------------------------------------------------------------------------|
| "cazy 1042390253 gb ANQ24660.1  glycosidase [Vibrio natriegens]"                                                                                                                                                                                                                                                                                                                                                                                                                                                                                                                                                                                                                                                                                                                                                                                                                                                                                                                                                                                                                                                                                                                                                                                                                                                                                                                                                                                                                                                                                                                                                                                                                                                                                                                                                                                                                                                                                                                                                                                                                                                                                                                                                                                                                                                                                                                                                                                                                                                                                     |
| ["cazy AOZ96976.1 glycoside hydrolase GH130 family [Butyrivibrio hungatei]",<br>"cazy ASU28436.1 glycosidase [Blautia coxoides]",<br>"humangut MH0193_GL0151565 [gene] locus=scaffold48753_8:30007:31176:+ [Complete] codon-table.11",<br>"humangut MH0286_GL0027030 [gene] locus=scaffold1827_12:788:1957:+ [Complete] codon-table.11",<br>"humangut O2_UC8-1_GL0175915 [gene] locus=scaffold27462_4:5020:6189:+ [Complete] codon-table.11",<br>"humangut V1_CD25-4_GL0125785 [gene] locus=scaffold1855_23:471:1640:- [Complete] codon-table.11",<br>"humangut V1_CD55-0_GL0019722 [gene] locus=scaffold99650_1:145:1314:- [Complete] codon-table.11",<br>"mouse MC-0-1_GL0116189 [gene] locus=scaffold99096_2:7600:8769:+ [Complete] codon-table.11",<br>"mouse MC-6-5_GL0126806 [gene] locus=scaffold97032_1:2216:3385:- [Complete] codon-table.11",<br>"mouse 26_GL0143937 [gene] locus=scaffold53671_2:1130:2299:- [Complete] codon-table.11",<br>"mouse 29_GL0004044 [gene] locus=scaffold98111_2:2151:3320:- [Complete] codon-table.11",<br>"mouse 6-3_GL0066401 [gene] locus=scaffold85639_4:2267:3436:+ [Complete] codon-table.11",<br>"mouse 8-1_GL0089436 [gene] locus=scaffold42344_7:2435:3604:- [Complete] codon-table.11",<br>"pig PIG_140_GL0075906 [gene] locus=scaffold120029_9:1040:2209:+ [Complete] codon-table.11",<br>"pig PIG_167_GL0213461 [gene] locus=scaffold59379_3:3:1169:- [Lack 3'-end] codon-table.11",<br>"pig PIG_192_GL0047528 [gene] locus=scaffold19611_5:411:1580:- [Complete] codon-table.11",<br>"pig PIG-001_GL0169553 [gene] locus=scaffold31187_9:1236:2405:+ [Complete] codon-table.11",<br>"rumen 553_GL0620793_1 [gene] locus=scaffold430590_1:66040:67209:+[Complete]",<br>"rumen 553_GL0720166_1 [gene] locus=scaffold70501_1:1602:2771:+[Complete]",<br>"rumen 583_GL0267624_1 [gene] locus=scaffold337529_1:5774:6943:-[Complete]",<br>"rumen 583_GL0281287_1 [gene] locus=scaffold149356_5:1144:2313:+[Complete]",<br>"rumen 583_GL0726185_1 [gene] locus=scaffold1286_4:100582:101751:-[Complete]",<br>"rumen 554_GL1011952_1 [gene] locus=scaffold1761809_1:1001:2170:-[Complete]",<br>"rumen 555_GL1294657_1 [gene] locus=scaffold755112_1:10663:11832:-[Complete]",<br>"rumen 0081_GL0043449_1 [gene] locus=scaffold1608509_3:795:1964:+[Complete]",<br>"rumen 0081_GL1055791_1 [gene] locus=scaffold452820_5:1601:2770:-[Complete]",<br>"rumen 100058_GL1310035_1 [gene] locus=scaffold2492651_1:2805:3974:-[Complete]",<br>"cazy 1045290883 gb ANU75633.1  glycosidase [Blautia sp. YL58]" |
| ["cazy APC39749.1 glycosidase [Clostridium estertheticum subsp. estertheticum]",<br>"cazy AST56548.1 4-O-beta-D-mannosyl-D-glucose phosphorylase [Thermoanaerobacterium thermosaccharolyticum]",<br>"cazy 389570925 gb AFK87330.1  glycosidase related protein [Thermoanaerobacterium saccharolyticum JW/SL-YS485]",<br>"cazy 302778862 gb ADL69421.1  glycosidase-related [Thermoanaerobacterium thermosaccharolyticum DSM 571]",<br>"cazy 433293730 gb AGB19552.1  putative glycosylase [Thermoanaerobacterium thermosaccharolyticum M0795]"                                                                                                                                                                                                                                                                                                                                                                                                                                                                                                                                                                                                                                                                                                                                                                                                                                                                                                                                                                                                                                                                                                                                                                                                                                                                                                                                                                                                                                                                                                                                                                                                                                                                                                                                                                                                                                                                                                                                                                                                       |
| ["cazy APO42890.1 glycosidase [Paenibacillus xylanexedens]",<br>"cazy 954043270 gb ALP37035.1  glycosidase [Paenibacillus sp. IHB B 3084]"                                                                                                                                                                                                                                                                                                                                                                                                                                                                                                                                                                                                                                                                                                                                                                                                                                                                                                                                                                                                                                                                                                                                                                                                                                                                                                                                                                                                                                                                                                                                                                                                                                                                                                                                                                                                                                                                                                                                                                                                                                                                                                                                                                                                                                                                                                                                                                                                           |
| ["cazy APS38170.1 glycosidase [Salegentibacter sp. T436]"                                                                                                                                                                                                                                                                                                                                                                                                                                                                                                                                                                                                                                                                                                                                                                                                                                                                                                                                                                                                                                                                                                                                                                                                                                                                                                                                                                                                                                                                                                                                                                                                                                                                                                                                                                                                                                                                                                                                                                                                                                                                                                                                                                                                                                                                                                                                                                                                                                                                                            |
| ["cazy APU99346.1 glycosidase [Sphingobacterium sp. B29]"                                                                                                                                                                                                                                                                                                                                                                                                                                                                                                                                                                                                                                                                                                                                                                                                                                                                                                                                                                                                                                                                                                                                                                                                                                                                                                                                                                                                                                                                                                                                                                                                                                                                                                                                                                                                                                                                                                                                                                                                                                                                                                                                                                                                                                                                                                                                                                                                                                                                                            |
| ["cazy AQW92133.1 glycosidase [Elizabethkingia anophelis]",<br>"cazy AQW95450.1 glycosidase [Elizabethkingia anophelis]",<br>"cazy AQW99478.1 glycosidase [Elizabethkingia anophelis]",<br>"cazy AQX03213.1 glycosidase [Elizabethkingia anophelis]",<br>"cazy AQX51803.1 glycosidase [Elizabethkingia anophelis]",<br>"cazy AQX90026.1 glycosidase [Elizabethkingia anophelis]"                                                                                                                                                                                                                                                                                                                                                                                                                                                                                                                                                                                                                                                                                                                                                                                                                                                                                                                                                                                                                                                                                                                                                                                                                                                                                                                                                                                                                                                                                                                                                                                                                                                                                                                                                                                                                                                                                                                                                                                                                                                                                                                                                                     |

|                                                                                                                                                                                                                                                                                                                                                                                                                                                                                                                                                                                                                                                                                                                                                                                                                                                                                                                                                                        |
|------------------------------------------------------------------------------------------------------------------------------------------------------------------------------------------------------------------------------------------------------------------------------------------------------------------------------------------------------------------------------------------------------------------------------------------------------------------------------------------------------------------------------------------------------------------------------------------------------------------------------------------------------------------------------------------------------------------------------------------------------------------------------------------------------------------------------------------------------------------------------------------------------------------------------------------------------------------------|
| "cazy ASV79344.1 glycosidase [Elizabethkingia anophelis]",<br>"cazy ATC35185.1 glycosidase [Elizabethkingia anophelis R26]",<br>"cazy ATC38825.1 glycosidase [Elizabethkingia anophelis Ag1]",<br>"cazy ATC42505.1 glycosidase [Elizabethkingia anophelis]",<br>"cazy ATC46181.1 glycosidase [Elizabethkingia anophelis]",<br>"cazy AVF48890.1 glycosidase [Elizabethkingia anophelis]",<br>"cazy AVF52886.1 glycosidase [Elizabethkingia anophelis]",<br>"cazy 1016605842 gb AMX50912.1  glycosidase [Elizabethkingia anophelis]",<br>"cazy 1008914382 gb AMR40816.1  glycosidase [Elizabethkingia anophelis]",<br>"cazy 1016609514 gb AMX54304.1  glycosidase [Elizabethkingia anophelis]",<br>"cazy 1016602155 gb AMX47452.1  glycosidase [Elizabethkingia anophelis]",<br>"cazy 822872393 gb AKH94617.1  glycosidase [Elizabethkingia anophelis FMS-007]",<br>"cazy 675104779 gb AIL46072.1  putative glycoside hydrolase [Elizabethkingia anophelis NUHP1]"       |
| ["cazy AQX07236.1 glycosidase [Elizabethkingia ursingii]",<br>"cazy AQX84721.1 glycosidase [Elizabethkingia bruuniana]",<br>"cazy ATL42876.1 glycosidase [Elizabethkingia miricola]",<br>"cazy 769869649 gb AJW61891.1  4-O-beta-D-mannosyl-D-glucose phosphorylase [Elizabethkingia miricola]"]                                                                                                                                                                                                                                                                                                                                                                                                                                                                                                                                                                                                                                                                       |
| ["cazy ARK12512.1 glycosidase [Fibrella sp. ES10-3-2-2]"]                                                                                                                                                                                                                                                                                                                                                                                                                                                                                                                                                                                                                                                                                                                                                                                                                                                                                                              |
| ["cazy ASA19953.1 glycosidase [Paenibacillus donghaensis]"]                                                                                                                                                                                                                                                                                                                                                                                                                                                                                                                                                                                                                                                                                                                                                                                                                                                                                                            |
| ["cazy ASB48953.1 glycosidase [Alkalitalea saponilacus]"]                                                                                                                                                                                                                                                                                                                                                                                                                                                                                                                                                                                                                                                                                                                                                                                                                                                                                                              |
| ["cazy ASM65030.1 glycosidase [Bacteroides caccae",<br>"humangutMH0013_GL0010528 [gene] locus=scaffold807_4:10769:11968:+ [Complete] codon-table.11"]                                                                                                                                                                                                                                                                                                                                                                                                                                                                                                                                                                                                                                                                                                                                                                                                                  |
| ["cazy ASU33410.1 glycosidase [Mucilagibacter sp. BJC16-A31]",<br>"cazy 379654489 gb AFD07545.1  putative glycosylase [Solitalea canadensis DSM 3403]"]                                                                                                                                                                                                                                                                                                                                                                                                                                                                                                                                                                                                                                                                                                                                                                                                                |
| ["cazy ATL47767.1 glycosidase [Chitinophaga caeni]"]                                                                                                                                                                                                                                                                                                                                                                                                                                                                                                                                                                                                                                                                                                                                                                                                                                                                                                                   |
| ["cazy AUS97049.1 glycosidase [Pseudoclostridium thermosuccinogenes]"]                                                                                                                                                                                                                                                                                                                                                                                                                                                                                                                                                                                                                                                                                                                                                                                                                                                                                                 |
| ["cazy AVM54084.1 glycosidase [Bacteroides zoogloformans]",<br>"humangutT2D-135A_GL0111577 [gene] locus=scaffold23013_2:18227:19411:- [Complete] codon-table.11",<br>"mouse1A-dyr2-07_GL0081301 [gene] locus=scaffold10432_2:43704:44888:+ [Complete] codon-table.11",<br>"pigPIG_164_GL0141403 [gene] locus=scaffold38986_1:1:1185:+ [Lack 5'-end] codon-table.11",<br>"pigPIG-032_GL0049834 [gene] locus=scaffold19392_27:2:1186:+ [Lack 5'-end] codon-table.11",<br>"rumen552_GL1114630_1 [gene] locus=scaffold712100_1:12124:13308:-[Complete]",<br>"rumen552_GL1143618_1 [gene] locus=scaffold29684_2:1363:2547:-[Complete]",<br>"rumen554_GL0725053_1 [gene] locus=scaffold2187960_1:7:1191:-[Complete]",<br>"rumen0081_GL0541184_1 [gene] locus=scaffold699814_1:12309:13493:+[Complete]",<br>"rumen100058_GL1537500_1 [gene] locus=scaffold12501_3:2673:3857:+[Complete]",<br>"rumen2009040_GL3289829_1 [gene] locus=scaffold780654_4:9276:10460:+[Complete]"] |
| ["cazy AVM58814.1 glycosidase [Bacteroides heparinolyticus]",<br>"humangutMH0003_GL0073593 [gene] locus=scaffold9631_2:15512:16690:- [Complete] codon-table.11",<br>"humangutMH0011_GL0024617 [gene] locus=scaffold24322_8:1613:2791:- [Complete] codon-table.11",<br>"humangutMH0026_GL0049629 [gene] locus=scaffold14722_2:1362:2540:- [Complete] codon-table.11",<br>"humangutMH0028_GL0037958 [gene] locus=scaffold35126_2:889:2067:+ [Complete] codon-table.11",<br>"humangutMH0047_GL0029507 [gene] locus=scaffold8414_1:15652:16830:- [Complete] codon-table.11",<br>"humangutMH0113_GL0004360 [gene] locus=scaffold75803_5:9495:10673:- [Complete] codon-table.11",                                                                                                                                                                                                                                                                                            |

|                                                                                                                                                                                      |
|--------------------------------------------------------------------------------------------------------------------------------------------------------------------------------------|
| "humangutMH0114_GL0053775 [gene] locus=scaffold56431_1:4880:6058:- [Complete] codon-table.11",                                                                                       |
| "humangutMH0302_GL0099631 [gene] locus=scaffold9392_6:4002:5180:+ [Complete] codon-table.11",                                                                                        |
| "humangutMH0309_GL0054284 [gene] locus=scaffold4630_4:9523:10701:+ [Complete] codon-table.11",                                                                                       |
| "humangutMH0407_GL0070133 [gene] locus=scaffold73610_5:6747:7925:- [Complete] codon-table.11",                                                                                       |
| "humangutO2.UC24-2_GL0054273 [gene] locus=scaffold9775_18:4301:5479:- [Complete] codon-table.11",                                                                                    |
| "humangutO2.UC58-2_GL0152937 [gene] locus=scaffold3330_6:542:1720:- [Complete] codon-table.11",                                                                                      |
| "humangutV1.F135_GL0086344 [gene] locus=scaffold16157_6:165:1343:- [Complete] codon-table.11",                                                                                       |
| "humangutNOF013_GL0042737 [gene] locus=scaffold16252_2:138513:139691:+ [Complete] codon-table.11",                                                                                   |
| "humangutN085A_GL0065524 [gene] locus=scaffold44823_1:37093:38271:+ [Complete] codon-table.11",                                                                                      |
| "humangutT2D-48A_GL0083972 [gene] locus=scaffold18493_2:18681:19859:- [Complete] codon-table.11",                                                                                    |
| "mouseG1-1A_GL0110639 [gene] locus=scaffold85753_1:20501:21679:+ [Complete] codon-table.11",                                                                                         |
| "mouseGroup2-3A_GL0160146 [gene] locus=scaffold102179_3:1524:2702:- [Complete] codon-table.11",                                                                                      |
| "mouse10_GL0081707 [gene] locus=scaffold41461_1:46211:47389:+ [Complete] codon-table.11",                                                                                            |
| "mouse10_GL0091204 [gene] locus=C801888_1:7411:8589:+ [Complete] codon-table.11",                                                                                                    |
| "mouse1A-dyr2-07_GL0066252 [gene] locus=scaffold13599_3:9593:10771:- [Complete] codon-table.11",                                                                                     |
| "pigPIG-031_GL0115019 [gene] locus=scaffold144823_1:761:1939:+ [Complete] codon-table.11",                                                                                           |
| "pigPIG-036_GL0021257 [gene] locus=scaffold156299_5:1816:2994:- [Complete] codon-table.11",                                                                                          |
| "rumen554_GL2845194_1 [gene] locus=scaffold34491_2:1193:2371:+[Complete]",                                                                                                           |
| "rumen555_GL0766667_1 [gene] locus=scaffold209228_1:23209:24387:+[Complete]",                                                                                                        |
| "cazygi 939201095 gb ALJ59268.1  4-O-beta-D-mannosyl-D-glucose phosphorylase [Bacteroides cellulosilyticus]",                                                                        |
| "cazygi 319415146 gb ADV42257.1  glycosidase related protein [Bacteroides helcogenes P 36-108]",                                                                                     |
| "cazygi 149931592 gb ABR38290.1  conserved hypothetical protein [Bacteroides vulgatus ATCC 8482]",                                                                                   |
| "cazygi 941509130 gb ALK82665.1  Glycosidase-like Protein [Bacteroides vulgatus]",                                                                                                   |
| "cazygi 294472386 gb ADE81775.1  conserved hypothetical protein [Prevotella ruminicola 23"]                                                                                          |
| ["cazy AVR44603.1 glycosidase [Gramella sp. SH35]"]                                                                                                                                  |
| ["cazy AWB46384.1 glycosidase [Paenibacillus sp. CAA11]"]                                                                                                                            |
| "humangutMH0277_GL0018625 [gene] locus=scaffold4297_3:1193:2371:+ [Complete] codon-table.11",                                                                                        |
| "humangutMH0277_GL0036178 [gene] locus=scaffold6836_3:42511:43689:+ [Complete] codon-table.11",                                                                                      |
| "humangutDOF004_GL0062857 [gene] locus=scaffold19413_12:6329:7507:- [Complete] codon-table.11",                                                                                      |
| "cazygi 1031373314 gb ANF96696.1  glycosidase [Paenibacillus bovis]"                                                                                                                 |
| ["cazy AWB65989.1 glycosidase [Catenovulum sp. CCB-QB4]"]                                                                                                                            |
| ["cazy AWG26847.1 glycosidase [Flavobacterium kingsejongi]"                                                                                                                          |
| ["cazy AWM35262.1 glycosidase [Hymenobacter nivis]"                                                                                                                                  |
| ["cazy AXB29279.1 glycosidase [Faecalibacterium prausnitzii]",                                                                                                                       |
| "humangutMH0004_GL0022947 [gene] locus=scaffold4876_6:5755:6945:+ [Complete] codon-table.11",                                                                                        |
| "humangutMH0143_GL0066610 [gene] locus=scaffold10045_5:67698:68888:- [Complete] codon-table.11",                                                                                     |
| "humangutMH0233_GL0007868 [gene] locus=scaffold65_1:7044:8234:- [Complete] codon-table.11",                                                                                          |
| "humangut706846339-stool1_revised_scaffold23726_3_gene129107 strand:- start:1014 stop:2204 length:1191 start_codon:yes stop_codon:yes gene_type:complete [Complete] codon-table.11", |
| "mouseMC-6-1_GL0107987 [gene] locus=scaffold75276_1:4575:5765:- [Complete] codon-table.11",                                                                                          |
| "mouse10_GL0064298 [gene] locus=scaffold8820_2:15495:16685:- [Complete] codon-table.11",                                                                                             |
| "pigPIG-173_GL0143313 [gene] locus=scaffold157290_1:3:1193:+ [Lack 5'-end] codon-table.11",                                                                                          |
| "pigPIG-019_GL0065321 [gene] locus=scaffold11801_1:514:1704:+ [Complete] codon-table.11",                                                                                            |
| "pigPIG-080_GL0106426 [gene] locus=scaffold141193_3:546:1736:+ [Complete] codon-table.11",                                                                                           |

|                                                                                                                                                                                                                                                                                                                                                                                                                                                                                                                                                                                                                                                                                                                                                                                                                                                                                                                                                                                                                                                                                                                                                                                                                                                                                                                                                                                                                                                                                                                                                                                                                                                                                                                                                                                                                                                                                                                                                                                                                                                                                                                                                                                                                                                                                                                                                                                                                                                                                                                                                                                                                                                                                                                                                                                                                                                                                                                                                                                                                                                                                                                                                                                                           |
|-----------------------------------------------------------------------------------------------------------------------------------------------------------------------------------------------------------------------------------------------------------------------------------------------------------------------------------------------------------------------------------------------------------------------------------------------------------------------------------------------------------------------------------------------------------------------------------------------------------------------------------------------------------------------------------------------------------------------------------------------------------------------------------------------------------------------------------------------------------------------------------------------------------------------------------------------------------------------------------------------------------------------------------------------------------------------------------------------------------------------------------------------------------------------------------------------------------------------------------------------------------------------------------------------------------------------------------------------------------------------------------------------------------------------------------------------------------------------------------------------------------------------------------------------------------------------------------------------------------------------------------------------------------------------------------------------------------------------------------------------------------------------------------------------------------------------------------------------------------------------------------------------------------------------------------------------------------------------------------------------------------------------------------------------------------------------------------------------------------------------------------------------------------------------------------------------------------------------------------------------------------------------------------------------------------------------------------------------------------------------------------------------------------------------------------------------------------------------------------------------------------------------------------------------------------------------------------------------------------------------------------------------------------------------------------------------------------------------------------------------------------------------------------------------------------------------------------------------------------------------------------------------------------------------------------------------------------------------------------------------------------------------------------------------------------------------------------------------------------------------------------------------------------------------------------------------------------|
| <p>"pigPIG-101_GL0023438 [gene] locus=scaffold56096_1:34:1224:- [Complete] codon-table.11",</p> <p>"rumen552_GL0517600_1 [gene] locus=scaffold11542_8:5683:6873:+[Complete]",</p> <p>"rumen554_GL1856714_1 [gene] locus=scaffold2142401_1:2198:3388:+[Complete]",</p> <p>"cazygi 295104426 emb CBL01970.1  Predicted glycosylase [Faecalibacterium prausnitzii SL3/3]"</p>                                                                                                                                                                                                                                                                                                                                                                                                                                                                                                                                                                                                                                                                                                                                                                                                                                                                                                                                                                                                                                                                                                                                                                                                                                                                                                                                                                                                                                                                                                                                                                                                                                                                                                                                                                                                                                                                                                                                                                                                                                                                                                                                                                                                                                                                                                                                                                                                                                                                                                                                                                                                                                                                                                                                                                                                                                |
| <p>["cazy AXE17606.1 glycosidase [Runella sp. HYN0085]"]</p>                                                                                                                                                                                                                                                                                                                                                                                                                                                                                                                                                                                                                                                                                                                                                                                                                                                                                                                                                                                                                                                                                                                                                                                                                                                                                                                                                                                                                                                                                                                                                                                                                                                                                                                                                                                                                                                                                                                                                                                                                                                                                                                                                                                                                                                                                                                                                                                                                                                                                                                                                                                                                                                                                                                                                                                                                                                                                                                                                                                                                                                                                                                                              |
| <p>["cazy AXG75195.1 glycosidase [Flavobacterium arcticum]",</p> <p>"cazy AYO56875.1 glycosidase [Chryseobacterium sp. 6424]"</p>                                                                                                                                                                                                                                                                                                                                                                                                                                                                                                                                                                                                                                                                                                                                                                                                                                                                                                                                                                                                                                                                                                                                                                                                                                                                                                                                                                                                                                                                                                                                                                                                                                                                                                                                                                                                                                                                                                                                                                                                                                                                                                                                                                                                                                                                                                                                                                                                                                                                                                                                                                                                                                                                                                                                                                                                                                                                                                                                                                                                                                                                         |
| <p>["cazy AXP79811.1 4-O-beta-D-mannosyl-D-glucose phosphorylase [Mariniflexile sp. TRM1-10]"</p>                                                                                                                                                                                                                                                                                                                                                                                                                                                                                                                                                                                                                                                                                                                                                                                                                                                                                                                                                                                                                                                                                                                                                                                                                                                                                                                                                                                                                                                                                                                                                                                                                                                                                                                                                                                                                                                                                                                                                                                                                                                                                                                                                                                                                                                                                                                                                                                                                                                                                                                                                                                                                                                                                                                                                                                                                                                                                                                                                                                                                                                                                                         |
| <p>["cazy AXT62365.1 glycosidase [Aquimarina sp. AD10]"</p>                                                                                                                                                                                                                                                                                                                                                                                                                                                                                                                                                                                                                                                                                                                                                                                                                                                                                                                                                                                                                                                                                                                                                                                                                                                                                                                                                                                                                                                                                                                                                                                                                                                                                                                                                                                                                                                                                                                                                                                                                                                                                                                                                                                                                                                                                                                                                                                                                                                                                                                                                                                                                                                                                                                                                                                                                                                                                                                                                                                                                                                                                                                                               |
| <p>["cazy AXV50322.1 glycosidase [Prevotella denticola]",</p> <p>"humangutV1_UC43-0_GL0082855 [gene] locus=scaffold13620_3:17502:18665:+ [Complete] codon-table.11",</p> <p>"mouseMC-0-1_GL0111200 [gene] locus=scaffold96950_3:7683:8846:- [Complete] codon-table.11",</p> <p>"pigPIG-137_GL0180063 [gene] locus=scaffold98100_2:487:1650:+ [Complete] codon-table.11",</p> <p>"pigPIG-022_GL0171437 [gene] locus=scaffold94455_3:857:2020:+ [Complete] codon-table.11",</p> <p>"pigPIG-030_GL0025138 [gene] locus=scaffold46777_11:3786:4949:- [Complete] codon-table.11",</p> <p>"pigPIG-041_GL0094226 [gene] locus=scaffold16_4:3117:4280:+ [Complete] codon-table.11",</p> <p>"pigPIG-041_GL0118777 [gene] locus=scaffold5184_7:1860:3023:- [Complete] codon-table.11",</p> <p>"pigPIG-071_GL0029070 [gene] locus=scaffold42364_1:7020:8183:- [Complete] codon-table.11",</p> <p>"pigBHZ-5B_GL0002271 [gene] locus=scaffold188566_1:138:1301:+ [Complete] codon-table.11",</p> <p>"pigBHZ-8B_GL0185313 [gene] locus=scaffold85542_5:1826:2991:- [Complete] codon-table.11",</p> <p>"pigDB-11B_GL0197709 [gene] locus=scaffold158518_2_1:21:1184:- [Complete] codon-table.11",</p> <p>"pigDB-512B_GL0024780 [gene] locus=scaffold100436_3:8755:9918:- [Complete] codon-table.11",</p> <p>"pigEYZ-378B_GL0053124 [gene] locus=scaffold100833_1:345:1508:+ [Complete] codon-table.11",</p> <p>"rumen553_GL0133960_1 [gene] locus=scaffold919_2:5650:6813:-[Complete]",</p> <p>"rumen553_GL0582149_1 [gene] locus=scaffold185_1.8064:9227:-[Complete]",</p> <p>"rumen553_GL0881969_1 [gene] locus=scaffold352799_3:13055:14218:-[Complete]",</p> <p>"rumen552_GL1114230_1 [gene] locus=scaffold306738_4:5283:6446:+[Complete]",</p> <p>"rumen552_GL1191325_1 [gene] locus=scaffold562209_3:1804:2967:+[Complete]",</p> <p>"rumen552_GL1475824_1 [gene] locus=scaffold419564_1:6005:7168:-[Complete]",</p> <p>"rumen552_GL1488809_1 [gene] locus=scaffold1115241_1:15561:16724:+[Complete]",</p> <p>"rumen552_GL1624036_1 [gene] locus=scaffold1093134_1:2605:3768:+[Complete]",</p> <p>"rumen554_GL0507290_1 [gene] locus=scaffold500042_1:3713:4876:-[Complete]",</p> <p>"rumen554_GL0829376_1 [gene] locus=scaffold2126898_1:3195:4358:-[Complete]",</p> <p>"rumen554_GL0886475_1 [gene] locus=scaffold49808_1:1162:2325:+[Complete]",</p> <p>"rumen554_GL1771620_1 [gene] locus=scaffold1542404_8:2001:3164:+[Complete]",</p> <p>"rumen554_GL1982279_1 [gene] locus=scaffold373070_2:8720:9883:+[Complete]",</p> <p>"rumen554_GL2030663_1 [gene] locus=scaffold896637_3:13:1176:-[Complete]",</p> <p>"rumen554_GL2072226_1 [gene] locus=scaffold14762_1:838:2001:-[Complete]",</p> <p>"rumen554_GL2151294_1 [gene] locus=scaffold518530_1:5283:6446:+[Complete]",</p> <p>"rumen554_GL2564007_1 [gene] locus=scaffold198438_1:3857:5020:-[Complete]",</p> <p>"rumen554_GL2594225_1 [gene] locus=scaffold1010330_2:4365:5528:+[Complete]",</p> <p>"rumen554_GL3098497_1 [gene] locus=scaffold531699_3:57:1220:+[Complete]",</p> <p>"rumen555_GL0508198_1 [gene] locus=scaffold1040298_1:374:1537:-[Complete]",</p> <p>"rumen555_GL0767275_1 [gene] locus=scaffold869588_1:14421:15584:-[Complete]",</p> |

|                                                                                                          |
|----------------------------------------------------------------------------------------------------------|
| "rumen555_GL1143495_1 [gene] locus=scaffold1157453_1:3814:4977:-[Complete]",                             |
| "rumen555_GL2114163_1 [gene] locus=scaffold320623_3:3616:4779:-[Complete]",                              |
| "rumen555_GL2188078_1 [gene] locus=scaffold991361_1:1446:2609:+[Complete]",                              |
| "rumen0081_GL0218905_1 [gene] locus=scaffold1066063_2:196:1359:-[Complete]",                             |
| "rumen0081_GL0377878_1 [gene] locus=scaffold650509_1:1629:2792:-[Complete]",                             |
| "rumen0081_GL1244966_1 [gene] locus=scaffold579866_1:762:1925:+[Complete]",                              |
| "rumen0081_GL1262434_1 [gene] locus=scaffold631150_1:3088:4251:-[Complete]",                             |
| "rumen0081_GL1404169_1 [gene] locus=C39889247_1:575:1738:+[Complete]",                                   |
| "rumen0081_GL1498948_1 [gene] locus=scaffold832430_1:688:1851:-[Lack 5'-end]",                           |
| "rumen0081_GL1680436_1 [gene] locus=scaffold825235_1:479:1642:-[Complete]",                              |
| "rumen100058_GL0753127_1 [gene] locus=scaffold94941_2:493:1656:-[Complete]",                             |
| "rumen100058_GL1356880_1 [gene] locus=scaffold1598668_2:2287:3450:+[Complete]",                          |
| "rumen100058_GL1414813_1 [gene] locus=scaffold1508233_4:2402:3565:-[Complete]",                          |
| "rumen100058_GL2113642_1 [gene] locus=scaffold1278622_3:2077:3240:+[Complete]",                          |
| "rumen100058_GL2560527_1 [gene] locus=scaffold832542_1:58:1221:-[Lack 5'-end]",                          |
| "rumen100058_GL2603941_1 [gene] locus=scaffold361223_9:4745:5908:-[Complete]",                           |
| "rumen100058_GL3499349_1 [gene] locus=C60815319_1:6495:7658:-[Complete]",                                |
| "rumen2009040_GL0248720_1 [gene] locus=scaffold1342030_1:1638:2801:+[Complete]",                         |
| "rumen2009040_GL1699258_1 [gene] locus=scaffold78944_1:5788:6951:+[Complete]",                           |
| "rumen2009040_GL1981669_1 [gene] locus=scaffold711804_1:4897:6060:-[Complete]",                          |
| "rumen2009040_GL3563154_1 [gene] locus=scaffold1311966_1:2321:3484:-[Complete]",                         |
| "rumen3042_GL0439631_1 [gene] locus=scaffold1215104_4:1333:2496:+[Complete]",                            |
| "rumen3042_GL0447709_1 [gene] locus=scaffold734523_2:693:1856:+[Complete]",                              |
| "rumen3042_GL1687329_1 [gene] locus=scaffold707710_2:31:1194:+[Complete]",                               |
| "rumen3042_GL2089833_1 [gene] locus=scaffold580603_1:2351:3514:+[Complete]",                             |
| "rumen7049_GL2274324_1 [gene] locus=scaffold1348347_1:7324:8487:+[Complete]",                            |
| "cazygi 326944448 gb AEA20333.1  hypothetical protein HMPREF9137_1951 [Prevotella denticola F0289]"      |
| ["cazy AXY73908.1 glycosidase [Pseudoflavitalea sp. 5GH32-13]"]                                          |
| ["cazy AYD47090.1 glycosidase [Arachidicoccus sp. KIS59-12]"]                                            |
| ["cazy AYL94098.1 glycosidase [Mucilagibacter sp. HYN0043]"]                                             |
| ["cazy AYQ73088.1 glycosidase [Cohnella sp. 18JY8-7]"]                                                   |
| ["cazy BAX79320.1 glycosidase [Marinifilaceae bacterium SPP2]"]                                          |
| ["cazy SCD21900.1 4-O-beta-D-mannosyl-D-glucose phosphorylase [Proteiniphilum saccharofermentans]",      |
| "humangutMH0381_GL0150559 [gene] locus=scaffold92566_2:2289:3470:- [Complete] codon-table.11",           |
| "humangutDOM005_GL0042972 [gene] locus=scaffold6931_3:20973:22154:+ [Complete] codon-table.11",          |
| "humangutT2D-113A_GL0104331 [gene] locus=scaffold12978_1:30168:31349:- [Complete] codon-table.11",       |
| "humangut457424.BFAG_00180 [Complete]:- codon-table.11",                                                 |
| "cazygi 697634431 emb CEA16908.1  4-O-beta-D-mannosyl-D-glucose phosphorylase [Fermentimonas caenicola]" |
| ["cazy SCV07061.1 hypothetical protein BACOV975_00817 [Bacteroides ovatus V975]",                        |
| "humangutMH0006_GL0115594 [gene] locus=scaffold224052_1:1361:2530:+ [Complete] codon-table.11",          |
| "humangutMH0020_GL0011935 [gene] locus=scaffold3989_1:7411:8580:- [Complete] codon-table.11",            |
| "humangutMH0287_GL0079244 [gene] locus=scaffold3631_2:1928:3097:- [Complete] codon-table.11",            |
| "humangutMH0363_GL0030758 [gene] locus=scaffold89062_1:4745:5914:+ [Complete] codon-table.11",           |
| "humangutNOF013_GL0050747 [gene] locus=scaffold5482_39:1583:2752:- [Complete] codon-table.11",           |

|                                                                                                                                                                                                                                                                                                                                                                                                                                                                                                                                                                                                                                                                                                                                                                                                                                                                                                                                                                                                                                                                                                                                                                                                                                                                                                                                                                                                                                                                                                                                           |
|-------------------------------------------------------------------------------------------------------------------------------------------------------------------------------------------------------------------------------------------------------------------------------------------------------------------------------------------------------------------------------------------------------------------------------------------------------------------------------------------------------------------------------------------------------------------------------------------------------------------------------------------------------------------------------------------------------------------------------------------------------------------------------------------------------------------------------------------------------------------------------------------------------------------------------------------------------------------------------------------------------------------------------------------------------------------------------------------------------------------------------------------------------------------------------------------------------------------------------------------------------------------------------------------------------------------------------------------------------------------------------------------------------------------------------------------------------------------------------------------------------------------------------------------|
| <p>"rumen553_GL0235336_1 [gene] locus=scaffold183563_1:612:1781:+[Complete]",</p> <p>"cazygii 938483432 gb ALJ47663.1  4-O-beta-D-mannosyl-D-glucose phosphorylase [Bacteroides ovatus]",</p> <p>"cazygii 295085672 emb CBK67195.1  Predicted glycosylase [Bacteroides xylanisolvens XB1A]"</p>                                                                                                                                                                                                                                                                                                                                                                                                                                                                                                                                                                                                                                                                                                                                                                                                                                                                                                                                                                                                                                                                                                                                                                                                                                           |
| <p>["cazy SDS23678.1 4-O-beta-D-mannosyl-D-glucose phosphorylase [Mucilaginibacter mallensis]",</p> <p>"cazygii 336306901 gb AEI50003.1  glycosidase related protein [Runella slithyiformis DSM 19594]"</p>                                                                                                                                                                                                                                                                                                                                                                                                                                                                                                                                                                                                                                                                                                                                                                                                                                                                                                                                                                                                                                                                                                                                                                                                                                                                                                                               |
| <p>["cazy SjX74203.1 COG2152 predicted glycoside hydrolase [feces metagenome]",</p> <p>"mouseS-Fe10_GL0077674 [gene] locus=scaffold2319_4:16598:17755:+ [Complete] codon-table.11",</p> <p>"pigPIG-012_GL0198868 [gene] locus=scaffold175149_1:15138:16295:- [Complete] codon-table.11",</p> <p>"rumen554_GL1874810_1 [gene] locus=scaffold55901_2:3151:4308:-[Complete]",</p> <p>"rumen100058_GL1181547_1 [gene] locus=scaffold2365842_1:241:1398:+[Complete]",</p> <p>"rumen2009040_GL2571842_1 [gene] locus=scaffold1302178_1:1404:2561:-[Complete]"</p>                                                                                                                                                                                                                                                                                                                                                                                                                                                                                                                                                                                                                                                                                                                                                                                                                                                                                                                                                                               |
| <p>["cazy SNX52632.1 4-O-beta-D-mannosyl-D-glucose phosphorylase [Thermoanaerobacterium sp. RBlITD]",</p> <p>"humangutMH0055_GL0070815 [gene] locus=scaffold34778_2:597:1778:+ [Complete] codon-table.11",</p> <p>"humangutMH0135_GL0080937 [gene] locus=scaffold1874_12:3739:4920:- [Complete] codon-table.11",</p> <p>"humangutMH0355_GL0026985 [gene] locus=scaffold59455_8:2250:3431:- [Complete] codon-table.11",</p> <p>"humangutO2_UC0_2_GL0081821 [gene] locus=scaffold37505_8:4778:5959:- [Complete] codon-table.11",</p> <p>"mouseMC-0-1_GL0086094 [gene] locus=scaffold75211_2:844:2025:- [Complete] codon-table.11",</p> <p>"mouseG1-1A_GL0008996 [gene] locus=scaffold3859_1:47826:49007:+ [Complete] codon-table.11",</p> <p>"mouse2-1_GL0026532 [gene] locus=scaffold83145_2:20129:21310:- [Complete] codon-table.11",</p> <p>"mouse2-1_GL0100763 [gene] locus=scaffold27245_8:482:1663:- [Complete] codon-table.11",</p> <p>"mouse2-3_GL0035308 [gene] locus=scaffold59252_3:16735:17916:- [Complete] codon-table.11",</p> <p>"mouse6-2_GL0021670 [gene] locus=scaffold52589_2:19565:20746:+ [Complete] codon-table.11",</p> <p>"mouse6-2_GL0056584 [gene] locus=scaffold27523_9:6716:7897:- [Complete] codon-table.11",</p> <p>"pigPIG-017_GL0066822 [gene] locus=scaffold165618_4:1007:2188:- [Complete] codon-table.11",</p> <p>"pigBHZ-11B_GL0063886 [gene] locus=scaffold18158_9:10158:11339:+ [Complete] codon-table.11",</p> <p>"rumen583_GL0572359_1 [gene] locus=scaffold335058_1:125034:126215:-[Complete]"</p> |
| <p>["humangut158458797-stool1_revised_C1254954_1_gene7695 strand:- start:155 stop:670 length:516 start_codon:no stop_codon:yes gene_type:incomplete [Lack 5'-end] codon-table.11"]</p>                                                                                                                                                                                                                                                                                                                                                                                                                                                                                                                                                                                                                                                                                                                                                                                                                                                                                                                                                                                                                                                                                                                                                                                                                                                                                                                                                    |
| <p>["humangut158458797-stool1_revised_C1330728_1_gene57635 strand:+ start:1451 stop:1921 length:471 start_codon:yes stop_codon:no gene_type:incomplete [Lack 3'-end] codon-table.11"]</p>                                                                                                                                                                                                                                                                                                                                                                                                                                                                                                                                                                                                                                                                                                                                                                                                                                                                                                                                                                                                                                                                                                                                                                                                                                                                                                                                                 |
| <p>["humangut158479027-stool1_revised_scaffold21677_1_gene16249 strand:- start:2 stop:565 length:564 start_codon:yes stop_codon:no gene_type:incomplete [Lack 3'-end] codon-table.11"]</p>                                                                                                                                                                                                                                                                                                                                                                                                                                                                                                                                                                                                                                                                                                                                                                                                                                                                                                                                                                                                                                                                                                                                                                                                                                                                                                                                                |
| <p>["humangut158499257-stool2_revised_scaffold66254_1_gene37390 strand:- start:10217 stop:11395 length:1179 start_codon:yes stop_codon:yes gene_type:complete [Complete] codon-table.11"]</p>                                                                                                                                                                                                                                                                                                                                                                                                                                                                                                                                                                                                                                                                                                                                                                                                                                                                                                                                                                                                                                                                                                                                                                                                                                                                                                                                             |
| <p>["humangut158499257-stool2_revised_scaffold72472_1_gene148447 strand:- start:4189 stop:5364 length:1176 start_codon:yes stop_codon:yes gene_type:complete [Complete] codon-table.11",</p> <p>"rumen552_GL0548529_1 [gene] locus=scaffold662837_1:4322:5497:-[Complete]",</p> <p>"rumen555_GL0790964_1 [gene] locus=scaffold697095_7:1021:2196:+[Complete]",</p> <p>"rumen3042_GL0057553_1 [gene] locus=scaffold191918_7:888:2063:+[Complete]",</p> <p>"rumen7049_GL1338943_1 [gene] locus=scaffold1107426_5:618:1793:-[Complete]"</p>                                                                                                                                                                                                                                                                                                                                                                                                                                                                                                                                                                                                                                                                                                                                                                                                                                                                                                                                                                                                  |
| <p>["humangut158802708-stool2_revised_scaffold19713_1_gene128431 strand:- start:813 stop:1223 length:411 start_codon:no stop_codon:yes gene_type:incomplete [Lack 5'-end] codon-table.11"]</p>                                                                                                                                                                                                                                                                                                                                                                                                                                                                                                                                                                                                                                                                                                                                                                                                                                                                                                                                                                                                                                                                                                                                                                                                                                                                                                                                            |
| <p>["humangut158924089-stool1_revised_C357054_1_gene12204 strand:+ start:2 stop:1237 length:1236 start_codon:no stop_codon:yes gene_type:incomplete [Lack 5'-end] codon-table.11"]</p>                                                                                                                                                                                                                                                                                                                                                                                                                                                                                                                                                                                                                                                                                                                                                                                                                                                                                                                                                                                                                                                                                                                                                                                                                                                                                                                                                    |

|                                                                                                                                                                                                                                                                                                                                                                                                                                                                      |
|----------------------------------------------------------------------------------------------------------------------------------------------------------------------------------------------------------------------------------------------------------------------------------------------------------------------------------------------------------------------------------------------------------------------------------------------------------------------|
| <p>["humangut159146620-stool1_revised_scaffold6399_1_gene5753 strand:- start:14096 stop:15346 length:1251 start_codon:yes stop_codon:yes gene_type:complete<br/>[Complete] codon-table.11"]</p>                                                                                                                                                                                                                                                                      |
| <p>["humangut159207311-stool1_revised_scaffold15028_2_gene60096 strand:+ start:98 stop:778 length:681 start_codon:yes stop_codon:no gene_type:incomplete [Lack 3'-end] codon-table.11"]</p>                                                                                                                                                                                                                                                                          |
| <p>["humangut159268001-stool1_revised_scaffold48948_1_gene45850 strand:- start:2 stop:520 length:519 start_codon:yes stop_codon:no gene_type:incomplete [Lack 3'-end] codon-table.11"]</p>                                                                                                                                                                                                                                                                           |
| <p>["humangut159551223-stool1_revised_scaffold14178_1_gene131122 strand:- start:1 stop:546 length:546 start_codon:no stop_codon:no gene_type:incomplete [Lack both ends] codon-table.11",<br/>"rumen2009040_GL2806757_1 [gene] locus=scaffold15187_1:3:548:-[Lack both ends]"]</p>                                                                                                                                                                                   |
| <p>["humangut159551223-stool1_revised_scaffold22239_2_gene117759 strand:- start:2259 stop:2957 length:699 start_codon:no stop_codon:yes gene_type:incomplete [Lack 5'-end] codon-table.11"]</p>                                                                                                                                                                                                                                                                      |
| <p>["humangut159551223-stool1_revised_scaffold22239_3_gene31179 strand:- start:3 stop:440 length:438 start_codon:yes stop_codon:no gene_type:incomplete [Lack 3'-end] codon-table.11"]</p>                                                                                                                                                                                                                                                                           |
| <p>["humangut159551223-stool2_revised_C929707_1_gene3027 strand:+ start:1 stop:1302 length:1302 start_codon:no stop_codon:yes gene_type:incomplete [Lack 5'-end] codon-table.11"]</p>                                                                                                                                                                                                                                                                                |
| <p>["humangut159571453-stool1_revised_C710594_1_gene87154 strand:- start:502 stop:1464 length:963 start_codon:no stop_codon:yes gene_type:incomplete [Lack 5'-end] codon-table.11",<br/>"rumen0081_GL1646563_1 [gene] locus=scaffold888945_3:1:963:+[Lack 5'-end]",<br/>"cazygij643431560[gb]AIA99572.1  hypothetical protein [uncultured bacterium contig00010(2014)]"]</p>                                                                                         |
| <p>["humangut159814214-stool1_revised_scaffold14993_1_gene26555 strand:- start:2 stop:607 length:606 start_codon:yes stop_codon:no gene_type:incomplete [Lack 3'-end] codon-table.11",<br/>"pigPIG_200_GL0162359 [gene] locus=scaffold89599_5:700:1305:+ [Lack 3'-end] codon-table.11"]</p>                                                                                                                                                                          |
| <p>["humangut160603188-stool1_revised_C988630_1_gene107263 strand:- start:371 stop:1675 length:1305 start_codon:no stop_codon:yes gene_type:incomplete [Lack 5'-end] codon-table.11"]</p>                                                                                                                                                                                                                                                                            |
| <p>["humangut686765762-stool1_revised_C472423_1_gene33724 strand:- start:1125 stop:2351 length:1227 start_codon:no stop_codon:yes gene_type:incomplete [Lack 5'-end] codon-table.11",<br/>"rumen100058_GL1835902_1 [gene] locus=scaffold1661826_3:460:1686:+[Complete]"]</p>                                                                                                                                                                                         |
| <p>["humangut763496533-stool1_revised_C1161525_1_gene112770 strand:- start:2 stop:571 length:570 start_codon:yes stop_codon:no gene_type:incomplete [Lack 3'-end] codon-table.11"]</p>                                                                                                                                                                                                                                                                               |
| <p>["humangut764062976-stool1_revised_C1264223_1_gene131035 strand:- start:1289 stop:1936 length:648 start_codon:no stop_codon:yes gene_type:incomplete [Lack 5'-end] codon-table.11",<br/>"rumen3042_GL2264029_1 [gene] locus=scaffold1371059_2:208:855:-[Lack 5'-end]"]</p>                                                                                                                                                                                        |
| <p>["humangut764062976-stool1_revised_scaffold40568_3_gene149282 strand:+ start:6388 stop:7590 length:1203 start_codon:yes stop_codon:yes gene_type:complete<br/>[Complete] codon-table.11"]</p>                                                                                                                                                                                                                                                                     |
| <p>["humangutBGI001A_GL0024419 [gene] locus=scaffold7193_1:19067:20320:+ [Complete] codon-table.11",<br/>"rumen100058_GL3674533_1 [gene] locus=scaffold175438_2:1583:2836:-[Complete]"]</p>                                                                                                                                                                                                                                                                          |
| <p>["humangutBGI089A_GL0084439 [gene] locus=scaffold47176_1:1:1221:+ [Lack 5'-end] codon-table.11",<br/>"rumen2009040_GL3443456_1 [gene] locus=scaffold2815356_1:1132:2352:+[Complete]"]</p>                                                                                                                                                                                                                                                                         |
| <p>["humangutDLM018_GL0065366 [gene] locus=scaffold46582_5:3818:5011:- [Complete] codon-table.11",<br/>"pigBHZ-1B_GL0056960 [gene] locus=scaffold26544_1:7502:8695:- [Complete] codon-table.11",<br/>"pigBHZ-3B_GL0044984 [gene] locus=scaffold143974_1:8394:9587:- [Complete] codon-table.11",<br/>"rumen552_GL0302831_1 [gene] locus=scaffold397072_1:3349:4542:-[Complete]",<br/>"rumen552_GL0528208_1 [gene] locus=scaffold25689_2:33268:34461:-[Complete]",</p> |



|                                                                                                   |
|---------------------------------------------------------------------------------------------------|
| "rumen552_GL0891159_1 [gene] locus=scaffold306185_1:4343:5536:-[Complete]",                       |
| "rumen0081_GL1703369_1 [gene] locus=scaffold685453_4:388:1581:-[Complete]",                       |
| "rumen7049_GL0291338_1 [gene] locus=scaffold498578_2:3211:4404:+[Complete]"                       |
| ["humangutDLM020_GL0047564 [gene] locus=scaffold4283_1:3:578:+ [Lack both ends] codon-table.11"]  |
| ["humangutDLM028_GL0015950 [gene] locus=scaffold44194_1:1:960:- [Lack both ends] codon-table.11"] |
| ["humangutDOF008_GL0012963 [gene] locus=scaffold5558_23:452:868:+ [Lack 3'-end] codon-table.11"]  |
| ["humangutMH0001_GL0008963 [gene] locus=scaffold4941_9:21884:23056:+ [Complete] codon-table.11",  |
| "humangutMH0006_GL0069639 [gene] locus=scaffold5771_4:1736:2908:+ [Complete] codon-table.11",     |
| "humangutMH00212_GL0057095 [gene] locus=scaffold1862_26:4509:5681:+ [Complete] codon-table.11",   |
| "humangutMH00229_GL0190805 [gene] locus=scaffold90208_2:4449:5621:+ [Complete] codon-table.11",   |
| "humangutMH00260_GL0043424 [gene] locus=scaffold844_1:1138:2310:- [Complete] codon-table.11",     |
| "humangutMH00373_GL0061364 [gene] locus=scaffold40690_3:1866:3038:+ [Complete] codon-table.11",   |
| "humangutMH00433_GL0095455 [gene] locus=scaffold100358_3:241:1413:- [Complete] codon-table.11",   |
| "humangutDLM028_GL0033958 [gene] locus=scaffold17607_13:1499:2671:- [Complete] codon-table.11",   |
| "humangutDOM010_GL0020281 [gene] locus=scaffold6476_2:26932:28104:+ [Complete] codon-table.11",   |
| "humangutT2D-45A_GL0047609 [gene] locus=scaffold76749_1:69782:70954:- [Complete] codon-table.11", |
| "mouseMC-6-1_GL0102367 [gene] locus=scaffold72393_2:1662:2834:+ [Complete] codon-table.11",       |
| "mouseMC-6-2_GL0183039 [gene] locus=scaffold132992_1:105615:106787:+ [Complete] codon-table.11",  |
| "mouseGroup2-2A_GL0001768 [gene] locus=scaffold194_1:16577:17749:+ [Complete] codon-table.11",    |
| "mouseGroup2-3A_GL0155035 [gene] locus=scaffold97533_5:214:1386:+ [Complete] codon-table.11",     |
| "mouse11_GL0042095 [gene] locus=scaffold90279_1:1019:2191:- [Complete] codon-table.11",           |
| "mouse1-2_GL0036788 [gene] locus=scaffold29291_6:321:1493:- [Complete] codon-table.11",           |
| "mouse4-1_GL0031568 [gene] locus=scaffold29527_1:21738:22910:+ [Complete] codon-table.11",        |
| "mouse5-4_GL0028708 [gene] locus=scaffold51359_4:669:1841:- [Complete] codon-table.11",           |
| "mouse6-1_GL0086335 [gene] locus=scaffold3735_1:18410:19582:+ [Complete] codon-table.11",         |
| "pigPIG_196_GL0046463 [gene] locus=scaffold230571_1:94:1266:- [Complete] codon-table.11",         |
| "pigPIG-001_GL0131188 [gene] locus=scaffold52084_1:15174:16346:+ [Complete] codon-table.11",      |
| "pigPIG-007_GL0092032 [gene] locus=scaffold32192_4:106:1278:- [Complete] codon-table.11",         |
| "pigPIG-024_GL0032316 [gene] locus=scaffold117195_4:2442:3614:+ [Complete] codon-table.11",       |
| "pigPIG-025_GL0049563 [gene] locus=scaffold116655_1:134:1306:- [Complete] codon-table.11",        |
| "pigPIG-026_GL0131158 [gene] locus=scaffold100689_1:3431:4603:+ [Complete] codon-table.11",       |
| "pigPIG-039_GL0006796 [gene] locus=scaffold172054_1:4599:5771:+ [Complete] codon-table.11",       |
| "pigPIG-084_GL0130316 [gene] locus=scaffold34714_3:1151:2323:- [Complete] codon-table.11",        |
| "rumen553_GL0374550_1 [gene] locus=scaffold192374_1:70313:71485:+[Complete]",                     |
| "rumen583_GL0562823_1 [gene] locus=C5693781_1:12094:13266:+[Complete]",                           |
| "rumen554_GL0164185_1 [gene] locus=scaffold1890409_3:83:1255:+[Complete]",                        |
| "rumen554_GL0687568_1 [gene] locus=scaffold1598446_2:998:2170:+[Complete]",                       |
| "rumen554_GL1338144_1 [gene] locus=scaffold1192500_2:2501:3673:+[Complete]",                      |
| "rumen554_GL2685461_1 [gene] locus=scaffold1675218_5:171:1343:-[Complete]",                       |
| "rumen554_GL2922997_1 [gene] locus=scaffold665943_2:26:1198:-[Complete]",                         |
| "rumen555_GL2345541_1 [gene] locus=scaffold21142_2:8470:9642:+[Complete]",                        |
| "rumen100058_GL1062365_1 [gene] locus=scaffold1497823_4:6689:7861:+[Complete]",                   |
| "rumen100058_GL2538220_1 [gene] locus=scaffold171829_1:1536:2708:+[Complete]",                    |
| "rumen100058_GL3324879_1 [gene] locus=scaffold1542797_3:2066:3238:+[Complete]",                   |

"rumen2009040\_GL3211682\_1 [gene] locus=scaffold2032426\_3:119:1291:-[Complete]",

"rumen2009040\_GL3280346\_1 [gene] locus=scaffold2478833\_1:626:1798:-[Complete]",

"rumen3042\_GL0860282\_1 [gene] locus=scaffold804980\_2:390:1562:+[Complete]",

"rumen7049\_GL1043269\_1 [gene] locus=scaffold1199013\_1:1301:2473:+[Complete]"

---

["humangutMH0001\_GL0012727 [gene] locus=scaffold3748\_3:1867:3042:- [Complete] codon-table.11",

"humangutMH0002\_GL0036601 [gene] locus=scaffold13906\_2:27627:28802:+ [Complete] codon-table.11",

"humangutMH0040\_GL0059391 [gene] locus=scaffold2869\_1\_1:6999:8174:+ [Complete] codon-table.11",

"humangutMH0100\_GL0160313 [gene] locus=scaffold5389\_46:1109:2284:- [Complete] codon-table.11",

"humangutMH0143\_GL0122660 [gene] locus=scaffold48916\_1:1397:2572:+ [Complete] codon-table.11",

"humangutMH0144\_GL0121801 [gene] locus=scaffold30658\_10:1282:2457:- [Complete] codon-table.11",

"humangutMH0149\_GL0065608 [gene] locus=scaffold3870\_10:13891:15066:+ [Complete] codon-table.11",

"humangutMH0161\_GL0177592 [gene] locus=scaffold71483\_1:9329:10504:+ [Complete] codon-table.11",

"humangutO2.UC22-1\_GL0078164 [gene] locus=scaffold10239\_8:5660:6835:- [Complete] codon-table.11",

"humangutV1.F137\_GL0083288 [gene] locus=scaffold84494\_6:225:1400:- [Complete] codon-table.11",

"humangutT2D-11A\_GL0038541 [gene] locus=scaffold59242\_6:11013:12188:- [Complete] codon-table.11",

"mouseS-Fe20\_GL0180051 [gene] locus=scaffold102347\_1:23471:24646:- [Complete] codon-table.11",

"mouseS-Fe3\_GL0155724 [gene] locus=scaffold20\_2:32522:33697:+ [Complete] codon-table.11",

"mouseMC-0-1\_GL0064821 [gene] locus=scaffold53168\_13:5126:6301:- [Complete] codon-table.11",

"mouseG1-5A\_GL0044807 [gene] locus=scaffold25393\_2:378:1553:- [Complete] codon-table.11",

"mouseG1-5A\_GL0112860 [gene] locus=scaffold77446\_3:51404:52579:- [Complete] codon-table.11",

"mouseG1-6A\_GL0023709 [gene] locus=scaffold9642\_11:418:1593:+ [Complete] codon-table.11",

"mouseGroup2-3A\_GL0194457 [gene] locus=scaffold125876\_2:53386:54561:- [Complete] codon-table.11",

"mouse20\_GL0026048 [gene] locus=scaffold37937\_1:1428:2603:- [Complete] codon-table.11",

"mouse2-2\_GL0076415 [gene] locus=scaffold14974\_4:37481:38656:+ [Complete] codon-table.11",

"mouse23\_GL0060739 [gene] locus=scaffold35607\_2:2034:3209:+ [Complete] codon-table.11",

"mouse7-3\_GL0008012 [gene] locus=scaffold1210\_7:218:1393:+ [Complete] codon-table.11",

"mouse7-8\_GL0102343 [gene] locus=scaffold68021\_1:1414:2589:+ [Complete] codon-table.11",

"mouse8-7\_GL0056549 [gene] locus=scaffold18483\_2:6803:7978:+ [Complete] codon-table.11",

"pigPIG\_144\_GL0102692 [gene] locus=scaffold2700\_5:27313:28488:- [Complete] codon-table.11",

"pigPIG\_151\_GL0035862 [gene] locus=scaffold15482\_1:6405:7580:- [Complete] codon-table.11",

"pigPIG\_154\_GL0044207 [gene] locus=scaffold38224\_2:916:2091:+ [Complete] codon-table.11",

"pigPIG\_207\_GL0027936 [gene] locus=scaffold253081\_1:22:1197:- [Complete] codon-table.11",

"pigPIG-001\_GL0136662 [gene] locus=scaffold53466\_8:1479:2654:- [Complete] codon-table.11",

"pigPIG-006\_GL0203904 [gene] locus=scaffold60412\_6:186:1361:- [Complete] codon-table.11",

"pigPIG-009\_GL0057076 [gene] locus=scaffold18352\_6:2384:3559:+ [Complete] codon-table.11",

"pigPIG-017\_GL0131673 [gene] locus=scaffold766\_5:1342:2517:+ [Complete] codon-table.11",

"pigPIG-023\_GL0120564 [gene] locus=scaffold148282\_1:75220:76395:+ [Complete] codon-table.11",

"pigPIG-033\_GL0192316 [gene] locus=C1724773\_1:999:2174:- [Complete] codon-table.11",

"pigPIG-039\_GL0000920 [gene] locus=scaffold91017\_9:9441:10616:+ [Complete] codon-table.11",

"pigPIG-106\_GL0046632 [gene] locus=scaffold17851\_9:7690:8865:- [Complete] codon-table.11",

"pigBHZ-11B\_GL00090195 [gene] locus=scaffold167910\_1:494:1669:- [Complete] codon-table.11",

"pigBHZ-2B\_GL0040230 [gene] locus=scaffold82168\_1:1:1176:- [Complete] codon-table.11",

"pigDB-530B\_GL0118605 [gene] locus=scaffold107655\_1:1937:3112:- [Complete] codon-table.11",

"rumen553\_GL0392614\_1 [gene] locus=scaffold37534\_3:1887:3062:-[Complete]",

|                                                                                                                                                                                                                                                                                                                                                                                                                                                                                                                                                                                                                                                                                                                                                                                                                                                                                                                                                                                                                                                                                                                                                                                                                                                                                                                                                                                                                                                                                                                                                                                                                                                                                                                                                                                                                                                                                                                                                                                                                                                                                                                                                                                                                                                                                  |
|----------------------------------------------------------------------------------------------------------------------------------------------------------------------------------------------------------------------------------------------------------------------------------------------------------------------------------------------------------------------------------------------------------------------------------------------------------------------------------------------------------------------------------------------------------------------------------------------------------------------------------------------------------------------------------------------------------------------------------------------------------------------------------------------------------------------------------------------------------------------------------------------------------------------------------------------------------------------------------------------------------------------------------------------------------------------------------------------------------------------------------------------------------------------------------------------------------------------------------------------------------------------------------------------------------------------------------------------------------------------------------------------------------------------------------------------------------------------------------------------------------------------------------------------------------------------------------------------------------------------------------------------------------------------------------------------------------------------------------------------------------------------------------------------------------------------------------------------------------------------------------------------------------------------------------------------------------------------------------------------------------------------------------------------------------------------------------------------------------------------------------------------------------------------------------------------------------------------------------------------------------------------------------|
| <p>"rumen552_GL0987053_1 [gene] locus=scaffold1115340_1:4619:5794:-[Complete]",</p> <p>"rumen552_GL1341760_1 [gene] locus=scaffold137436_3:1187:2362:-[Complete]",</p> <p>"rumen583_GL0063681_1 [gene] locus=scaffold268085_3:55354:56529:+[Complete]",</p> <p>"rumen583_GL0159581_1 [gene] locus=scaffold172591_7:11717:12892:-[Complete]",</p> <p>"rumen583_GL0385136_1 [gene] locus=scaffold19862_2:1102:2277:-[Complete]",</p> <p>"rumen554_GL0264589_1 [gene] locus=scaffold21340_1:484:1659:+[Complete]",</p> <p>"rumen554_GL1088525_1 [gene] locus=scaffold977727_2:313:1488:+[Complete]",</p> <p>"rumen554_GL1230399_1 [gene] locus=C41612791_1:698:1873:-[Complete]",</p> <p>"rumen555_GL0512706_1 [gene] locus=scaffold81084_1:5267:6442:+[Complete]",</p> <p>"rumen555_GL1874408_1 [gene] locus=scaffold1378456_3:5285:6460:+[Complete]",</p> <p>"rumen0081_GL0989629_1 [gene] locus=C39771777_1:732:1907:-[Complete]",</p> <p>"rumen0081_GL2065341_1 [gene] locus=scaffold903959_2:1799:2974:+[Complete]",</p> <p>"rumen100058_GL1056176_1 [gene] locus=scaffold2252074_1:200:1372:-[Lack 3'-end]",</p> <p>"rumen100058_GL2978106_1 [gene] locus=C60508655_1:182:1357:+[Complete]",</p> <p>"rumen100058_GL3245501_1 [gene] locus=scaffold608862_5:3509:4684:+[Complete]",</p> <p>"cazygi 291530538 emb CBK96123.1  Predicted glycosylase [[Eubacterium] siraeum 70/3]",</p> <p>"cazygi 291557872 emb CBL34989.1  Predicted glycosylase [[Eubacterium] siraeum V10Sc8a]",</p> <p>"cazygi 345502714 gb AEN97397.1  glycosidase related protein [Roseburia hominis A2-183]",</p> <p>"cazygi 571258177 emb CCO04533.1  Glycoside Hydrolase Family 130 protein [Ruminococcus bicirculans]"</p>                                                                                                                                                                                                                                                                                                                                                                                                                                                                                                                                                                            |
| <p>["humangutMH0002_GL0067890 [gene] locus=scaffold1153_5:38816:39982:- [Complete] codon-table.11",</p> <p>"humangutMH0047_GL0038238 [gene] locus=scaffold32713_3:84:1250:- [Complete] codon-table.11",</p> <p>"humangutMH0054_GL0074871 [gene] locus=scaffold5732_2:908:2074:- [Complete] codon-table.11",</p> <p>"humangutMH0169_GL0036039 [gene] locus=scaffold22380_12:19531:20697:- [Complete] codon-table.11",</p> <p>"humangutMH0310_GL0051694 [gene] locus=scaffold51993_1:48097:49263:- [Complete] codon-table.11",</p> <p>"humangutMH0383_GL0114832 [gene] locus=scaffold80173_1:29524:30690:+ [Complete] codon-table.11",</p> <p>"humangutMH0415_GL0044234 [gene] locus=scaffold135679_1:13191:14357:- [Complete] codon-table.11",</p> <p>"humangutT2D-22A_GL0100754 [gene] locus=scaffold67755_2:58456:59622:+ [Complete] codon-table.11",</p> <p>"mouseS-Fe10_GL0057060 [gene] locus=scaffold40113_2:33961:35127:+ [Complete] codon-table.11",</p> <p>"mouseS-Fe10_GL0110865 [gene] locus=scaffold56450_1:34120:35286:- [Complete] codon-table.11",</p> <p>"mouseMC-0-1_GL0077339 [gene] locus=scaffold66101_1:40905:42071:- [Complete] codon-table.11",</p> <p>"pigPIG-002_GL0141929 [gene] locus=scaffold120314_2:2882:4048:- [Complete] codon-table.11",</p> <p>"pigPIG-048_GL0142122 [gene] locus=scaffold43767_1:27875:29041:+ [Complete] codon-table.11",</p> <p>"rumen554_GL0757272_1 [gene] locus=scaffold7618_1:2460:3626:-[Complete]",</p> <p>"rumen554_GL1755958_1 [gene] locus=scaffold446293_2:1797:2963:+[Complete]",</p> <p>"rumen554_GL2967180_1 [gene] locus=scaffold102921_8:23227:24393:+[Complete]",</p> <p>"rumen555_GL0083736_1 [gene] locus=scaffold994071_3:91595:92761:-[Complete]",</p> <p>"rumen555_GL1538021_1 [gene] locus=scaffold809012_3:558:1724:+[Complete]",</p> <p>"rumen100058_GL2073289_1 [gene] locus=scaffold1330887_6:177:1343:-[Complete]",</p> <p>"rumen2009040_GL2061377_1 [gene] locus=scaffold1112673_1:4064:5230:-[Complete]",</p> <p>"rumen7049_GL2253545_1 [gene] locus=scaffold386514_3:805:1971:+[Complete]",</p> <p>"rumen7049_GL2779726_1 [gene] locus=scaffold1300485_1:2980:4146:-[Complete]",</p> <p>"cazygi 324318387 gb ADY36278.1  glycosidase related protein [Bacteroides salanitronis DSM 18170]"</p> |
| <p>["humangutMH0003_GL0003142 [gene] locus=scaffold31787_1:6057:7253:- [Complete] codon-table.11",</p> <p>"humangutMH0267_GL0221938 [gene] locus=scaffold88613_1:5752:6948:- [Complete] codon-table.11",</p>                                                                                                                                                                                                                                                                                                                                                                                                                                                                                                                                                                                                                                                                                                                                                                                                                                                                                                                                                                                                                                                                                                                                                                                                                                                                                                                                                                                                                                                                                                                                                                                                                                                                                                                                                                                                                                                                                                                                                                                                                                                                     |

|                                                                                                                                                                                                                                                                                                                                                                                                                                                                                                                                                                                                                                                                                                                                                                                                                                                                                                                                                                                                                                                                                                                                                                                                                                                                                                                                                                                                                                                                                                                                                                                                                                                                                                                                                                                                                                                                                                                                                           |
|-----------------------------------------------------------------------------------------------------------------------------------------------------------------------------------------------------------------------------------------------------------------------------------------------------------------------------------------------------------------------------------------------------------------------------------------------------------------------------------------------------------------------------------------------------------------------------------------------------------------------------------------------------------------------------------------------------------------------------------------------------------------------------------------------------------------------------------------------------------------------------------------------------------------------------------------------------------------------------------------------------------------------------------------------------------------------------------------------------------------------------------------------------------------------------------------------------------------------------------------------------------------------------------------------------------------------------------------------------------------------------------------------------------------------------------------------------------------------------------------------------------------------------------------------------------------------------------------------------------------------------------------------------------------------------------------------------------------------------------------------------------------------------------------------------------------------------------------------------------------------------------------------------------------------------------------------------------|
| <p>"humangutT2D-2A_GL0041562 [gene] locus=scaffold11956_2:300:1496:- [Lack 5'-end] codon-table.11",</p> <p>"mouse10_GL0084381 [gene] locus=scaffold21177_35:3024:4220:- [Complete] codon-table.11",</p> <p>"pigPIG-093_GL0016195 [gene] locus=scaffold73456_3:3:1199:+ [Lack 5'-end] codon-table.11",</p> <p>"pigBHZ-12B_GL0015966 [gene] locus=scaffold143672_2:8550:9746:- [Complete] codon-table.11",</p> <p>"rumen554_GL2814085_1 [gene] locus=scaffold2177694_1:103:1299:-[Complete]",</p> <p>"rumen554_GL3044073_1 [gene] locus=scaffold255068_1:5358:6554:-[Complete]",</p> <p>"rumen2009040_GL1607558_1 [gene] locus=scaffold14374_1:4043:5239:+[Complete]",</p> <p>"rumen3042_GL1567335_1 [gene] locus=scaffold609419_1:43:1239:-[Complete]",</p> <p>"cazygi 312443599 gb ADQ79955.1  glycosidase related protein [Paludibacter propionigenes WB4]"</p>                                                                                                                                                                                                                                                                                                                                                                                                                                                                                                                                                                                                                                                                                                                                                                                                                                                                                                                                                                                                                                                                                          |
| <p>["humangutMH0003_GL0040210 [gene] locus=scaffold9278_1:4837:6006:- [Complete] codon-table.11",</p> <p>"humangut763982056-stool1_revised_scaffold33383_4_gene91709 strand:- start:1361 stop:2530 length:1170 start_codon:yes stop_codon:yes gene_type:complete [Complete] codon-table.11"]</p>                                                                                                                                                                                                                                                                                                                                                                                                                                                                                                                                                                                                                                                                                                                                                                                                                                                                                                                                                                                                                                                                                                                                                                                                                                                                                                                                                                                                                                                                                                                                                                                                                                                          |
| <p>["humangutMH0004_GL0014392 [gene] locus=scaffold3576_11:10154:11344:+ [Complete] codon-table.11",</p> <p>"humangutMH0016_GL0077493 [gene] locus=scaffold781_6:19537:20727:+ [Complete] codon-table.11",</p> <p>"humangutMH0142_GL0050877 [gene] locus=scaffold12269_6:1097:2287:- [Complete] codon-table.11",</p> <p>"humangutMH0146_GL0040498 [gene] locus=scaffold48645_1:19556:20746:+ [Complete] codon-table.11",</p> <p>"humangutMH0227_GL0085100 [gene] locus=scaffold57871_1:13279:14469:+ [Complete] codon-table.11",</p> <p>"humangutV1_CD37-4_GL0129659 [gene] locus=scaffold1237_4:318:1508:- [Lack 5'-end] codon-table.11",</p> <p>"humangutV1_CD38-0_GL0149408 [gene] locus=scaffold47721_2:21092:22282:+ [Complete] codon-table.11",</p> <p>"humangutNOF013_GL0005847 [gene] locus=scaffold11455_12:3385:4575:- [Complete] codon-table.11",</p> <p>"humangutT2D-113A_GL0017412 [gene] locus=scaffold39693_1:5489:6679:- [Complete] codon-table.11",</p> <p>"humangutT2D-135A_GL0097479 [gene] locus=scaffold4791_2:28290:29480:- [Complete] codon-table.11",</p> <p>"mouse1A-dyr2-07_GL0081296 [gene] locus=scaffold10432_2:34127:35317:+ [Complete] codon-table.11",</p> <p>"pigPIG_191_GL0129383 [gene] locus=scaffold66717_4:2548:3738:- [Lack 5'-end] codon-table.11",</p> <p>"pigPIG-004_GL0201947 [gene] locus=scaffold95810_1:2:11192:+ [Lack 5'-end] codon-table.11",</p> <p>"pigPIG-035_GL0179949 [gene] locus=scaffold49369_6:95:1285:- [Complete] codon-table.11",</p> <p>"pigBHZ-1B_GL0166577 [gene] locus=scaffold2900_1:8760:9950:- [Complete] codon-table.11",</p> <p>"rumen552_GL0765203_1 [gene] locus=scaffold188212_2:1693:2883:-[Complete]",</p> <p>"rumen555_GL0186127_1 [gene] locus=scaffold222754_1:21411:22601:+[Complete]",</p> <p>"rumen2009040_GL2207291_1 [gene] locus=scaffold383982_2:4701:5891:+[Complete]",</p> <p>"rumen2009040_GL2351849_1 [gene] locus=scaffold996819_1:14891:16081:+[Complete]"</p> |
| <p>["humangutMH0005_GL0003560 [gene] locus=scaffold18617_2:1:447:- [Lack 3'-end] codon-table.11"]</p>                                                                                                                                                                                                                                                                                                                                                                                                                                                                                                                                                                                                                                                                                                                                                                                                                                                                                                                                                                                                                                                                                                                                                                                                                                                                                                                                                                                                                                                                                                                                                                                                                                                                                                                                                                                                                                                     |
| <p>["humangutMH0008_GL0035219 [gene] locus=scaffold75_32:22073:23266:- [Complete] codon-table.11"]</p>                                                                                                                                                                                                                                                                                                                                                                                                                                                                                                                                                                                                                                                                                                                                                                                                                                                                                                                                                                                                                                                                                                                                                                                                                                                                                                                                                                                                                                                                                                                                                                                                                                                                                                                                                                                                                                                    |
| <p>"humangutMH0010_GL0028301 [gene] locus=scaffold17706_5:1453:2646:+ [Complete] codon-table.11",</p> <p>"humangutMH0088_GL0008413 [gene] locus=scaffold60292_2:6203:7396:- [Complete] codon-table.11",</p> <p>"humangutSZEY-39A_GL0012771 [gene] locus=scaffold23635_5:7654:8847:- [Complete] codon-table.11"]</p>                                                                                                                                                                                                                                                                                                                                                                                                                                                                                                                                                                                                                                                                                                                                                                                                                                                                                                                                                                                                                                                                                                                                                                                                                                                                                                                                                                                                                                                                                                                                                                                                                                       |
| <p>["humangutMH0046_GL0006703 [gene] locus=scaffold16924_6:476:1084:+ [Lack 3'-end] codon-table.11"]</p>                                                                                                                                                                                                                                                                                                                                                                                                                                                                                                                                                                                                                                                                                                                                                                                                                                                                                                                                                                                                                                                                                                                                                                                                                                                                                                                                                                                                                                                                                                                                                                                                                                                                                                                                                                                                                                                  |
| <p>["humangutMH0053_GL0020379 [gene] locus=scaffold22014_2:2:439:+ [Lack 5'-end] codon-table.11",</p> <p>"rumen2009040_GL1996083_1 [gene] locus=scaffold809218_1:1:438:+[Lack 5'-end]",</p> <p>"rumen3042_GL2590115_1 [gene] locus=scaffold526261_1:433:870:-[Lack 5'-end]"</p>                                                                                                                                                                                                                                                                                                                                                                                                                                                                                                                                                                                                                                                                                                                                                                                                                                                                                                                                                                                                                                                                                                                                                                                                                                                                                                                                                                                                                                                                                                                                                                                                                                                                           |
| <p>["humangutMH0053_GL0075282 [gene] locus=scaffold7906_13:9376:10569:+ [Complete] codon-table.11",</p> <p>"humangutMH0092_GL0158226 [gene] locus=scaffold39295_1:5340:6533:+ [Complete] codon-table.11",</p> <p>"mouse4-8_GL0099499 [gene] locus=scaffold61328_1:15238:16431:+ [Complete] codon-table.11",</p> <p>"pigPIG_119_GL0332247 [gene] locus=scaffold43880_29:768:1961:+ [Complete] codon-table.11",</p>                                                                                                                                                                                                                                                                                                                                                                                                                                                                                                                                                                                                                                                                                                                                                                                                                                                                                                                                                                                                                                                                                                                                                                                                                                                                                                                                                                                                                                                                                                                                         |

|                                                                                                                                                                                                                                                                                                                                                                                                                                                                                                                                                                                                                                                                                                                                                                                                                                                                                                                                                                                                                                                                                                                                                                                                                                                                               |
|-------------------------------------------------------------------------------------------------------------------------------------------------------------------------------------------------------------------------------------------------------------------------------------------------------------------------------------------------------------------------------------------------------------------------------------------------------------------------------------------------------------------------------------------------------------------------------------------------------------------------------------------------------------------------------------------------------------------------------------------------------------------------------------------------------------------------------------------------------------------------------------------------------------------------------------------------------------------------------------------------------------------------------------------------------------------------------------------------------------------------------------------------------------------------------------------------------------------------------------------------------------------------------|
| <p>"rumen553_GL0201985_1 [gene] locus=scaffold154648_1:14165:15358:-[Complete]",</p> <p>"rumen583_GL0464837_1 [gene] locus=scaffold107109_1:10:1203:-[Complete]",</p> <p>"rumen100058_GL1464037_1 [gene] locus=scaffold1214349_3:4269:5462:-[Complete]"</p>                                                                                                                                                                                                                                                                                                                                                                                                                                                                                                                                                                                                                                                                                                                                                                                                                                                                                                                                                                                                                   |
| <p>["humangutMH0055_GL0014394 [gene] locus=scaffold12333_5:3:419:+ [Lack 5'-end] codon-table.11",</p> <p>"pigPIG-043_GL0101446 [gene] locus=scaffold118544_2:245:661:- [Lack 5'-end] codon-table.11",</p> <p>"rumen7049_GL2623473_1 [gene] locus=scaffold1856051_1:111:527:-[Lack 5'-end]"</p>                                                                                                                                                                                                                                                                                                                                                                                                                                                                                                                                                                                                                                                                                                                                                                                                                                                                                                                                                                                |
| <p>["humangutMH0060_GL0011435 [gene] locus=scaffold3787_2:1830:2537:- [Lack 5'-end] codon-table.11"]</p>                                                                                                                                                                                                                                                                                                                                                                                                                                                                                                                                                                                                                                                                                                                                                                                                                                                                                                                                                                                                                                                                                                                                                                      |
| <p>["humangutMH0061_GL0035824 [gene] locus=scaffold26187_2:1262:2449:- [Complete] codon-table.11",</p> <p>"humangutMH0271_GL0008146 [gene] locus=scaffold22858_4:3394:4581:- [Complete] codon-table.11",</p> <p>"humangutV1_UC59-0_GL0075312 [gene] locus=scaffold50001_1:8606:9793:+ [Complete] codon-table.11",</p> <p>"humangutDLM013_GL0042248 [gene] locus=scaffold16696_3:2044:3231:- [Complete] codon-table.11",</p> <p>"humangutNOM023_GL0025373 [gene] locus=scaffold8794_4:144:1331:+ [Complete] codon-table.11",</p> <p>"humangut158924089-stool1_revised_scaffold11990_1_gene53457 strand:+ start:9800 stop:10987 length:1188 start_codon:yes stop_codon:yes gene_type:complete [Complete] codon-table.11",</p> <p>"humangut160704339-stool1_revised_scaffold20757_2_gene65170 strand:+ start:88554 stop:89741 length:1188 start_codon:yes stop_codon:yes gene_type:complete [Complete] codon-table.11",</p> <p>"humangut160765029-stool1_revised_scaffold21595_1_gene42009 strand:- start:35141 stop:36328 length:1188 start_codon:yes stop_codon:yes gene_type:complete [Complete] codon-table.11",</p> <p>"humangut457390.HMPREF9010_00339 [Complete]:- codon-table.11",</p> <p>"rumen552_GL1643634_1 [gene] locus=scaffold437481_1:1382:2569:-[Complete]"</p> |
| <p>["humangutMH0071_GL0050647 [gene] locus=scaffold13703_7:12209:13426:+ [Complete] codon-table.11",</p> <p>"humangutO2_UC50-0_GL0126452 [gene] locus=scaffold87365_4:6651:7868:- [Complete] codon-table.11",</p> <p>"humangut765094712-stool1_revised_scaffold5918_1_gene43451 strand:+ start:3918 stop:5135 length:1218 start_codon:yes stop_codon:yes gene_type:complete [Complete] codon-table.11",</p> <p>"humangut411476.BACOVA_02090 [Complete]:- codon-table.11"]</p>                                                                                                                                                                                                                                                                                                                                                                                                                                                                                                                                                                                                                                                                                                                                                                                                 |
| <p>["humangutMH0077_GL0038788 [gene] locus=scaffold26758_11:620:1669:- [Lack 5'-end] codon-table.11"]</p>                                                                                                                                                                                                                                                                                                                                                                                                                                                                                                                                                                                                                                                                                                                                                                                                                                                                                                                                                                                                                                                                                                                                                                     |
| <p>["humangutMH0077_GL0069156 [gene] locus=C1110387_1:1:759:+ [Lack both ends] codon-table.11"]</p>                                                                                                                                                                                                                                                                                                                                                                                                                                                                                                                                                                                                                                                                                                                                                                                                                                                                                                                                                                                                                                                                                                                                                                           |
| <p>["humangutMH0086_GL0043702 [gene] locus=scaffold3420_19:149:1336:- [Complete] codon-table.11",</p> <p>"humangutMH0169_GL0014591 [gene] locus=scaffold90896_3:5721:6908:+ [Complete] codon-table.11",</p> <p>"mouseG1-5A_GL0181295 [gene] locus=scaffold134836_1:10977:12164:- [Complete] codon-table.11",</p> <p>"mouse2-3_GL0031397 [gene] locus=scaffold235_3:7064:8251:- [Complete] codon-table.11",</p> <p>"pigPIG_115_GL0135634 [gene] locus=scaffold144786_1:209:1396:- [Complete] codon-table.11",</p> <p>"rumen2009040_GL2733267_1 [gene] locus=scaffold679350_1:2268:3455:+[Complete]"</p>                                                                                                                                                                                                                                                                                                                                                                                                                                                                                                                                                                                                                                                                        |
| <p>["humangutMH0106_GL0063906 [gene] locus=scaffold758_13:312:698:+ [Lack 3'-end] codon-table.11"]</p>                                                                                                                                                                                                                                                                                                                                                                                                                                                                                                                                                                                                                                                                                                                                                                                                                                                                                                                                                                                                                                                                                                                                                                        |
| <p>["humangutMH0141_GL0045172 [gene] locus=scaffold90823_2:59452:60723:- [Complete] codon-table.11",</p> <p>"pigEYZ-362B_GL0213996 [gene] locus=scaffold64315_1:2838:4109:+ [Complete] codon-table.11"]</p>                                                                                                                                                                                                                                                                                                                                                                                                                                                                                                                                                                                                                                                                                                                                                                                                                                                                                                                                                                                                                                                                   |
| <p>["humangutMH0150_GL0029065 [gene] locus=scaffold26200_7:3:1046:+ [Lack both ends] codon-table.11"]</p>                                                                                                                                                                                                                                                                                                                                                                                                                                                                                                                                                                                                                                                                                                                                                                                                                                                                                                                                                                                                                                                                                                                                                                     |
| <p>["humangutMH0154_GL0052097 [gene] locus=scaffold72395_2:2:619:- [Lack 3'-end] codon-table.11",</p> <p>"rumen554_GL2215439_1 [gene] locus=scaffold640454_4:141:758:+[Lack 3'-end]"</p>                                                                                                                                                                                                                                                                                                                                                                                                                                                                                                                                                                                                                                                                                                                                                                                                                                                                                                                                                                                                                                                                                      |
| <p>["humangutMH0158_GL0020995 [gene] locus=scaffold73_5:547:1941:- [Complete] codon-table.11"]</p>                                                                                                                                                                                                                                                                                                                                                                                                                                                                                                                                                                                                                                                                                                                                                                                                                                                                                                                                                                                                                                                                                                                                                                            |
| <p>["humangutMH0175_GL0008390 [gene] locus=scaffold5723_3:8628:9797:+ [Complete] codon-table.11",</p> <p>"humangutV1_CD15-3_GL0043751 [gene] locus=scaffold36254_15:2353:3522:- [Complete] codon-table.11",</p> <p>"humangutV1_UC14-1_GL0016015 [gene] locus=scaffold7083_11:304:1473:- [Complete] codon-table.11",</p> <p>"humangutV1_UC40-1_GL0189893 [gene] locus=scaffold26751_3:50075:51244:- [Complete] codon-table.11",</p>                                                                                                                                                                                                                                                                                                                                                                                                                                                                                                                                                                                                                                                                                                                                                                                                                                            |

|                                                                                                   |
|---------------------------------------------------------------------------------------------------|
| "humangutT2D-57A_GL0089819 [gene] locus=scaffold37237_2:48502:49671:- [Complete] codon-table.11", |
| "mouseS-Fe10_GL0020481 [gene] locus=scaffold62188_1:15006:16175:- [Complete] codon-table.11",     |
| "mouseMC-0-1_GL0000741 [gene] locus=scaffold182_2:1677:2846:+ [Complete] codon-table.11",         |
| "mouseMC-0-1_GL0097520 [gene] locus=scaffold86236_8:883:2052:+ [Complete] codon-table.11",        |
| "mouseMC-6-2_GL0172729 [gene] locus=scaffold131564_1:27302:28471:+ [Complete] codon-table.11",    |
| "mouseMC-6-3_GL0073206 [gene] locus=scaffold51250_1:1502:2671:- [Complete] codon-table.11",       |
| "mouseG1-1A_GL0086557 [gene] locus=scaffold69184_2:28379:29548:- [Complete] codon-table.11",      |
| "mouse1A-dyr2-07_GL0077917 [gene] locus=scaffold30795_6:18113:19282:- [Complete] codon-table.11", |
| "mouse4-1_GL0047775 [gene] locus=scaffold62147_1:73815:74984:+ [Complete] codon-table.11",        |
| "pigPIG-031_GL0058312 [gene] locus=scaffold110073_3:2:1171:+ [Lack 5'-end] codon-table.11",       |
| "rumen553_GL0098295_1 [gene] locus=scaffold295983_2:2588:3757:+[Complete]",                       |
| "rumen553_GL0293893_1 [gene] locus=scaffold354547_1:12051:13220:+[Complete]",                     |
| "rumen553_GL0533049_1 [gene] locus=scaffold81146_1:24886:26055:-[Complete]",                      |
| "rumen553_GL0770667_1 [gene] locus=scaffold119161_1:16572:17741:-[Complete]",                     |
| "rumen553_GL0805459_1 [gene] locus=scaffold183561_1:1086:2255:+[Complete]",                       |
| "rumen552_GL0986920_1 [gene] locus=scaffold127796_2:7380:8549:-[Complete]",                       |
| "rumen552_GL1043400_1 [gene] locus=scaffold209443_2:5010:6179:-[Complete]",                       |
| "rumen552_GL1104510_1 [gene] locus=scaffold1115005_1:25884:27053:+[Complete]",                    |
| "rumen583_GL0766550_1 [gene] locus=scaffold280980_1:26443:27612:-[Complete]",                     |
| "rumen554_GL0710234_1 [gene] locus=scaffold320099_2:4450:5619:-[Complete]",                       |
| "rumen554_GL0903399_1 [gene] locus=scaffold360775_1:16715:17884:-[Complete]",                     |
| "rumen554_GL1512054_1 [gene] locus=scaffold144087_3:211:1380:+[Complete]",                        |
| "rumen554_GL2005306_1 [gene] locus=scaffold18673_1:97:1266:-[Complete]",                          |
| "rumen554_GL2346766_1 [gene] locus=scaffold84744_2:1230:2399:-[Complete]",                        |
| "rumen555_GL0739033_1 [gene] locus=scaffold168963_2:11384:12553:+[Complete]",                     |
| "rumen555_GL2164851_1 [gene] locus=scaffold1262900_1:12081:13250:+[Complete]",                    |
| "rumen0081_GL0834214_1 [gene] locus=scaffold1778304_1:216:1385:+[Complete]",                      |
| "rumen0081_GL0861054_1 [gene] locus=scaffold102262_2:2898:4067:+[Complete]",                      |
| "rumen0081_GL2320442_1 [gene] locus=scaffold697257_1:53555:54724:-[Complete]",                    |
| "rumen100058_GL0730810_1 [gene] locus=scaffold3230704_2:1372:2541:-[Complete]",                   |
| "rumen100058_GL1140795_1 [gene] locus=scaffold3123978_2:2:1171:+[Lack 5'-end]",                   |
| "rumen100058_GL1382710_1 [gene] locus=scaffold1446962_3:12479:13648:-[Complete]",                 |
| "rumen100058_GL1713671_1 [gene] locus=scaffold3260277_1:1017:2186:-[Complete]",                   |
| "rumen100058_GL1870643_1 [gene] locus=scaffold831521_2:3236:4405:-[Complete]",                    |
| "rumen100058_GL2879678_1 [gene] locus=scaffold2011468_1:77:1246:-[Complete]",                     |
| "rumen100058_GL2882754_1 [gene] locus=scaffold2160084_1:97:1266:+[Complete]",                     |
| "rumen100058_GL3753782_1 [gene] locus=scaffold519037_1:1585:2754:+[Complete]",                    |
| "rumen2009040_GL0755339_1 [gene] locus=scaffold134393_1:1164:2333:-[Complete]",                   |
| "rumen2009040_GL2002423_1 [gene] locus=scaffold638974_6:23852:25021:-[Complete]",                 |
| "rumen3042_GL2710176_1 [gene] locus=scaffold456468_4:1590:2759:-[Complete]"                       |
| ["humangutMH0181_GL104159 [gene] locus=scaffold148_2:1:447:- [Lack 3'-end] codon-table.11"]       |
| ["humangutMH0181_GL0119730 [gene] locus=scaffold148_1:5514:6188:- [Lack 5'-end] codon-table.11",  |
| "rumen7049_GL2326404_1 [gene] locus=scaffold399270_1:3779:4453:-[Lack 5'-end]"                    |
| ["humangutMH0183_GL0124654 [gene] locus=scaffold57416_2:665:1348:- [Lack 5'-end] codon-table.11"] |

|                                                                                                                                                                                                                                                                                                                                                                                                                                                                                                                                                                                                                                                                                                                                                                                                                                                                                                                                                                                     |
|-------------------------------------------------------------------------------------------------------------------------------------------------------------------------------------------------------------------------------------------------------------------------------------------------------------------------------------------------------------------------------------------------------------------------------------------------------------------------------------------------------------------------------------------------------------------------------------------------------------------------------------------------------------------------------------------------------------------------------------------------------------------------------------------------------------------------------------------------------------------------------------------------------------------------------------------------------------------------------------|
| ["humangutMH0189_GL0061360 [gene] locus=scaffold5399_7:13426:14622:+ [Complete] codon-table.11"]                                                                                                                                                                                                                                                                                                                                                                                                                                                                                                                                                                                                                                                                                                                                                                                                                                                                                    |
| ["humangutMH0193_GL0079553 [gene] locus=scaffold80193_1:6442:7626:- [Complete] codon-table.11",<br>"humangutMH0346_GL0012872 [gene] locus=scaffold91286_1:73757:74941:+ [Complete] codon-table.11",<br>"humangutO2.UC7-1_GL0002488 [gene] locus=scaffold7596_2:22867:24051:+ [Complete] codon-table.11",<br>"humangutV1.CD42-0_GL0134459 [gene] locus=scaffold3497_9:378:1562:+ [Complete] codon-table.11",<br>"mouseS-Fe8_GL0202730 [gene] locus=scaffold84136_4:26492:27676:+ [Complete] codon-table.11",<br>"mouseMC-0-1_GL0081615 [gene] locus=scaffold70529_1:4761:5945:- [Complete] codon-table.11",<br>"mouseGroup2-1A_GL0071200 [gene] locus=scaffold49224_2:144:1328:+ [Complete] codon-table.11",<br>"mouse3-6_GL0024704 [gene] locus=scaffold28367_2:7518:8702:+ [Complete] codon-table.11",<br>"pigDB-510B_GL0206545 [gene] locus=scaffold49419_2:2273:3457:+ [Complete] codon-table.11",<br>"rumen554_GL0769618_1 [gene] locus=scaffold370046_1:386:1570:+[Complete]"] |
| ["humangutMH0197_GL0075607 [gene] locus=scaffold39932_1:1229:2377:+ [Complete] codon-table.11"]                                                                                                                                                                                                                                                                                                                                                                                                                                                                                                                                                                                                                                                                                                                                                                                                                                                                                     |
| ["humangutMH0197_GL0097441 [gene] locus=C1904641_1:217:744:- [Lack 5'-end] codon-table.11"]                                                                                                                                                                                                                                                                                                                                                                                                                                                                                                                                                                                                                                                                                                                                                                                                                                                                                         |
| ["humangutMH0197_GL0103303 [gene] locus=scaffold89255_1:3:653:- [Lack 3'-end] codon-table.11"]                                                                                                                                                                                                                                                                                                                                                                                                                                                                                                                                                                                                                                                                                                                                                                                                                                                                                      |
| ["humangutMH0198_GL0043816 [gene] locus=scaffold44551_1:347:1261:+ [Lack 3'-end] codon-table.11"]                                                                                                                                                                                                                                                                                                                                                                                                                                                                                                                                                                                                                                                                                                                                                                                                                                                                                   |
| ["humangutMH0200_GL0168561 [gene] locus=scaffold19653_1:10723:12000:- [Complete] codon-table.11"]                                                                                                                                                                                                                                                                                                                                                                                                                                                                                                                                                                                                                                                                                                                                                                                                                                                                                   |
| ["humangutMH0203_GL0230351 [gene] locus=scaffold10958_6:967:2178:+ [Complete] codon-table.11",<br>"mouseGroup2-3A_GL0127943 [gene] locus=scaffold74719_1:14518:15729:- [Complete] codon-table.11",<br>"mouse2-2_GL0057371 [gene] locus=scaffold117963_5:22906:24117:+ [Complete] codon-table.11"]                                                                                                                                                                                                                                                                                                                                                                                                                                                                                                                                                                                                                                                                                   |
| ["humangutMH0206_GL0205749 [gene] locus=scaffold152889_1:3:554:- [Lack 3'-end] codon-table.11"]                                                                                                                                                                                                                                                                                                                                                                                                                                                                                                                                                                                                                                                                                                                                                                                                                                                                                     |
| ["humangutMH0229_GL0174354 [gene] locus=scaffold129056_1:1153:2364:+ [Complete] codon-table.11"]                                                                                                                                                                                                                                                                                                                                                                                                                                                                                                                                                                                                                                                                                                                                                                                                                                                                                    |
| ["humangutMH0233_GL0001986 [gene] locus=scaffold24485_3:3:836:+ [Lack 5'-end] codon-table.11",<br>"humangutV1.UC37-0_GL0072500 [gene] locus=scaffold19643_12:2:835:+ [Lack 5'-end] codon-table.11",<br>"rumen100058_GL3508998_1 [gene] locus=scaffold491945_2:2:835:+[Lack 5'-end]"]                                                                                                                                                                                                                                                                                                                                                                                                                                                                                                                                                                                                                                                                                                |
| ["humangutMH0234_GL0092685 [gene] locus=scaffold17765_28:1:1197:+ [Lack 5'-end] codon-table.11"]                                                                                                                                                                                                                                                                                                                                                                                                                                                                                                                                                                                                                                                                                                                                                                                                                                                                                    |
| ["humangutMH0239_GL0155111 [gene] locus=scaffold10725_5:3212:4375:+ [Complete] codon-table.11",<br>"rumen553_GL0025787_1 [gene] locus=scaffold425815_1:7629:8792:+[Complete]",<br>"rumen0081_GL2522705_1 [gene] locus=scaffold1391530_3:119:1279:+[Lack 3'-end]"]                                                                                                                                                                                                                                                                                                                                                                                                                                                                                                                                                                                                                                                                                                                   |
| ["humangutMH0243_GL0036444 [gene] locus=scaffold76437_2:1:645:+ [Lack 5'-end] codon-table.11",<br>"rumen3042_GL1083413_1 [gene] locus=scaffold85108_2:2:646:+[Lack 5'-end]"]                                                                                                                                                                                                                                                                                                                                                                                                                                                                                                                                                                                                                                                                                                                                                                                                        |
| ["humangutMH0243_GL0087501 [gene] locus=scaffold76437_1:22166:22651:+ [Lack 3'-end] codon-table.11"]                                                                                                                                                                                                                                                                                                                                                                                                                                                                                                                                                                                                                                                                                                                                                                                                                                                                                |
| ["humangutMH0245_GL0164712 [gene] locus=scaffold19950_17:1:459:- [Lack 3'-end] codon-table.11",<br>"rumen100058_GL1426300_1 [gene] locus=scaffold412313_8:3:461:-[Lack 3'-end]"]                                                                                                                                                                                                                                                                                                                                                                                                                                                                                                                                                                                                                                                                                                                                                                                                    |
| ["humangutMH0247_GL0065460 [gene] locus=scaffold3604_3:9122:10354:+ [Complete] codon-table.11"]                                                                                                                                                                                                                                                                                                                                                                                                                                                                                                                                                                                                                                                                                                                                                                                                                                                                                     |
| ["humangutMH0250_GL0282662 [gene] locus=scaffold85700_1:3:533:- [Lack 3'-end] codon-table.11"]                                                                                                                                                                                                                                                                                                                                                                                                                                                                                                                                                                                                                                                                                                                                                                                                                                                                                      |
| ["humangutMH0251_GL0042591 [gene] locus=scaffold19287_3:1:1500:- [Lack 3'-end] codon-table.11"]                                                                                                                                                                                                                                                                                                                                                                                                                                                                                                                                                                                                                                                                                                                                                                                                                                                                                     |
| ["humangutMH0260_GL0038292 [gene] locus=scaffold87671_1:158:916:+ [Lack 3'-end] codon-table.11"]                                                                                                                                                                                                                                                                                                                                                                                                                                                                                                                                                                                                                                                                                                                                                                                                                                                                                    |
| ["humangutMH0260_GL0046878 [gene] locus=scaffold103034_1:2:511:- [Lack both ends] codon-table.11"]                                                                                                                                                                                                                                                                                                                                                                                                                                                                                                                                                                                                                                                                                                                                                                                                                                                                                  |
| ["humangutMH0260_GL0095703 [gene] locus=scaffold39193_15:2497:3636:+ [Complete] codon-table.11"]                                                                                                                                                                                                                                                                                                                                                                                                                                                                                                                                                                                                                                                                                                                                                                                                                                                                                    |
| ["humangutMH0266_GL0001165 [gene] locus=scaffold15158_8:163:639:- [Lack 5'-end] codon-table.11"]                                                                                                                                                                                                                                                                                                                                                                                                                                                                                                                                                                                                                                                                                                                                                                                                                                                                                    |
| ["humangutMH0266_GL0022658 [gene] locus=scaffold29203_10:3373:4527:+ [Complete] codon-table.11"]                                                                                                                                                                                                                                                                                                                                                                                                                                                                                                                                                                                                                                                                                                                                                                                                                                                                                    |
| ["humangutMH0266_GL0082076 [gene] locus=scaffold3083_15:2:625:- [Lack 3'-end] codon-table.11"]                                                                                                                                                                                                                                                                                                                                                                                                                                                                                                                                                                                                                                                                                                                                                                                                                                                                                      |
| ["humangutMH0266_GL0106114 [gene] locus=scaffold29683_1:2:475:- [Lack 3'-end] codon-table.11",                                                                                                                                                                                                                                                                                                                                                                                                                                                                                                                                                                                                                                                                                                                                                                                                                                                                                      |

|                                                                                                                                                                                                                                                                                           |
|-------------------------------------------------------------------------------------------------------------------------------------------------------------------------------------------------------------------------------------------------------------------------------------------|
| "humangutMH0403_GL0154505 [gene] locus=scaffold81282_1:2:475:- [Lack 3'-end] codon-table.11"                                                                                                                                                                                              |
| "humangutMH0267_GL0078594 [gene] locus=scaffold25085_7:2:796:+ [Lack 5'-end] codon-table.11",<br>"rumen3042_GL1054393_1 [gene] locus=scaffold17865_2:2:796:+[Lack 5'-end]"                                                                                                                |
| "humangutMH0271_GL0060042 [gene] locus=scaffold25955_5:85:771:+ [Lack 3'-end] codon-table.11"                                                                                                                                                                                             |
| "humangutMH0276_GL0215010 [gene] locus=C1978076_1:1:561:- [Lack 3'-end] codon-table.11",<br>"mouse20_GL0049333 [gene] locus=scaffold88136_5:2:562:- [Lack 3'-end] codon-table.11"                                                                                                         |
| "humangutMH0287_GL0048636 [gene] locus=scaffold63999_1:44240:45394:+ [Complete] codon-table.11",<br>"rumen7049_GL0174478_1 [gene] locus=scaffold26723_4:867:2021:-[Lack 5'-end]"                                                                                                          |
| "humangutMH0302_GL0088302 [gene] locus=scaffold62124_1:9329:10327:+ [Complete] codon-table.11"                                                                                                                                                                                            |
| "humangutMH0309_GL0064688 [gene] locus=scaffold37913_3:2:628:+ [Lack 5'-end] codon-table.11"                                                                                                                                                                                              |
| "humangutMH0309_GL0096983 [gene] locus=scaffold37913_2:167:655:+ [Lack 3'-end] codon-table.11"                                                                                                                                                                                            |
| "humangutMH0315_GL0027374 [gene] locus=scaffold15353_1:1:567:- [Lack 3'-end] codon-table.11"                                                                                                                                                                                              |
| "humangutMH0318_GL0144813 [gene] locus=scaffold97586_2:3:809:- [Lack 3'-end] codon-table.11"                                                                                                                                                                                              |
| "humangutMH0319_GL0012399 [gene] locus=scaffold73619_4:648:1886:+ [Complete] codon-table.11",<br>"pigPIG_202_GL0230914 [gene] locus=scaffold237116_1:17896:19134:+ [Complete] codon-table.11"                                                                                             |
| "humangutMH0355_GL0031281 [gene] locus=C2003740_1:3:599:- [Lack both ends] codon-table.11",<br>"rumen554_GL0269222_1 [gene] locus=scaffold1445625_4:3:602:+[Lack 5'-end]",<br>"rumen0081_GL2326714_1 [gene] locus=scaffold838015_1:1:600:+[Lack 5'-end]"                                  |
| "humangutMH0355_GL0112804 [gene] locus=scaffold93624_5:1898:3064:+ [Complete] codon-table.11",<br>"mouse7-1_GL0034863 [gene] locus=scaffold72_16:4814:5980:+ [Complete] codon-table.11"                                                                                                   |
| "humangutMH0357_GL0093535 [gene] locus=scaffold6302_5:262:873:+ [Lack 3'-end] codon-table.11"                                                                                                                                                                                             |
| "humangutMH0358_GL0063993 [gene] locus=scaffold7965_1:2:478:- [Lack 3'-end] codon-table.11"                                                                                                                                                                                               |
| "humangutMH0362_GL0062124 [gene] locus=scaffold106578_1:5100:6281:- [Complete] codon-table.11"                                                                                                                                                                                            |
| "humangutMH0363_GL0120444 [gene] locus=scaffold17645_9:1:930:+ [Lack both ends] codon-table.11"                                                                                                                                                                                           |
| "humangutMH0364_GL0127490 [gene] locus=scaffold13251_4:1:813:- [Lack 3'-end] codon-table.11"                                                                                                                                                                                              |
| "humangutMH0374_GL0078912 [gene] locus=scaffold82649_3:5617:6297:+ [Lack 3'-end] codon-table.11"                                                                                                                                                                                          |
| "humangutMH0377_GL0151261 [gene] locus=scaffold73020_3:653:1129:+ [Lack 3'-end] codon-table.11",<br>"pigZXZ-2B_GL0174477 [gene] locus=scaffold69697_1:367:843:+ [Lack 3'-end] codon-table.11"                                                                                             |
| "humangutMH0382_GL0012715 [gene] locus=scaffold7953_12:2:913:+ [Lack 5'-end] codon-table.11"                                                                                                                                                                                              |
| "humangutMH0394_GL0045810 [gene] locus=scaffold10293_15:2:499:+ [Lack 5'-end] codon-table.11",<br>"rumen552_GL1380709_1 [gene] locus=scaffold503799_1:1:498:+[Lack 5'-end]"                                                                                                               |
| "humangutMH0402_GL0056181 [gene] locus=scaffold70513_3:223:1209:- [Complete] codon-table.11"                                                                                                                                                                                              |
| "humangutMH0402_GL0221154 [gene] locus=scaffold10526_6:4980:6188:- [Complete] codon-table.11",<br>"pigPIG-054_GL0165253 [gene] locus=scaffold157312_1:12154:13362:+ [Complete] codon-table.11",<br>"pigPIG-055_GL0196683 [gene] locus=scaffold8432_2:22:1230:+ [Complete] codon-table.11" |
| "humangutMH0404_GL0163934 [gene] locus=scaffold3587_11:156:944:+ [Lack 3'-end] codon-table.11"                                                                                                                                                                                            |
| "humangutMH0411_GL0010782 [gene] locus=scaffold693_1:1884:2549:+ [Complete] codon-table.11"                                                                                                                                                                                               |
| "humangutMH0414_GL0042138 [gene] locus=scaffold13440_8:187:1533:+ [Complete] codon-table.11"                                                                                                                                                                                              |
| "humangutMH0416_GL0214784 [gene] locus=scaffold50630_5:4:954:- [Complete] codon-table.11"                                                                                                                                                                                                 |
| "humangutMH0419_GL0051194 [gene] locus=scaffold93199_1:1:498:- [Lack 3'-end] codon-table.11",<br>"pigPIG_138_GL0080226 [gene] locus=scaffold147754_1:191:688:+ [Lack 3'-end] codon-table.11"                                                                                              |
| "humangutMH0420_GL0064849 [gene] locus=scaffold5278_1:1369:4221:- [Complete] codon-table.11",<br>"humangutO2.CD3-0-PT_GL0002951 [gene] locus=scaffold88260_1:12389:15241:+ [Complete] codon-table.11"                                                                                     |



|                                                                                                                                                                                                                                                                                                                                                                                                                                                        |
|--------------------------------------------------------------------------------------------------------------------------------------------------------------------------------------------------------------------------------------------------------------------------------------------------------------------------------------------------------------------------------------------------------------------------------------------------------|
| ["humangutMH0425_GL0001000 [gene] locus=scaffold110_8:1223:2149:- [Complete] codon-table.11"]                                                                                                                                                                                                                                                                                                                                                          |
| ["humangutMH0426_GL0161889 [gene] locus=scaffold10744_4:1047:2252:- [Complete] codon-table.11",<br>"humangutO2_UC6-0_GL0015540 [gene] locus=scaffold10453_2:37136:38338:+ [Lack 3'-end] codon-table.11"]                                                                                                                                                                                                                                               |
| ["humangutMH0428_GL0023013 [gene] locus=scaffold35487_1:3:767:- [Lack 3'-end] codon-table.11"]                                                                                                                                                                                                                                                                                                                                                         |
| ["humangutMH0431_GL0054417 [gene] locus=scaffold115150_1:51638:52126:+ [Lack 3'-end] codon-table.11",<br>"humangutNOF010_GL0094281 [gene] locus=scaffold48727_12:11853:12341:+ [Lack 3'-end] codon-table.11"]                                                                                                                                                                                                                                          |
| ["humangutMH0437_GL0054519 [gene] locus=scaffold9441_16:2026:3099:+ [Lack 3'-end] codon-table.11"]                                                                                                                                                                                                                                                                                                                                                     |
| ["humangutMH0439_GL0071704 [gene] locus=scaffold116113_1:806:1951:- [Complete] codon-table.11",<br>"rumen583_GL0325328_1 [gene] locus=scaffold76910_2:8503:9648:-[Lack 5'-end]",<br>"rumen2009040_GL0533400_1 [gene] locus=scaffold336820_1:238:1383:+[Complete]",<br>"rumen2009040_GL2980251_1 [gene] locus=scaffold132598_2:1235:2380:-[Lack 5'-end]",<br>"rumen7049_GL1338378_1 [gene] locus=scaffold1587737_2:15:1160:-[Complete]"]                |
| ["humangutMH0439_GL0188834 [gene] locus=scaffold4226_2:140:1216:- [Lack 5'-end] codon-table.11"]                                                                                                                                                                                                                                                                                                                                                       |
| ["humangutMH0443_GL0182786 [gene] locus=scaffold52476_4:1:1809:- [Lack 3'-end] codon-table.11"]                                                                                                                                                                                                                                                                                                                                                        |
| ["humangutMH0447_GL0161554 [gene] locus=scaffold2816_1:2439:3596:- [Complete] codon-table.11"]                                                                                                                                                                                                                                                                                                                                                         |
| ["humangutMH0454_GL0202719 [gene] locus=scaffold33667_1:1:633:+ [Lack 5'-end] codon-table.11",<br>"humangut764588959-stool1_revised_scaffold37375_1_gene66956 strand:+ start:2 stop:634 length:633 start_codon:no stop_codon:yes gene_type:incomplete [Lack 5'-end] codon-table.11"]                                                                                                                                                                   |
| ["humangutMH0457_GL0023585 [gene] locus=scaffold51546_2:2:613:- [Lack both ends] codon-table.11"]                                                                                                                                                                                                                                                                                                                                                      |
| ["humangutMH0457_GL0138585 [gene] locus=scaffold43943_7:316:798:+ [Lack 3'-end] codon-table.11",<br>"mouse7_GL0070851 [gene] locus=scaffold4107_3:145:627:+ [Lack 3'-end] codon-table.11",<br>"rumen7049_GL2519476_1 [gene] locus=scaffold2250314_2:1:483:-[Lack 3'-end]"]                                                                                                                                                                             |
| ["humangutN006A_GL0039158 [gene] locus=scaffold26845_5:1:702:+ [Lack 5'-end] codon-table.11"]                                                                                                                                                                                                                                                                                                                                                          |
| ["humangutN006A_GL0056549 [gene] locus=scaffold61875_3:2:853:+ [Lack 5'-end] codon-table.11"]                                                                                                                                                                                                                                                                                                                                                          |
| ["humangutN038A_GL0028817 [gene] locus=scaffold1158_2:682:1872:- [Complete] codon-table.11"]                                                                                                                                                                                                                                                                                                                                                           |
| ["humangutN075A_GL0061161 [gene] locus=scaffold48837_1:25141:26328:- [Complete] codon-table.11",<br>"humangut158337416-stool2_revised_C1037800_1_gene78616 strand:+ start:1721 stop:2908 length:1188 start_codon:yes stop_codon:yes gene_type:complete [Complete] codon-table.11",<br>"rumen100058_GL3253793_1 [gene] locus=scaffold841137_1:2702:3889:+[Complete]",<br>"rumen2009040_GL2731047_1 [gene] locus=scaffold432748_1:205:1392:-[Complete]"] |
| ["humangutN085A_GL0029153 [gene] locus=scaffold8604_2:2:586:+ [Lack both ends] codon-table.11",<br>"rumen3042_GL1835188_1 [gene] locus=scaffold590073_1:2:586:+[Lack both ends]"]                                                                                                                                                                                                                                                                      |
| ["humangutNLM015_GL0015696 [gene] locus=scaffold22524_2:4109:4981:+ [Complete] codon-table.11",<br>"mouse1A-dyr4-07_GL0070332 [gene] locus=scaffold24038_1:371:1243:- [Complete] codon-table.11"]                                                                                                                                                                                                                                                      |
| ["humangutNLM022_GL0049460 [gene] locus=scaffold43914_1:1:711:- [Lack 3'-end] codon-table.11"]                                                                                                                                                                                                                                                                                                                                                         |
| ["humangutNLM023_GL0044946 [gene] locus=scaffold21510_4:3:989:- [Lack 3'-end] codon-table.11"]                                                                                                                                                                                                                                                                                                                                                         |
| ["humangutNLM031_GL0013903 [gene] locus=scaffold21775_7:2976:5030:+ [Lack 3'-end] codon-table.11"]                                                                                                                                                                                                                                                                                                                                                     |
| ["humangutNOF006_GL0036819 [gene] locus=scaffold9781_6:479:892:- [Lack 5'-end] codon-table.11"]                                                                                                                                                                                                                                                                                                                                                        |
| ["humangutNOM020_GL0049765 [gene] locus=scaffold31130_2:2:928:- [Lack 3'-end] codon-table.11"]                                                                                                                                                                                                                                                                                                                                                         |
| ["humangutNOM023_GL0036783 [gene] locus=scaffold8794_7:1:801:+ [Lack both ends] codon-table.11"]                                                                                                                                                                                                                                                                                                                                                       |
| ["humangutO2_UC12-2_GL0120407 [gene] locus=scaffold2961_5:2:580:+ [Lack 5'-end] codon-table.11",<br>"pigSYZ-481B_GL0086675 [gene] locus=scaffold28811_2:3:581:+ [Lack 5'-end] codon-table.11"]                                                                                                                                                                                                                                                         |
| ["humangutO2_UC22-1_GL0118828 [gene] locus=scaffold9468_1:2:787:- [Lack both ends] codon-table.11"]                                                                                                                                                                                                                                                                                                                                                    |

|                                                                                                                                                                                                                                                                                                                                                                                                                                                                                                                                                                                                                                                                                                                                                                                                                                                                                                                                                                                                                                |
|--------------------------------------------------------------------------------------------------------------------------------------------------------------------------------------------------------------------------------------------------------------------------------------------------------------------------------------------------------------------------------------------------------------------------------------------------------------------------------------------------------------------------------------------------------------------------------------------------------------------------------------------------------------------------------------------------------------------------------------------------------------------------------------------------------------------------------------------------------------------------------------------------------------------------------------------------------------------------------------------------------------------------------|
| ["humangutO2.UC28-1_GL0023149 [gene] locus=scaffold112925_2:3:644:- [Lack 3'-end] codon-table.11"]                                                                                                                                                                                                                                                                                                                                                                                                                                                                                                                                                                                                                                                                                                                                                                                                                                                                                                                             |
| ["humangutO2.UC28-1_GL0171115 [gene] locus=scaffold112925_1:209:709:- [Lack 5'-end] codon-table.11",<br>"humangutT2D-51A_GL0130607 [gene] locus=scaffold36233_1:2:502:+ [Lack 5'-end] codon-table.11",<br>"rumen583_GL0522900_1 [gene] locus=C5102750_1:48:548:-[Lack 5'-end]"]                                                                                                                                                                                                                                                                                                                                                                                                                                                                                                                                                                                                                                                                                                                                                |
| ["humangutO2.UC3-0_GL0141339 [gene] locus=scaffold74815_2:4974:5621:+ [Complete] codon-table.11"]                                                                                                                                                                                                                                                                                                                                                                                                                                                                                                                                                                                                                                                                                                                                                                                                                                                                                                                              |
| ["humangutO2.UC40-1_GL0087978 [gene] locus=scaffold6773_3:1:1533:+ [Lack both ends] codon-table.11"]                                                                                                                                                                                                                                                                                                                                                                                                                                                                                                                                                                                                                                                                                                                                                                                                                                                                                                                           |
| ["humangutO2.UC40-2_GL0126302 [gene] locus=scaffold82685_2:4602:6173:- [Complete] codon-table.11"]                                                                                                                                                                                                                                                                                                                                                                                                                                                                                                                                                                                                                                                                                                                                                                                                                                                                                                                             |
| ["humangutO2.UC41-0_GL0074405 [gene] locus=scaffold59061_9:3:662:- [Lack 3'-end] codon-table.11"]                                                                                                                                                                                                                                                                                                                                                                                                                                                                                                                                                                                                                                                                                                                                                                                                                                                                                                                              |
| ["humangutO2.UC43-0_GL0024596 [gene] locus=scaffold4362_14:3340:4506:+ [Complete] codon-table.11"]                                                                                                                                                                                                                                                                                                                                                                                                                                                                                                                                                                                                                                                                                                                                                                                                                                                                                                                             |
| ["humangutO2.UC47-1_GL0106516 [gene] locus=scaffold31155_4:560:1333:+ [Lack 3'-end] codon-table.11"]                                                                                                                                                                                                                                                                                                                                                                                                                                                                                                                                                                                                                                                                                                                                                                                                                                                                                                                           |
| ["humangutO2.UC48-1_GL0200602 [gene] locus=scaffold21500_3:1:657:- [Lack both ends] codon-table.11"]                                                                                                                                                                                                                                                                                                                                                                                                                                                                                                                                                                                                                                                                                                                                                                                                                                                                                                                           |
| ["humangutO2.UC52-0_GL0007460 [gene] locus=scaffold34267_4:3:749:+ [Lack both ends] codon-table.11"]                                                                                                                                                                                                                                                                                                                                                                                                                                                                                                                                                                                                                                                                                                                                                                                                                                                                                                                           |
| ["humangutO2.UC58-0_GL0099707 [gene] locus=scaffold28582_3:1:507:+ [Lack both ends] codon-table.11"]                                                                                                                                                                                                                                                                                                                                                                                                                                                                                                                                                                                                                                                                                                                                                                                                                                                                                                                           |
| ["humangutO2.UC58-0_GL0144409 [gene] locus=scaffold28582_4:1:540:+ [Lack both ends] codon-table.11"]                                                                                                                                                                                                                                                                                                                                                                                                                                                                                                                                                                                                                                                                                                                                                                                                                                                                                                                           |
| ["humangutO2.UC9-1_GL0104818 [gene] locus=scaffold69048_7:3:1283:+ [Lack 5'-end] codon-table.11"]                                                                                                                                                                                                                                                                                                                                                                                                                                                                                                                                                                                                                                                                                                                                                                                                                                                                                                                              |
| ["humangutSZEY-40A_GL0052629 [gene] locus=scaffold986_10:2:799:+ [Lack 5'-end] codon-table.11",<br>"pigPIG_189_GL0107784 [gene] locus=scaffold39191_1:3:800:+ [Lack 5'-end] codon-table.11"]                                                                                                                                                                                                                                                                                                                                                                                                                                                                                                                                                                                                                                                                                                                                                                                                                                   |
| ["humangutSZEY-66A_GL0034879 [gene] locus=scaffold34398_2:1:651:- [Lack both ends] codon-table.11"]                                                                                                                                                                                                                                                                                                                                                                                                                                                                                                                                                                                                                                                                                                                                                                                                                                                                                                                            |
| ["humangutSZEY-69A_GL0075907 [gene] locus=scaffold5091_8:404:1294:- [Lack 5'-end] codon-table.11"]                                                                                                                                                                                                                                                                                                                                                                                                                                                                                                                                                                                                                                                                                                                                                                                                                                                                                                                             |
| ["humangutSZEY-79A_GL0078725 [gene] locus=scaffold32900_2:2:742:- [Lack 3'-end] codon-table.11"]                                                                                                                                                                                                                                                                                                                                                                                                                                                                                                                                                                                                                                                                                                                                                                                                                                                                                                                               |
| ["humangutT2D-49A_GL0008767 [gene] locus=scaffold50534_1:5529:6788:+ [Complete] codon-table.11"]                                                                                                                                                                                                                                                                                                                                                                                                                                                                                                                                                                                                                                                                                                                                                                                                                                                                                                                               |
| ["humangutT2D-62A_GL0033315 [gene] locus=scaffold1006_10:662:1849:+ [Complete] codon-table.11",<br>"mouseG1-1A_GL0067551 [gene] locus=scaffold50327_3:1192:2379:- [Complete] codon-table.11",<br>"mouse20_GL0137765 [gene] locus=scaffold37707_1:9311:10498:- [Complete] codon-table.11",<br>"mouse2-2_GL0113805 [gene] locus=scaffold7847_23:1534:2721:+ [Complete] codon-table.11",<br>"mouse35_GL0008207 [gene] locus=scaffold1654_3:2226:3413:+ [Complete] codon-table.11",<br>"mouse6-2_GL0012583 [gene] locus=scaffold27665_1:85621:86808:- [Complete] codon-table.11",<br>"pigPIG_155_GL0209039 [gene] locus=scaffold258678_1:893:2080:- [Lack 5'-end] codon-table.11",<br>"pigPIG_203_GL0040935 [gene] locus=scaffold36594_20:6579:7766:+ [Complete] codon-table.11",<br>"rumen583_GL0089164_1 [gene] locus=scaffold62306_4:3479:4666:+[Complete]",<br>"rumen554_GL1823487_1 [gene] locus=scaffold1579573_1:2949:4136:-[Complete]",<br>"rumen2009040_GL1448770_1 [gene] locus=scaffold1685413_3:281:1468:-[Complete]"] |
| ["humangutT2D-63A_GL0039325 [gene] locus=scaffold25495_1:3:527:+ [Lack both ends] codon-table.11"]                                                                                                                                                                                                                                                                                                                                                                                                                                                                                                                                                                                                                                                                                                                                                                                                                                                                                                                             |
| ["humangutV1.CD15-3_GL0028475 [gene] locus=scaffold15479_33:3328:4536:+ [Complete] codon-table.11"]                                                                                                                                                                                                                                                                                                                                                                                                                                                                                                                                                                                                                                                                                                                                                                                                                                                                                                                            |
| ["humangutV1.CD2-0-PT_GL0057437 [gene] locus=scaffold8057_11:3687:4205:- [Lack 5'-end] codon-table.11"]                                                                                                                                                                                                                                                                                                                                                                                                                                                                                                                                                                                                                                                                                                                                                                                                                                                                                                                        |
| ["humangutV1.CD38-0_GL0186310 [gene] locus=scaffold47721_3:5732:6916:+ [Complete] codon-table.11"]                                                                                                                                                                                                                                                                                                                                                                                                                                                                                                                                                                                                                                                                                                                                                                                                                                                                                                                             |
| ["humangutV1.CD40-0_GL0148977 [gene] locus=scaffold16169_1:575:1327:- [Lack 5'-end] codon-table.11",<br>"rumen7049_GL1876747_1 [gene] locus=scaffold688033_1:280:1032:-[Lack 5'-end]"]                                                                                                                                                                                                                                                                                                                                                                                                                                                                                                                                                                                                                                                                                                                                                                                                                                         |
| ["humangutV1.CD40-0_GL0163227 [gene] locus=scaffold16169_2:2:385:- [Lack 3'-end] codon-table.11",<br>"rumen7049_GL1900126_1 [gene] locus=scaffold286734_1:2:385:-[Lack 3'-end]"]                                                                                                                                                                                                                                                                                                                                                                                                                                                                                                                                                                                                                                                                                                                                                                                                                                               |
| ["humangutV1.CD48-0_GL0049853 [gene] locus=scaffold21729_1:2:757:- [Lack both ends] codon-table.11"]                                                                                                                                                                                                                                                                                                                                                                                                                                                                                                                                                                                                                                                                                                                                                                                                                                                                                                                           |
| ["humangutV1.CD53-0_GL0063667 [gene] locus=scaffold17550_7:7770:8960:+ [Complete] codon-table.11",<br>"mouse1A-dyr3-06_GL0048311 [gene] locus=scaffold4151_1:56118:57308:- [Complete] codon-table.11",                                                                                                                                                                                                                                                                                                                                                                                                                                                                                                                                                                                                                                                                                                                                                                                                                         |

|                                                                                                                                                                                                                                                                                                                                                                                                                                                            |
|------------------------------------------------------------------------------------------------------------------------------------------------------------------------------------------------------------------------------------------------------------------------------------------------------------------------------------------------------------------------------------------------------------------------------------------------------------|
| "cazygi 938475461 gb ALJ39693.1  4-O-beta-D-mannosyl-D-glucose phosphorylase [Bacteroides thetaiotaomicron]",<br>"cazygi 29340341 gb AAO78134.1  putative glycosylase [Bacteroides thetaiotaomicron VPI-5482]"                                                                                                                                                                                                                                             |
| ["humangutV1.CD6-0-PT_GL0073017 [gene] locus=scaffold127996_2:9399:10625:+ [Complete] codon-table.11",<br>"rumen552_GL0764241_1 [gene] locus=scaffold492656_2:1179:2405:+[Complete]"]                                                                                                                                                                                                                                                                      |
| ["humangutV1.FI03_GL0003294 [gene] locus=C977374_1:2:394:- [Lack 3'-end] codon-table.11"]                                                                                                                                                                                                                                                                                                                                                                  |
| ["humangutV1.FI14_GL0257660 [gene] locus=scaffold84882_5:1:1053:- [Lack 3'-end] codon-table.11"]                                                                                                                                                                                                                                                                                                                                                           |
| ["humangutV1.FI16_GL0184215 [gene] locus=scaffold3794_11:2:616:+ [Lack 5'-end] codon-table.11",<br>"pigPIG_204_GL0014757 [gene] locus=scaffold104647_12:1:615:+ [Lack 5'-end] codon-table.11"]                                                                                                                                                                                                                                                             |
| ["humangutV1.FI27_GL0059160 [gene] locus=scaffold234_7:9683:10894:- [Lack 5'-end] codon-table.11"]                                                                                                                                                                                                                                                                                                                                                         |
| ["humangutV1.FI27_GL0066186 [gene] locus=scaffold83213_2:2:1183:+ [Lack 5'-end] codon-table.11",<br>"humangut763536994-stool2_revised_scaffold69911_4_gene146893 strand:+ start:3 stop:1184 length:1182 start_codon:no stop_codon:yes gene_type:incomplete [Lack 5'-end] codon-table.11",<br>"mouseS-Fe10_GL0165818 [gene] locus=scaffold65784_1:21413:22594:+ [Complete] codon-table.11"]                                                                 |
| ["humangutV1.FI28_GL0079660 [gene] locus=scaffold56031_13:1:615:+ [Lack 5'-end] codon-table.11"]                                                                                                                                                                                                                                                                                                                                                           |
| ["humangutV1.FI28_GL0152998 [gene] locus=scaffold41976_2:6995:7672:- [Complete] codon-table.11"]                                                                                                                                                                                                                                                                                                                                                           |
| ["humangutV1.UC10-2_GL0174527 [gene] locus=scaffold31422_1:4720:5499:+ [Complete] codon-table.11"]                                                                                                                                                                                                                                                                                                                                                         |
| ["humangutV1.UC10-2_GL0175130 [gene] locus=scaffold12243_18:2991:4220:+ [Lack 3'-end] codon-table.11",<br>"rumen554_GL1492779_1 [gene] locus=scaffold1360138_2:8350:9582:+[Complete]"]                                                                                                                                                                                                                                                                     |
| ["humangutV1.UC11-5_GL0014113 [gene] locus=scaffold14897_18:2462:3118:+ [Lack 3'-end] codon-table.11",<br>"rumen2009040_GL0388548_1 [gene] locus=scaffold1851692_1:371:1027:+[Lack 3'-end]"]                                                                                                                                                                                                                                                               |
| ["humangutV1.UC11-5_GL0059799 [gene] locus=scaffold5864_5:1:645:+ [Lack both ends] codon-table.11"]                                                                                                                                                                                                                                                                                                                                                        |
| ["humangutV1.UC17-2_GL0111873 [gene] locus=scaffold51891_2:1:702:- [Lack both ends] codon-table.11",<br>"rumen552_GL0685303_1 [gene] locus=scaffold854013_3:68:772:-[Lack 5'-end]"]                                                                                                                                                                                                                                                                        |
| ["humangutV1.UC26-4_GL0151511 [gene] locus=scaffold63765_2:1965:3146:- [Complete] codon-table.11"]                                                                                                                                                                                                                                                                                                                                                         |
| ["humangutV1.UC34-0_GL0105732 [gene] locus=scaffold11144_1:7:1209:- [Lack 5'-end] codon-table.11",<br>"mouse1-6_GL0039815 [gene] locus=scaffold13603_1:237:1439:+ [Complete] codon-table.11",<br>"mouse3-8_GL0031525 [gene] locus=scaffold2846_10:4675:5877:+ [Complete] codon-table.11",<br>"rumen555_GL0654298_1 [gene] locus=scaffold1034900_1:10147:11349:-[Complete]",<br>"rumen555_GL2385602_1 [gene] locus=scaffold283062_4:5069:6271:-[Complete]"] |
| ["humangutV1.UC40-1_GL0150341 [gene] locus=scaffold11381_7:2:514:- [Lack 3'-end] codon-table.11"]                                                                                                                                                                                                                                                                                                                                                          |
| ["humangutV1.UC47-4_GL0163825 [gene] locus=scaffold11314_18:79:1275:- [Complete] codon-table.11",<br>"mouse5-1_GL0006217 [gene] locus=scaffold12825_5:985:2181:- [Complete] codon-table.11",<br>"mouse5-1_GL0032035 [gene] locus=scaffold24858_2:4732:5928:- [Complete] codon-table.11",<br>"rumen553_GL0846782_1 [gene] locus=scaffold2814_1:18038:19234:-[Complete]",<br>"rumen0081_GL0064711_1 [gene] locus=scaffold335362_3:1279:2475:+[Complete]"]    |
| ["mouse1-1_GL0104836 [gene] locus=scaffold12767_20:1545:2723:- [Complete] codon-table.11"]                                                                                                                                                                                                                                                                                                                                                                 |
| ["mouse1A-dyr4-07_GL0092877 [gene] locus=scaffold24445_1:1671:2780:+ [Lack 3'-end] codon-table.11"]                                                                                                                                                                                                                                                                                                                                                        |
| ["mouse2-5_GL0068669 [gene] locus=scaffold23663_4:6848:8095:- [Complete] codon-table.11"]                                                                                                                                                                                                                                                                                                                                                                  |
| ["mouse20_GL0104041 [gene] locus=scaffold1396_4:57:581:+ [Lack 3'-end] codon-table.11"]                                                                                                                                                                                                                                                                                                                                                                    |
| ["mouse20_GL0150465 [gene] locus=scaffold13756_3:4154:5320:+ [Complete] codon-table.11",<br>"rumen553_GL0707227_1 [gene] locus=scaffold102953_3:5352:6518:+[Complete]",<br>"rumen552_GL0099297_1 [gene] locus=scaffold386055_1:171:1337:+[Complete]",<br>"rumen552_GL0252065_1 [gene] locus=scaffold506907_1:373:1539:-[Complete]",                                                                                                                        |

|                                                                                                                                                                                                                                                                                                                                                                                                                                                                                                                                                                                                                                                                                                                                                 |
|-------------------------------------------------------------------------------------------------------------------------------------------------------------------------------------------------------------------------------------------------------------------------------------------------------------------------------------------------------------------------------------------------------------------------------------------------------------------------------------------------------------------------------------------------------------------------------------------------------------------------------------------------------------------------------------------------------------------------------------------------|
| "rumen552_GL0841846_1 [gene] locus=scaffold210469_1:6959:8125:-[Complete]",                                                                                                                                                                                                                                                                                                                                                                                                                                                                                                                                                                                                                                                                     |
| "rumen554_GL1845448_1 [gene] locus=scaffold681740_1:3931:5097:+[Complete]",                                                                                                                                                                                                                                                                                                                                                                                                                                                                                                                                                                                                                                                                     |
| "rumen554_GL2479742_1 [gene] locus=scaffold26282_1:909:2075:-[Complete]",                                                                                                                                                                                                                                                                                                                                                                                                                                                                                                                                                                                                                                                                       |
| "rumen0081_GL1224068_1 [gene] locus=C39762997_1:65:1231:+[Complete]",                                                                                                                                                                                                                                                                                                                                                                                                                                                                                                                                                                                                                                                                           |
| "rumen100058_GL0167877_1 [gene] locus=scaffold3028_5:1451:2617:+[Complete]",                                                                                                                                                                                                                                                                                                                                                                                                                                                                                                                                                                                                                                                                    |
| "rumen100058_GL1244672_1 [gene] locus=scaffold3366082_1:1672:2838:-[Complete]",                                                                                                                                                                                                                                                                                                                                                                                                                                                                                                                                                                                                                                                                 |
| "rumen100058_GL3140985_1 [gene] locus=scaffold798435_2:57:1223:-[Complete]",                                                                                                                                                                                                                                                                                                                                                                                                                                                                                                                                                                                                                                                                    |
| "rumen100058_GL3835232_1 [gene] locus=scaffold1577825_2:672:1838:+[Complete]",                                                                                                                                                                                                                                                                                                                                                                                                                                                                                                                                                                                                                                                                  |
| "rumen2009040_GL1917829_1 [gene] locus=scaffold1594294_1:1937:3103:-[Complete]",                                                                                                                                                                                                                                                                                                                                                                                                                                                                                                                                                                                                                                                                |
| "rumen2009040_GL2269736_1 [gene] locus=scaffold2329482_1:5312:6478:-[Complete]",                                                                                                                                                                                                                                                                                                                                                                                                                                                                                                                                                                                                                                                                |
| "rumen2009040_GL2642793_1 [gene] locus=scaffold1358709_10:662:1828:+[Complete]",                                                                                                                                                                                                                                                                                                                                                                                                                                                                                                                                                                                                                                                                |
| "rumen3042_GL0131095_1 [gene] locus=scaffold2454318_1:356:1522:+[Complete]",                                                                                                                                                                                                                                                                                                                                                                                                                                                                                                                                                                                                                                                                    |
| "rumen3042_GL1485888_1 [gene] locus=scaffold2612311_1:1189:2355:+[Complete]",                                                                                                                                                                                                                                                                                                                                                                                                                                                                                                                                                                                                                                                                   |
| "rumen3042_GL2268688_1 [gene] locus=scaffold1295952_5:2154:3320:-[Complete]"                                                                                                                                                                                                                                                                                                                                                                                                                                                                                                                                                                                                                                                                    |
| ["mouse29_GL0095889 [gene] locus=scaffold46844_2:157:540:- [Lack 5'-end] codon-table.11"]                                                                                                                                                                                                                                                                                                                                                                                                                                                                                                                                                                                                                                                       |
| ["mouse3-6_GL0009578 [gene] locus=scaffold63212_1:6391:7623:- [Complete] codon-table.11"]                                                                                                                                                                                                                                                                                                                                                                                                                                                                                                                                                                                                                                                       |
| ["mouse37_GL0036091 [gene] locus=scaffold36633_1:3:590:+ [Lack both ends] codon-table.11"]                                                                                                                                                                                                                                                                                                                                                                                                                                                                                                                                                                                                                                                      |
| ["mouse4-3_GL0027379 [gene] locus=scaffold23007_5:1:666:- [Lack 3'-end] codon-table.11",<br>"rumen2009040_GL0697873_1 [gene] locus=scaffold2007056_1:2:667:+[Lack both ends]"                                                                                                                                                                                                                                                                                                                                                                                                                                                                                                                                                                   |
| ["mouse4-7_GL0053583 [gene] locus=scaffold24657_2:1473:2186:+ [Complete] codon-table.11"]                                                                                                                                                                                                                                                                                                                                                                                                                                                                                                                                                                                                                                                       |
| ["mouse40_GL0003047 [gene] locus=scaffold3733_5:2:871:+ [Lack 5'-end] codon-table.11"]                                                                                                                                                                                                                                                                                                                                                                                                                                                                                                                                                                                                                                                          |
| ["mouse52_GL0066171 [gene] locus=C1229355_1:1236:2558:- [Complete] codon-table.11"]                                                                                                                                                                                                                                                                                                                                                                                                                                                                                                                                                                                                                                                             |
| ["mouse7-5_GL0099089 [gene] locus=scaffold62478_1:1999:3198:- [Complete] codon-table.11"]                                                                                                                                                                                                                                                                                                                                                                                                                                                                                                                                                                                                                                                       |
| ["mouse8-1_GL0096154 [gene] locus=scaffold21121_4:3:887:- [Lack both ends] codon-table.11"]                                                                                                                                                                                                                                                                                                                                                                                                                                                                                                                                                                                                                                                     |
| ["mouse8-2_GL0031752 [gene] locus=scaffold30695_2:1:642:+ [Lack 5'-end] codon-table.11"]                                                                                                                                                                                                                                                                                                                                                                                                                                                                                                                                                                                                                                                        |
| ["mouse8-2_GL0086414 [gene] locus=scaffold30695_1:1313:1804:+ [Lack 3'-end] codon-table.11"]                                                                                                                                                                                                                                                                                                                                                                                                                                                                                                                                                                                                                                                    |
| ["mouse8-3_GL0003506 [gene] locus=scaffold64522_1:9192:10358:+ [Complete] codon-table.11",<br>"pigPIG_161_GL0158104 [gene] locus=scaffold37546_2:2713:3879:+ [Complete] codon-table.11",<br>"pigDB-11B_GL0076554 [gene] locus=scaffold24_2:33303:34469:+ [Complete] codon-table.11",<br>"pigDB-511B_GL0014654 [gene] locus=scaffold67850_2:1964:3130:- [Complete] codon-table.11",<br>"pigEYZ-120B_GL0301365 [gene] locus=scaffold51536_3:3060:4226:- [Complete] codon-table.11",<br>"rumen583_GL0021794_1 [gene] locus=C5676937_1:4700:5866:+[Complete]",<br>"rumen3042_GL2088050_1 [gene] locus=scaffold525157_3:49:1212:+[Lack 3'-end]",<br>"cazygii326543192(gb)ADZ85051.1] glycosidase related protein [Clostridium lentocellum DSM 5427]" |
| ["mouseG1-1A_GL0035773 [gene] locus=scaffold23651_3:32:697:- [Lack 5'-end] codon-table.11",<br>"rumen2009040_GL1823158_1 [gene] locus=scaffold2243758_1:2418:3083:-[Lack 5'-end]"                                                                                                                                                                                                                                                                                                                                                                                                                                                                                                                                                               |
| ["mouseG1-2A_GL0065747 [gene] locus=scaffold47004_3:1:561:- [Lack 3'-end] codon-table.11"]                                                                                                                                                                                                                                                                                                                                                                                                                                                                                                                                                                                                                                                      |
| ["mouseG1-3A_GL0079207 [gene] locus=scaffold49653_6:1:858:+ [Lack 5'-end] codon-table.11"]                                                                                                                                                                                                                                                                                                                                                                                                                                                                                                                                                                                                                                                      |
| ["mouseG1-6A_GL0052078 [gene] locus=scaffold27249_7:1024:1536:- [Lack 5'-end] codon-table.11",<br>"rumen100058_GL0670777_1 [gene] locus=scaffold2791858_1:1:513:+[Lack 5'-end]"                                                                                                                                                                                                                                                                                                                                                                                                                                                                                                                                                                 |
| ["mouseG1-6A_GL0052079 [gene] locus=scaffold27249_8:1:549:- [Lack 3'-end] codon-table.11"]                                                                                                                                                                                                                                                                                                                                                                                                                                                                                                                                                                                                                                                      |
| ["mouseG1-6A_GL0074666 [gene] locus=scaffold41234_6:2:790:- [Lack 3'-end] codon-table.11"]                                                                                                                                                                                                                                                                                                                                                                                                                                                                                                                                                                                                                                                      |
| ["mouseGroup2-2A_GL0060717 [gene] locus=scaffold39236_3:2263:3501:- [Complete] codon-table.11"]                                                                                                                                                                                                                                                                                                                                                                                                                                                                                                                                                                                                                                                 |

|                                                                                                                                                                                                                                                                               |
|-------------------------------------------------------------------------------------------------------------------------------------------------------------------------------------------------------------------------------------------------------------------------------|
| ["mouseGroup2-3A_GL0015006 [gene] locus=scaffold3514_12:60:842:- [Lack 5'-end] codon-table.11"]                                                                                                                                                                               |
| ["mouseGroup2-3A_GL0026300 [gene] locus=scaffold9194_7:1:609:- [Lack 3'-end] codon-table.11"]                                                                                                                                                                                 |
| ["mouseGroup2-4A_GL0130929 [gene] locus=scaffold114663_1:1:513:+ [Lack 5'-end] codon-table.11"]                                                                                                                                                                               |
| ["mouseGroup2-5A_GL0103129 [gene] locus=scaffold70021_2:2:925:- [Lack 3'-end] codon-table.11",<br>"rumen2009040_GL1397020_1 [gene] locus=scaffold626237_1:3:926:-[Lack 3'-end]"]                                                                                              |
| ["mouseGroup2-8A_GL0147181 [gene] locus=scaffold121907_8:1339:1806:- [Lack 5'-end] codon-table.11",<br>"rumen553_GL0852252_1 [gene] locus=scaffold112080_3:2:469:+[Lack 5'-end]",<br>"rumen554_GL2300168_1 [gene] locus=scaffold792886_4:3:470:+[Lack 5'-end]"]               |
| ["mouseGroup2-8A_GL0147182 [gene] locus=scaffold121907_9:2:688:- [Lack 3'-end] codon-table.11",<br>"mouse8-6_GL0028013 [gene] locus=scaffold62741_1:47:733:+ [Lack 3'-end] codon-table.11"]                                                                                   |
| ["mouseMC-0-1_GL0110427 [gene] locus=scaffold96537_1:2:598:- [Lack both ends] codon-table.11",<br>"rumen552_GL1573339_1 [gene] locus=scaffold785128_1:2:598:+[Lack both ends]"]                                                                                               |
| ["mouseMC-6-1_GL0074889 [gene] locus=scaffold49658_1:281:1348:+ [Lack 3'-end] codon-table.11",<br>"rumen553_GL0598341_1 [gene] locus=scaffold368919_2:1130:2200:-[Lack 5'-end]"]                                                                                              |
| ["mouseMC-6-2_GL0115419 [gene] locus=scaffold91199_2:2:652:- [Lack both ends] codon-table.11"]                                                                                                                                                                                |
| ["mouseMC-6-2_GL0152441 [gene] locus=scaffold122298_1:1:663:+ [Lack 5'-end] codon-table.11",<br>"rumen554_GL0411802_1 [gene] locus=scaffold1143481_1:1:663:+[Lack 5'-end]",<br>"rumen0081_GL0859080_1 [gene] locus=scaffold697899_2:2:664:+[Lack 5'-end]"]                    |
| ["mouseMC-6-3_GL0095494 [gene] locus=scaffold70992_2:8783:9967:+ [Complete] codon-table.11"]                                                                                                                                                                                  |
| ["mouseMC-6-4_GL0117573 [gene] locus=scaffold83323_2:2:550:+ [Lack 5'-end] codon-table.11",<br>"rumen100058_GL3004017_1 [gene] locus=scaffold1710841_1:2:550:+[Lack 5'-end]"]                                                                                                 |
| ["mouseMH-6-2_GL0099477 [gene] locus=scaffold78797_3:6912:8150:+ [Complete] codon-table.11"]                                                                                                                                                                                  |
| ["mouseS-Fe11_GL0022259 [gene] locus=scaffold14952_1:3063:4277:- [Complete] codon-table.11",<br>"rumen0081_GL1908540_1 [gene] locus=scaffold4735_6:1749:2963:+[Complete]"]                                                                                                    |
| ["mouseS-Fe12_GL0125823 [gene] locus=scaffold37891_1:1:507:- [Lack 3'-end] codon-table.11"]                                                                                                                                                                                   |
| ["mouseS-Fe20_GL0157906 [gene] locus=scaffold87368_1:2:643:+ [Lack both ends] codon-table.11",<br>"pigPIG_144_GL0269360 [gene] locus=scaffold71900_2:3:644:+ [Lack both ends] codon-table.11",<br>"rumen7049_GL0142595_1 [gene] locus=scaffold374494_2:2:646:+[Lack 5'-end]"] |
| ["mouseS-Fe20_GL0184469 [gene] locus=scaffold103466_2:3:581:- [Lack both ends] codon-table.11"]                                                                                                                                                                               |
| ["mouseS-Fe2_GL0149456 [gene] locus=scaffold6259_8:1:981:- [Lack 3'-end] codon-table.11",<br>"mouseG1-5A_GL0120339 [gene] locus=scaffold84034_12:1:984:+ [Lack 5'-end] codon-table.11"]                                                                                       |
| ["mouseS-Fe3_GL0012630 [gene] locus=scaffold109608_3:2:457:- [Lack 3'-end] codon-table.11"]                                                                                                                                                                                   |
| ["mouseS-Fe3_GL0182180 [gene] locus=scaffold5576_11:291:743:- [Lack 5'-end] codon-table.11"]                                                                                                                                                                                  |
| ["mouseS-Fe8_GL0062201 [gene] locus=C1788575_1:2:754:+ [Lack both ends] codon-table.11"]                                                                                                                                                                                      |
| ["mouseS-Fe8_GL0076295 [gene] locus=scaffold44585_1:12619:14178:+ [Complete] codon-table.11"]                                                                                                                                                                                 |
| ["mouseS-Fe9_GL0254040 [gene] locus=scaffold105458_7:1:627:- [Lack both ends] codon-table.11"]                                                                                                                                                                                |
| ["pigBHZ-10B_GL0256708 [gene] locus=scaffold5679_1:1304:2524:+ [Complete] codon-table.11"]                                                                                                                                                                                    |
| ["pigBHZ-11B_GL0034540 [gene] locus=scaffold196728_2:128305:129498:+ [Complete] codon-table.11"]                                                                                                                                                                              |
| ["pigBHZ-2B_GL0075359 [gene] locus=scaffold166132_1:1:945:- [Lack 3'-end] codon-table.11",<br>"rumen2009040_GL1807090_1 [gene] locus=scaffold2927015_1:1:945:+[Lack both ends]"]                                                                                              |
| ["pigBHZ-4B_GL0153379 [gene] locus=scaffold164132_1:214:951:- [Lack 5'-end] codon-table.11"]                                                                                                                                                                                  |
| ["pigBHZ-4B_GL0202887 [gene] locus=scaffold22706_2:2:562:+ [Lack 5'-end] codon-table.11",<br>"rumen554_GL2975678_1 [gene] locus=scaffold2182415_1:1:561:+[Lack 5'-end]"]                                                                                                      |

|                                                                                                                                                                                                                                                                                                                                                                                                                                                                                                                               |
|-------------------------------------------------------------------------------------------------------------------------------------------------------------------------------------------------------------------------------------------------------------------------------------------------------------------------------------------------------------------------------------------------------------------------------------------------------------------------------------------------------------------------------|
| ["pigBHZ-6B_GL0161101 [gene] locus=scaffold99203_1:2:1084:- [Lack both ends] codon-table.11"]                                                                                                                                                                                                                                                                                                                                                                                                                                 |
| ["pigBHZ-9B_GL0092637 [gene] locus=scaffold5837_1:1:1107:- [Lack 3'-end] codon-table.11"]                                                                                                                                                                                                                                                                                                                                                                                                                                     |
| ["pigBMZ-17B_GL0022145 [gene] locus=scaffold116002_7:430:1446:+ [Lack 3'-end] codon-table.11"]                                                                                                                                                                                                                                                                                                                                                                                                                                |
| ["pigBMZ-17B_GL0100030 [gene] locus=scaffold91060_1:2:724:- [Lack both ends] codon-table.11"]                                                                                                                                                                                                                                                                                                                                                                                                                                 |
| ["pigBMZ-2B_GL0014517 [gene] locus=scaffold50928_4:3:719:- [Lack 3'-end] codon-table.11"]                                                                                                                                                                                                                                                                                                                                                                                                                                     |
| ["pigDB-510B_GL0212637 [gene] locus=scaffold32625_4:1595:2266:- [Lack 5'-end] codon-table.11"]                                                                                                                                                                                                                                                                                                                                                                                                                                |
| ["pigDB-517B_GL0101001 [gene] locus=scaffold127221_1:75:512:+ [Lack 3'-end] codon-table.11"]                                                                                                                                                                                                                                                                                                                                                                                                                                  |
| ["pigEYZ-183B_GL0159281 [gene] locus=scaffold18455_2:1:555:+ [Lack both ends] codon-table.11",<br>"rumen100058_GL1180685_1 [gene] locus=scaffold1351010_1:3:557:-[Lack both ends]",<br>"rumen100058_GL3225001_1 [gene] locus=scaffold1584546_2:2:556:+[Lack both ends]",<br>"rumen2009040_GL0483093_1 [gene] locus=C53189378_1:1:555:-[Lack both ends]"]                                                                                                                                                                      |
| ["pigEYZ-192B_GL0068258 [gene] locus=scaffold123997_1:819:2030:- [Complete] codon-table.11"]                                                                                                                                                                                                                                                                                                                                                                                                                                  |
| ["pigEYZ-378B_GL0169238 [gene] locus=scaffold93268_4:1:903:- [Lack both ends] codon-table.11"]                                                                                                                                                                                                                                                                                                                                                                                                                                |
| ["pigEYZ-381B_GL0163816 [gene] locus=scaffold205315_1:426:896:- [Lack 5'-end] codon-table.11"]                                                                                                                                                                                                                                                                                                                                                                                                                                |
| ["pigEYZ-468B_GL0016892 [gene] locus=scaffold59667_1:1:576:- [Lack both ends] codon-table.11",<br>"rumen555_GL0499687_1 [gene] locus=scaffold1402685_1:3:581:+[Lack 5'-end]",<br>"rumen2009040_GL3653300_1 [gene] locus=scaffold2933610_1:1:579:+[Lack 5'-end]"]                                                                                                                                                                                                                                                              |
| ["pigEYZ-566B_GL0134779 [gene] locus=C1416983_1:3:815:- [Lack 3'-end] codon-table.11"]                                                                                                                                                                                                                                                                                                                                                                                                                                        |
| ["pigEYZ-592B_GL0151096 [gene] locus=scaffold37532_1:1:549:+ [Lack both ends] codon-table.11",<br>"rumen2009040_GL1991920_1 [gene] locus=scaffold764530_6:3:551:-[Lack both ends]"]                                                                                                                                                                                                                                                                                                                                           |
| ["pigEYZ-611B_GL0059729 [gene] locus=scaffold133290_2:3:647:- [Lack 3'-end] codon-table.11"]                                                                                                                                                                                                                                                                                                                                                                                                                                  |
| ["pigEYZ-615B_GL0085856 [gene] locus=scaffold39063_1:33:638:+ [Lack 3'-end] codon-table.11"]                                                                                                                                                                                                                                                                                                                                                                                                                                  |
| ["pigEYZ-652B_GL0050351 [gene] locus=scaffold127622_2:780:1364:- [Lack 5'-end] codon-table.11"]                                                                                                                                                                                                                                                                                                                                                                                                                               |
| ["pigPIG-001_GL0084092 [gene] locus=scaffold112621_2:23174:24376:+ [Complete] codon-table.11",<br>"pigPIG-027_GL0132459 [gene] locus=scaffold13426_11:2576:3778:- [Lack 5'-end] codon-table.11",<br>"rumen552_GL1686014_1 [gene] locus=scaffold446346_1:657:1859:+[Complete]",<br>"rumen554_GL2104050_1 [gene] locus=scaffold102241_1:336:1538:-[Complete]",<br>"rumen0081_GL1300854_1 [gene] locus=scaffold1788767_2:1976:3178:+[Complete]",<br>"rumen7049_GL2676190_1 [gene] locus=scaffold766563_7:6575:7777:+[Complete]"] |
| ["pigPIG-006_GL0003381 [gene] locus=scaffold79667_1:3:761:- [Lack 3'-end] codon-table.11"]                                                                                                                                                                                                                                                                                                                                                                                                                                    |
| ["pigPIG-006_GL0107362 [gene] locus=scaffold102332_1:1:774:- [Lack both ends] codon-table.11",<br>"rumen553_GL0437579_1 [gene] locus=scaffold66463_1:5117:5893:-[Lack 5'-end]"]                                                                                                                                                                                                                                                                                                                                               |
| ["pigPIG-007_GL0170892 [gene] locus=scaffold36575_5:2:367:+ [Lack 5'-end] codon-table.11"]                                                                                                                                                                                                                                                                                                                                                                                                                                    |
| ["pigPIG-007_GL0195730 [gene] locus=scaffold36575_3:369:887:+ [Lack 3'-end] codon-table.11"]                                                                                                                                                                                                                                                                                                                                                                                                                                  |
| ["pigPIG-011_GL0208843 [gene] locus=scaffold104732_1:3:527:+ [Lack both ends] codon-table.11"]                                                                                                                                                                                                                                                                                                                                                                                                                                |
| ["pigPIG-011_GL0212040 [gene] locus=scaffold8823_3:5184:6383:- [Complete] codon-table.11",<br>"rumen554_GL0552620_1 [gene] locus=scaffold2138255_1:199:1398:-[Complete]",<br>"rumen554_GL0776369_1 [gene] locus=scaffold28152_2:6087:7286:+[Complete]",<br>"rumen100058_GL3148890_1 [gene] locus=scaffold478250_2:747:1946:+[Complete]",<br>"rumen2009040_GL3531659_1 [gene] locus=scaffold283956_1:47:1246:-[Complete]",<br>"rumen3042_GL2020338_1 [gene] locus=scaffold2076113_1:2611:3810:-[Complete]"]                    |
| ["pigPIG-012_GL0150881 [gene] locus=scaffold35901_1:1:729:+ [Lack both ends] codon-table.11",<br>"rumen100058_GL1430674_1 [gene] locus=scaffold1928015_2:409:1137:+[Lack 3'-end]"]                                                                                                                                                                                                                                                                                                                                            |

|                                                                                                                                                                                                                                                                                                                                                                                                                                                                                                                                                                                                                                                                                                                                                                                                                                                                                                                                                                                                                                                                                                                                                                                                                                                                                                                                                                                                                                                                                                                                                                                                                                                                                                                                                                                                                                               |
|-----------------------------------------------------------------------------------------------------------------------------------------------------------------------------------------------------------------------------------------------------------------------------------------------------------------------------------------------------------------------------------------------------------------------------------------------------------------------------------------------------------------------------------------------------------------------------------------------------------------------------------------------------------------------------------------------------------------------------------------------------------------------------------------------------------------------------------------------------------------------------------------------------------------------------------------------------------------------------------------------------------------------------------------------------------------------------------------------------------------------------------------------------------------------------------------------------------------------------------------------------------------------------------------------------------------------------------------------------------------------------------------------------------------------------------------------------------------------------------------------------------------------------------------------------------------------------------------------------------------------------------------------------------------------------------------------------------------------------------------------------------------------------------------------------------------------------------------------|
| <p>["pigPIG-017_GL0017516 [gene] locus=scaffold1616_2:2136:3302:- [Complete] codon-table.11",</p> <p>"rumen553_GL0501507_1 [gene] locus=scaffold34527_2:1421:2587:-[Complete]",</p> <p>"rumen552_GL1485570_1 [gene] locus=scaffold626980_2:57117:58283:+[Complete]",</p> <p>"rumen554_GL2211671_1 [gene] locus=scaffold33847_1:259:1425:-[Complete]",</p> <p>"rumen554_GL2600831_1 [gene] locus=scaffold204795_1:106:1272:-[Complete]",</p> <p>"rumen554_GL2810335_1 [gene] locus=scaffold231054_2:583:1749:+[Complete]",</p> <p>"rumen554_GL2910917_1 [gene] locus=scaffold542701_1:195:1361:-[Complete]",</p> <p>"rumen554_GL3157872_1 [gene] locus=scaffold2075507_2:3659:4825:+[Complete]",</p> <p>"rumen555_GL1580309_1 [gene] locus=scaffold1536785_1:11780:12946:-[Complete]",</p> <p>"rumen0081_GL0263207_1 [gene] locus=scaffold99592_1:7085:8251:-[Complete]",</p> <p>"rumen0081_GL0480546_1 [gene] locus=scaffold156774_3:149:1315:+[Complete]",</p> <p>"rumen0081_GL2110370_1 [gene] locus=scaffold786666_4:1519:2685:-[Complete]",</p> <p>"rumen0081_GL2298606_1 [gene] locus=scaffold34203_1:538:1704:+[Complete]",</p> <p>"rumen100058_GL1773084_1 [gene] locus=scaffold740572_1:843:2009:-[Complete]",</p> <p>"rumen100058_GL2010090_1 [gene] locus=scaffold1257179_4:532:1698:-[Complete]",</p> <p>"rumen100058_GL2011063_1 [gene] locus=C60783253_1:304:1470:+[Complete]",</p> <p>"rumen100058_GL2237142_1 [gene] locus=scaffold1037187_1:3721:4887:-[Complete]",</p> <p>"rumen2009040_GL0521284_1 [gene] locus=scaffold147283_2:24:1190:+[Complete]",</p> <p>"rumen2009040_GL1349272_1 [gene] locus=scaffold530263_1:1070:2236:-[Complete]",</p> <p>"rumen2009040_GL3530282_1 [gene] locus=scaffold23780_1:1175:2341:+[Complete]",</p> <p>"rumen3042_GL1010274_1 [gene] locus=scaffold2404816_1:6147:7313:+[Complete]"</p> |
| <p>["pigPIG-017_GL0172359 [gene] locus=scaffold29954_2:919:2100:- [Lack 5'-end] codon-table.11",</p> <p>"rumen552_GL1525844_1 [gene] locus=scaffold131085_2:215:1396:-[Complete]",</p> <p>"rumen554_GL1096797_1 [gene] locus=scaffold1746292_1:892:2073:+[Complete]",</p> <p>"rumen555_GL0162025_1 [gene] locus=scaffold479522_1:1260:2441:+[Complete]",</p> <p>"rumen0081_GL0761903_1 [gene] locus=scaffold55494_2:553:1734:+[Complete]",</p> <p>"rumen100058_GL1839944_1 [gene] locus=scaffold12460_1:2683:3864:-[Lack 5'-end]",</p> <p>"rumen2009040_GL0867123_1 [gene] locus=scaffold2352423_1:6:1187:-[Complete]",</p> <p>"rumen3042_GL0391091_1 [gene] locus=scaffold10271_2:481:1662:+[Complete]",</p> <p>"rumen3042_GL1303090_1 [gene] locus=scaffold370611_1:53:1234:-[Lack 5'-end]",</p> <p>"rumen3042_GL1591543_1 [gene] locus=scaffold1583907_4:399:1580:-[Complete]"</p>                                                                                                                                                                                                                                                                                                                                                                                                                                                                                                                                                                                                                                                                                                                                                                                                                                                                                                                                                         |
| <p>["pigPIG-018_GL0014696 [gene] locus=scaffold119816_1:3:533:- [Lack 3'-end] codon-table.11"]</p>                                                                                                                                                                                                                                                                                                                                                                                                                                                                                                                                                                                                                                                                                                                                                                                                                                                                                                                                                                                                                                                                                                                                                                                                                                                                                                                                                                                                                                                                                                                                                                                                                                                                                                                                            |
| <p>["pigPIG-020_GL0005672 [gene] locus=scaffold105618_4:3794:4963:+ [Complete] codon-table.11",</p> <p>"rumen3042_GL2582720_1 [gene] locus=scaffold484113_2:12530:13699:-[Complete]",</p> <p>"rumen7049_GL1546302_1 [gene] locus=scaffold92776_6:167:1336:+[Complete]"</p>                                                                                                                                                                                                                                                                                                                                                                                                                                                                                                                                                                                                                                                                                                                                                                                                                                                                                                                                                                                                                                                                                                                                                                                                                                                                                                                                                                                                                                                                                                                                                                    |
| <p>["pigPIG-020_GL0035751 [gene] locus=scaffold174384_1:3:584:+ [Lack both ends] codon-table.11"]</p>                                                                                                                                                                                                                                                                                                                                                                                                                                                                                                                                                                                                                                                                                                                                                                                                                                                                                                                                                                                                                                                                                                                                                                                                                                                                                                                                                                                                                                                                                                                                                                                                                                                                                                                                         |
| <p>["pigPIG-023_GL0023071 [gene] locus=scaffold65895_1:1:573:- [Lack both ends] codon-table.11",</p> <p>"rumen100058_GL0477677_1 [gene] locus=C58269829_1:3:575:-[Lack 3'-end]"</p>                                                                                                                                                                                                                                                                                                                                                                                                                                                                                                                                                                                                                                                                                                                                                                                                                                                                                                                                                                                                                                                                                                                                                                                                                                                                                                                                                                                                                                                                                                                                                                                                                                                           |
| <p>["pigPIG-026_GL0007526 [gene] locus=scaffold105900_1:1:651:+ [Lack 5'-end] codon-table.11",</p> <p>"rumen553_GL0303320_1 [gene] locus=scaffold398815_2:2:652:+[Lack 5'-end]",</p> <p>"rumen2009040_GL3153638_1 [gene] locus=scaffold764681_1:1:651:+[Lack 5'-end]",</p> <p>"rumen3042_GL2518797_1 [gene] locus=scaffold1571394_1:1:651:+[Lack 5'-end]"</p>                                                                                                                                                                                                                                                                                                                                                                                                                                                                                                                                                                                                                                                                                                                                                                                                                                                                                                                                                                                                                                                                                                                                                                                                                                                                                                                                                                                                                                                                                 |
| <p>["pigPIG-026_GL0013259 [gene] locus=scaffold81048_2:2:1159:+ [Lack 5'-end] codon-table.11",</p> <p>"rumen552_GL1221272_1 [gene] locus=scaffold619406_1:5513:6670:-[Complete]",</p>                                                                                                                                                                                                                                                                                                                                                                                                                                                                                                                                                                                                                                                                                                                                                                                                                                                                                                                                                                                                                                                                                                                                                                                                                                                                                                                                                                                                                                                                                                                                                                                                                                                         |

|                                                                                                                                                                                                                                                            |
|------------------------------------------------------------------------------------------------------------------------------------------------------------------------------------------------------------------------------------------------------------|
| "rumen2009040_GL2065926_1 [gene] locus=scaffold1065072_1:518:1675:-[Lack 5'-end]"                                                                                                                                                                          |
| ["pigPIG-026_GL0130063 [gene] locus=scaffold112759_1:1:564:+ [Lack 5'-end] codon-table.11"]                                                                                                                                                                |
| ["pigPIG-026_GL0193814 [gene] locus=scaffold114_12:4262:5008:+ [Lack 3'-end] codon-table.11"]                                                                                                                                                              |
| ["pigPIG-026_GL0248028 [gene] locus=scaffold60158_1:2357:3580:+ [Complete] codon-table.11"]                                                                                                                                                                |
| ["pigPIG-027_GL0041928 [gene] locus=scaffold80042_1:3:476:+ [Lack 5'-end] codon-table.11",<br>"rumen3042_GL2172007_1 [gene] locus=scaffold1967034_1:77:550:-[Lack 5'-end]"                                                                                 |
| ["pigPIG-029_GL0031350 [gene] locus=scaffold22653_6:3:530:+ [Lack both ends] codon-table.11"]                                                                                                                                                              |
| ["pigPIG-031_GL0065486 [gene] locus=scaffold100115_3:690:1664:+ [Lack 3'-end] codon-table.11"]                                                                                                                                                             |
| ["pigPIG-031_GL0184492 [gene] locus=scaffold4264_2:3:578:+ [Lack 5'-end] codon-table.11",<br>"pigPIG-034_GL0183281 [gene] locus=scaffold104881_1:3:575:+ [Lack both ends] codon-table.11"]                                                                 |
| ["pigPIG-033_GL0201605 [gene] locus=scaffold39444_1:3:818:+ [Lack both ends] codon-table.11"]                                                                                                                                                              |
| ["pigPIG-034_GL0075039 [gene] locus=scaffold145714_2:8552:9391:+ [Complete] codon-table.11"]                                                                                                                                                               |
| ["pigPIG-035_GL0076964 [gene] locus=scaffold4108_2:5911:6447:- [Lack 5'-end] codon-table.11"]                                                                                                                                                              |
| ["pigPIG-035_GL0142973 [gene] locus=scaffold113295_1:2:940:- [Lack 3'-end] codon-table.11",<br>"rumen555_GL2185050_1 [gene] locus=scaffold1241617_1:1:939:+[Lack both ends]"                                                                               |
| ["pigPIG-035_GL0143396 [gene] locus=C1702293_1:1:747:+ [Lack 5'-end] codon-table.11",<br>"rumen3042_GL1313175_1 [gene] locus=scaffold12436_3:1181:1927:-[Lack 5'-end]",<br>"rumen3042_GL2802106_1 [gene] locus=scaffold1587930_1:7803:8549:-[Lack 5'-end]" |
| ["pigPIG-036_GL0166384 [gene] locus=scaffold107511_2:196:633:- [Lack 5'-end] codon-table.11",<br>"rumen100058_GL0050368_1 [gene] locus=scaffold675000_3:2:439:+[Lack 5'-end]"                                                                              |
| ["pigPIG-037_GL0127005 [gene] locus=scaffold82022_5:177:971:+ [Lack 3'-end] codon-table.11"]                                                                                                                                                               |
| ["pigPIG-038_GL0128508 [gene] locus=scaffold208995_2:1244:2473:+ [Complete] codon-table.11",<br>"pigPIG-082_GL0061069 [gene] locus=scaffold48565_2:2246:3475:- [Complete] codon-table.11"]                                                                 |
| ["pigPIG-038_GL0157334 [gene] locus=scaffold205231_3:3:800:+ [Lack 5'-end] codon-table.11"]                                                                                                                                                                |
| ["pigPIG-038_GL0173146 [gene] locus=scaffold108992_2:23406:24671:+ [Complete] codon-table.11"]                                                                                                                                                             |
| ["pigPIG-044_GL0139262 [gene] locus=scaffold51992_17:2573:3235:- [Lack 5'-end] codon-table.11"]                                                                                                                                                            |
| ["pigPIG-044_GL0160786 [gene] locus=scaffold51992_18:2:469:- [Lack 3'-end] codon-table.11"]                                                                                                                                                                |
| ["pigPIG-045_GL0086006 [gene] locus=scaffold120143_1:1379:2458:+ [Lack 3'-end] codon-table.11"]                                                                                                                                                            |
| ["pigPIG-045_GL0165944 [gene] locus=scaffold45985_4:713:1708:- [Complete] codon-table.11"]                                                                                                                                                                 |
| ["pigPIG-046_GL0076681 [gene] locus=scaffold103983_1:1:456:+ [Lack 5'-end] codon-table.11"]                                                                                                                                                                |
| ["pigPIG-046_GL0190036 [gene] locus=scaffold132072_3:117:602:+ [Lack 3'-end] codon-table.11"]                                                                                                                                                              |
| ["pigPIG-058_GL0014194 [gene] locus=scaffold204438_2:2:589:+ [Lack both ends] codon-table.11",<br>"rumen554_GL1020366_1 [gene] locus=scaffold1719517_1:3:590:+[Lack both ends]"                                                                            |
| ["pigPIG-058_GL0242172 [gene] locus=scaffold213269_2:2:505:- [Lack both ends] codon-table.11"]                                                                                                                                                             |
| ["pigPIG-079_GL0015783 [gene] locus=scaffold78110_4:3:632:+ [Lack both ends] codon-table.11"]                                                                                                                                                              |
| ["pigPIG-081_GL0069460 [gene] locus=scaffold54785_1:15372:16550:- [Complete] codon-table.11"]                                                                                                                                                              |
| ["pigPIG-081_GL0070629 [gene] locus=scaffold49609_1:5474:6700:- [Complete] codon-table.11"]                                                                                                                                                                |
| ["pigPIG-082_GL0156754 [gene] locus=scaffold68717_3:3:707:+ [Lack both ends] codon-table.11",<br>"rumen555_GL0384859_1 [gene] locus=scaffold884172_1:2:706:-[Lack both ends]"                                                                              |
| ["pigPIG-083_GL0170487 [gene] locus=scaffold63230_21:2:1129:+ [Lack 5'-end] codon-table.11",<br>"rumen100058_GL0775549_1 [gene] locus=scaffold2096722_1:120:1244:+[Lack 3'-end]"                                                                           |
| ["pigPIG-084_GL0114584 [gene] locus=scaffold13539_18:1:933:- [Lack 3'-end] codon-table.11",<br>"rumen553_GL0859605_1 [gene] locus=scaffold100021_1:9385:10317:+[Lack 3'-end]"                                                                              |



|                                                                                                                                                                                                                                                                                                                                                                                                                                                    |
|----------------------------------------------------------------------------------------------------------------------------------------------------------------------------------------------------------------------------------------------------------------------------------------------------------------------------------------------------------------------------------------------------------------------------------------------------|
| ["pigPIG-085_GL0107466 [gene] locus=scaffold130200_1:3:563:+ [Lack both ends] codon-table.11"]                                                                                                                                                                                                                                                                                                                                                     |
| ["pigPIG-091_GL0053548 [gene] locus=scaffold161822_1:14463:15920:- [Complete] codon-table.11"]                                                                                                                                                                                                                                                                                                                                                     |
| ["pigPIG-093_GL0033145 [gene] locus=scaffold65710_1:10422:11711:- [Complete] codon-table.11"]                                                                                                                                                                                                                                                                                                                                                      |
| ["pigPIG-094_GL0136337 [gene] locus=scaffold151664_2:1456:2307:- [Lack 5'-end] codon-table.11"]                                                                                                                                                                                                                                                                                                                                                    |
| ["pigPIG-094_GL0195080 [gene] locus=scaffold4599_7:2:955:+ [Lack 5'-end] codon-table.11"]                                                                                                                                                                                                                                                                                                                                                          |
| ["pigPIG-095_GL0141942 [gene] locus=scaffold42740_4:3668:4963:+ [Complete] codon-table.11"]                                                                                                                                                                                                                                                                                                                                                        |
| ["pigPIG-097_GL0062624 [gene] locus=scaffold87566_1:3:794:+ [Lack both ends] codon-table.11",<br>"rumen100058_GL0632391_1 [gene] locus=scaffold1560285_3:3:797:+[Lack 5'-end]"]                                                                                                                                                                                                                                                                    |
| ["pigPIG-097_GL0075270 [gene] locus=scaffold85507_1:657:1229:+ [Lack 3'-end] codon-table.11"]                                                                                                                                                                                                                                                                                                                                                      |
| ["pigPIG-103_GL0008850 [gene] locus=scaffold175724_1:3:656:- [Lack 3'-end] codon-table.11",<br>"pigPIG-103_GL0269847 [gene] locus=scaffold175723_1:3:656:- [Lack 3'-end] codon-table.11",<br>"pigBMZ-1B_GL0037337 [gene] locus=scaffold76326_1:1:654:- [Lack both ends] codon-table.11",<br>"rumen0081_GL1284696_1 [gene] locus=scaffold1769067_1:1:654:-[Lack 3'-end]",<br>"rumen3042_GL2115542_1 [gene] locus=C52164284_1:3:656:-[Lack 3'-end]"] |
| ["pigPIG-106_GL0188443 [gene] locus=scaffold67583_1:1570:3729:+ [Lack 3'-end] codon-table.11"]                                                                                                                                                                                                                                                                                                                                                     |
| ["pigPIG-108_GL0134942 [gene] locus=scaffold41440_2:2:1132:- [Lack 3'-end] codon-table.11"]                                                                                                                                                                                                                                                                                                                                                        |
| ["pigPIG-109_GL0075251 [gene] locus=scaffold15250_2:21:500:- [Lack 5'-end] codon-table.11"]                                                                                                                                                                                                                                                                                                                                                        |
| ["pigPIG-110_GL0001971 [gene] locus=scaffold57452_8:23299:24480:- [Complete] codon-table.11"]                                                                                                                                                                                                                                                                                                                                                      |
| ["pigPIG-110_GL0147213 [gene] locus=scaffold22146_4:1:675:+ [Lack 5'-end] codon-table.11",<br>"rumen2009040_GL1194740_1 [gene] locus=scaffold2792895_5:199:873:-[Lack 5'-end]"]                                                                                                                                                                                                                                                                    |
| ["pigPIG_111_GL0048555 [gene] locus=scaffold145756_2:1:531:+ [Lack both ends] codon-table.11"]                                                                                                                                                                                                                                                                                                                                                     |
| ["pigPIG_114_GL0016970 [gene] locus=scaffold9464_4:2:553:- [Lack both ends] codon-table.11"]                                                                                                                                                                                                                                                                                                                                                       |
| ["pigPIG_120_GL0208425 [gene] locus=C2070008_1:12:884:- [Lack 5'-end] codon-table.11"]                                                                                                                                                                                                                                                                                                                                                             |
| ["pigPIG_123_GL0290744 [gene] locus=scaffold33_1:3:515:- [Complete] codon-table.11"]                                                                                                                                                                                                                                                                                                                                                               |
| ["pigPIG_124_GL0253480 [gene] locus=scaffold127978_1:2055:2555:+ [Complete] codon-table.11"]                                                                                                                                                                                                                                                                                                                                                       |
| ["pigPIG_125_GL0120815 [gene] locus=scaffold71681_1:842:2026:- [Complete] codon-table.11",<br>"rumen0081_GL0510562_1 [gene] locus=scaffold200904_3:2016:3200:+[Complete]",<br>"rumen7049_GL1461122_1 [gene] locus=scaffold903821_14:408:1592:-[Complete]"]                                                                                                                                                                                         |
| ["pigPIG_126_GL0031494 [gene] locus=scaffold78398_1:3291:3761:+ [Complete] codon-table.11"]                                                                                                                                                                                                                                                                                                                                                        |
| ["pigPIG_127_GL0155405 [gene] locus=C2337582_1:249:707:+ [Complete] codon-table.11"]                                                                                                                                                                                                                                                                                                                                                               |
| ["pigPIG_128_GL0080714 [gene] locus=scaffold15833_2:355:1005:+ [Lack 3'-end] codon-table.11"]                                                                                                                                                                                                                                                                                                                                                      |
| ["pigPIG_133_GL0082333 [gene] locus=scaffold114942_2:1:615:- [Lack 3'-end] codon-table.11"]                                                                                                                                                                                                                                                                                                                                                        |
| ["pigPIG_135_GL0053887 [gene] locus=scaffold48752_2:2:811:+ [Lack 5'-end] codon-table.11",<br>"rumen2009040_GL0202502_1 [gene] locus=scaffold1050783_1:1:810:+[Lack 5'-end]"]                                                                                                                                                                                                                                                                      |
| ["pigPIG_138_GL0203883 [gene] locus=scaffold59906_3:124:669:+ [Lack 3'-end] codon-table.11"]                                                                                                                                                                                                                                                                                                                                                       |
| ["pigPIG_151_GL0084007 [gene] locus=scaffold188087_9:2:796:- [Lack both ends] codon-table.11"]                                                                                                                                                                                                                                                                                                                                                     |
| ["pigPIG_151_GL0327709 [gene] locus=scaffold254836_6:2:1033:- [Lack 3'-end] codon-table.11"]                                                                                                                                                                                                                                                                                                                                                       |
| ["pigPIG_155_GL0140171 [gene] locus=scaffold71559_1:1:582:+ [Lack both ends] codon-table.11"]                                                                                                                                                                                                                                                                                                                                                      |
| ["pigPIG_156_GL0222712 [gene] locus=scaffold125662_2:2487:3239:- [Complete] codon-table.11"]                                                                                                                                                                                                                                                                                                                                                       |
| ["pigPIG_157_GL0113023 [gene] locus=scaffold92247_5:2:916:- [Lack 3'-end] codon-table.11"]                                                                                                                                                                                                                                                                                                                                                         |
| ["pigPIG_162_GL0239358 [gene] locus=C3366578_1:568:1551:- [Lack 5'-end] codon-table.11",<br>"rumen3042_GL2148850_1 [gene] locus=scaffold1281627_1:1628:2611:-[Complete]"]                                                                                                                                                                                                                                                                          |
| ["pigPIG_173_GL0175765 [gene] locus=scaffold230225_4:1537:2787:- [Complete] codon-table.11",                                                                                                                                                                                                                                                                                                                                                       |

|                                                                                                                                                                                          |
|------------------------------------------------------------------------------------------------------------------------------------------------------------------------------------------|
| "pigPIG-019_GL0155432 [gene] locus=scaffold48980_3:1255:2505:- [Complete] codon-table.11"                                                                                                |
| "pigPIG_173_GL0198560 [gene] locus=scaffold181858_4:3:932:+ [Lack 5'-end] codon-table.11",<br>"rumen7049_GL2020500_1 [gene] locus=scaffold2252006_1:3:932:+[Lack 5'-end]"                |
| "pigPIG_175_GL0060567 [gene] locus=scaffold108852_1_1:1563:2015:- [Lack 5'-end] codon-table.11"                                                                                          |
| "pigPIG_176_GL0069010 [gene] locus=scaffold204640_1:2:655:+ [Lack both ends] codon-table.11"                                                                                             |
| "pigPIG_186_GL0168224 [gene] locus=scaffold18482_2:2:565:+ [Lack both ends] codon-table.11"                                                                                              |
| "pigPIG_187_GL0057039 [gene] locus=C2545629_1:3:410:- [Lack 3'-end] codon-table.11"                                                                                                      |
| "pigPIG_190_GL0017562 [gene] locus=scaffold141127_3:2:505:+ [Lack 5'-end] codon-table.11",<br>"rumen100058_GL0269459_1 [gene] locus=scaffold56688_1:3:506:+[Lack 5'-end]"                |
| "pigPIG_196_GL0038436 [gene] locus=scaffold233365_1:3:515:- [Lack both ends] codon-table.11"                                                                                             |
| "pigPIG_197_GL0000064 [gene] locus=C3418714_1:3310:4551:- [Complete] codon-table.11",<br>"rumen100058_GL2992077_1 [gene] locus=scaffold434594_7:2498:3739:+[Complete]"                   |
| "pigPIG_198_GL0088713 [gene] locus=scaffold254369_1:3:563:+ [Lack both ends] codon-table.11"                                                                                             |
| "pigPIG_198_GL0261592 [gene] locus=scaffold559_5:2415:3431:+ [Complete] codon-table.11"                                                                                                  |
| "pigPIG_201_GL0250193 [gene] locus=scaffold68270_4:2:739:+ [Lack both ends] codon-table.11"                                                                                              |
| "pigPIG_204_GL0024241 [gene] locus=scaffold104647_11:961:1479:+ [Lack 3'-end] codon-table.11"                                                                                            |
| "pigPIG_205_GL0135979 [gene] locus=scaffold176768_5:3:467:+ [Lack 5'-end] codon-table.11",<br>"pigPIG-001_GL0200696 [gene] locus=scaffold24103_2:102:566:- [Lack 5'-end] codon-table.11" |
| "pigPIG_207_GL0143531 [gene] locus=scaffold8278_9:22:798:+ [Lack 3'-end] codon-table.11"                                                                                                 |
| "pigPIG_208_GL0114492 [gene] locus=scaffold224521_2:2:784:+ [Lack both ends] codon-table.11"                                                                                             |
| "pigSYZ-428B_GL0135299 [gene] locus=scaffold104686_1:2:640:- [Lack both ends] codon-table.11"                                                                                            |
| "pigSYZ-428B_GL0190954 [gene] locus=scaffold77153_1:1:774:- [Lack both ends] codon-table.11"                                                                                             |
| "pigZXZ-7B_GL0151617 [gene] locus=scaffold119190_2:23:511:- [Lack 5'-end] codon-table.11"                                                                                                |
| "rumen0081_GL0065389_1 [gene] locus=scaffold555547_1:1:516:+[Lack both ends]",<br>"rumen2009040_GL0561469_1 [gene] locus=scaffold1535209_1:2:517:-[Lack both ends]"                      |
| "rumen0081_GL0127716_1 [gene] locus=scaffold1034514_2:2:844:+[Lack 5'-end]"                                                                                                              |
| "rumen0081_GL0338636_1 [gene] locus=scaffold412998_5:1269:1973:+[Lack 3'-end]"                                                                                                           |
| "rumen0081_GL0411089_1 [gene] locus=scaffold1487438_1:3:599:-[Lack both ends]"                                                                                                           |
| "rumen0081_GL0460747_1 [gene] locus=scaffold112280_2:2:1036:+[Lack 5'-end]"                                                                                                              |
| "rumen0081_GL0488420_1 [gene] locus=C38714956_1:3:599:-[Lack 3'-end]",<br>"rumen100058_GL1539564_1 [gene] locus=scaffold493414_3:3:599:-[Lack 3'-end]"                                   |
| "rumen0081_GL0553385_1 [gene] locus=scaffold804545_7:390:1268:+[Lack 3'-end]"                                                                                                            |
| "rumen0081_GL0612888_1 [gene] locus=scaffold1949880_1:52:705:+[Lack 3'-end]"                                                                                                             |
| "rumen0081_GL0618138_1 [gene] locus=scaffold485236_1:2:640:+[Lack both ends]"                                                                                                            |
| "rumen0081_GL0642831_1 [gene] locus=scaffold1832181_1:25:840:-[Lack 5'-end]",<br>"rumen100058_GL3367416_1 [gene] locus=scaffold1731703_2:2:817:+[Lack 5'-end]"                           |
| "rumen0081_GL0654196_1 [gene] locus=scaffold23987_2:1014:1817:-[Lack 5'-end]"                                                                                                            |
| "rumen0081_GL0717890_1 [gene] locus=scaffold1925290_2:2:910:+[Lack both ends]"                                                                                                           |
| "rumen0081_GL0766424_1 [gene] locus=scaffold659499_2:303:854:+[Lack 3'-end]",<br>"rumen100058_GL1730935_1 [gene] locus=scaffold2642523_2:129:680:+[Lack 3'-end]"                         |
| "rumen0081_GL0822409_1 [gene] locus=scaffold860226_2:182:1081:+[Lack 3'-end]",<br>"rumen7049_GL2418659_1 [gene] locus=scaffold1619286_1:3:902:-[Lack 3'-end]"                            |
| "rumen0081_GL0914263_1 [gene] locus=scaffold1651922_1:656:1327:-[Lack 5'-end]"                                                                                                           |

|                                                                                                                                                                                                                                                |
|------------------------------------------------------------------------------------------------------------------------------------------------------------------------------------------------------------------------------------------------|
| "rumen100058_GL3795401_1 [gene] locus=scaffold80547_5:1:669:-[Lack both ends]"                                                                                                                                                                 |
| "rumen0081_GL0932054_1 [gene] locus=scaffold1308780_1:1:567:+[Lack 5'-end]",<br>"rumen7049_GL2755930_1 [gene] locus=scaffold113374_1:1:567:+[Lack 5'-end]"                                                                                     |
| "rumen0081_GL0935094_1 [gene] locus=scaffold1960186_3:3:683:+[Lack 5'-end]",<br>"rumen100058_GL3376008_1 [gene] locus=scaffold3274052_1:2:682:+[Lack 5'-end]"                                                                                  |
| "rumen0081_GL0959534_1 [gene] locus=scaffold675900_2:224:1381:+[Complete]"                                                                                                                                                                     |
| "rumen0081_GL1081048_1 [gene] locus=scaffold1792095_1:3:692:+[Lack 5'-end]"                                                                                                                                                                    |
| "rumen0081_GL1287041_1 [gene] locus=scaffold821699_4:571:1071:-[Lack 5'-end]",<br>"rumen2009040_GL1630589_1 [gene] locus=scaffold2545047_1:1:501:+[Lack 5'-end]"                                                                               |
| "rumen0081_GL1294364_1 [gene] locus=scaffold1486322_1:290:886:+[Lack 3'-end]"                                                                                                                                                                  |
| "rumen0081_GL1333276_1 [gene] locus=scaffold543317_1:928:1971:+[Lack 3'-end]"                                                                                                                                                                  |
| "rumen0081_GL1465181_1 [gene] locus=scaffold1486322_2:2:454:+[Lack 5'-end]"                                                                                                                                                                    |
| "rumen0081_GL1475424_1 [gene] locus=scaffold1740690_1:659:1420:+[Lack 3'-end]"                                                                                                                                                                 |
| "rumen0081_GL1600238_1 [gene] locus=scaffold491436_1:332:1285:-[Lack 5'-end]"                                                                                                                                                                  |
| "rumen0081_GL1693393_1 [gene] locus=scaffold1779572_1:445:906:+[Lack 3'-end]"                                                                                                                                                                  |
| "rumen0081_GL1742662_1 [gene] locus=scaffold72493_8:1:438:-[Lack 3'-end]"                                                                                                                                                                      |
| "rumen0081_GL1809516_1 [gene] locus=scaffold1960186_2:141:590:+[Lack 3'-end]"                                                                                                                                                                  |
| "rumen0081_GL1935353_1 [gene] locus=scaffold1125193_1:2:697:-[Lack both ends]"                                                                                                                                                                 |
| "rumen0081_GL1978628_1 [gene] locus=scaffold1601377_1:3:566:-[Lack both ends]"                                                                                                                                                                 |
| "rumen0081_GL2055008_1 [gene] locus=C39340957_1:3:731:-[Lack 3'-end]"                                                                                                                                                                          |
| "rumen0081_GL2122343_1 [gene] locus=scaffold1075911_5:3:800:-[Lack 3'-end]"                                                                                                                                                                    |
| "rumen0081_GL2136272_1 [gene] locus=scaffold739655_1:3:635:-[Lack both ends]"                                                                                                                                                                  |
| "rumen0081_GL2300849_1 [gene] locus=scaffold1124614_2:120:620:+[Lack 3'-end]"                                                                                                                                                                  |
| "rumen0081_GL2407674_1 [gene] locus=scaffold980628_1:3356:4189:-[Lack 5'-end]"                                                                                                                                                                 |
| "rumen0081_GL2446631_1 [gene] locus=scaffold929589_1:3:560:+[Lack both ends]"                                                                                                                                                                  |
| "rumen0081_GL2453009_1 [gene] locus=scaffold717067_1:3:569:-[Lack 3'-end]"                                                                                                                                                                     |
| "rumen0081_GL2484873_1 [gene] locus=C39086163_1:307:846:+[Lack 3'-end]",<br>"rumen100058_GL2238021_1 [gene] locus=scaffold2718570_2:3:542:-[Lack both ends]",<br>"rumen100058_GL2526240_1 [gene] locus=scaffold1296534_9:1:540:-[Lack 3'-end]" |
| "rumen100058_GL0004149_1 [gene] locus=scaffold1160113_1:3:728:+[Lack both ends]"                                                                                                                                                               |
| "rumen100058_GL0027684_1 [gene] locus=scaffold2981749_3:1:705:-[Lack 3'-end]"                                                                                                                                                                  |
| "rumen100058_GL0079033_1 [gene] locus=scaffold1645549_2:1:618:-[Lack both ends]"                                                                                                                                                               |
| "rumen100058_GL0198858_1 [gene] locus=scaffold1730225_3:2:931:+[Lack both ends]"                                                                                                                                                               |
| "rumen100058_GL0266682_1 [gene] locus=scaffold1013398_2:2984:3499:-[Lack 5'-end]"                                                                                                                                                              |
| "rumen100058_GL0277713_1 [gene] locus=scaffold348243_2:34:1170:-[Lack 5'-end]"                                                                                                                                                                 |
| "rumen100058_GL0284935_1 [gene] locus=scaffold620998_1:1:774:+[Lack 5'-end]"                                                                                                                                                                   |
| "rumen100058_GL0316493_1 [gene] locus=scaffold3132681_1:44:586:+[Lack 3'-end]"                                                                                                                                                                 |
| "rumen100058_GL0321424_1 [gene] locus=scaffold2801014_1:1:495:+[Lack 5'-end]"                                                                                                                                                                  |
| "rumen100058_GL0393593_1 [gene] locus=scaffold1896703_3:1:435:-[Lack 3'-end]"                                                                                                                                                                  |
| "rumen100058_GL0395059_1 [gene] locus=scaffold71213_2:758:1360:+[Lack 3'-end]"                                                                                                                                                                 |
| "rumen100058_GL0421491_1 [gene] locus=scaffold3263654_1:2:535:+[Lack both ends]"                                                                                                                                                               |
| "rumen100058_GL0434644_1 [gene] locus=scaffold2706756_1:3:590:-[Lack 3'-end]"                                                                                                                                                                  |
| "rumen100058_GL0462394_1 [gene] locus=scaffold150431_3:431:1024:-[Lack 5'-end]"                                                                                                                                                                |

|                                                                                                                                                                       |
|-----------------------------------------------------------------------------------------------------------------------------------------------------------------------|
| "rumen100058_GL0575058_1 [gene] locus=scaffold3082305_1:222:1433:+[Lack 3'-end]",<br>"rumen2009040_GL1003917_1 [gene] locus=scaffold31292_2:1817:3031:+[Complete]"    |
| "rumen100058_GL0578732_1 [gene] locus=C59582458_1:3:833:-[Lack both ends]"                                                                                            |
| "rumen100058_GL0671260_1 [gene] locus=scaffold2654340_1:99:602:+[Lack 3'-end]"                                                                                        |
| "rumen100058_GL0684755_1 [gene] locus=scaffold2188772_3:1:546:-[Lack 3'-end]",<br>"rumen2009040_GL3028990_1 [gene] locus=scaffold473151_1:3:548:-[Lack 3'-end]"       |
| "rumen100058_GL0697017_1 [gene] locus=scaffold1340323_1:147:1112:-[Lack 5'-end]"                                                                                      |
| "rumen100058_GL0791227_1 [gene] locus=scaffold447185_1:1:528:+[Lack both ends]"                                                                                       |
| "rumen100058_GL0900473_1 [gene] locus=scaffold2613189_2:1145:2335:+[Complete]"                                                                                        |
| "rumen100058_GL0934105_1 [gene] locus=C59009796_1:3:686:-[Lack both ends]",<br>"rumen3042_GL0279852_1 [gene] locus=scaffold377932_1:3:686:-[Lack 3'-end]"             |
| "rumen100058_GL0944679_1 [gene] locus=scaffold1815004_1:1:585:+[Lack 5'-end]"                                                                                         |
| "rumen100058_GL0986726_1 [gene] locus=scaffold1543466_1:3:770:-[Lack both ends]"                                                                                      |
| "rumen100058_GL1004470_1 [gene] locus=scaffold471899_1:3:554:+[Lack both ends]"                                                                                       |
| "rumen100058_GL1027453_1 [gene] locus=scaffold2325489_1:1:621:+[Lack 5'-end]"                                                                                         |
| "rumen100058_GL1057231_1 [gene] locus=scaffold1947780_3:1:594:-[Lack both ends]"                                                                                      |
| "rumen100058_GL1077138_1 [gene] locus=scaffold11652_2:1:738:-[Lack both ends]"                                                                                        |
| "rumen100058_GL1131842_1 [gene] locus=scaffold1602790_2:1:669:+[Lack both ends]",<br>"rumen100058_GL3833831_1 [gene] locus=scaffold2507506_1:816:1484:+[Lack 3'-end]" |
| "rumen100058_GL1163277_1 [gene] locus=scaffold2470163_1:1:501:+[Lack both ends]"                                                                                      |
| "rumen100058_GL1306731_1 [gene] locus=scaffold1053781_1:1:1086:+[Lack 5'-end]"                                                                                        |
| "rumen100058_GL1334981_1 [gene] locus=C59411520_1:373:780:+[Lack 3'-end]"                                                                                             |
| "rumen100058_GL1341542_1 [gene] locus=scaffold965193_2:1:972:-[Lack 3'-end]"                                                                                          |
| "rumen100058_GL1371219_1 [gene] locus=scaffold2723488_1:1:504:+[Lack both ends]"                                                                                      |
| "rumen100058_GL1477150_1 [gene] locus=scaffold2280115_4:3:1055:-[Lack 3'-end]",<br>"rumen100058_GL2631011_1 [gene] locus=scaffold2686552_1:225:1277:+[Lack 3'-end]"   |
| "rumen100058_GL1525332_1 [gene] locus=scaffold191575_5:848:2032:-[Complete]"                                                                                          |
| "rumen100058_GL1527366_1 [gene] locus=scaffold3269640_1:202:729:+[Lack 3'-end]"                                                                                       |
| "rumen100058_GL1610277_1 [gene] locus=C58477178_1:1:600:+[Lack both ends]"                                                                                            |
| "rumen100058_GL1672120_1 [gene] locus=scaffold51761_1:1999:2880:+[Lack 3'-end]",<br>"rumen3042_GL1999019_1 [gene] locus=scaffold1526490_3:1:882:-[Lack both ends]"    |
| "rumen100058_GL1733252_1 [gene] locus=scaffold1969723_1:1:432:+[Lack 5'-end]",<br>"rumen2009040_GL0377437_1 [gene] locus=scaffold643565_2:123:554:-[Lack 5'-end]"     |
| "rumen100058_GL1742050_1 [gene] locus=scaffold2118762_1:3:614:-[Lack both ends]"                                                                                      |
| "rumen100058_GL1832360_1 [gene] locus=scaffold4654_1:1:960:-[Lack both ends]"                                                                                         |
| "rumen100058_GL1863710_1 [gene] locus=scaffold735331_2:2:847:+[Lack 5'-end]"                                                                                          |
| "rumen100058_GL1942038_1 [gene] locus=scaffold1704790_1:1:807:+[Lack 5'-end]"                                                                                         |
| "rumen100058_GL1966424_1 [gene] locus=scaffold1699302_1:231:1298:-[Lack 5'-end]"                                                                                      |
| "rumen100058_GL2002393_1 [gene] locus=scaffold2632189_2:2:640:-[Lack both ends]"                                                                                      |
| "rumen100058_GL2044991_1 [gene] locus=C59153038_1:1:717:-[Lack both ends]"                                                                                            |
| "rumen100058_GL2093037_1 [gene] locus=scaffold1802786_4:1:750:-[Lack both ends]"                                                                                      |
| "rumen100058_GL2119256_1 [gene] locus=scaffold491945_1:57:554:+[Lack 3'-end]"                                                                                         |
| "rumen100058_GL2124701_1 [gene] locus=scaffold903292_1:1:1467:+[Lack both ends]"                                                                                      |

|                                                                                                                                                                                                                                                                                                                                            |
|--------------------------------------------------------------------------------------------------------------------------------------------------------------------------------------------------------------------------------------------------------------------------------------------------------------------------------------------|
| ["rumen100058_GL2154870_1 [gene] locus=scaffold2411437_1:2:577:-[Lack both ends]",<br>"rumen3042_GL2123395_1 [gene] locus=scaffold2337499_2:740:1315:+[Lack 3'-end]"]                                                                                                                                                                      |
| ["rumen100058_GL2161628_1 [gene] locus=scaffold1091202_10:2443:3210:-[Lack 5'-end]",<br>"rumen7049_GL1201810_1 [gene] locus=scaffold1800922_1:1:765:+[Lack both ends]"]                                                                                                                                                                    |
| ["rumen100058_GL2223364_1 [gene] locus=scaffold797009_2:82:1173:-[Lack 5'-end]"]                                                                                                                                                                                                                                                           |
| ["rumen100058_GL2284088_1 [gene] locus=scaffold1927667_1:280:1044:-[Lack 5'-end]"]                                                                                                                                                                                                                                                         |
| ["rumen100058_GL2284288_1 [gene] locus=C59357534_1:1:765:+[Lack both ends]",<br>"rumen7049_GL1233574_1 [gene] locus=scaffold702118_1:3:767:-[Lack both ends]"]                                                                                                                                                                             |
| ["rumen100058_GL2306076_1 [gene] locus=scaffold3338912_1:2:985:-[Lack both ends]"]                                                                                                                                                                                                                                                         |
| ["rumen100058_GL2313150_1 [gene] locus=scaffold428931_3:1:498:-[Lack both ends]"]                                                                                                                                                                                                                                                          |
| ["rumen100058_GL2365617_1 [gene] locus=scaffold462401_1:3:731:-[Lack both ends]"]                                                                                                                                                                                                                                                          |
| ["rumen100058_GL2418955_1 [gene] locus=scaffold639873_4:1:507:+[Lack both ends]"]                                                                                                                                                                                                                                                          |
| ["rumen100058_GL2423702_1 [gene] locus=scaffold2748936_1:1:1071:+[Lack 5'-end]"]                                                                                                                                                                                                                                                           |
| ["rumen100058_GL2519575_1 [gene] locus=scaffold2762265_3:2:634:+[Lack 5'-end]"]                                                                                                                                                                                                                                                            |
| ["rumen100058_GL2676087_1 [gene] locus=scaffold661069_1:3:761:+[Lack both ends]"]                                                                                                                                                                                                                                                          |
| ["rumen100058_GL2686420_1 [gene] locus=scaffold837914_2:1593:2132:-[Lack 5'-end]",<br>"rumen100058_GL2781152_1 [gene] locus=scaffold1985187_1:2:541:+[Lack 5'-end]",<br>"rumen100058_GL3309756_1 [gene] locus=scaffold363913_2_1:2:541:+[Lack 5'-end]",<br>"rumen2009040_GL3107657_1 [gene] locus=scaffold1949313_1:1:540:+[Lack 5'-end]"] |
| ["rumen100058_GL2822485_1 [gene] locus=scaffold1219105_2:3055:3753:+[Lack 3'-end]"]                                                                                                                                                                                                                                                        |
| ["rumen100058_GL2901305_1 [gene] locus=scaffold57323_3:3:527:+[Lack both ends]"]                                                                                                                                                                                                                                                           |
| ["rumen100058_GL2999709_1 [gene] locus=scaffold2889118_1:2:544:+[Lack both ends]"]                                                                                                                                                                                                                                                         |
| ["rumen100058_GL3013027_1 [gene] locus=scaffold2805555_1:1:573:-[Lack both ends]",<br>"rumen3042_GL2705622_1 [gene] locus=scaffold1332620_1:2:574:-[Lack both ends]"]                                                                                                                                                                      |
| ["rumen100058_GL3051751_1 [gene] locus=scaffold1406293_7:566:1837:-[Complete]"]                                                                                                                                                                                                                                                            |
| ["rumen100058_GL3144445_1 [gene] locus=scaffold1670612_1:2:535:-[Lack both ends]"]                                                                                                                                                                                                                                                         |
| ["rumen100058_GL3221420_1 [gene] locus=scaffold2843119_1:2:409:-[Lack 3'-end]"]                                                                                                                                                                                                                                                            |
| ["rumen100058_GL3356970_1 [gene] locus=scaffold189592_1:2:862:-[Lack both ends]"]                                                                                                                                                                                                                                                          |
| ["rumen100058_GL3520852_1 [gene] locus=scaffold3335149_1:3:734:+[Lack 5'-end]"]                                                                                                                                                                                                                                                            |
| ["rumen100058_GL3529071_1 [gene] locus=scaffold504382_1:1:1005:+[Lack 5'-end]"]                                                                                                                                                                                                                                                            |
| ["rumen100058_GL3536391_1 [gene] locus=scaffold1916298_8:396:827:+[Lack 3'-end]"]                                                                                                                                                                                                                                                          |
| ["rumen100058_GL3596268_1 [gene] locus=scaffold998408_2:1500:1928:+[Lack 3'-end]"]                                                                                                                                                                                                                                                         |
| ["rumen100058_GL3684077_1 [gene] locus=scaffold1020301_2:2:463:+[Lack 5'-end]"]                                                                                                                                                                                                                                                            |
| ["rumen100058_GL3761704_1 [gene] locus=scaffold3344023_1:1:618:+[Lack 5'-end]"]                                                                                                                                                                                                                                                            |
| ["rumen100058_GL3859024_1 [gene] locus=scaffold485768_2:1:555:+[Lack both ends]"]                                                                                                                                                                                                                                                          |
| ["rumen2009040_GL0019714_1 [gene] locus=scaffold2196920_1:1:651:+[Lack 5'-end]"]                                                                                                                                                                                                                                                           |
| ["rumen2009040_GL0033547_1 [gene] locus=scaffold2996455_1:3:704:-[Lack 3'-end]"]                                                                                                                                                                                                                                                           |
| ["rumen2009040_GL0148138_1 [gene] locus=scaffold728582_1:56:766:-[Lack 5'-end]"]                                                                                                                                                                                                                                                           |
| ["rumen2009040_GL0160630_1 [gene] locus=scaffold1253254_3:3:494:+[Lack 5'-end]"]                                                                                                                                                                                                                                                           |
| ["rumen2009040_GL0218699_1 [gene] locus=scaffold1339460_1:3:440:-[Lack 3'-end]"]                                                                                                                                                                                                                                                           |
| ["rumen2009040_GL0224302_1 [gene] locus=scaffold2988751_1:2:811:-[Lack 3'-end]",<br>"rumen7049_GL1713502_1 [gene] locus=scaffold1801653_3:2:811:+[Lack both ends]"]                                                                                                                                                                        |
| ["rumen2009040_GL0270988_1 [gene] locus=scaffold1454338_3:2:559:+[Lack both ends]"]                                                                                                                                                                                                                                                        |

|                                                                                                                                                                                        |
|----------------------------------------------------------------------------------------------------------------------------------------------------------------------------------------|
| ["rumen2009040_GL0357720_1 [gene] locus=scaffold1779755_3:1:588:+[Lack both ends]"]                                                                                                    |
| ["rumen2009040_GL0474796_1 [gene] locus=scaffold2421990_1:2:1006:+[Lack both ends]"]                                                                                                   |
| ["rumen2009040_GL0480478_1 [gene] locus=scaffold897786_1:2:763:-[Lack 3'-end]"]                                                                                                        |
| ["rumen2009040_GL0488748_1 [gene] locus=scaffold409690_2:303:998:+[Lack 3'-end]",<br>"rumen3042_GL1408264_1 [gene] locus=scaffold1569385_3:30:725:+[Lack 3'-end]"]                     |
| ["rumen2009040_GL0498920_1 [gene] locus=scaffold416704_2:2:661:+[Lack 5'-end]"]                                                                                                        |
| ["rumen2009040_GL0551496_1 [gene] locus=scaffold1667458_2:147:572:-[Lack 5'-end]",<br>"rumen2009040_GL1985329_1 [gene] locus=scaffold624415_1:341:766:-[Lack 5'-end]"]                 |
| ["rumen2009040_GL0607240_1 [gene] locus=scaffold2281443_8:2:799:+[Lack 5'-end]"]                                                                                                       |
| ["rumen2009040_GL0633993_1 [gene] locus=scaffold75155_3:1447:2619:+[Complete]",<br>"cazygl 332181646 gb AEE17334.1  glycosidase related protein [Treponema brennaborensis DSM 12168]"] |
| ["rumen2009040_GL0673296_1 [gene] locus=scaffold2641184_4:2:901:+[Lack 5'-end]"]                                                                                                       |
| ["rumen2009040_GL0678530_1 [gene] locus=scaffold2678330_1:3:1004:+[Lack 5'-end]"]                                                                                                      |
| ["rumen2009040_GL0693900_1 [gene] locus=scaffold95706_2:2:502:+[Lack both ends]",<br>"rumen2009040_GL1576731_1 [gene] locus=scaffold2943023_1:2:502:-[Lack both ends]"]                |
| ["rumen2009040_GL0697332_1 [gene] locus=C55196181_1:740:1150:-[Lack 5'-end]"]                                                                                                          |
| ["rumen2009040_GL0791868_1 [gene] locus=scaffold1078780_2:1:1059:+[Lack 5'-end]"]                                                                                                      |
| ["rumen2009040_GL0818151_1 [gene] locus=scaffold2914414_1:2:544:+[Lack 5'-end]"]                                                                                                       |
| ["rumen2009040_GL0859896_1 [gene] locus=scaffold1256819_3:1157:2290:-[Lack 5'-end]"]                                                                                                   |
| ["rumen2009040_GL0895446_1 [gene] locus=scaffold582346_1:3:734:+[Lack 5'-end]"]                                                                                                        |
| ["rumen2009040_GL0895532_1 [gene] locus=scaffold693684_1:3:1010:+[Lack 5'-end]"]                                                                                                       |
| ["rumen2009040_GL0897993_1 [gene] locus=scaffold1783831_1:1:939:+[Lack both ends]"]                                                                                                    |
| ["rumen2009040_GL0974319_1 [gene] locus=scaffold2038548_1:1:990:+[Lack 5'-end]"]                                                                                                       |
| ["rumen2009040_GL0996574_1 [gene] locus=scaffold12975_1:839:1795:+[Lack 3'-end]"]                                                                                                      |
| ["rumen2009040_GL1049229_1 [gene] locus=scaffold2453597_1:1:825:+[Lack 5'-end]"]                                                                                                       |
| ["rumen2009040_GL1088314_1 [gene] locus=scaffold3070946_1:1:573:+[Lack 5'-end]",<br>"rumen3042_GL1979964_1 [gene] locus=scaffold1170010_2:74:646:-[Lack 5'-end]"]                      |
| ["rumen2009040_GL1094453_1 [gene] locus=scaffold2150285_1:1:678:+[Lack 5'-end]"]                                                                                                       |
| ["rumen2009040_GL1163272_1 [gene] locus=scaffold705478_1:1:831:+[Lack 5'-end]"]                                                                                                        |
| ["rumen2009040_GL1215461_1 [gene] locus=scaffold1334207_1:845:1318:+[Lack 3'-end]"]                                                                                                    |
| ["rumen2009040_GL1227174_1 [gene] locus=scaffold2582807_1:1:501:-[Lack both ends]"]                                                                                                    |
| ["rumen2009040_GL1297949_1 [gene] locus=scaffold2677149_1:457:882:+[Lack 3'-end]"]                                                                                                     |
| ["rumen2009040_GL1305280_1 [gene] locus=scaffold3002734_1:54934:56220:+[Complete]"]                                                                                                    |
| ["rumen2009040_GL1309675_1 [gene] locus=C54365707_1:192:755:+[Lack 3'-end]",<br>"rumen2009040_GL2211219_1 [gene] locus=scaffold437521_1:1:564:-[Lack 3'-end]"]                         |
| ["rumen2009040_GL1331816_1 [gene] locus=scaffold2978926_1:3:632:-[Lack 3'-end]"]                                                                                                       |
| ["rumen2009040_GL1417614_1 [gene] locus=scaffold992072_4:1:507:+[Lack both ends]"]                                                                                                     |
| ["rumen2009040_GL1438960_1 [gene] locus=scaffold1407695_3:3:530:+[Lack both ends]"]                                                                                                    |
| ["rumen2009040_GL1641622_1 [gene] locus=scaffold3013358_1:3:434:-[Lack 3'-end]"]                                                                                                       |
| ["rumen2009040_GL1656174_1 [gene] locus=scaffold1358075_2:1:792:-[Lack 3'-end]",<br>"rumen3042_GL0867391_1 [gene] locus=scaffold1508821_2:1:792:-[Lack 3'-end]"]                       |
| ["rumen2009040_GL1663378_1 [gene] locus=scaffold389369_2:10005:10607:-[Lack 5'-end]",<br>"rumen7049_GL0447593_1 [gene] locus=scaffold1934473_3:1:603:+[Lack 5'-end]"]                  |

|                                                                                                                                                                                                                                                           |
|-----------------------------------------------------------------------------------------------------------------------------------------------------------------------------------------------------------------------------------------------------------|
| ["rumen2009040_GL1688301_1 [gene] locus=scaffold5458_4:2:991:+[Lack 5'-end]"]                                                                                                                                                                             |
| ["rumen2009040_GL1717716_1 [gene] locus=scaffold3054854_1:3:842:-[Lack both ends]"]                                                                                                                                                                       |
| ["rumen2009040_GL1749906_1 [gene] locus=scaffold2046819_1:2:643:+[Lack both ends]"]                                                                                                                                                                       |
| ["rumen2009040_GL1761748_1 [gene] locus=scaffold2804267_1:88:549:-[Lack 5'-end]"]                                                                                                                                                                         |
| ["rumen2009040_GL1807313_1 [gene] locus=C53084701_1:1:468:-[Lack 3'-end]"]                                                                                                                                                                                |
| ["rumen2009040_GL1842570_1 [gene] locus=scaffold783087_2:83:526:+[Lack 3'-end]"]                                                                                                                                                                          |
| ["rumen2009040_GL1938062_1 [gene] locus=scaffold2528382_1:262:1254:+[Lack 3'-end]",<br>"rumen2009040_GL2485922_1 [gene] locus=scaffold48956_3:539:1531:+[Lack 3'-end]",<br>"rumen2009040_GL2916504_1 [gene] locus=scaffold417233_1:3:995:-[Lack 3'-end]"] |
| ["rumen2009040_GL2025858_1 [gene] locus=scaffold2345354_1:1:567:+[Lack both ends]"]                                                                                                                                                                       |
| ["rumen2009040_GL2050729_1 [gene] locus=scaffold396189_10:6479:8968:+[Complete]"]                                                                                                                                                                         |
| ["rumen2009040_GL2064896_1 [gene] locus=scaffold1767939_1:1:585:+[Lack both ends]"]                                                                                                                                                                       |
| ["rumen2009040_GL2070374_1 [gene] locus=scaffold921679_10:2:1225:+[Lack both ends]"]                                                                                                                                                                      |
| ["rumen2009040_GL2172593_1 [gene] locus=scaffold820164_8:431:952:+[Lack 3'-end]",<br>"rumen3042_GL0215080_1 [gene] locus=C50220895_1:3:524:+[Lack both ends]"]                                                                                            |
| ["rumen2009040_GL2243740_1 [gene] locus=scaffold3000142_1:447:1289:-[Lack 5'-end]",<br>"rumen7049_GL1920804_1 [gene] locus=scaffold15914_1:1:843:+[Lack 5'-end]"]                                                                                         |
| ["rumen2009040_GL2249617_1 [gene] locus=scaffold1670928_1:2:1240:+[Lack 5'-end]"]                                                                                                                                                                         |
| ["rumen2009040_GL2271978_1 [gene] locus=scaffold773586_1:3:587:-[Lack both ends]"]                                                                                                                                                                        |
| ["rumen2009040_GL2331927_1 [gene] locus=scaffold2424432_5:3:1103:+[Lack 5'-end]"]                                                                                                                                                                         |
| ["rumen2009040_GL2393911_1 [gene] locus=scaffold2981852_1:1:663:+[Lack both ends]"]                                                                                                                                                                       |
| ["rumen2009040_GL2418094_1 [gene] locus=scaffold1388705_2:1018:1464:+[Lack 3'-end]"]                                                                                                                                                                      |
| ["rumen2009040_GL2438299_1 [gene] locus=C54306259_1:215:742:+[Lack 3'-end]"]                                                                                                                                                                              |
| ["rumen2009040_GL2485217_1 [gene] locus=scaffold2673757_1:559:1587:-[Lack 5'-end]",<br>"rumen7049_GL1880013_1 [gene] locus=C53224398_1:413:1441:-[Lack 5'-end]"]                                                                                          |
| ["rumen2009040_GL2529504_1 [gene] locus=scaffold1866361_5:2:643:+[Lack 5'-end]"]                                                                                                                                                                          |
| ["rumen2009040_GL2570907_1 [gene] locus=scaffold2401081_2:2:919:+[Lack both ends]"]                                                                                                                                                                       |
| ["rumen2009040_GL2610461_1 [gene] locus=C54775105_1:380:859:-[Complete]"]                                                                                                                                                                                 |
| ["rumen2009040_GL2643327_1 [gene] locus=scaffold862223_1:3:1091:+[Lack both ends]"]                                                                                                                                                                       |
| ["rumen2009040_GL2709124_1 [gene] locus=C54511778_1:3:797:+[Lack both ends]"]                                                                                                                                                                             |
| ["rumen2009040_GL2721007_1 [gene] locus=scaffold1171574_2:8401:9675:-[Complete]"]                                                                                                                                                                         |
| ["rumen2009040_GL2733548_1 [gene] locus=scaffold851585_2:682:1527:-[Lack 5'-end]"]                                                                                                                                                                        |
| ["rumen2009040_GL2738335_1 [gene] locus=scaffold965356_3:3:581:-[Lack both ends]"]                                                                                                                                                                        |
| ["rumen2009040_GL2949201_1 [gene] locus=scaffold1286518_1:5832:7055:+[Complete]"]                                                                                                                                                                         |
| ["rumen2009040_GL2985393_1 [gene] locus=scaffold33866_2:177:599:-[Lack 5'-end]"]                                                                                                                                                                          |
| ["rumen2009040_GL3014932_1 [gene] locus=scaffold1934946_2:3:941:+[Lack both ends]"]                                                                                                                                                                       |
| ["rumen2009040_GL3032962_1 [gene] locus=scaffold2608996_1:713:1159:+[Lack 3'-end]"]                                                                                                                                                                       |
| ["rumen2009040_GL3047245_1 [gene] locus=scaffold389369_3:2:532:-[Lack 3'-end]"]                                                                                                                                                                           |
| ["rumen2009040_GL3078576_1 [gene] locus=scaffold2277849_4:1051:2241:+[Complete]"]                                                                                                                                                                         |
| ["rumen2009040_GL3142931_1 [gene] locus=scaffold1863408_1:1:513:+[Lack both ends]"]                                                                                                                                                                       |
| ["rumen2009040_GL3145717_1 [gene] locus=scaffold3049593_1:1:549:+[Lack 5'-end]"]                                                                                                                                                                          |
| ["rumen2009040_GL3238168_1 [gene] locus=scaffold1928698_1:1:579:+[Lack both ends]"]                                                                                                                                                                       |
| ["rumen2009040_GL3249940_1 [gene] locus=scaffold143873_2:1:651:-[Lack both ends]"]                                                                                                                                                                        |

|                                                                                      |
|--------------------------------------------------------------------------------------|
| ["rumen2009040_GL3261152_1 [gene] locus=scaffold238312_2:2:520:-[Lack both ends]"]   |
| ["rumen2009040_GL3301528_1 [gene] locus=C54978614_1:3:686:-[Lack 3'-end]"]           |
| ["rumen2009040_GL3327642_1 [gene] locus=scaffold2312858_1:2:538:-[Lack both ends]"]  |
| ["rumen2009040_GL3389735_1 [gene] locus=scaffold2257468_5:497:943:-[Lack 5'-end]"]   |
| ["rumen2009040_GL3484547_1 [gene] locus=scaffold2191915_1:2:673:+[Lack both ends]"]  |
| ["rumen2009040_GL3501091_1 [gene] locus=scaffold2196175_1:2:715:-[Lack 3'-end]"]     |
| ["rumen2009040_GL3586942_1 [gene] locus=scaffold363271_2:3:506:+[Lack 5'-end]"]      |
| ["rumen2009040_GL3650488_1 [gene] locus=scaffold1244479_2:141:725:+[Lack 3'-end]"]   |
| ["rumen2009040_GL3659099_1 [gene] locus=scaffold1585469_2:3:713:+[Lack 5'-end]"]     |
| ["rumen2009040_GL3660357_1 [gene] locus=scaffold3065062_2:1825:2694:-[Lack 5'-end]"] |
| ["rumen3042_GL0000077_1 [gene] locus=scaffold1572661_1:1:558:+[Lack both ends]"]     |
| ["rumen3042_GL0032891_1 [gene] locus=scaffold2042204_4:2:514:-[Lack 3'-end]"]        |
| ["rumen3042_GL0081640_1 [gene] locus=scaffold1163097_1:817:1590:+[Lack 3'-end]"]     |
| ["rumen3042_GL0082423_1 [gene] locus=C50851480_1:3:626:+[Lack both ends]"]           |
| ["rumen3042_GL0360627_1 [gene] locus=scaffold338216_3:1956:3143:+[Complete]"]        |
| ["rumen3042_GL0486652_1 [gene] locus=C50290333_1:2:535:-[Lack both ends]"]           |
| ["rumen3042_GL0507881_1 [gene] locus=C50438823_1:3:554:-[Lack both ends]"]           |
| ["rumen3042_GL0529802_1 [gene] locus=scaffold166668_2:1:546:-[Lack 3'-end]"]         |
| ["rumen3042_GL0590771_1 [gene] locus=C50713299_1:3:599:-[Lack both ends]"]           |
| ["rumen3042_GL0640649_1 [gene] locus=scaffold613841_7:2022:2600:+[Lack 3'-end]"]     |
| ["rumen3042_GL0649954_1 [gene] locus=C50870129_1:3:629:-[Lack both ends]"]           |
| ["rumen3042_GL0670870_1 [gene] locus=scaffold856979_2:2:841:+[Lack 5'-end]"]         |
| ["rumen3042_GL0712183_1 [gene] locus=scaffold652095_2:3:506:+[Lack both ends]"]      |
| ["rumen3042_GL0822304_1 [gene] locus=scaffold1113388_2:2:751:-[Lack 3'-end]"]        |
| ["rumen3042_GL1082206_1 [gene] locus=scaffold1465853_1:1:435:+[Lack 5'-end]"]        |
| ["rumen3042_GL1098498_1 [gene] locus=scaffold2069073_1:3714:5009:+[Complete]"]       |
| ["rumen3042_GL1107395_1 [gene] locus=scaffold1093396_4:5500:5928:+[Lack 3'-end]"]    |
| ["rumen3042_GL1207560_1 [gene] locus=scaffold680221_1:3:605:-[Lack both ends]"]      |
| ["rumen3042_GL1383982_1 [gene] locus=scaffold832128_3:2:517:+[Lack 5'-end]"]         |
| ["rumen3042_GL1395732_1 [gene] locus=scaffold9535_3:41:526:-[Lack 5'-end]"]          |
| ["rumen3042_GL1401776_1 [gene] locus=scaffold1017850_7:1243:1728:+[Lack 3'-end]"]    |
| ["rumen3042_GL1442982_1 [gene] locus=scaffold1276484_2:2:868:-[Lack 3'-end]"]        |
| ["rumen3042_GL1513349_1 [gene] locus=scaffold522873_2:1:1053:+[Lack both ends]"]     |
| ["rumen3042_GL1529368_1 [gene] locus=scaffold1435774_1:884:1336:+[Lack 3'-end]"]     |
| ["rumen3042_GL1545277_1 [gene] locus=scaffold895734_1:1:600:+[Lack both ends]"]      |
| ["rumen3042_GL1599579_1 [gene] locus=scaffold960666_2:482:895:+[Lack 3'-end]"]       |
| ["rumen3042_GL1611192_1 [gene] locus=scaffold1102841_4:1:393:+[Lack 5'-end]"]        |
| ["rumen3042_GL1626821_1 [gene] locus=scaffold826559_15:2:874:+[Lack 5'-end]"]        |
| ["rumen3042_GL1789684_1 [gene] locus=scaffold1371059_3:1:483:-[Lack 3'-end]"]        |
| ["rumen3042_GL1953498_1 [gene] locus=scaffold1144998_5:2:718:-[Lack 3'-end]"]        |
| ["rumen3042_GL1980838_1 [gene] locus=scaffold5434_2:598:1038:-[Lack 5'-end]"]        |
| ["rumen3042_GL2039966_1 [gene] locus=scaffold1913087_5:1:1059:+[Lack 5'-end]"]       |
| ["rumen3042_GL2046699_1 [gene] locus=scaffold1462991_2:1:519:-[Lack both ends]"]     |



|                                                                                                                                                                                                                                                                                                                                                                                                                                                                                                 |
|-------------------------------------------------------------------------------------------------------------------------------------------------------------------------------------------------------------------------------------------------------------------------------------------------------------------------------------------------------------------------------------------------------------------------------------------------------------------------------------------------|
| ["rumen3042_GL2187846_1 [gene] locus=scaffold832128_2:1:609:+[Lack both ends]"]                                                                                                                                                                                                                                                                                                                                                                                                                 |
| ["rumen3042_GL2213686_1 [gene] locus=scaffold320746_6:1:573:-[Lack both ends]"]                                                                                                                                                                                                                                                                                                                                                                                                                 |
| ["rumen3042_GL2285557_1 [gene] locus=scaffold308203_2:121:573:-[Lack 5'-end]"]                                                                                                                                                                                                                                                                                                                                                                                                                  |
| ["rumen3042_GL2300975_1 [gene] locus=scaffold2062302_3:1:603:+[Lack 5'-end]"]                                                                                                                                                                                                                                                                                                                                                                                                                   |
| ["rumen3042_GL2356167_1 [gene] locus=C52066558_1:469:1275:+[Lack 3'-end]"]                                                                                                                                                                                                                                                                                                                                                                                                                      |
| ["rumen3042_GL2378167_1 [gene] locus=scaffold2466948_1:1:582:-[Lack both ends]"]                                                                                                                                                                                                                                                                                                                                                                                                                |
| ["rumen3042_GL2417136_1 [gene] locus=scaffold700330_1:2:406:-[Lack 3'-end]"]                                                                                                                                                                                                                                                                                                                                                                                                                    |
| ["rumen3042_GL2527931_1 [gene] locus=scaffold2529999_1:1:516:+[Lack 5'-end]"]                                                                                                                                                                                                                                                                                                                                                                                                                   |
| ["rumen552_GL0039216_1 [gene] locus=scaffold1080482_1:836:2038:-[Complete]"]                                                                                                                                                                                                                                                                                                                                                                                                                    |
| ["rumen552_GL0085050_1 [gene] locus=scaffold540319_1:677:1840:-[Complete]",<br>"rumen552_GL0154928_1 [gene] locus=scaffold1115299_1:12069:13232:-[Complete]",<br>"rumen0081_GL1513998_1 [gene] locus=scaffold722337_2:362:1525:+[Complete]",<br>"rumen2009040_GL0484223_1 [gene] locus=scaffold842821_3:813:1976:-[Complete]",<br>"rumen3042_GL0831827_1 [gene] locus=scaffold1802866_1:1918:3081:-[Complete]",<br>"rumen3042_GL2393851_1 [gene] locus=scaffold2033295_1:570:1733:+[Complete]"] |
| ["rumen552_GL0242863_1 [gene] locus=scaffold459412_2:3:590:-[Lack both ends]"]                                                                                                                                                                                                                                                                                                                                                                                                                  |
| ["rumen552_GL0286565_1 [gene] locus=scaffold110901_2:3:890:-[Lack 3'-end]"]                                                                                                                                                                                                                                                                                                                                                                                                                     |
| ["rumen552_GL0369668_1 [gene] locus=scaffold46347_2:2:643:+[Lack both ends]"]                                                                                                                                                                                                                                                                                                                                                                                                                   |
| ["rumen552_GL0500598_1 [gene] locus=scaffold214801_2:7619:8800:-[Complete]"]                                                                                                                                                                                                                                                                                                                                                                                                                    |
| ["rumen552_GL0548147_1 [gene] locus=scaffold281878_2:57425:58606:-[Complete]",<br>"rumen555_GL2221632_1 [gene] locus=scaffold391993_1:93:1274:-[Complete]",<br>"rumen100058_GL3492508_1 [gene] locus=scaffold373571_1:732:1913:+[Complete]",<br>"rumen2009040_GL3559534_1 [gene] locus=scaffold1810933_1:279:1460:+[Complete]",<br>"rumen3042_GL1654790_1 [gene] locus=scaffold246360_2:789:1970:+[Complete]"]                                                                                  |
| ["rumen552_GL0582563_1 [gene] locus=scaffold470902_1:1:993:+[Lack both ends]",<br>"rumen555_GL1019427_1 [gene] locus=scaffold132038_1:81:1073:+[Lack 3'-end]"]                                                                                                                                                                                                                                                                                                                                  |
| ["rumen552_GL0699265_1 [gene] locus=scaffold586952_1:16201:17385:-[Complete]"]                                                                                                                                                                                                                                                                                                                                                                                                                  |
| ["rumen552_GL0721882_1 [gene] locus=scaffold524092_2:48285:49523:+[Complete]",<br>"rumen0081_GL1802801_1 [gene] locus=scaffold174182_1:5853:7091:-[Complete]",<br>"rumen2009040_GL1532117_1 [gene] locus=scaffold587927_2:1686:2924:-[Complete]",<br>"rumen2009040_GL1575957_1 [gene] locus=scaffold489926_1:1242:2480:+[Complete]"]                                                                                                                                                            |
| ["rumen552_GL0771921_1 [gene] locus=scaffold1027624_4:1:705:+[Lack both ends]",<br>"rumen100058_GL1497917_1 [gene] locus=scaffold331685_6:1088:1795:-[Lack 5'-end]"]                                                                                                                                                                                                                                                                                                                            |
| ["rumen552_GL0777748_1 [gene] locus=scaffold422006_1:1:1014:+[Lack 5'-end]"]                                                                                                                                                                                                                                                                                                                                                                                                                    |
| ["rumen552_GL0840318_1 [gene] locus=scaffold255115_3:3:491:-[Lack 3'-end]"]                                                                                                                                                                                                                                                                                                                                                                                                                     |
| ["rumen552_GL0844521_1 [gene] locus=scaffold713861_5:3010:3741:-[Lack 5'-end]"]                                                                                                                                                                                                                                                                                                                                                                                                                 |
| ["rumen552_GL1249044_1 [gene] locus=scaffold369563_1:1:537:+[Lack 5'-end]"]                                                                                                                                                                                                                                                                                                                                                                                                                     |
| ["rumen552_GL1264658_1 [gene] locus=scaffold290549_2:1467:2054:-[Lack 5'-end]"]                                                                                                                                                                                                                                                                                                                                                                                                                 |
| ["rumen552_GL1417868_1 [gene] locus=scaffold954837_1:2:469:-[Lack 3'-end]"]                                                                                                                                                                                                                                                                                                                                                                                                                     |
| ["rumen552_GL1478576_1 [gene] locus=scaffold576867_1:3:818:-[Lack 3'-end]"]                                                                                                                                                                                                                                                                                                                                                                                                                     |
| ["rumen552_GL1487998_1 [gene] locus=scaffold1064081_2:102:1091:+[Lack 3'-end]"]                                                                                                                                                                                                                                                                                                                                                                                                                 |
| ["rumen552_GL1503956_1 [gene] locus=scaffold149647_1:938:1633:-[Lack 5'-end]",<br>"rumen100058_GL1685929_1 [gene] locus=scaffold556929_2:2:697:+[Lack 5'-end]"]                                                                                                                                                                                                                                                                                                                                 |

|                                                                                                                                                                                                                                                                                                                                                                                                                                                                                                                                                                                                                                                 |
|-------------------------------------------------------------------------------------------------------------------------------------------------------------------------------------------------------------------------------------------------------------------------------------------------------------------------------------------------------------------------------------------------------------------------------------------------------------------------------------------------------------------------------------------------------------------------------------------------------------------------------------------------|
| "rumen100058_GL2854153_1 [gene] locus=scaffold1175549_1:1:696:+[Lack 5'-end]"                                                                                                                                                                                                                                                                                                                                                                                                                                                                                                                                                                   |
| "rumen552_GL1568100_1 [gene] locus=C21196678_1:1:471:-[Lack 3'-end]",<br>"rumen100058_GL3505946_1 [gene] locus=scaffold3284786_1:128:598:+[Lack 3'-end]"                                                                                                                                                                                                                                                                                                                                                                                                                                                                                        |
| "rumen552_GL1593398_1 [gene] locus=C21827437_1:1:834:+[Lack both ends]"                                                                                                                                                                                                                                                                                                                                                                                                                                                                                                                                                                         |
| "rumen552_GL1689901_1 [gene] locus=scaffold921789_1:2:652:-[Lack 3'-end]"                                                                                                                                                                                                                                                                                                                                                                                                                                                                                                                                                                       |
| "rumen553_GL0032227_1 [gene] locus=scaffold284480_1:221:850:-[Lack 5'-end]"                                                                                                                                                                                                                                                                                                                                                                                                                                                                                                                                                                     |
| "rumen553_GL0049253_1 [gene] locus=scaffold182048_1:151:612:-[Lack 5'-end]"                                                                                                                                                                                                                                                                                                                                                                                                                                                                                                                                                                     |
| "rumen553_GL0094054_1 [gene] locus=scaffold44886_6:2:589:+[Lack both ends]"                                                                                                                                                                                                                                                                                                                                                                                                                                                                                                                                                                     |
| "rumen553_GL0104245_1 [gene] locus=scaffold48459_1:2:826:-[Lack 3'-end]",<br>"rumen553_GL0163953_1 [gene] locus=scaffold433511_1:2:826:-[Lack 3'-end]"                                                                                                                                                                                                                                                                                                                                                                                                                                                                                          |
| "rumen553_GL0105999_1 [gene] locus=scaffold57686_1:8066:9217:-[Complete]",<br>"rumen552_GL0631529_1 [gene] locus=scaffold1026447_1:1848:2999:-[Complete]",<br>"rumen552_GL1141348_1 [gene] locus=scaffold649643_3:278:1429:-[Complete]",<br>"rumen554_GL2237796_1 [gene] locus=scaffold1021761_3:371:1522:+[Complete]",<br>"rumen555_GL0791420_1 [gene] locus=scaffold55176_1:556:1707:+[Complete]",<br>"rumen555_GL1977253_1 [gene] locus=scaffold429328_2:2885:4036:-[Complete]",<br>"rumen0081_GL0347789_1 [gene] locus=scaffold9084_2:355:1506:-[Complete]",<br>"rumen3042_GL1357986_1 [gene] locus=scaffold830021_2:1113:2264:-[Complete]" |
| "rumen553_GL0120895_1 [gene] locus=scaffold9924_1:135:1016:+[Lack 3'-end]"                                                                                                                                                                                                                                                                                                                                                                                                                                                                                                                                                                      |
| "rumen553_GL0127650_1 [gene] locus=C7765883_1:13079:14320:-[Complete]"                                                                                                                                                                                                                                                                                                                                                                                                                                                                                                                                                                          |
| "rumen553_GL0136564_1 [gene] locus=scaffold102846_5:7726:8931:-[Lack 5'-end]",<br>"rumen554_GL1996354_1 [gene] locus=scaffold248758_5:29404:30609:-[Complete]"                                                                                                                                                                                                                                                                                                                                                                                                                                                                                  |
| "rumen553_GL0136884_1 [gene] locus=scaffold122658_7:2:1009:+[Lack 5'-end]"                                                                                                                                                                                                                                                                                                                                                                                                                                                                                                                                                                      |
| "rumen553_GL0187129_1 [gene] locus=scaffold8660_4:476:1657:-[Complete]",<br>"rumen583_GL0789265_1 [gene] locus=scaffold123359_1:399:1580:-[Complete]",<br>"rumen554_GL0152551_1 [gene] locus=scaffold949638_2:1511:2692:+[Complete]",<br>"rumen555_GL1400296_1 [gene] locus=scaffold364272_1:352:1533:+[Complete]",<br>"rumen100058_GL0097486_1 [gene] locus=scaffold749237_1:3946:5127:-[Complete]",<br>"rumen100058_GL2831528_1 [gene] locus=scaffold2732103_1:1612:2793:+[Complete]",<br>"rumen7049_GL1440001_1 [gene] locus=scaffold1049146_2:1557:2738:-[Complete]"                                                                        |
| "rumen553_GL0188465_1 [gene] locus=scaffold25813_1:490:1578:-[Lack 5'-end]"                                                                                                                                                                                                                                                                                                                                                                                                                                                                                                                                                                     |
| "rumen553_GL0334707_1 [gene] locus=scaffold201627_1:2:376:-[Lack 3'-end]"                                                                                                                                                                                                                                                                                                                                                                                                                                                                                                                                                                       |
| "rumen553_GL0387359_1 [gene] locus=scaffold335962_2:45:1277:-[Lack 5'-end]"                                                                                                                                                                                                                                                                                                                                                                                                                                                                                                                                                                     |
| "rumen553_GL0579940_1 [gene] locus=scaffold192080_2:2:559:+[Lack both ends]"                                                                                                                                                                                                                                                                                                                                                                                                                                                                                                                                                                    |
| "rumen553_GL0598510_1 [gene] locus=scaffold112080_2:1983:2696:+[Lack 3'-end]",<br>"rumen553_GL0892836_1 [gene] locus=scaffold24477_5:1:714:+[Lack both ends]",<br>"rumen0081_GL1007375_1 [gene] locus=scaffold731738_1:120:833:+[Lack 3'-end]"                                                                                                                                                                                                                                                                                                                                                                                                  |
| "rumen553_GL0617458_1 [gene] locus=C7520020_1:1:828:-[Lack 3'-end]",<br>"rumen100058_GL1891813_1 [gene] locus=scaffold2096473_3:183:1010:+[Lack 3'-end]"                                                                                                                                                                                                                                                                                                                                                                                                                                                                                        |
| "rumen553_GL0781215_1 [gene] locus=scaffold432384_1:202:1281:-[Lack 5'-end]",<br>"rumen555_GL0742391_1 [gene] locus=C28670528_1:2:1078:-[Lack 3'-end]"                                                                                                                                                                                                                                                                                                                                                                                                                                                                                          |
| "rumen553_GL0807801_1 [gene] locus=scaffold92562_2:5954:7120:-[Complete]",<br>"rumen2009040_GL0346636_1 [gene] locus=scaffold808408_2:7184:8350:-[Complete]"                                                                                                                                                                                                                                                                                                                                                                                                                                                                                    |

|                                                                                                                                                                                                                                                                                                                                                    |
|----------------------------------------------------------------------------------------------------------------------------------------------------------------------------------------------------------------------------------------------------------------------------------------------------------------------------------------------------|
| <p>"rumen553_GL0862617_1 [gene] locus=scaffold105027_1:238:792:-[Lack 5'-end]",</p> <p>"rumen7049_GL2283102_1 [gene] locus=C51488427_1:1:552:+[Lack both ends]"</p>                                                                                                                                                                                |
| <p>"rumen553_GL0904326_1 [gene] locus=scaffold329167_4:2:697:-[Lack both ends]"</p>                                                                                                                                                                                                                                                                |
| <p>"rumen553_GL0907209_1 [gene] locus=scaffold177577_1:3:716:+[Lack 5'-end]",</p> <p>"rumen100058_GL3039379_1 [gene] locus=scaffold832335_7:1260:1973:-[Lack 5'-end]",</p> <p>"rumen100058_GL3231998_1 [gene] locus=scaffold2351752_5:1:714:+[Lack 5'-end]",</p> <p>"rumen3042_GL1141595_1 [gene] locus=scaffold419096_2:1:714:+[Lack 5'-end]"</p> |
| <p>"rumen553_GL0917056_1 [gene] locus=scaffold217147_1:2:664:-[Lack 3'-end]"</p>                                                                                                                                                                                                                                                                   |
| <p>"rumen554_GL0012127_1 [gene] locus=scaffold42727_2:140:1063:+[Lack 3'-end]"</p>                                                                                                                                                                                                                                                                 |
| <p>"rumen554_GL0054969_1 [gene] locus=scaffold813972_1:100:762:+[Lack 3'-end]"</p>                                                                                                                                                                                                                                                                 |
| <p>"rumen554_GL0085145_1 [gene] locus=scaffold1234497_1:3:797:-[Lack both ends]"</p>                                                                                                                                                                                                                                                               |
| <p>"rumen554_GL0100604_1 [gene] locus=scaffold1392860_1:2:520:+[Lack both ends]"</p>                                                                                                                                                                                                                                                               |
| <p>"rumen554_GL0125272_1 [gene] locus=scaffold13977_1:381:944:+[Lack 3'-end]"</p>                                                                                                                                                                                                                                                                  |
| <p>"rumen554_GL0182616_1 [gene] locus=scaffold39392_1:29403:30608:+[Complete]",</p> <p>"rumen554_GL0850290_1 [gene] locus=scaffold492265_1:1435:2640:-[Complete]",</p> <p>"rumen100058_GL0954979_1 [gene] locus=scaffold1877489_1:1440:2645:-[Complete]",</p> <p>"rumen7049_GL1761271_1 [gene] locus=scaffold2267949_1:415:1620:+[Complete]"</p>   |
| <p>"rumen554_GL0240059_1 [gene] locus=scaffold1824264_2:250:699:+[Lack 3'-end]"</p>                                                                                                                                                                                                                                                                |
| <p>"rumen554_GL0292759_1 [gene] locus=scaffold683178_1:83:1333:+[Complete]"</p>                                                                                                                                                                                                                                                                    |
| <p>"rumen554_GL0300352_1 [gene] locus=scaffold1652984_1:2:745:-[Lack 3'-end]"</p>                                                                                                                                                                                                                                                                  |
| <p>"rumen554_GL0332523_1 [gene] locus=scaffold1493107_1:603:1754:-[Complete]",</p> <p>"rumen554_GL2352802_1 [gene] locus=scaffold1127205_3:5530:6681:+[Complete]",</p> <p>"rumen0081_GL2416988_1 [gene] locus=scaffold845286_7:645:1796:+[Complete]",</p> <p>"rumen2009040_GL2887569_1 [gene] locus=scaffold60859_4:5530:6681:+[Complete]"</p>     |
| <p>"rumen554_GL0346167_1 [gene] locus=scaffold2052939_1:2:469:-[Lack 3'-end]"</p>                                                                                                                                                                                                                                                                  |
| <p>"rumen554_GL0354756_1 [gene] locus=C40912160_1:3:980:+[Lack both ends]"</p>                                                                                                                                                                                                                                                                     |
| <p>"rumen554_GL0396792_1 [gene] locus=scaffold162544_1:3309:4517:+[Complete]"</p>                                                                                                                                                                                                                                                                  |
| <p>"rumen554_GL0401470_1 [gene] locus=scaffold919471_1:2:691:-[Lack 3'-end]"</p>                                                                                                                                                                                                                                                                   |
| <p>"rumen554_GL0500642_1 [gene] locus=scaffold1202093_1:3:695:+[Lack 5'-end]"</p>                                                                                                                                                                                                                                                                  |
| <p>"rumen554_GL0572441_1 [gene] locus=scaffold1666900_4:3:959:-[Lack 3'-end]",</p> <p>"rumen0081_GL0118621_1 [gene] locus=scaffold2020316_1:3:959:-[Lack 3'-end]",</p> <p>"rumen2009040_GL1577303_1 [gene] locus=scaffold1931446_5:1354:2310:+[Lack 3'-end]"</p>                                                                                   |
| <p>"rumen554_GL0573574_1 [gene] locus=scaffold2141052_1:1:1023:+[Lack 5'-end]"</p>                                                                                                                                                                                                                                                                 |
| <p>"rumen554_GL0645103_1 [gene] locus=scaffold1346050_1:3:569:+[Lack both ends]",</p> <p>"rumen2009040_GL3553905_1 [gene] locus=scaffold2776935_3:3:569:+[Lack both ends]"</p>                                                                                                                                                                     |
| <p>"rumen554_GL0657441_1 [gene] locus=scaffold334047_1:3:851:+[Lack 5'-end]",</p> <p>"rumen554_GL1500979_1 [gene] locus=scaffold1433067_1:2:850:+[Lack 5'-end]"</p>                                                                                                                                                                                |
| <p>"rumen554_GL0672460_1 [gene] locus=scaffold208804_1:3:500:+[Lack 5'-end]",</p> <p>"rumen0081_GL2431247_1 [gene] locus=scaffold341010_2:124:621:-[Lack 5'-end]"</p>                                                                                                                                                                              |
| <p>"rumen554_GL0708177_1 [gene] locus=scaffold2154111_1:2:754:-[Lack 3'-end]"</p>                                                                                                                                                                                                                                                                  |
| <p>"rumen554_GL0727547_1 [gene] locus=scaffold193632_3:3230:4390:-[Complete]",</p> <p>"rumen555_GL1401098_1 [gene] locus=scaffold783584_1:26596:27756:+[Complete]",</p> <p>"rumen7049_GL1553500_1 [gene] locus=scaffold983776_2:7381:8541:-[Complete]"</p>                                                                                         |

|                                                                                                                                                                                                                                                                                                                                                                                                                           |
|---------------------------------------------------------------------------------------------------------------------------------------------------------------------------------------------------------------------------------------------------------------------------------------------------------------------------------------------------------------------------------------------------------------------------|
| ["rumen554_GL0758983_1 [gene] locus=scaffold1120851_1:1455:2231:-[Lack 5'-end]",<br>"rumen555_GL1872305_1 [gene] locus=C28685599_1:347:1123:-[Lack 5'-end]"]                                                                                                                                                                                                                                                              |
| ["rumen554_GL0778519_1 [gene] locus=scaffold2116913_2:3:896:+[Lack both ends]",<br>"rumen0081_GL1264715_1 [gene] locus=scaffold125895_1:436:1329:+[Lack 3'-end]"]                                                                                                                                                                                                                                                         |
| ["rumen554_GL0806989_1 [gene] locus=scaffold1758895_1:2:634:-[Lack both ends]"]                                                                                                                                                                                                                                                                                                                                           |
| ["rumen554_GL0836579_1 [gene] locus=scaffold755456_1:546:1154:+[Lack 3'-end]"]                                                                                                                                                                                                                                                                                                                                            |
| ["rumen554_GL0851428_1 [gene] locus=scaffold1896722_1:1583:2515:-[Lack 5'-end]"]                                                                                                                                                                                                                                                                                                                                          |
| ["rumen554_GL0890659_1 [gene] locus=scaffold749086_3:328:1029:-[Lack 5'-end]"]                                                                                                                                                                                                                                                                                                                                            |
| ["rumen554_GL0911586_1 [gene] locus=scaffold462637_7:778:1446:-[Lack 5'-end]"]                                                                                                                                                                                                                                                                                                                                            |
| ["rumen554_GL0958608_1 [gene] locus=scaffold787818_2:1473:2315:+[Lack 3'-end]",<br>"rumen0081_GL2325519_1 [gene] locus=scaffold1988499_1:149:991:+[Lack 3'-end]",<br>"rumen100058_GL1509214_1 [gene] locus=scaffold79783_1:3:845:-[Lack both ends]",<br>"rumen2009040_GL1742284_1 [gene] locus=scaffold661798_1:3:845:-[Lack both ends]",<br>"rumen7049_GL1224206_1 [gene] locus=scaffold2079380_2:1:843:-[Lack 3'-end]"] |
| ["rumen554_GL1022914_1 [gene] locus=scaffold3793_1:206:610:+[Lack 3'-end]"]                                                                                                                                                                                                                                                                                                                                               |
| ["rumen554_GL1061123_1 [gene] locus=scaffold2134084_2:1:675:+[Lack both ends]"]                                                                                                                                                                                                                                                                                                                                           |
| ["rumen554_GL1074776_1 [gene] locus=scaffold311408_3:3:869:+[Lack 5'-end]"]                                                                                                                                                                                                                                                                                                                                               |
| ["rumen554_GL1096009_1 [gene] locus=scaffold174776_5:1625:2503:+[Lack 3'-end]"]                                                                                                                                                                                                                                                                                                                                           |
| ["rumen554_GL1132063_1 [gene] locus=scaffold657036_2:2:523:-[Lack 3'-end]",<br>"rumen7049_GL1194147_1 [gene] locus=scaffold857149_2:4142:4663:+[Lack 3'-end]"]                                                                                                                                                                                                                                                            |
| ["rumen554_GL1135522_1 [gene] locus=scaffold61351_3:3:974:+[Lack 5'-end]",<br>"rumen554_GL2325817_1 [gene] locus=scaffold2114121_1:1:969:+[Lack both ends]"]                                                                                                                                                                                                                                                              |
| ["rumen554_GL1155624_1 [gene] locus=scaffold387244_1:2037:2528:+[Lack 3'-end]"]                                                                                                                                                                                                                                                                                                                                           |
| ["rumen554_GL1171239_1 [gene] locus=C40964752_1:2:679:-[Lack 3'-end]"]                                                                                                                                                                                                                                                                                                                                                    |
| ["rumen554_GL1208580_1 [gene] locus=scaffold1415190_1:3:839:+[Lack 5'-end]"]                                                                                                                                                                                                                                                                                                                                              |
| ["rumen554_GL1280624_1 [gene] locus=scaffold1336613_1:18447:19637:-[Complete]"]                                                                                                                                                                                                                                                                                                                                           |
| ["rumen554_GL1300648_1 [gene] locus=scaffold619368_3:1944:2609:+[Lack 3'-end]",<br>"rumen100058_GL1913305_1 [gene] locus=scaffold675000_2:184:849:+[Lack 3'-end]"]                                                                                                                                                                                                                                                        |
| ["rumen554_GL1368563_1 [gene] locus=scaffold1146150_1:71:697:+[Lack 3'-end]"]                                                                                                                                                                                                                                                                                                                                             |
| ["rumen554_GL1412696_1 [gene] locus=C40619984_1:441:830:+[Lack 3'-end]"]                                                                                                                                                                                                                                                                                                                                                  |
| ["rumen554_GL1421284_1 [gene] locus=scaffold426545_1:2:553:-[Lack both ends]"]                                                                                                                                                                                                                                                                                                                                            |
| ["rumen554_GL1650053_1 [gene] locus=scaffold937640_1:2:481:-[Lack 3'-end]"]                                                                                                                                                                                                                                                                                                                                               |
| ["rumen554_GL1663424_1 [gene] locus=scaffold1797843_1:3:1043:+[Lack 5'-end]"]                                                                                                                                                                                                                                                                                                                                             |
| ["rumen554_GL1697992_1 [gene] locus=scaffold33533_1:2:1036:-[Lack 3'-end]"]                                                                                                                                                                                                                                                                                                                                               |
| ["rumen554_GL1781224_1 [gene] locus=scaffold702412_4:875:1741:+[Complete]"]                                                                                                                                                                                                                                                                                                                                               |
| ["rumen554_GL1805054_1 [gene] locus=scaffold792886_2:129:506:+[Lack 3'-end]"]                                                                                                                                                                                                                                                                                                                                             |
| ["rumen554_GL1861872_1 [gene] locus=scaffold57384_2:835:1902:-[Lack 5'-end]"]                                                                                                                                                                                                                                                                                                                                             |
| ["rumen554_GL1911309_1 [gene] locus=scaffold971075_1:1645:2085:-[Lack 5'-end]",<br>"rumen100058_GL0463803_1 [gene] locus=scaffold55392_3:499:939:-[Lack 5'-end]"]                                                                                                                                                                                                                                                         |
| ["rumen554_GL1924440_1 [gene] locus=scaffold502985_2:2:607:+[Lack 5'-end]"]                                                                                                                                                                                                                                                                                                                                               |
| ["rumen554_GL1957605_1 [gene] locus=scaffold267550_10:3:632:+[Lack both ends]"]                                                                                                                                                                                                                                                                                                                                           |
| ["rumen554_GL2085541_1 [gene] locus=scaffold2042893_7:872:1465:+[Lack 3'-end]"]                                                                                                                                                                                                                                                                                                                                           |
| ["rumen554_GL2092833_1 [gene] locus=scaffold3184_1:1:648:+[Lack both ends]"]                                                                                                                                                                                                                                                                                                                                              |

|                                                                                                                                                                                                                                                |
|------------------------------------------------------------------------------------------------------------------------------------------------------------------------------------------------------------------------------------------------|
| "rumen554_GL2119682_1 [gene] locus=scaffold1385282_1:1:585:-[Lack both ends]"                                                                                                                                                                  |
| "rumen554_GL2218541_1 [gene] locus=scaffold59206_4:1:414:+[Lack 5'-end]"                                                                                                                                                                       |
| "rumen554_GL2219709_1 [gene] locus=scaffold546825_3:457:1224:+[Lack 3'-end]",<br>"rumen554_GL2227990_1 [gene] locus=scaffold1191787_1:3:770:+[Lack both ends]"                                                                                 |
| "rumen554_GL2270870_1 [gene] locus=scaffold981268_5:38:706:-[Lack 5'-end]",<br>"rumen100058_GL0745214_1 [gene] locus=scaffold412313_7:1547:2215:-[Lack 5'-end]"                                                                                |
| "rumen554_GL2293751_1 [gene] locus=scaffold1981977_2:1:609:+[Lack both ends]"                                                                                                                                                                  |
| "rumen554_GL2404831_1 [gene] locus=scaffold8458_1:3:641:+[Lack 5'-end]",<br>"rumen555_GL1808978_1 [gene] locus=scaffold1488613_1:6603:7241:-[Lack 5'-end]",<br>"rumen2009040_GL1927750_1 [gene] locus=scaffold1063027_4:72:710:-[Lack 5'-end]" |
| "rumen554_GL2519626_1 [gene] locus=C41442967_1:833:1621:-[Lack 5'-end]"                                                                                                                                                                        |
| "rumen554_GL2531083_1 [gene] locus=scaffold921667_1:2:592:+[Lack both ends]"                                                                                                                                                                   |
| "rumen554_GL2591305_1 [gene] locus=scaffold39542_1:3:899:+[Lack 5'-end]"                                                                                                                                                                       |
| "rumen554_GL2591323_1 [gene] locus=scaffold115202_1:3:785:+[Lack both ends]"                                                                                                                                                                   |
| "rumen554_GL2686984_1 [gene] locus=scaffold1713000_4:3:620:-[Lack 3'-end]"                                                                                                                                                                     |
| "rumen554_GL2776916_1 [gene] locus=C39348879_1:3:488:+[Lack 5'-end]",<br>"rumen0081_GL2388531_1 [gene] locus=scaffold789850_4:213:698:-[Lack 5'-end]"                                                                                          |
| "rumen554_GL2796675_1 [gene] locus=scaffold728367_1:2:1075:-[Lack 3'-end]"                                                                                                                                                                     |
| "rumen554_GL2848765_1 [gene] locus=scaffold115438_6:10680:11390:+[Lack 3'-end]"                                                                                                                                                                |
| "rumen554_GL2884883_1 [gene] locus=scaffold633_1:1:621:+[Lack both ends]",<br>"rumen3042_GL1065810_1 [gene] locus=scaffold1435381_1:1:621:-[Lack 3'-end]"                                                                                      |
| "rumen554_GL3132768_1 [gene] locus=scaffold1277686_1:3:857:-[Lack 3'-end]"                                                                                                                                                                     |
| "rumen555_GL0080071_1 [gene] locus=scaffold666065_2:2:1123:-[Lack 3'-end]"                                                                                                                                                                     |
| "rumen555_GL0104764_1 [gene] locus=scaffold935166_1:3:923:+[Lack both ends]"                                                                                                                                                                   |
| "rumen555_GL0134205_1 [gene] locus=scaffold510840_2:1:561:+[Lack both ends]"                                                                                                                                                                   |
| "rumen555_GL0170867_1 [gene] locus=scaffold731622_1:2:505:-[Lack both ends]"                                                                                                                                                                   |
| "rumen555_GL0314564_1 [gene] locus=scaffold1305566_2:1:789:-[Lack 3'-end]"                                                                                                                                                                     |
| "rumen555_GL0374273_1 [gene] locus=scaffold506691_1:55:1278:-[Complete]",<br>"rumen2009040_GL2389521_1 [gene] locus=scaffold685648_3:51423:52646:-[Complete]"                                                                                  |
| "rumen555_GL0380294_1 [gene] locus=scaffold392642_1:1:828:+[Lack 5'-end]"                                                                                                                                                                      |
| "rumen555_GL0410025_1 [gene] locus=C27283631_1:86:535:+[Lack 3'-end]"                                                                                                                                                                          |
| "rumen555_GL0424271_1 [gene] locus=scaffold1136221_1:2439:3473:-[Lack 5'-end]"                                                                                                                                                                 |
| "rumen555_GL0468659_1 [gene] locus=scaffold797069_3:2:514:+[Lack 5'-end]"                                                                                                                                                                      |
| "rumen555_GL0498161_1 [gene] locus=scaffold373179_18:2731:3744:+[Complete]"                                                                                                                                                                    |
| "rumen555_GL0517816_1 [gene] locus=C27940816_1:289:687:+[Lack 3'-end]"                                                                                                                                                                         |
| "rumen555_GL0543964_1 [gene] locus=scaffold516737_1:2:448:-[Lack 3'-end]"                                                                                                                                                                      |
| "rumen555_GL0590856_1 [gene] locus=C27343339_1:1:546:+[Lack both ends]"                                                                                                                                                                        |
| "rumen555_GL0608207_1 [gene] locus=scaffold851016_3:1:651:+[Lack both ends]",<br>"rumen3042_GL1063357_1 [gene] locus=scaffold256792_2:3:653:+[Lack both ends]"                                                                                 |
| "rumen555_GL0616059_1 [gene] locus=scaffold549975_1:2285:3433:-[Complete]"                                                                                                                                                                     |
| "rumen555_GL0793359_1 [gene] locus=scaffold1234583_1:2038:3219:+[Complete]"                                                                                                                                                                    |
| "rumen555_GL0858113_1 [gene] locus=scaffold709998_1:575:1765:-[Complete]"                                                                                                                                                                      |
| "rumen555_GL0884194_1 [gene] locus=scaffold547954_4:2:1042:-[Lack 3'-end]"                                                                                                                                                                     |

|                                                                                                                                                                                                                                                      |
|------------------------------------------------------------------------------------------------------------------------------------------------------------------------------------------------------------------------------------------------------|
| ["rumen555_GL0886278_1 [gene] locus=scaffold893410_2:2:397:+[Lack 5'-end]"]                                                                                                                                                                          |
| ["rumen555_GL0914457_1 [gene] locus=scaffold459220_5:304:753:+[Lack 3'-end]",<br>"rumen2009040_GL0313435_1 [gene] locus=scaffold1369777_1:3:452:-[Lack 3'-end]"]                                                                                     |
| ["rumen555_GL0969156_1 [gene] locus=scaffold591525_1:25703:26947:+[Complete]"]                                                                                                                                                                       |
| ["rumen555_GL1050486_1 [gene] locus=scaffold1305566_1:3890:4465:-[Lack 5'-end]"]                                                                                                                                                                     |
| ["rumen555_GL1111884_1 [gene] locus=scaffold1572667_1:3:1151:+[Lack 5'-end]"]                                                                                                                                                                        |
| ["rumen555_GL1158001_1 [gene] locus=scaffold1516884_1:2:505:-[Lack 3'-end]"]                                                                                                                                                                         |
| ["rumen555_GL1215771_1 [gene] locus=scaffold1328731_1:2781:4022:+[Complete]"]                                                                                                                                                                        |
| ["rumen555_GL1224500_1 [gene] locus=scaffold1462285_1:30:569:+[Complete]"]                                                                                                                                                                           |
| ["rumen555_GL1231214_1 [gene] locus=scaffold199175_2:1:1470:+[Lack 5'-end]"]                                                                                                                                                                         |
| ["rumen555_GL1231597_1 [gene] locus=scaffold797069_2:171:761:+[Lack 3'-end]"]                                                                                                                                                                        |
| ["rumen555_GL1245918_1 [gene] locus=scaffold985819_3:1:564:-[Lack both ends]"]                                                                                                                                                                       |
| ["rumen555_GL1293304_1 [gene] locus=scaffold818338_1:469:1542:-[Lack 5'-end]"]                                                                                                                                                                       |
| ["rumen555_GL1307302_1 [gene] locus=scaffold1428946_1:2:1210:-[Lack 3'-end]"]                                                                                                                                                                        |
| ["rumen555_GL1334155_1 [gene] locus=scaffold32475_4:267:914:-[Lack 5'-end]"]                                                                                                                                                                         |
| ["rumen555_GL1367432_1 [gene] locus=scaffold1293417_3:153:953:-[Lack 5'-end]"]                                                                                                                                                                       |
| ["rumen555_GL1418540_1 [gene] locus=scaffold41798_2:1:693:-[Lack 3'-end]"]                                                                                                                                                                           |
| ["rumen555_GL1584984_1 [gene] locus=scaffold622151_1:60:887:-[Lack 5'-end]",<br>"rumen100058_GL0418175_1 [gene] locus=scaffold3166935_3:3:827:-[Lack both ends]"]                                                                                    |
| ["rumen555_GL1625263_1 [gene] locus=scaffold1471599_1:1:1044:+[Lack 5'-end]"]                                                                                                                                                                        |
| ["rumen555_GL1655219_1 [gene] locus=scaffold840906_1:1:996:+[Lack 5'-end]"]                                                                                                                                                                          |
| ["rumen555_GL1691522_1 [gene] locus=scaffold1028955_1:294:1319:+[Lack 3'-end]"]                                                                                                                                                                      |
| ["rumen555_GL1918429_1 [gene] locus=scaffold748424_1:374:925:-[Lack 5'-end]"]                                                                                                                                                                        |
| ["rumen555_GL1982210_1 [gene] locus=scaffold895244_1:123:1037:-[Lack 5'-end]"]                                                                                                                                                                       |
| ["rumen555_GL2151353_1 [gene] locus=scaffold1167006_4:2:1108:+[Lack 5'-end]",<br>"rumen100058_GL3483883_1 [gene] locus=scaffold433089_4:65:1171:-[Lack 5'-end]"]                                                                                     |
| ["rumen555_GL2243424_1 [gene] locus=scaffold803255_2:3:494:+[Lack 5'-end]"]                                                                                                                                                                          |
| ["rumen555_GL2319609_1 [gene] locus=scaffold1260338_1:3:557:-[Lack 3'-end]"]                                                                                                                                                                         |
| ["rumen583_GL0030501_1 [gene] locus=scaffold40597_2:1:777:-[Lack 3'-end]"]                                                                                                                                                                           |
| ["rumen583_GL0055845_1 [gene] locus=scaffold100224_1:1133:1585:+[Lack 3'-end]"]                                                                                                                                                                      |
| ["rumen583_GL0145131_1 [gene] locus=scaffold66916_3:28768:30021:+[Complete]"]                                                                                                                                                                        |
| ["rumen583_GL0167007_1 [gene] locus=scaffold322842_1:1388:2209:+[Lack 3'-end]"]                                                                                                                                                                      |
| ["rumen583_GL0252536_1 [gene] locus=scaffold276320_6:1:1017:+[Lack 5'-end]"]                                                                                                                                                                         |
| ["rumen583_GL0354459_1 [gene] locus=scaffold293415_1:1:519:+[Lack both ends]"]                                                                                                                                                                       |
| ["rumen583_GL0431108_1 [gene] locus=scaffold119251_4:2:517:+[Lack 5'-end]"]                                                                                                                                                                          |
| ["rumen583_GL0461410_1 [gene] locus=C5270796_1:1:714:+[Lack both ends]",<br>"rumen7049_GL0846476_1 [gene] locus=scaffold24484_5:264:980:-[Lack 5'-end]"]                                                                                             |
| ["rumen583_GL0579141_1 [gene] locus=scaffold234249_1:197:1411:+[Complete]"]                                                                                                                                                                          |
| ["rumen583_GL0593259_1 [gene] locus=scaffold225231_3:2:721:+[Lack 5'-end]",<br>"rumen100058_GL0607858_1 [gene] locus=scaffold1877422_1:2:718:-[Lack both ends]",<br>"rumen100058_GL1451096_1 [gene] locus=scaffold1746242_2:257:976:-[Lack 5'-end]"] |
| ["rumen583_GL0597670_1 [gene] locus=scaffold154057_1:374:1330:-[Lack 5'-end]",<br>"rumen100058_GL2039320_1 [gene] locus=scaffold1180521_2:2:958:+[Lack 5'-end]"]                                                                                     |

|                                                                                                                                                                                                                                                 |
|-------------------------------------------------------------------------------------------------------------------------------------------------------------------------------------------------------------------------------------------------|
| "rumen583_GL0636884_1 [gene] locus=scaffold26514_5:882:1427:-[Lack 5'-end]",<br>"rumen2009040_GL0487544_1 [gene] locus=scaffold2722183_1:223:768:-[Complete]",<br>"rumen2009040_GL1346976_1 [gene] locus=scaffold626730_2:3:548:+[Lack 5'-end]" |
| "rumen583_GL0656802_1 [gene] locus=scaffold59857_3:1739:2713:+[Complete]",<br>"rumen100058_GL2886937_1 [gene] locus=scaffold2331360_3:1:972:-[Lack 3'-end]"                                                                                     |
| "rumen583_GL0767689_1 [gene] locus=scaffold100224_2:3:638:+[Lack both ends]"                                                                                                                                                                    |
| "rumen583_GL0812118_1 [gene] locus=scaffold266994_3:1:651:-[Lack 3'-end]",<br>"rumen3042_GL0081189_1 [gene] locus=scaffold1626490_7:1:651:-[Lack 3'-end]"                                                                                       |
| "rumen583_GL0813063_1 [gene] locus=scaffold312526_2:2:682:+[Lack both ends]"                                                                                                                                                                    |
| "rumen7049_GL0001507_1 [gene] locus=scaffold915750_2:1:939:-[Lack 3'-end]"                                                                                                                                                                      |
| "rumen7049_GL0635957_1 [gene] locus=scaffold722081_2:1257:1841:-[Lack 5'-end]"                                                                                                                                                                  |
| "rumen7049_GL0750973_1 [gene] locus=scaffold2063222_2:1:732:-[Lack both ends]"                                                                                                                                                                  |
| "rumen7049_GL0773160_1 [gene] locus=scaffold1064_2:2:550:+[Lack both ends]"                                                                                                                                                                     |
| "rumen7049_GL0819564_1 [gene] locus=scaffold670055_1:1:981:+[Lack both ends]"                                                                                                                                                                   |
| "rumen7049_GL0824516_1 [gene] locus=scaffold1783065_1:1:576:+[Lack both ends]"                                                                                                                                                                  |
| "rumen7049_GL0874726_1 [gene] locus=scaffold883397_2:1830:2708:+[Lack 3'-end]"                                                                                                                                                                  |
| "rumen7049_GL0991234_1 [gene] locus=scaffold66671_4:242:1267:-[Lack 5'-end]"                                                                                                                                                                    |
| "rumen7049_GL1119867_1 [gene] locus=scaffold941244_4:386:916:-[Lack 5'-end]"                                                                                                                                                                    |
| "rumen7049_GL1221953_1 [gene] locus=scaffold504049_3:264:716:+[Lack 3'-end]"                                                                                                                                                                    |
| "rumen7049_GL1261530_1 [gene] locus=scaffold374494_1:1:1098:+[Lack both ends]"                                                                                                                                                                  |
| "rumen7049_GL1342434_1 [gene] locus=scaffold1452838_3:2:823:+[Lack both ends]"                                                                                                                                                                  |
| "rumen7049_GL1413700_1 [gene] locus=scaffold908729_2:1207:1842:-[Lack 5'-end]",<br>"rumen7049_GL1873633_1 [gene] locus=scaffold1229850_4:1:636:+[Lack 5'-end]"                                                                                  |
| "rumen7049_GL1419103_1 [gene] locus=scaffold868215_1:3:461:-[Lack 3'-end]"                                                                                                                                                                      |
| "rumen7049_GL1433169_1 [gene] locus=scaffold10855_1:1347:1850:-[Lack 5'-end]"                                                                                                                                                                   |
| "rumen7049_GL1449797_1 [gene] locus=C51701869_1:130:588:-[Lack 5'-end]"                                                                                                                                                                         |
| "rumen7049_GL1453544_1 [gene] locus=scaffold101548_2:1:531:-[Lack 3'-end]"                                                                                                                                                                      |
| "rumen7049_GL1497820_1 [gene] locus=scaffold493989_1:4930:5994:-[Lack 5'-end]"                                                                                                                                                                  |
| "rumen7049_GL1500999_1 [gene] locus=scaffold62117_3:195:1394:+[Complete]"                                                                                                                                                                       |
| "rumen7049_GL1521773_1 [gene] locus=scaffold1170887_1:622:999:-[Lack 5'-end]"                                                                                                                                                                   |
| "rumen7049_GL1574378_1 [gene] locus=C53010378_1:1:696:-[Lack 3'-end]"                                                                                                                                                                           |
| "rumen7049_GL1590078_1 [gene] locus=scaffold908729_3:3:488:-[Lack 3'-end]"                                                                                                                                                                      |
| "rumen7049_GL1679621_1 [gene] locus=scaffold2270630_1:1549:1947:+[Lack 3'-end]"                                                                                                                                                                 |
| "rumen7049_GL1693159_1 [gene] locus=scaffold1907593_1:1:648:+[Lack both ends]"                                                                                                                                                                  |
| "rumen7049_GL1716120_1 [gene] locus=scaffold941244_5:3:635:-[Lack both ends]"                                                                                                                                                                   |
| "rumen7049_GL1762123_1 [gene] locus=scaffold1969850_1:1:864:+[Lack 5'-end]"                                                                                                                                                                     |
| "rumen7049_GL1787872_1 [gene] locus=scaffold1367840_2:675:1865:-[Lack 5'-end]"                                                                                                                                                                  |
| "rumen7049_GL1899143_1 [gene] locus=scaffold1590_1:3:848:-[Lack 3'-end]"                                                                                                                                                                        |
| "rumen7049_GL2019771_1 [gene] locus=scaffold1894819_1:1:564:+[Lack both ends]"                                                                                                                                                                  |
| "rumen7049_GL2123004_1 [gene] locus=scaffold738795_1:3:551:-[Lack 3'-end]"                                                                                                                                                                      |
| "rumen7049_GL2128689_1 [gene] locus=C51355634_1:3:533:+[Lack both ends]"                                                                                                                                                                        |
| "rumen7049_GL2182956_1 [gene] locus=scaffold289278_3:2:595:+[Lack both ends]"                                                                                                                                                                   |
| "rumen7049_GL2213947_1 [gene] locus=scaffold752687_1:1:1125:+[Lack 5'-end]"                                                                                                                                                                     |

|                                                                                 |
|---------------------------------------------------------------------------------|
| ["rumen7049_GL2255690_1 [gene] locus=scaffold794849_1:1:558:+[Lack both ends]"] |
| ["rumen7049_GL2506635_1 [gene] locus=scaffold2227300_1:3:932:-[Lack 3'-end]"]   |
| ["rumen7049_GL2742621_1 [gene] locus=scaffold355448_2:3:719:-[Lack both ends]"] |
| ["rumen7049_GL2804323_1 [gene] locus=scaffold872623_1:760:1713:+[Lack 3'-end]"] |

## C2

|                                                                                                                                                                                                                                                                                                                                                                                                                                                                                                                                                                                                                                                                                                                                                                                                                                                                                                                                                                                                                                                                                                                                                                                                                                                                                                                                                                                                                                                                                                                                                                                 |
|---------------------------------------------------------------------------------------------------------------------------------------------------------------------------------------------------------------------------------------------------------------------------------------------------------------------------------------------------------------------------------------------------------------------------------------------------------------------------------------------------------------------------------------------------------------------------------------------------------------------------------------------------------------------------------------------------------------------------------------------------------------------------------------------------------------------------------------------------------------------------------------------------------------------------------------------------------------------------------------------------------------------------------------------------------------------------------------------------------------------------------------------------------------------------------------------------------------------------------------------------------------------------------------------------------------------------------------------------------------------------------------------------------------------------------------------------------------------------------------------------------------------------------------------------------------------------------|
| <p>["Ncazy AOC96454.1 Beta-1", "4-mannooligosaccharide phosphorylase [Flavobacterium anhuiense]",</p> <p>"cazy APA00252.1 glycosidase [Flavobacterium commune]",</p> <p>"cazy APY11541.1 glycosidase [Seonamhaeicola sp. S2-3]",</p> <p>"cazy ASO06391.1 1", "4-beta-mannosyl-N-acetylglucosamine phosphorylase [Arenibacter algicola]",</p> <p>"cazy AUC86603.1 glycosidase [Polaribacter sp. ALD11]",</p> <p>"cazy AWK06410.1 glycosidase [Flavobacterium sp. HYN0056]",</p> <p>"cazy AXB58136.1 glycosidase [Flavobacterium sp. HYN0086]",</p> <p>"cazy AXP81458.1 Beta-1-2C4-mannooligosaccharide phosphorylase [Mariniflexile sp. TRM1-10]",</p> <p>"cazy SNV15478.1 Domain of uncharacterised function (DUF377) [Capnocytophaga haemolytica]",</p> <p>"mouseMH-6-5_GL0077448 [gene] locus=scaffold46635_4:2:967:+ [Lack 5'-end] codon-table.11",</p> <p>"pigPIG-035_GL0077892 [gene] locus=scaffold14328_3:1498:2463:+ [Complete] codon-table.11",</p> <p>"pigPIG-108_GL0039825 [gene] locus=scaffold57191_1:13352:14317:+ [Complete] codon-table.11",</p> <p>"pigBMZ-3B_GL0032359 [gene] locus=scaffold6698_1:4687:5652:- [Complete] codon-table.11",</p> <p>"cazy 987450434 gb AMD85874.1  glycosidase [Capnocytophaga haemolytica]",</p> <p>"cazy 1042791627 gb ANQ52194.1  Glycosidase", "PH1107-related protein [Flammeovirga sp. MY04]",</p> <p>"cazy 146299793 ref ABQ05065.1 protein of unknown function [Flavobacterium johnsoniae UW101]",</p> <p>"cazy 295136005 ref YP_003586681.1  glycosidase", "PH1107-related protein [Zunongwangia profunda SM-A87]"</p> |
| <p>["Ncazy AOE12712.1 glycoside hydrolase family GH130 [uncultured bacterium]",</p> <p>"humangutV1.CD49-0_GL0178648 [gene] locus=C1383269_1:2:985:+ [Lack 5'-end] codon-table.11",</p> <p>"mouse7-1_GL0006877 [gene] locus=scaffold28884_1:13416:14399:+ [Complete] codon-table.11"]</p>                                                                                                                                                                                                                                                                                                                                                                                                                                                                                                                                                                                                                                                                                                                                                                                                                                                                                                                                                                                                                                                                                                                                                                                                                                                                                        |
| <p>["cazy CCg 29338339 gb AAO76140.1 β-1", "4-mannosyl-N-acetyl-glucosamine phosphorylase_Glycosidase",</p> <p>"PH117-related [Bacteroides thetaiotaomicron VPI-5482]",</p> <p>"cazy AQW92214.1 glycosidase [Elizabethkingia anophelis]",</p> <p>"cazy AQW95541.1 glycosidase [Elizabethkingia anophelis]",</p> <p>"cazy AQW99395.1 glycosidase [Elizabethkingia anophelis]",</p> <p>"cazy AQX03135.1 glycosidase [Elizabethkingia anophelis]",</p> <p>"cazy AQX05903.1 glycosidase [Elizabethkingia meningoseptica]",</p> <p>"cazy AQX07161.1 glycosidase [Elizabethkingia ursingii]",</p> <p>"cazy AQX13441.1 glycosidase [Elizabethkingia meningoseptica]",</p> <p>"cazy AQX47946.1 glycosidase [Elizabethkingia meningoseptica]",</p> <p>"cazy AQX51719.1 glycosidase [Elizabethkingia anophelis]",</p> <p>"cazy AQX84796.1 glycosidase [Elizabethkingia bruuniana]",</p> <p>"cazy AQX89941.1 glycosidase [Elizabethkingia anophelis]",</p> <p>"cazy ASF42136.1 glycosidase [Capnocytophaga sp. ChDC OS43]",</p> <p>"cazy ASM66972.1 glycosidase [Bacteroides caccae]",</p> <p>"cazy ASV79260.1 glycosidase [Elizabethkingia anophelis]",</p> <p>"cazy ATA1779.1 glycosidase [Capnocytophaga sputigena]",</p> <p>"cazy ATA73462.1 glycosidase [Capnocytophaga sp. H4358]"</p>                                                                                                                                                                                                                                                                                               |



"cazy|ATA75602.1 glycosidase [Capnocytophaga sp. H2931]",

"cazy|ATA79533.1 glycosidase [Capnocytophaga sputigena]",

"cazy|ATA81942.1 glycosidase [Capnocytophaga leadbetteri]",

"cazy|ATA84218.1 glycosidase [Capnocytophaga sputigena]",

"cazy|ATC35103.1 glycosidase [Elizabethkingia anophelis R26]",

"cazy|ATC38743.1 glycosidase [Elizabethkingia anophelis Ag1]",

"cazy|ATC42423.1 glycosidase [Elizabethkingia anophelis]",

"cazy|ATC46099.1 glycosidase [Elizabethkingia anophelis]",

"cazy|ATL42797.1 glycosidase [Elizabethkingia miricola]",

"cazy|AVF48974.1 glycosidase [Elizabethkingia anophelis]",

"cazy|AVF52970.1 glycosidase [Elizabethkingia anophelis]",

"cazy|AVM50848.1 glycosidase [Capnocytophaga sp. oral taxon 878]",

"cazy|AVM52247.1 glycosidase [Bacteroides zoogloeiformans]",

"cazy|AVM55807.1 glycosidase [Capnocytophaga sp. oral taxon 864]",

"cazy|AVM57240.1 glycosidase [Bacteroides heparinolyticus]",

"cazy|AXT60144.1 glycosidase [Aquimarina sp. AD10]",

"cazy|BAX82697.1 glycosidase [Marinifilaceae bacterium SPP2]",

"cazy|SQG05129.1 Domain of uncharacterised function (DUF377) [Elizabethkingia meningoseptica]",

"humangutMH0057\_GL0025508 [gene] locus=scaffold20903\_2:8407:9375:+ [Complete] codon-table.11",

"humangutMH0094\_GL0075083 [gene] locus=scaffold20371\_4:10147:11115:- [Complete] codon-table.11",

"humangutMH0180\_GL0060341 [gene] locus=scaffold40469\_3:2382:3350:- [Complete] codon-table.11",

"humangutMH0192\_GL0125589 [gene] locus=scaffold34340\_4:2230:3198:+ [Complete] codon-table.11",

"humangutMH0195\_GL0063025 [gene] locus=scaffold81533\_1:535:1503:- [Complete] codon-table.11",

"humangutMH0265\_GL0056765 [gene] locus=scaffold21250\_3:6389:7357:- [Complete] codon-table.11",

"humangutMH0267\_GL0071113 [gene] locus=scaffold55979\_12:1266:2234:+ [Complete] codon-table.11",

"humangutV1\_CD38-0\_GL0037456 [gene] locus=scaffold62129\_1:8666:9634:+ [Complete] codon-table.11",

"humangutNOF010\_GL0024541 [gene] locus=scaffold35262\_1:25950:26918:- [Complete] codon-table.11",

"humangut667015.Bacsa\_0833 [Complete]:- codon-table.11",

"mouseS-Fe11\_GL0049040 [gene] locus=scaffold17840\_1:11592:12560:+ [Complete] codon-table.11",

"mouseMC-0-3\_GL0054853 [gene] locus=scaffold40460\_5:1928:2896:+ [Complete] codon-table.11",

"mouseMH-6-2\_GL0126099 [gene] locus=C1058985\_1:441:1409:+ [Complete] codon-table.11",

"mouse1A-dyr2-07\_GL0039762 [gene] locus=scaffold31161\_8:3072:4040:- [Complete] codon-table.11",

"mouse1A-dyr3-06\_GL0049008 [gene] locus=scaffold27804\_1:49829:50797:- [Complete] codon-table.11",

"pigPIG-012\_GL0107830 [gene] locus=scaffold39655\_5:3:971:+ [Lack 5'-end] codon-table.11",

"cazy|937962574|gb|ALJ04189.1| glycosidase [Algibacter alginolytica]",

"cazy|938481019|gb|ALJ45250.1| Beta-1",

"4-mannooligosaccharide phosphorylase [Bacteroides ovatus]",

"cazy|324317535|gb|ADY35426.1| glycosidase related protein [Bacteroides salanitronis DSM 18170]",

"cazy|1045272850|gb|ANU57541.1| glycosidase [Bacteroides sp. I48]",

"cazy|938477956|gb|ALJ42188.1| Beta-1", "4-mannooligosaccharide phosphorylase [Bacteroides thetaiotaomicron]",

"cazy|925194212|gb|ALC97496.1| glycosidase [Capnocytophaga sp. oral taxon 323]",

"cazy|1016605761|gb|AMX50831.1| glycosidase [Elizabethkingia anophelis]",

"cazy|1008914301|gb|AMR40735.1| glycosidase [Elizabethkingia anophelis]",

"cazy|1016609433|gb|AMX54223.1| glycosidase [Elizabethkingia anophelis]",

|                                                                                                                                                                                                                                                                                                                                                                                                                                                                                                                                                                                                                                                                                                                                                                                                                                                                                                                                                                                                                                                                                                                                                                                                                                                                                                                                                                                                                                                                                                                                                                                                                                                                                                              |
|--------------------------------------------------------------------------------------------------------------------------------------------------------------------------------------------------------------------------------------------------------------------------------------------------------------------------------------------------------------------------------------------------------------------------------------------------------------------------------------------------------------------------------------------------------------------------------------------------------------------------------------------------------------------------------------------------------------------------------------------------------------------------------------------------------------------------------------------------------------------------------------------------------------------------------------------------------------------------------------------------------------------------------------------------------------------------------------------------------------------------------------------------------------------------------------------------------------------------------------------------------------------------------------------------------------------------------------------------------------------------------------------------------------------------------------------------------------------------------------------------------------------------------------------------------------------------------------------------------------------------------------------------------------------------------------------------------------|
| <p>"cazygi 1016602074 gb AMX47371.1  glycosidase [Elizabethkingia anophelis]",</p> <p>"cazygi 822827313 gb AKH94537.1  glycosidase [Elizabethkingia anophelis FMS-007]",</p> <p>"cazygi 675104695 gb AIL45988.1  putative glycoside hydrolase [Elizabethkingia anophelis NUHP1]",</p> <p>"cazygi 769869730 gb AJW61972.1  Beta-1", "4-mannooligosaccharide phosphorylase [Elizabethkingia miricola"]</p>                                                                                                                                                                                                                                                                                                                                                                                                                                                                                                                                                                                                                                                                                                                                                                                                                                                                                                                                                                                                                                                                                                                                                                                                                                                                                                     |
| <p><b>["cazyCCgi 315447097 gb ADU20661.1 β-1", "4-mannooligosaccharide phosphorylase_glycosidase related protein [Ruminococcus albus 7 = DSM 20455]",</b></p> <p>"humangutMH0031_GL0006535 [gene] locus=scaffold3940_2:1147:2154:+ [Complete] codon-table.11",</p> <p>"humangutMH0150_GL0052407 [gene] locus=scaffold31033_23:1372:2379:- [Complete] codon-table.11",</p> <p>"humangutMH0181_GL0015422 [gene] locus=scaffold27717_21:1:1008:+ [Lack 5'-end] codon-table.11",</p> <p>"humangutMH0309_GL0012678 [gene] locus=scaffold72956_5:115:1122:+ [Complete] codon-table.11",</p> <p>"humangutMH0454_GL0213341 [gene] locus=scaffold65847_2:10038:11045:- [Complete] codon-table.11",</p> <p>"humangutV1_UC28-0_GL0123124 [gene] locus=scaffold14894_6:2515:3522:- [Complete] codon-table.11",</p> <p>"pigPIG-035_GL0150811 [gene] locus=scaffold77973_1:143:1150:- [Complete] codon-table.11",</p> <p>"pigDB-510B_GL0109450 [gene] locus=scaffold4200_5:4485:5492:+ [Complete] codon-table.11",</p> <p>"rumen554_GL2190451_1 [gene] locus=scaffold172783_2:11618:12625:-[Complete]",</p> <p>"rumen555_GL2013701_1 [gene] locus=scaffold871485_2:30014:31021:-[Complete]",</p> <p>"rumen0081_GL0613719_1 [gene] locus=scaffold142497_1:5484:6491:+[Complete]"</p>                                                                                                                                                                                                                                                                                                                                                                                                                                        |
| <p><b>["cazyCCgi 651373346 ref WP_026486574.1 β-1", "4-mannooligosaccharide phosphorylase_glycosidase [Caldanaerobius polysaccharolyticus]",</b></p> <p>"cazy SYX87324.1 Beta-1", "4-mannooligosaccharide phosphorylase [Paenibacillus alvei]",</p> <p>"humangutSZEY-10A_GL0075713 [gene] locus=scaffold7737_2:779:1768:- [Complete] codon-table.11",</p> <p>"pigPIG-025_GL0011031 [gene] locus=scaffold97882_7:54798:55787:- [Complete] codon-table.11",</p> <p>"pigBMZ-2B_GL0067583 [gene] locus=scaffold34040_5:693:1682:- [Complete] codon-table.11"]</p>                                                                                                                                                                                                                                                                                                                                                                                                                                                                                                                                                                                                                                                                                                                                                                                                                                                                                                                                                                                                                                                                                                                                                |
| <p><b>["cazyCCgi 651374303 ref WP_026486530.1 β-1", "4-mannooligosaccharide phosphorylase_glycosidase [Caldanaerobius polysaccharolyticus]",</b></p> <p><b>"cazyCCgi 290769685 gb ADD61463.1 β-1", "4-mannopyranosyl-chitobiose phosphorylase_putative protein [uncultured organism]",</b></p> <p>"humangutMH0262_GL0010724 [gene] locus=scaffold78173_1:3824:4807:+ [Complete] codon-table.11",</p> <p>"humangutMH0409_GL0042854 [gene] locus=scaffold25953_9:34462:35445:+ [Complete] codon-table.11",</p> <p>"rumen0081_GL0258022_1 [gene] locus=scaffold711522_2:1072:2055:+[Complete]",</p> <p>"rumen0081_GL2439589_1 [gene] locus=scaffold395692_2:368:1351:-[Complete]"</p>                                                                                                                                                                                                                                                                                                                                                                                                                                                                                                                                                                                                                                                                                                                                                                                                                                                                                                                                                                                                                           |
| <p><b>["cazyCCgi VCV21229.1 Beta-1", "4-mannooligosaccharide phosphorylase [Roseburia intestinalis L1-82]",</b></p> <p>"cazy AOZ96975.1 glycoside hydrolase GH130 family [Butyrivibrio hungatei]",</p> <p>"cazy ASU28438.1 glycosylase [Blautia coccooides]",</p> <p>"cazy AVM41763.1 glycosylase [Fastidiosipila sanguinis]",</p> <p>"humangutMH0001_GL0012726 [gene] locus=scaffold3748_3:819:1841:- [Complete] codon-table.11",</p> <p>"humangutMH0006_GL0069640 [gene] locus=scaffold5771_4:3021:4043:+ [Complete] codon-table.11",</p> <p>"humangutMH0014_GL0030038 [gene] locus=scaffold35967_1:870:1892:- [Complete] codon-table.11",</p> <p>"humangutMH0016_GL0060919 [gene] locus=scaffold9428_5:8292:9314:+ [Complete] codon-table.11",</p> <p>"humangutMH0100_GL0160312 [gene] locus=scaffold5389_46:50:1072:- [Complete] codon-table.11",</p> <p>"humangutMH0113_GL0020570 [gene] locus=scaffold17102_3:3989:5011:- [Complete] codon-table.11",</p> <p>"humangutMH0161_GL0096554 [gene] locus=scaffold96080_1:27178:28200:+ [Complete] codon-table.11",</p> <p>"humangutMH0200_GL0131567 [gene] locus=scaffold17224_1:5843:6865:- [Complete] codon-table.11",</p> <p>"humangutMH0206_GL0049502 [gene] locus=scaffold17212_7:15:1037:- [Complete] codon-table.11",</p> <p>"humangutMH0260_GL0146482 [gene] locus=scaffold13264_11:14013:15035:+ [Complete] codon-table.11",</p> <p>"humangutMH0355_GL0026988 [gene] locus=scaffold59455_8:4866:5888:- [Complete] codon-table.11",</p> <p>"humangutMH0385_GL0153945 [gene] locus=scaffold37197_11:1272:2294:- [Complete] codon-table.11",</p> <p>"humangutMH0457_GL0198107 [gene] locus=scaffold43943_6:397:1419:+ [Complete] codon-table.11",</p> |

"humangutN006A\_GL0085957 [gene] locus=scaffold41619\_8:1261:2283:- [Complete] codon-table.11",

"humangutSZEY-79A\_GL0037345 [gene] locus=scaffold32900\_1:485:1507:- [Complete] codon-table.11",

"mouseS-Fe2\_GL0205548 [gene] locus=scaffold57199\_1:713:1735:+ [Complete] codon-table.11",

"mouseS-Fe2\_GL0160681 [gene] locus=scaffold84515\_1:47520:48542:+ [Complete] codon-table.11",

"mouseS-Fe8\_GL0202731 [gene] locus=scaffold84136\_4:27806:28828:+ [Complete] codon-table.11",

"mouseMC-6-1\_GL0102368 [gene] locus=scaffold72393\_2:2860:3882:+ [Complete] codon-table.11",

"mouseG1-6A\_GL0054348 [gene] locus=scaffold28780\_5:666:1688:- [Complete] codon-table.11",

"mouseGroup2-2A\_GL0001769 [gene] locus=scaffold194\_1:17837:18859:+ [Complete] codon-table.11",

"mouseGroup2-3A\_GL0134533 [gene] locus=scaffold80199\_2:5686:6708:- [Complete] codon-table.11",

"mouseGroup2-8A\_GL0147180 [gene] locus=scaffold121907\_8:187:1209:- [Complete] codon-table.11",

"mouse1-2\_GL0016004 [gene] locus=scaffold39337\_1:2456:3478:- [Complete] codon-table.11",

"mouse1-5\_GL0036818 [gene] locus=scaffold26302\_1:432:1454:+ [Complete] codon-table.11",

"mouse2-2\_GL0045689 [gene] locus=scaffold54323\_1:17172:18194:+ [Complete] codon-table.11",

"mouse2-2\_GL0076416 [gene] locus=scaffold14974\_4:38683:39705:+ [Complete] codon-table.11",

"mouse2-8\_GL0082818 [gene] locus=scaffold10824\_2:7864:8886:- [Complete] codon-table.11",

"mouse29\_GL0004046 [gene] locus=scaffold98111\_2:4515:5537:- [Complete] codon-table.11",

"mouse35\_GL0008205 [gene] locus=scaffold1654\_3:3:1025:+ [Lack 5'-end] codon-table.11",

"mouse3-6\_GL0009577 [gene] locus=scaffold63212\_1:5348:6370:- [Complete] codon-table.11",

"mouse4-8\_GL00099500 [gene] locus=scaffold61328\_1:16433:17455:+ [Complete] codon-table.11",

"mouse5-1\_GL0032036 [gene] locus=scaffold24858\_2:6076:7098:- [Complete] codon-table.11",

"mouse54\_GL0098345 [gene] locus=scaffold38839\_3:2141:3163:+ [Complete] codon-table.11",

"mouse6-1\_GL0086336 [gene] locus=scaffold3735\_1:19621:20643:+ [Complete] codon-table.11",

"mouse6-2\_GL0056583 [gene] locus=scaffold27523\_9:5660:6682:- [Complete] codon-table.11",

"mouse6-7\_GL0056546 [gene] locus=scaffold18483\_2:3407:4429:+ [Complete] codon-table.11",

"pigPIG\_111\_GL0242587 [gene] locus=scaffold89853\_4:107:1129:- [Complete] codon-table.11",

"pigPIG\_144\_GL0102691 [gene] locus=scaffold2700\_5:26267:27289:- [Complete] codon-table.11",

"pigPIG\_154\_GL0044208 [gene] locus=scaffold38224\_2:2109:3131:+ [Complete] codon-table.11",

"pigPIG\_200\_GL0062716 [gene] locus=scaffold108665\_2:246:1268:+ [Complete] codon-table.11",

"pigPIG\_203\_GL0064463 [gene] locus=scaffold62405\_17:956:1978:- [Complete] codon-table.11",

"pigPIG-001\_GL0136661 [gene] locus=scaffold53466\_8:426:1448:- [Complete] codon-table.11",

"pigPIG-001\_GL0159825 [gene] locus=scaffold36090\_4:86:1108:- [Complete] codon-table.11",

"pigPIG-017\_GL0131674 [gene] locus=scaffold766\_5:2554:3576:+ [Complete] codon-table.11",

"pigPIG-017\_GL0236531 [gene] locus=scaffold70193\_4:1219:2241:- [Complete] codon-table.11",

"pigPIG-022\_GL0089756 [gene] locus=scaffold1106\_5:6704:7726:- [Complete] codon-table.11",

"pigPIG-023\_GL0120565 [gene] locus=scaffold148282\_1:76406:77428:+ [Complete] codon-table.11",

"pigPIG-033\_GL0092555 [gene] locus=scaffold78260\_5:2658:3680:- [Complete] codon-table.11",

"pigPIG-033\_GL0102692 [gene] locus=scaffold73245\_1:1720:2742:- [Complete] codon-table.11",

"pigPIG-044\_GL0139261 [gene] locus=scaffold51992\_17:1438:2460:- [Complete] codon-table.11",

"pigPIG-062\_GL0130920 [gene] locus=scaffold91288\_2:9032:10054:+ [Complete] codon-table.11",

"pigPIG-101\_GL0023440 [gene] locus=scaffold56096\_1:2464:3486:- [Complete] codon-table.11",

"pigPIG-106\_GL0046631 [gene] locus=scaffold17851\_9:6645:7667:- [Complete] codon-table.11",

"pigBHZ-10B\_GL0009433 [gene] locus=scaffold124559\_4:1863:2885:- [Complete] codon-table.11",

"pigDB-537B\_GL0144100 [gene] locus=scaffold128039\_1:995:2017:- [Complete] codon-table.11",

"pigZXZ-4B\_GL0116412 [gene] locus=scaffold118720\_2:639:1661:+ [Complete] codon-table.11",

|                                                                                                                            |
|----------------------------------------------------------------------------------------------------------------------------|
| "rumen553_GL0055107_1 [gene] locus=scaffold382495_2:1147:2169:-[Complete]",                                                |
| "rumen553_GL0598340_1 [gene] locus=scaffold368919_2:79:1101:-[Complete]",                                                  |
| "rumen553_GL0620791_1 [gene] locus=scaffold430590_1:63846:64868:+[Complete]",                                              |
| "rumen553_GL0811323_1 [gene] locus=scaffold250358_2:5650:6672:-[Complete]",                                                |
| "rumen552_GL0864442_1 [gene] locus=scaffold148924_1:2:1024:-[Complete]",                                                   |
| "rumen552_GL1341759_1 [gene] locus=scaffold137436_3:150:1172:-[Complete]",                                                 |
| "rumen583_GL0067054_1 [gene] locus=scaffold295777_3:45:1067:-[Complete]",                                                  |
| "rumen583_GL0091770_1 [gene] locus=scaffold324703_1:59880:60902:+[Complete]",                                              |
| "rumen583_GL0159580_1 [gene] locus=scaffold172591_7:10669:11691:-[Complete]",                                              |
| "rumen583_GL0325327_1 [gene] locus=scaffold76910_2:7448:8470:-[Complete]",                                                 |
| "rumen583_GL0385135_1 [gene] locus=scaffold19862_2:43:1065:-[Complete]",                                                   |
| "rumen554_GL1823485_1 [gene] locus=scaffold1579573_1:191:1213:-[Complete]",                                                |
| "rumen554_GL2137295_1 [gene] locus=scaffold640047_1:47573:48595:+[Complete]",                                              |
| "rumen0081_GL1932850_1 [gene] locus=scaffold808879_5:5307:6329:-[Complete]",                                               |
| "rumen100058_GL0302441_1 [gene] locus=scaffold915010_2:1165:2187:-[Complete]",                                             |
| "rumen100058_GL0492646_1 [gene] locus=scaffold317403_3:2586:3608:-[Complete]",                                             |
| "rumen100058_GL2403505_1 [gene] locus=scaffold276030_2:11:1033:-[Complete]",                                               |
| "rumen2009040_GL3471506_1 [gene] locus=scaffold135228_1:761:1783:-[Complete]",                                             |
| "cazygi 1045290885 gb ANU75635.1  glycosylase [Blautia sp. YL58]",                                                         |
| "cazygi 326543194 gb ADZ85053.1  glycosidase related protein [Clostridium lentocellum DSM 5427]",                          |
| "cazygi 326543232 gb ADZ85091.1  glycosidase related protein [Clostridium lentocellum DSM 5427]",                          |
| "cazygi 160429064 gb ABX42627.1  glycosidase PH1107-related [Lachnoclostridium phytofermentans ISDg]",                     |
| "cazygi 345502713 gb AEN97396.1  glycosidase related protein [Roseburia hominis A2-183]",                                  |
| "cazygi 291537318 emb CBL10430.1  Predicted glycosylase [Roseburia intestinalis M50/1]",                                   |
| "cazygi 291539264 emb CBL12375.1  Predicted glycosylase [Roseburia intestinalis XB6B4]",                                   |
| "cazygi 663097292 gb AIF25950.1  putative glycosidase related protein [uncultured bacterium Ad_091_F22_contig1]",          |
| "cazygi 663097607 gb AIF26243.1  putative glycosidase related protein [uncultured bacterium Lq_007_G03]"                   |
| ["cazygi 1003108889 gb AMO13191.1  glycoside hydrolase [uncultured bacterium]"]                                            |
| ["cazygi 1015666995 gb AMW33356.1  glycosidase [Fervidobacterium islandicum]"]                                             |
| ["cazygi 1027790250 emb CUS05925.1  Beta-1", "4-mannooligosaccharide phosphorylase [Ardenticatena]"]                       |
| ["cazygi 1033477965 dbj BAV13072.1  glycosidase PH1107-related [Clostridium cellulovorans]"]                               |
| ["cazygi 1049076866 gb ANX01044.1  glycosylase [[Clostridium] stercorarium subsp. leptospartum DSM 9219]",                 |
| "cazygi 472398958 gb AGI39157.1  mannosylglucose phosphorylase [[Clostridium] stercorarium subsp. stercorarium DSM 8532]", |
| "cazygi 1049074312 gb ANW98510.1  glycosylase [[Clostridium] stercorarium subsp. thermolacticum DSM 2910]"                 |
| ["cazygi 160428527 gb ABX42090.1  glycosidase PH1107-related [Lachnoclostridium phytofermentans ISDg]"]                    |
| ["cazygi 217337279 gb ACK43072.1  glycosidase PH1107-related [Dictyoglomus turgidum DSM 6724]"                             |
| ["cazygi 220000694 gb ACL77295.1  glycosidase PH1107-related [[Clostridium] cellulolyticum H10]",                          |
| "cazygi 373946951 gb AEY67872.1  putative glycosylase [Clostridium sp. BNL1100]"                                           |
| ["cazygi 221572710 gb ACM23522.1  Glycosidase [Thermotoga neapolitana DSM 4359]",                                          |
| "cazygi 752580911 gb AJG41424.1  glycosylase [Thermotoga sp. RQ7]"                                                         |
| ["cazygi 222457361 gb ACM61623.1  glycosidase PH1107-related [Caldicellulosiruptor bescii DSM 6725]",                      |
| "cazygi 311776547 gb ADQ06033.1  glycosidase related protein [Caldicellulosiruptor hydrothermalis 108]",                   |
| "cazygi 312181485 gb ADQ41655.1  glycosidase related protein [Caldicellulosiruptor kristjanssonii 177R1B]",                |
| "cazygi 312201880 gb ADQ45207.1  glycosidase related protein [Caldicellulosiruptor kronotskyensis 2002]",                  |

|                                                                                                                                                                                                                                                                                                                                                                                                                                                                                                                                                                                                                                                                                                                                                                                                                                                                                                                                                                |
|----------------------------------------------------------------------------------------------------------------------------------------------------------------------------------------------------------------------------------------------------------------------------------------------------------------------------------------------------------------------------------------------------------------------------------------------------------------------------------------------------------------------------------------------------------------------------------------------------------------------------------------------------------------------------------------------------------------------------------------------------------------------------------------------------------------------------------------------------------------------------------------------------------------------------------------------------------------|
| "cazygi 343963799 gb AEM72946.1  glycosidase related protein [Caldicellulosiruptor lactoaceticus 6A]",<br>"cazygi 302575635 gb ADL43426.1  glycosidase related protein [Caldicellulosiruptor obsidiansis OB47]",<br>"cazygi 145408938 gb ABP65942.1  glycosidase", " PH1107-related protein [Caldicellulosiruptor saccharolyticus DSM 8903]"                                                                                                                                                                                                                                                                                                                                                                                                                                                                                                                                                                                                                   |
| ["cazygi 256581110 gb ACU92245.1  glycosidase PH1107-related [Capnocytophaga ochracea DSM 7271]"                                                                                                                                                                                                                                                                                                                                                                                                                                                                                                                                                                                                                                                                                                                                                                                                                                                               |
| ["cazygi 290770046 gb ADD61810.1  putative protein [uncultured organism]",<br>"rumen553_GL0441395_1 [gene] locus=scaffold84340_2:101227:102339:+[Complete]",<br>"cazygi 291541075 emb CBL14186.1  Predicted glycosylase [Roseburia intestinalis XB6B4]"                                                                                                                                                                                                                                                                                                                                                                                                                                                                                                                                                                                                                                                                                                        |
| ["cazygi 302578870 gb ADL52882.1  glycosidase related protein [Clostridium cellulovorans 743B]"                                                                                                                                                                                                                                                                                                                                                                                                                                                                                                                                                                                                                                                                                                                                                                                                                                                                |
| ["cazygi 306531529 gb ADN01063.1  putative glycosylase [Spirochaeta thermophila DSM 6192]"                                                                                                                                                                                                                                                                                                                                                                                                                                                                                                                                                                                                                                                                                                                                                                                                                                                                     |
| ["cazygi 315473032 gb ADU29635.1  glycosidase related protein [Bacillus cellulosilyticus DSM 2522]",<br>"cazygi 1000297352 gb AML27054.1  putative glycosidase [Bacillus sp. N16-5]"                                                                                                                                                                                                                                                                                                                                                                                                                                                                                                                                                                                                                                                                                                                                                                           |
| ["cazygi 332181648 gb AEE17336.1  glycosidase related protein [Treponema brennaborense DSM 12168]"                                                                                                                                                                                                                                                                                                                                                                                                                                                                                                                                                                                                                                                                                                                                                                                                                                                             |
| ["cazygi 332699916 gb AEE96857.1  glycosidase related protein [Mahella australiensis 50-1 BON]"                                                                                                                                                                                                                                                                                                                                                                                                                                                                                                                                                                                                                                                                                                                                                                                                                                                                |
| ["cazygi 339410796 gb AEJ60361.1  glycosidase related protein [Spirochaeta thermophila DSM 6578]"                                                                                                                                                                                                                                                                                                                                                                                                                                                                                                                                                                                                                                                                                                                                                                                                                                                              |
| ["cazygi 339903322 gb AEK24401.1  Hypothetical protein Ccan_22860 [Capnocytophaga canimorsus Cc5]"                                                                                                                                                                                                                                                                                                                                                                                                                                                                                                                                                                                                                                                                                                                                                                                                                                                             |
| ["cazygi 374843357 emb CCF12061.1  hypothetical protein [Paenibacillus sp. Q8]"                                                                                                                                                                                                                                                                                                                                                                                                                                                                                                                                                                                                                                                                                                                                                                                                                                                                                |
| ["cazygi 383110288 gb AFG35891.1  putative glycosylase [Fervidobacterium pennivorans DSM 9078]",<br>"cazygi 1028458698 gb ANE41631.1  glycosidase [Fervidobacterium pennivorans]",<br>"cazygi 217036715 gb ACJ75237.1  conserved hypothetical protein [Thermosiphon africanus TCF52B]"                                                                                                                                                                                                                                                                                                                                                                                                                                                                                                                                                                                                                                                                         |
| ["cazygi 395812581 gb AFN75330.1  glycosidase PH1107-related protein [Melioribacter roseus P3M-2]"                                                                                                                                                                                                                                                                                                                                                                                                                                                                                                                                                                                                                                                                                                                                                                                                                                                             |
| ["cazygi 407728372 dbj BAM48370.1  hypothetical protein AXY_22380 [Amphibacillus xylanus NBRC 15112]",<br>"cazygi 686549368 gb AIQ60064.1  glycosylase [Paenibacillus borealis]",<br>"cazygi 686557139 gb AIQ67833.1  glycosylase [Paenibacillus graminis]",<br>"cazygi 806911815 emb CQR54423.1  Beta-1", "4-mannooligosaccharide phosphorylase [Paenibacillus riograndensis SBR5]",<br>"cazygi 686520597 gb AIQ31298.1  glycosylase [Paenibacillus sp. FSL P4-0081]"                                                                                                                                                                                                                                                                                                                                                                                                                                                                                         |
| ["cazygi 430024079 gb AGA35561.1  glycoside hydrolase family 43", " partial [Caldanaerobius polysaccharolyticus]"                                                                                                                                                                                                                                                                                                                                                                                                                                                                                                                                                                                                                                                                                                                                                                                                                                              |
| ["cazygi 663097319 gb AIF25974.1  putative glycosidase related protein [uncultured bacterium Ad_095_K16_contig2]"                                                                                                                                                                                                                                                                                                                                                                                                                                                                                                                                                                                                                                                                                                                                                                                                                                              |
| ["cazygi 673067760 emb CD225115.1  Beta-1", "4-mannooligosaccharide phosphorylase [[Clostridium] cellulosi]"                                                                                                                                                                                                                                                                                                                                                                                                                                                                                                                                                                                                                                                                                                                                                                                                                                                   |
| ["cazygi 686549812 gb AIQ60508.1  glycosylase [Paenibacillus borealis]"                                                                                                                                                                                                                                                                                                                                                                                                                                                                                                                                                                                                                                                                                                                                                                                                                                                                                        |
| ["cazygi 744796446 gb AJC74022.1  glycosylase [Pseudothromotoga hypogea DSM 11164 = NBRC 106472]",<br>"cazygi 157314894 gb ABV33993.1  glycosidase PH1107-related [Pseudothromotoga lettingae TMO]",<br>"cazygi 4981779 gb AAD36300.1 AE001779_2 conserved hypothetical protein [Thermotoga maritima MSB8]",<br>"cazygi 811642464 gb AKE30873.1  glycosylase [Thermotoga maritima]",<br>"cazygi 811630537 gb AKE27136.1  glycosylase [Thermotoga maritima]",<br>"cazygi 281374081 gb ADA67643.1  glycosidase PH1107-related protein [Thermotoga naphthophila RKU-10]",<br>"cazygi 147736211 gb ABQ47551.1  glycosidase", " PH1107-related [Thermotoga petrophila RKU-1]",<br>"cazygi 728865928 gb AIY87108.1  glycosidase PH1107-related protein [Thermotoga sp. 2812B]",<br>"cazygi 728867658 gb AIY88837.1  glycosidase PH1107-related protein [Thermotoga sp. Cell2]",<br>"cazygi 170176877 gb ACB09929.1  glycosidase PH1107-related [Thermotoga sp. RQ2]" |
| ["cazygi 991824681 gb AMF93030.1  glycosylase [Vibrio fluvialis]",<br>"cazygi 1042390254 gb ANQ24661.1  glycosylase [Vibrio natriegens]"                                                                                                                                                                                                                                                                                                                                                                                                                                                                                                                                                                                                                                                                                                                                                                                                                       |
| ["cazy AOK90367.1 glycosylase [Paenibacillus polymyxa]",<br>"cazy APB69117.1 glycosylase [Paenibacillus polymyxa]",                                                                                                                                                                                                                                                                                                                                                                                                                                                                                                                                                                                                                                                                                                                                                                                                                                            |

|                                                                                                                                                                                                                                                                                                                                                                                                                                                                                                                                                                                                                                                                                                                                                                                                                                                                                                                                                                                                                                                                                                                                                                                                                  |
|------------------------------------------------------------------------------------------------------------------------------------------------------------------------------------------------------------------------------------------------------------------------------------------------------------------------------------------------------------------------------------------------------------------------------------------------------------------------------------------------------------------------------------------------------------------------------------------------------------------------------------------------------------------------------------------------------------------------------------------------------------------------------------------------------------------------------------------------------------------------------------------------------------------------------------------------------------------------------------------------------------------------------------------------------------------------------------------------------------------------------------------------------------------------------------------------------------------|
| <p>"cazy APB73775.1 glycosylase [Paenibacillus polymyxa]",</p> <p>"cazy APQ61721.1 glycosylase [Paenibacillus polymyxa]",</p> <p>"cazy ASR45398.1 glycosylase [Paenibacillus kribbensis]",</p> <p>"cazy AUO06681.1 glycosylase [Paenibacillus sp. lzh-N1]",</p> <p>"cazy AUS29142.1 glycosylase [Paenibacillus polymyxa]",</p> <p>"cazygi 920791914 gb ALA44433.1  glycosylase [Paenibacillus peoriae]",</p> <p>"cazygi 723615828 gb AIY09201.1  glycosylase [Paenibacillus polymyxa]",</p> <p>"cazygi 565677752 gb AHC22322.1  glycosylase [Paenibacillus polymyxa CR1]",</p> <p>"cazygi 305860619 gb ADM72407.1  glycosylase [Paenibacillus polymyxa E681]",</p> <p>"cazygi 392305246 emb CCI71609.1  glycosidase [Paenibacillus polymyxa M1]",</p> <p>"cazygi 748408394 gb AJE51910.1  glycosylase [Paenibacillus polymyxa]",</p> <p>"cazygi 309249531 gb ADO59098.1  glycosylase [Paenibacillus polymyxa SC2]",</p> <p>"cazygi 595636226 gb AHM68484.1  glycosidase like protein [Paenibacillus polymyxa SQR-21]",</p> <p>"cazygi 954043275 gb ALP37040.1  glycosylase [Paenibacillus sp. IHB B 3084]",</p> <p>"cazygi 357200019 gb AET57916.1  glycosidase like protein [Paenibacillus terrae HPL-003]"</p> |
| <p>["cazy AOR95091.1 glycosylase [Clostridium butyricum]",</p> <p>"cazy APF24412.1 hypothetical protein NPD4_1003 [Clostridium butyricum]",</p> <p>"cazy AQR97693.1 beta-1", "4-mannooligosaccharide phosphorylase [Clostridium saccharoperbutylacetonicum]",</p> <p>"cazy AXB83879.1 glycosylase [Clostridium butyricum]",</p> <p>"cazy SNX53913.1 beta-1", "4-mannooligosaccharide/beta-1", "4-mannosyl-N-acetylglucosamine phosphorylase [Thermoanaerobacterium sp. RBITD]",</p> <p>"humangutMH0277_GL0042744 [gene] locus=scaffold19815_1:40231:41247:- [Complete] codon-table.11",</p> <p>"cazygi 961431628 gb ALS17957.1  glycosylase [Clostridium butyricum]",</p> <p>"cazygi 959156843 gb ALP91461.1  glycosylase [Clostridium butyricum]",</p> <p>"cazygi 1028925582 gb ANF15082.1  glycosylase [Clostridium butyricum]",</p> <p>"cazygi 451788055 gb AGF59023.1  putative glycosylase [Clostridium saccharoperbutylacetonicum N1-4(HMT)]",</p> <p>"cazygi 389569314 gb AFK85719.1  glycosidase related protein [Thermoanaerobacterium saccharolyticum JW/SL-YS485]",</p> <p>"cazygi 302777167 gb ADL67726.1  glycosidase-related [Thermoanaerobacterium thermosaccharolyticum DSM 571]"</p>            |
| <p>["cazy AOS43555.1 Beta-1", "4-mannooligosaccharide phosphorylase [Lacunisphaera limnophila]",</p> <p>"cazygi 177841343 gb ACB75595.1  glycosidase PH1107-related [Opitutus terrae PB90-1]"</p>                                                                                                                                                                                                                                                                                                                                                                                                                                                                                                                                                                                                                                                                                                                                                                                                                                                                                                                                                                                                                |
| <p>["cazy AOZ94170.1 glycosylase [Paenibacillus crassostreae]",</p> <p>"cazy ASA19960.1 glycosylase [Paenibacillus donghaensis]",</p> <p>"cazy AWB46380.1 glycosylase [Paenibacillus sp. CAA11]",</p> <p>"cazygi 686546540 gb AIQ57236.1  glycosylase [Paenibacillus borealis]",</p> <p>"cazygi 690615652 gb AIQ16865.1  glycosylase [Paenibacillus sp. FSL H7-0357]",</p> <p>"cazygi 690616322 gb AIQ17535.1  glycosylase [Paenibacillus sp. FSL H7-0357]",</p> <p>"cazygi 686517733 gb AIQ28434.1  glycosylase [Paenibacillus sp. FSL P4-0081]",</p> <p>"cazygi 686536688 gb AIQ47386.1  glycosylase [Paenibacillus sp. FSL R7-0273]",</p> <p>"cazygi 686542219 gb AIQ52916.1  glycosylase [Paenibacillus sp. FSL R7-0331]",</p> <p>"cazygi 686552475 gb AIQ63170.1  glycosylase [Paenibacillus stellifer]"</p>                                                                                                                                                                                                                                                                                                                                                                                                |
| <p>["cazy APC39750.1 glycosylase [Clostridium estertheticum subsp. estertheticum]",</p> <p>"cazygi 82523802 emb CAI78545.1  hypothetical protein [uncultured Chloroflexi bacterium]"</p>                                                                                                                                                                                                                                                                                                                                                                                                                                                                                                                                                                                                                                                                                                                                                                                                                                                                                                                                                                                                                         |
| <p>["cazy APO42885.1 glycosylase [Paenibacillus xylanexedens]"</p>                                                                                                                                                                                                                                                                                                                                                                                                                                                                                                                                                                                                                                                                                                                                                                                                                                                                                                                                                                                                                                                                                                                                               |
| <p>["cazy APS39188.1 glycosidase [Salegentibacter sp. T436]",</p> <p>"cazy ASE18319.1 glycosidase [Prevotella melaninogenica]",</p>                                                                                                                                                                                                                                                                                                                                                                                                                                                                                                                                                                                                                                                                                                                                                                                                                                                                                                                                                                                                                                                                              |

|                                                                                                                                                                                                                                                                                                                                                                                                                                                                                                                                                                                                                                                                                                                                                                                                                                                                                                                                                                                                                                                                                                                                                                                                                                                                                                                                                                                                                                                                                                                                                                                                                                                                                                                                                                                                                |
|----------------------------------------------------------------------------------------------------------------------------------------------------------------------------------------------------------------------------------------------------------------------------------------------------------------------------------------------------------------------------------------------------------------------------------------------------------------------------------------------------------------------------------------------------------------------------------------------------------------------------------------------------------------------------------------------------------------------------------------------------------------------------------------------------------------------------------------------------------------------------------------------------------------------------------------------------------------------------------------------------------------------------------------------------------------------------------------------------------------------------------------------------------------------------------------------------------------------------------------------------------------------------------------------------------------------------------------------------------------------------------------------------------------------------------------------------------------------------------------------------------------------------------------------------------------------------------------------------------------------------------------------------------------------------------------------------------------------------------------------------------------------------------------------------------------|
| <p>"cazy ATA77353.1 glycosidase [Capnocytophaga canimorsus]",</p> <p>"cazy ATA91837.1 glycosidase [Capnocytophaga canimorsus]",</p> <p>"cazy ATA94100.1 glycosidase [Capnocytophaga canimorsus]",</p> <p>"cazy AU156627.1 glycosidase [Prevotella jejuni]",</p> <p>"cazy AWL78816.1 glycosidase [Capnocytophaga canimorsus]",</p> <p>"cazy AXV49873.1 glycosidase [Prevotella denticola]",</p> <p>"cazy BBA29964.1 1","4-beta-mannosyl-N-acetylglucosamine phosphorylase [Prevotella melaninogenica]",</p> <p>"humangutMH0166_GL0018134 [gene] locus=scaffold11391_1:34077:35051:+ [Complete] codon-table.11",</p> <p>"humangut158924089-stool1_revised_scaffold16799_1_gene36849 strand:- start:4086 stop:5060 length:975 start_codon:no stop_codon:yes gene_type:incomplete [Lack 5'-end] codon-table.11",</p> <p>"humangut553171.HMPREF0648_0792 [Complete]:- codon-table.11",</p> <p>"mouseMH-0-3_GL0040838 [gene] locus=scaffold24246_3:1738:2712:- [Complete] codon-table.11",</p> <p>"mouseG1-4A_GL0001880 [gene] locus=scaffold99_2:27529:28503:+ [Complete] codon-table.11",</p> <p>"mouse20_GL0104310 [gene] locus=scaffold95191_23:188:1162:+ [Complete] codon-table.11",</p> <p>"cazy 610422242 gb AHW59446.1  glycosidase [Draconibacterium orientale]",</p> <p>"cazy 326944893 gb AEA20778.1  hypothetical protein HMPREF9137_2294 [Prevotella denticola F0289]",</p> <p>"cazy 913019237 gb AKU70190.1  glycosidase [Prevotella fusca JCM 17724]",</p> <p>"cazy 302150791 gb ADK97052.1  hypothetical protein HMPREF0659_A6441 [Prevotella melaninogenica ATCC 25845]",</p> <p>"cazy 1043184170 gb ANR73902.1  glycosidase [Prevotella scopos JCM 17725]",</p> <p>"cazy 288332494 gb EFC70974.1  hypothetical protein HMPREF0669_00679 (plasmid) [Prevotella sp. oral taxon 299 str. F0039]"</p> |
| <p>"cazy APT73993.1 glycosidase [Thermosipho melanesiensis]",</p> <p>"cazy 217037215 gb ACJ75737.1  unknwon conserved protein [Thermosipho africanus TCF52B]",</p> <p>"cazy 149793426 gb ABR30874.1  glycosidase"," PH1107-related [Thermosipho melanesiensis BI429]"</p>                                                                                                                                                                                                                                                                                                                                                                                                                                                                                                                                                                                                                                                                                                                                                                                                                                                                                                                                                                                                                                                                                                                                                                                                                                                                                                                                                                                                                                                                                                                                      |
| <p>"cazy APT76001.1 glycosidase [Marinitoga sp. 1137]"</p>                                                                                                                                                                                                                                                                                                                                                                                                                                                                                                                                                                                                                                                                                                                                                                                                                                                                                                                                                                                                                                                                                                                                                                                                                                                                                                                                                                                                                                                                                                                                                                                                                                                                                                                                                     |
| <p>"cazy AQO69862.1 Beta-1","4-mannooligosaccharide phosphorylase [Phycisphaerae bacterium SM-Chi-D1]"</p>                                                                                                                                                                                                                                                                                                                                                                                                                                                                                                                                                                                                                                                                                                                                                                                                                                                                                                                                                                                                                                                                                                                                                                                                                                                                                                                                                                                                                                                                                                                                                                                                                                                                                                     |
| <p>"cazy AQO71744.1 Beta-1","4-mannooligosaccharide phosphorylase [Phycisphaerae bacterium SM-Chi-D1]"</p>                                                                                                                                                                                                                                                                                                                                                                                                                                                                                                                                                                                                                                                                                                                                                                                                                                                                                                                                                                                                                                                                                                                                                                                                                                                                                                                                                                                                                                                                                                                                                                                                                                                                                                     |
| <p>"cazy AQT68108.1 Beta-1","4-mannooligosaccharide phosphorylase [Phycisphaerae bacterium ST-NAGAB-D1]"</p>                                                                                                                                                                                                                                                                                                                                                                                                                                                                                                                                                                                                                                                                                                                                                                                                                                                                                                                                                                                                                                                                                                                                                                                                                                                                                                                                                                                                                                                                                                                                                                                                                                                                                                   |
| <p>"cazy ASB38139.1 glycosidase [Muribaculum intestinale]",</p> <p>"mouseS-Fe10_GL0132028 [gene] locus=C955776_1:29603:30559:+ [Complete] codon-table.11",</p> <p>"pigPIG-001_GL0217556 [gene] locus=scaffold20914_2:432:1388:+ [Complete] codon-table.11",</p> <p>"pigPIG-011_GL0085855 [gene] locus=scaffold12435_3:133:1089:+ [Complete] codon-table.11",</p> <p>"cazy 1045279095 gb ANU63776.1  glycosidase [Parabacteroides sp. YL27]"</p>                                                                                                                                                                                                                                                                                                                                                                                                                                                                                                                                                                                                                                                                                                                                                                                                                                                                                                                                                                                                                                                                                                                                                                                                                                                                                                                                                                |
| <p>"cazy ASB41841.1 glycosidase [Acutalibacter muris]",</p> <p>"humangutV1.UC13-0_GL0061527 [gene] locus=scaffold24550_2:9491:10492:- [Complete] codon-table.11",</p> <p>"mouseS-Fe1_GL0086041 [gene] locus=scaffold9659_1:241:1242:+ [Complete] codon-table.11",</p> <p>"mouseS-Fe9_GL0239525 [gene] locus=scaffold7813_4:3386:4387:- [Lack 5'-end] codon-table.11",</p> <p>"mouse2-2_GL0055864 [gene] locus=scaffold122201_1:1830:2831:- [Complete] codon-table.11",</p> <p>"rumen583_GL0273127_1 [gene] locus=scaffold51578_2:12391:13392:-[Complete]",</p> <p>"cazy 1045270240 gb ANU54932.1  glycosidase [Ruminiclostridium sp. KB18]"</p>                                                                                                                                                                                                                                                                                                                                                                                                                                                                                                                                                                                                                                                                                                                                                                                                                                                                                                                                                                                                                                                                                                                                                                |
| <p>"cazy ASE63461.1 glycosidase [Chryseobacterium indologenes]",</p> <p>"cazy ASK31449.1 glycosidase [Chryseobacterium sp. T16E-39]",</p> <p>"cazy ASW75147.1 glycosidase [Chryseobacterium piperi]",</p> <p>"cazy ATA68024.1 glycosidase [Capnocytophaga cynodegmi]",</p> <p>"cazy ATA89573.1 glycosidase [Capnocytophaga stomatis]",</p>                                                                                                                                                                                                                                                                                                                                                                                                                                                                                                                                                                                                                                                                                                                                                                                                                                                                                                                                                                                                                                                                                                                                                                                                                                                                                                                                                                                                                                                                     |

"cazy|ATN07456.1 glycosidase [Chryseobacterium indologenes]",

"humangutMH0003\_GL0075746 [gene] locus=scaffold17037\_1:3556:4527:- [Complete] codon-table.11",

"humangutMH0004\_GL0033557 [gene] locus=scaffold48841\_2:72:1043:+ [Complete] codon-table.11",

"humangutMH0006\_GL0073708 [gene] locus=scaffold102740\_1:9518:10489:+ [Complete] codon-table.11",

"humangutMH0011\_GL0031624 [gene] locus=scaffold6982\_4:53:1024:+ [Complete] codon-table.11",

"humangutMH0038\_GL0023413 [gene] locus=scaffold14633\_3:21944:22915:+ [Complete] codon-table.11",

"humangutMH0046\_GL0032276 [gene] locus=scaffold45316\_2:186:1157:- [Complete] codon-table.11",

"humangutMH0047\_GL0000100 [gene] locus=scaffold9606\_1:7600:8571:- [Complete] codon-table.11",

"humangutMH0052\_GL0052339 [gene] locus=scaffold24048\_2:334:1305:- [Complete] codon-table.11",

"humangutMH0055\_GL0020468 [gene] locus=scaffold43568\_1:105:1076:- [Complete] codon-table.11",

"humangutMH0055\_GL0034072 [gene] locus=scaffold2797\_1:618:1589:- [Complete] codon-table.11",

"humangutMH0101\_GL0081430 [gene] locus=scaffold26934\_4:197:1168:- [Complete] codon-table.11",

"humangutMH0116\_GL0138390 [gene] locus=scaffold93220\_1:8256:9227:- [Complete] codon-table.11",

"humangutMH0126\_GL0121407 [gene] locus=scaffold133197\_1:12424:13395:+ [Complete] codon-table.11",

"humangutMH0140\_GL0083856 [gene] locus=scaffold94387\_1:12435:13406:+ [Complete] codon-table.11",

"humangutMH0281\_GL0165041 [gene] locus=scaffold38155\_1:2892:3863:- [Complete] codon-table.11",

"humangutMH0302\_GL0082303 [gene] locus=scaffold34643\_9:5730:6701:+ [Complete] codon-table.11",

"humangutMH0314\_GL0108231 [gene] locus=scaffold62845\_1:286:1257:- [Complete] codon-table.11",

"humangutMH0321\_GL0007378 [gene] locus=scaffold101808\_6:542:1513:- [Complete] codon-table.11",

"humangutMH0333\_GL0010365 [gene] locus=scaffold26160\_1:79693:80664:+ [Complete] codon-table.11",

"humangutMH0381\_GL0169932 [gene] locus=scaffold63368\_5:715:1686:- [Complete] codon-table.11",

"humangutMH0402\_GL0171617 [gene] locus=scaffold82462\_1:600:1571:+ [Complete] codon-table.11",

"humangutMH0435\_GL0062501 [gene] locus=scaffold79199\_1:19153:20124:+ [Complete] codon-table.11",

"humangutO2\_UC24-1\_GL0121919 [gene] locus=scaffold96768\_1:596:1567:- [Complete] codon-table.11",

"humangutO2\_UC31-1\_GL0148553 [gene] locus=scaffold47996\_1:8964:9935:- [Complete] codon-table.11",

"humangutN001A\_GL0039907 [gene] locus=scaffold52055\_1:11991:12962:+ [Complete] codon-table.11",

"humangutN085A\_GL0030918 [gene] locus=C534392\_1:50:1021:- [Complete] codon-table.11",

"humangut158256496-stool1\_revised\_C965981\_1\_gene88806 strand:- start:1110 stop:2081 length:972 start\_codon:yes stop\_codon:yes gene\_type:complete [Complete] codon-table.11",

"humangut765560005-stool1\_revised\_scaffold23582\_1\_gene63099 strand:+ start:17288 stop:18259 length:972 start\_codon:yes stop\_codon:yes gene\_type:complete [Complete] codon-table.11",

"mouseGroup2-5A\_GL0021665 [gene] locus=scaffold9730\_7:244:1215:- [Complete] codon-table.11",

"mouse10\_GL0099266 [gene] locus=scaffold30593\_1:26097:27068:- [Complete] codon-table.11",

"mouse2B-dyr19-06\_GL0008674 [gene] locus=scaffold6602\_8:2261:3232:- [Complete] codon-table.11",

"pigPIG\_119\_GL0347395 [gene] locus=scaffold142087\_9:19322:20293:- [Complete] codon-table.11",

"rumen555\_GL0373485\_1 [gene] locus=scaffold156620\_7:3306:4277:+[Complete]",

"cazy|g|939203325|gb|ALJ61498.1| Beta-1", "4-mannooligosaccharide phosphorylase [Bacteroides cellulosilyticus]",

"cazy|g|319416378|gb|ADV43489.1| glycosidase related protein [Bacteroides helcogenes P 36-108]",

"cazy|g|570741375|gb|AHF12135.1| glycosidase [Barnesiella viscericola DSM 18177]",

"cazy|g|828458824|gb|AKK72745.1| glycosidase [Chryseobacterium gallinarum]",

"cazy|g|674269942|db|BAP29335.1| glycosidase [Chryseobacterium sp. STRB126]"

---

"cazy|ASM70687.1 glycosidase [Blautia hansenii DSM 20583]",

"humangutMH0010\_GL0000927 [gene] locus=scaffold579\_12:2396:3382:+ [Complete] codon-table.11",

"humangutMH0372\_GL0052869 [gene] locus=scaffold80648\_1:8151:9137:- [Complete] codon-table.11",



"humangutMH0373\_GL0083014 [gene] locus=scaffold4398\_14:1479:2465:- [Complete] codon-table.11",

"humangutV1.CD12-3\_GL0040072 [gene] locus=scaffold26822\_2:25571:26557:+ [Complete] codon-table.11",

"humangutDLM013\_GL0046706 [gene] locus=scaffold3678\_7:1871:2857:+ [Complete] codon-table.11",

"mouseMC-0-3\_GL0005804 [gene] locus=scaffold2810\_2:2716:3702:- [Complete] codon-table.11",

"mouseG1-5A\_GL0007008 [gene] locus=scaffold1620\_3:9842:10828:- [Complete] codon-table.11",

"mouse1-1\_GL0058502 [gene] locus=scaffold63511\_9:1433:2419:+ [Complete] codon-table.11",

"mouse1-1\_GL0105382 [gene] locus=scaffold33983\_1:9839:10825:+ [Complete] codon-table.11",

"mouse1-1\_GL0143778 [gene] locus=scaffold320\_1:568:1554:- [Complete] codon-table.11",

"mouse1-2\_GL0060243 [gene] locus=scaffold42352\_1:11675:12661:+ [Complete] codon-table.11",

"mouse13\_GL0004655 [gene] locus=scaffold51777\_1:888:1874:- [Complete] codon-table.11",

"mouse2-3\_GL0096850 [gene] locus=scaffold59790\_1:64775:65761:+ [Complete] codon-table.11",

"mouse4-1\_GL0051115 [gene] locus=scaffold40970\_1:1024:2010:- [Complete] codon-table.11",

"mouse6-2\_GL0024360 [gene] locus=scaffold14875\_2:46984:47970:- [Complete] codon-table.11",

"pigPIG\_119\_GL0171139 [gene] locus=scaffold190017\_2:160:1146:+ [Complete] codon-table.11",

"pigDB-512B\_GL0151230 [gene] locus=scaffold208408\_1:239:1225:- [Complete] codon-table.11",

"pigDB-517B\_GL0133330 [gene] locus=scaffold7355\_1:53:1039:+ [Complete] codon-table.11",

"pigSYZ-448B\_GL0114656 [gene] locus=scaffold56409\_1:565:1551:- [Complete] codon-table.11",

"pigZXZ-8B\_GL0242426 [gene] locus=scaffold182904\_1:899:1885:+ [Complete] codon-table.11",

"rumen555\_GL1091079\_1 [gene] locus=scaffold730046\_1:2368:3354:+ [Complete]",

"cazygijl291541206|emb|CBL14317.1| Predicted glycosylase [Roseburia intestinalis XB6B4]"

---

["cazy|AST53133.1 glycosidase [Parabacteroides sp. CT06]",

"cazy|AUJ45968.1 glycosidase [Bacteroides fragilis]",

"cazy|BAD48081.1 conserved hypothetical protein [Bacteroides fragilis YCH46]",

"humangutMH0006\_GL0038257 [gene] locus=scaffold31109\_4:10469:11467:+ [Complete] codon-table.11",

"humangutMH0009\_GL0004248 [gene] locus=scaffold36082\_1:7444:8442:+ [Complete] codon-table.11",

"humangutMH0041\_GL0063443 [gene] locus=scaffold14739\_8:354:1352:+ [Complete] codon-table.11",

"humangutMH0090\_GL0006072 [gene] locus=scaffold32146\_4:2418:3416:- [Complete] codon-table.11",

"humangutMH0101\_GL0076321 [gene] locus=scaffold20113\_4:6408:7406:+ [Complete] codon-table.11",

"humangutMH0118\_GL0029001 [gene] locus=scaffold39394\_2:19067:20065:+ [Complete] codon-table.11",

"humangutMH0138\_GL0004080 [gene] locus=scaffold2292\_5:177:1175:+ [Complete] codon-table.11",

"humangutMH0158\_GL0053814 [gene] locus=scaffold49547\_5:7904:8902:+ [Complete] codon-table.11",

"humangutMH0229\_GL0055276 [gene] locus=scaffold569\_3:11097:12095:- [Complete] codon-table.11",

"humangutMH0309\_GL0132661 [gene] locus=scaffold411\_12:14013:15011:- [Complete] codon-table.11",

"humangutMH0374\_GL0074973 [gene] locus=scaffold6906\_4:765:1763:+ [Complete] codon-table.11",

"humangutMH0400\_GL0011364 [gene] locus=scaffold62787\_1:260:1258:- [Complete] codon-table.11",

"humangutO2.CD2-0\_GL0013926 [gene] locus=scaffold22628\_1:41883:42881:+ [Complete] codon-table.11",

"humangutT2D-109A\_GL0010527 [gene] locus=scaffold27792\_1:3383:4381:- [Complete] codon-table.11",

"humangut160765029-stool1\_revised\_scaffold20596\_1\_gene110346 strand:- start:1088 stop:2086 length:999 start\_codon:yes stop\_codon:yes gene\_type:complete [Complete] codon-table.11",

"humangut679189.HMPREF9019\_2256 [Complete]:- codon-table.11",

"mouseS-Fe1\_GL0016303 [gene] locus=scaffold1736\_1:85704:86702:- [Complete] codon-table.11",

"mouseGroup2-7A\_GL0107291 [gene] locus=scaffold63922\_9:525:1523:+ [Complete] codon-table.11",

"pigPIG-003\_GL0043079 [gene] locus=scaffold88790\_11:2555:3553:+ [Complete] codon-table.11",

"pigPIG-006\_GL0134772 [gene] locus=scaffold124202\_5:2132:3130:+ [Complete] codon-table.11",

|                                                                                                                                                                                                                                                                                                                                                                                                                                                                                                                                                                                                                                                                                                                                                                                                                                                                                                                                                                                                                                                                                                                                                                                                                                                                                                                                                                                                                                                                                                                                                                                                                                                                                                                                                                                                                                                                                                                                                                                                                                                                                                                                                                                                                                                                                                                                                                                                                                                       |
|-------------------------------------------------------------------------------------------------------------------------------------------------------------------------------------------------------------------------------------------------------------------------------------------------------------------------------------------------------------------------------------------------------------------------------------------------------------------------------------------------------------------------------------------------------------------------------------------------------------------------------------------------------------------------------------------------------------------------------------------------------------------------------------------------------------------------------------------------------------------------------------------------------------------------------------------------------------------------------------------------------------------------------------------------------------------------------------------------------------------------------------------------------------------------------------------------------------------------------------------------------------------------------------------------------------------------------------------------------------------------------------------------------------------------------------------------------------------------------------------------------------------------------------------------------------------------------------------------------------------------------------------------------------------------------------------------------------------------------------------------------------------------------------------------------------------------------------------------------------------------------------------------------------------------------------------------------------------------------------------------------------------------------------------------------------------------------------------------------------------------------------------------------------------------------------------------------------------------------------------------------------------------------------------------------------------------------------------------------------------------------------------------------------------------------------------------------|
| <p>"pigPIG-007_GL0093565 [gene] locus=scaffold151718_2:575:1573:- [Complete] codon-table.11",</p> <p>"pigPIG-008_GL0134693 [gene] locus=scaffold118693_3:8735:9733:+ [Complete] codon-table.11",</p> <p>"pigPIG-014_GL0048635 [gene] locus=scaffold53272_1:79528:80526:- [Complete] codon-table.11",</p> <p>"pigPIG-031_GL0208473 [gene] locus=scaffold4037_1:606:1604:- [Complete] codon-table.11",</p> <p>"pigPIG-034_GL0166059 [gene] locus=scaffold145591_1:3384:4382:+ [Complete] codon-table.11",</p> <p>"pigPIG-067_GL0036307 [gene] locus=scaffold151267_1:93:1091:+ [Complete] codon-table.11",</p> <p>"pigBHZ-11B_GL0010546 [gene] locus=scaffold75456_1:206:1204:- [Complete] codon-table.11",</p> <p>"rumen553_GL0024980_1 [gene] locus=scaffold986_1:3966:4964:+[Complete]",</p> <p>"rumen553_GL0119108_1 [gene] locus=C7497718_1:60:1058:+[Complete]",</p> <p>"rumen553_GL0208890_1 [gene] locus=scaffold368380_1:10895:11893:+[Complete]",</p> <p>"rumen552_GL0523106_1 [gene] locus=scaffold127266_4:20569:21567:-[Complete]",</p> <p>"rumen552_GL0818245_1 [gene] locus=scaffold261788_5:3840:4838:-[Complete]",</p> <p>"rumen552_GL1282954_1 [gene] locus=scaffold481957_2:28:1026:-[Complete]",</p> <p>"rumen554_GL2994928_1 [gene] locus=scaffold1409865_1:12853:13851:-[Complete]",</p> <p>"rumen555_GL1179928_1 [gene] locus=scaffold1172364_12:9197:10195:-[Complete]",</p> <p>"rumen555_GL1208700_1 [gene] locus=scaffold25095_2:2304:3302:+[Complete]",</p> <p>"rumen555_GL1860074_1 [gene] locus=scaffold155906_2:32477:33475:+[Complete]",</p> <p>"rumen2009040_GL1348356_1 [gene] locus=scaffold574579_5:2330:3328:+[Complete]",</p> <p>"cazygi 922661194 emb CUA17878.1  Beta-1", "4-mannooligosaccharide phosphorylase [Bacteroides fragilis]",</p> <p>"cazygi 794205266 gb AKA51257.1  glycosidase [Bacteroides fragilis]",</p> <p>"cazygi 1042800252 gb ANQ59899.1  glycosidase [Bacteroides fragilis]",</p> <p>"cazygi 159890459 gb ABX03539.1  glycosidase PH1107-related [Herpetosiphon aurantiacus DSM 785]",</p> <p>"cazygi 149935713 gb ABR42410.1  conserved hypothetical protein [Parabacteroides distasonis ATCC 8503]",</p> <p>"cazygi 433302576 gb AGB28392.1  putative glycosylase [Prevotella dentalis DSM 3688]",</p> <p>"cazygi 953019838 gb ALC049545.1  glycosidase [Prevotella enoece]",</p> <p>"cazygi 643431564 gb AIA99576.1  hypothetical protein [uncultured bacterium contig00010(2014)]"</p> |
| <p>["cazy AUP80075.1 glycosidase [Flavivirga eckloniae]",</p> <p>"cazygi 88707752 gb EAQ99992.1  hypothetical protein FB2170_01422 [Maribacter sp. HTCC2170]"</p>                                                                                                                                                                                                                                                                                                                                                                                                                                                                                                                                                                                                                                                                                                                                                                                                                                                                                                                                                                                                                                                                                                                                                                                                                                                                                                                                                                                                                                                                                                                                                                                                                                                                                                                                                                                                                                                                                                                                                                                                                                                                                                                                                                                                                                                                                     |
| <p>["cazy AUS96708.1 glycosidase [Pseudoclostridium thermosuccinogenes]",</p> <p>"mouseG1-3A_GL0026020 [gene] locus=scaffold13529_3:9003:9998:+ [Complete] codon-table.11",</p> <p>"mouse2-1_GL0075368 [gene] locus=scaffold5530_3:189:1184:+ [Complete] codon-table.11",</p> <p>"mouse2-1_GL0088592 [gene] locus=scaffold67877_1:8952:9947:- [Complete] codon-table.11",</p> <p>"rumen7049_GL2441192_1 [gene] locus=scaffold413534_6:2009:3004:+[Complete]"</p>                                                                                                                                                                                                                                                                                                                                                                                                                                                                                                                                                                                                                                                                                                                                                                                                                                                                                                                                                                                                                                                                                                                                                                                                                                                                                                                                                                                                                                                                                                                                                                                                                                                                                                                                                                                                                                                                                                                                                                                      |
| <p>["cazy AVM42902.1 glycosidase [Fastidiosipila sanguinis]",</p> <p>"pigPIG_144_GL0105367 [gene] locus=C3793824_1:63:1073:- [Complete] codon-table.11]"</p>                                                                                                                                                                                                                                                                                                                                                                                                                                                                                                                                                                                                                                                                                                                                                                                                                                                                                                                                                                                                                                                                                                                                                                                                                                                                                                                                                                                                                                                                                                                                                                                                                                                                                                                                                                                                                                                                                                                                                                                                                                                                                                                                                                                                                                                                                          |
| <p>["cazy AVM47165.1 glycosidase [Victivallales bacterium CCUG 44730]"</p>                                                                                                                                                                                                                                                                                                                                                                                                                                                                                                                                                                                                                                                                                                                                                                                                                                                                                                                                                                                                                                                                                                                                                                                                                                                                                                                                                                                                                                                                                                                                                                                                                                                                                                                                                                                                                                                                                                                                                                                                                                                                                                                                                                                                                                                                                                                                                                            |
| <p>["cazy AVM69290.1 glycosidase [Lachnospiraceae bacterium oral taxon 500]",</p> <p>"humangutMH0211_GL0069392 [gene] locus=scaffold22191_7:9815:10804:+ [Complete] codon-table.11",</p> <p>"humangutO2_UC20-1_GL0005080 [gene] locus=scaffold8006_6:1167:2156:+ [Complete] codon-table.11",</p> <p>"humangutO2_UC38-1_GL0042109 [gene] locus=scaffold5461_3:58:1047:+ [Complete] codon-table.11",</p> <p>"humangutT2D-22A_GL0097388 [gene] locus=scaffold30195_1:14784:15773:+ [Complete] codon-table.11",</p> <p>"mouseS-Fe12_GL0116109 [gene] locus=scaffold79297_8:2528:3517:+ [Complete] codon-table.11",</p> <p>"mouseMC-0-1_GL0105636 [gene] locus=scaffold93524_1:280:1269:- [Complete] codon-table.11",</p> <p>"mouse1A-dyr4-07_GL0106525 [gene] locus=scaffold51198_3:410:1399:- [Complete] codon-table.11",</p>                                                                                                                                                                                                                                                                                                                                                                                                                                                                                                                                                                                                                                                                                                                                                                                                                                                                                                                                                                                                                                                                                                                                                                                                                                                                                                                                                                                                                                                                                                                                                                                                                            |

"mouse2-3\_GL0005066 [gene] locus=scaffold46218\_4:52117:53106:- [Complete] codon-table.11",

"mouse35\_GL0122006 [gene] locus=scaffold47094\_5:7249:8238:+ [Complete] codon-table.11",

"mouse4-2\_GL0099480 [gene] locus=scaffold60900\_2:12283:13272:- [Complete] codon-table.11",

"mouse54\_GL0079445 [gene] locus=scaffold7983\_6:3156:4145:- [Complete] codon-table.11",

"pigPIG\_116\_GL0134633 [gene] locus=scaffold168385\_2:1338:2327:- [Complete] codon-table.11",

"rumen583\_GL0632373\_1 [gene] locus=scaffold100870\_2:3216:4205:-[Complete]",

"rumen100058\_GL3559996\_1 [gene] locus=scaffold448284\_8:2020:3009:-[Complete]"

---

["cazy|AWV32554.1 glycosylase [Paenibacillus odorifer]",

"cazy|686562517|gb|AIQ73210.1| glycosylase [Paenibacillus odorifer]",

"cazy|690621768|gb|AIQ22782.1| glycosylase [Paenibacillus sp. FSL H7-0737]",

"cazy|686523885|gb|AIQ34585.1| glycosylase [Paenibacillus sp. FSL R5-0345]"

---

["cazy|AXB29277.1 glycosylase [Faecalibacterium prausnitzii]",

"humangutMH0193\_GL0079555 [gene] locus=scaffold80193\_1:8807:9826:- [Complete] codon-table.11",

"humangutMH0434\_GL0140597 [gene] locus=scaffold83331\_17:877:1896:- [Complete] codon-table.11",

"humangutO2.UC21-2\_GL0102009 [gene] locus=scaffold17595\_1:33:1052:- [Complete] codon-table.11",

"humangut706846339-stool1\_revised\_scaffold23726\_3\_gene129109 strand:- start:3386 stop:4405 length:1020 start\_codon:yes stop\_codon:yes gene\_type:complete [Complete] codon-table.11",

"mouseMC-0-1\_GL0064823 [gene] locus=scaffold53168\_13:7491:8510:- [Complete] codon-table.11",

"mouseMC-0-1\_GL0086097 [gene] locus=scaffold75211\_4:225:1244:- [Complete] codon-table.11",

"mouseMC-6-1\_GL0107989 [gene] locus=scaffold75276\_1:7108:8127:- [Complete] codon-table.11",

"pigPIG\_144\_GL0061430 [gene] locus=scaffold282677\_1:886:1905:+ [Complete] codon-table.11",

"pigPIG-009\_GL0138986 [gene] locus=scaffold3128\_3:383:1402:+ [Complete] codon-table.11",

"pigPIG-017\_GL0190980 [gene] locus=scaffold105253\_2:863:1882:- [Complete] codon-table.11",

"pigPIG-034\_GL0075037 [gene] locus=scaffold145714\_2:6349:7368:+ [Complete] codon-table.11",

"pigPIG-059\_GL0145572 [gene] locus=scaffold21026\_6:1306:2325:- [Complete] codon-table.11",

"pigPIG-061\_GL0061185 [gene] locus=scaffold150548\_2:61:1080:+ [Complete] codon-table.11",

"pigBHZ-10B\_GL0178364 [gene] locus=scaffold94497\_9:2950:3969:- [Complete] codon-table.11",

"pigEYZ-592B\_GL0198908 [gene] locus=scaffold45536\_2:65969:66988:+ [Complete] codon-table.11",

"rumen553\_GL0062626\_1 [gene] locus=scaffold65877\_2:603:1622:+[Complete]",

"rumen553\_GL0289551\_1 [gene] locus=scaffold227037\_4:2407:3426:-[Complete]",

"rumen552\_GL0163252\_1 [gene] locus=scaffold156556\_4:634:1653:-[Complete]",

"rumen583\_GL0160972\_1 [gene] locus=scaffold139414\_1:2651:3670:+[Complete]",

"rumen583\_GL0709304\_1 [gene] locus=scaffold196890\_1:2693:3712:+[Complete]",

"rumen583\_GL0824088\_1 [gene] locus=scaffold316177\_1:142:1161:+[Complete]",

"rumen554\_GL0769507\_1 [gene] locus=scaffold1153488\_1:465:1484:+[Complete]",

"rumen554\_GL1748617\_1 [gene] locus=scaffold462637\_8:1625:2644:-[Complete]",

"rumen554\_GL2286209\_1 [gene] locus=scaffold407690\_3:118:1137:-[Complete]",

"rumen554\_GL2590785\_1 [gene] locus=scaffold94633\_5:3:1019:-[Lack both ends]",

"rumen555\_GL1294659\_1 [gene] locus=scaffold755112\_1:13012:14031:-[Complete]",

"rumen555\_GL1894784\_1 [gene] locus=scaffold1146238\_1:140:1159:+[Complete]",

"rumen555\_GL2262294\_1 [gene] locus=scaffold561072\_3:195:1214:-[Complete]",

"rumen100058\_GL0162288\_1 [gene] locus=scaffold1342822\_1:11998:13017:-[Complete]",

"rumen2009040\_GL1491257\_1 [gene] locus=scaffold36167\_4:443:1462:+[Complete]",

"rumen2009040\_GL1560257\_1 [gene] locus=scaffold3072615\_1:280:1299:-[Complete]",

"rumen3042\_GL1401775\_1 [gene] locus=scaffold1017850\_7:206:1225:+[Complete]",

"cazy|295104428|emb|CBL01972.1| Predicted glycosylase [Faecalibacterium prausnitzii SL3/3"]

["cazy|AYF38257.1 glycosylase [Ethanoligenens harbinense]",

"cazy|AYF41003.1 glycosylase [Ethanoligenens harbinense]",

"humangutMH0053\_GL0075281 [gene] locus=scaffold7906\_13:8322:9347:+[Complete] codon-table.11",

"humangutMH0143\_GL0066611 [gene] locus=scaffold10045\_5:68901:69926:-[Complete] codon-table.11",

"humangutMH0239\_GL0155109 [gene] locus=scaffold10725\_5:1010:2035:+[Complete] codon-table.11",

"humangutMH0431\_GL0109397 [gene] locus=scaffold114921\_1:80419:81444:-[Complete] codon-table.11",

"humangutO2\_UC12-1\_GL0066556 [gene] locus=scaffold50205\_3:28:1053:-[Complete] codon-table.11",

"humangutO2\_UC8-0\_GL0078900 [gene] locus=scaffold39947\_3:125:1150:+[Complete] codon-table.11",

"humangutT2D-108A\_GL0038945 [gene] locus=scaffold102521\_1:17645:18670:+[Complete] codon-table.11",

"humangutT2D-11A\_GL0038543 [gene] locus=scaffold59242\_6:13368:14393:-[Complete] codon-table.11",

"mouseS-Fe10\_GL0047342 [gene] locus=scaffold35905\_2:487:1512:+[Complete] codon-table.11",

"mouse2-2\_GL0057369 [gene] locus=scaffold117963\_5:20591:21616:+[Complete] codon-table.11",

"mouse7-1\_GL0080165 [gene] locus=scaffold575\_1:1575:2600:+[Complete] codon-table.11",

"mouse7-5\_GL0135179 [gene] locus=scaffold49132\_1:3791:4816:+[Complete] codon-table.11",

"mouse8-3\_GL0003503 [gene] locus=scaffold64522\_1:3462:4487:+[Complete] codon-table.11",

"pigPIG-001\_GL0131189 [gene] locus=scaffold52084\_1:16361:17386:+[Complete] codon-table.11",

"pigPIG-025\_GL0024354 [gene] locus=scaffold56563\_3:642:1667:-[Complete] codon-table.11",

"pigPIG-037\_GL0164496 [gene] locus=scaffold32231\_1:46604:47629:+[Complete] codon-table.11",

"pigPIG-054\_GL0165254 [gene] locus=scaffold157312\_1:13377:14402:+[Complete] codon-table.11",

"pigPIG-060\_GL0078259 [gene] locus=scaffold108689\_2:901:1926:+[Complete] codon-table.11",

"pigPIG-107\_GL0030546 [gene] locus=scaffold130215\_1:57358:58383:+[Complete] codon-table.11",

"pigPIG-109\_GL0153660 [gene] locus=scaffold15355\_2:1398:2423:+[Complete] codon-table.11",

"pigSYZ-481B\_GL0077449 [gene] locus=scaffold73765\_3:2:1027:+[Lack 5'-end] codon-table.11",

"rumen552\_GL0212503\_1 [gene] locus=scaffold34627\_1:17573:18598:+[Complete]",

"rumen552\_GL0260102\_1 [gene] locus=scaffold870516\_2:503:1528:+[Complete]",

"rumen552\_GL0699264\_1 [gene] locus=scaffold586952\_1:15165:16190:-[Complete]",

"rumen583\_GL0042904\_1 [gene] locus=scaffold225231\_1:5042:6067:+[Complete]",

"rumen583\_GL0063682\_1 [gene] locus=scaffold268085\_3:56557:57582:+[Complete]",

"rumen583\_GL0754105\_1 [gene] locus=scaffold195983\_1:22689:23714:+[Complete]",

"rumen554\_GL0695329\_1 [gene] locus=scaffold2141897\_1:676:1701:-[Complete]",

"rumen554\_GL2664813\_1 [gene] locus=scaffold150755\_1:1588:2613:-[Complete]",

"rumen555\_GL0962278\_1 [gene] locus=scaffold903670\_6:4081:5106:+[Complete]",

"rumen555\_GL1563354\_1 [gene] locus=scaffold12362\_1:1157:2182:-[Complete]",

"rumen0081\_GL0221277\_1 [gene] locus=scaffold713930\_3:15667:16692:-[Complete]",

"rumen0081\_GL2192118\_1 [gene] locus=C39822215\_1:922:1947:+[Complete]",

"rumen0081\_GL2239602\_1 [gene] locus=scaffold792061\_4:521:1546:-[Complete]",

"rumen100058\_GL0658159\_1 [gene] locus=scaffold219057\_1:4551:5576:-[Complete]",

"rumen100058\_GL1286058\_1 [gene] locus=scaffold901462\_10:2321:3346:+[Complete]",

"rumen100058\_GL2613818\_1 [gene] locus=scaffold2582560\_3:167:1192:-[Complete]",

"rumen100058\_GL3613107\_1 [gene] locus=scaffold1858877\_1:1:1026:+[Lack 5'-end]",

"rumen2009040\_GL0506093\_1 [gene] locus=scaffold2066715\_2:622:1647:+[Complete]",

"rumen2009040\_GL0767965\_1 [gene] locus=scaffold1487504\_2:915:1940:+[Complete]",

|                                                                                                                                                                                                                                                                                                                                                                                                                                                                                                                                                                                                                                                                                                                                                                                                                                                                                                                                                                                                                                                                                                                                                                                                                                                                                      |
|--------------------------------------------------------------------------------------------------------------------------------------------------------------------------------------------------------------------------------------------------------------------------------------------------------------------------------------------------------------------------------------------------------------------------------------------------------------------------------------------------------------------------------------------------------------------------------------------------------------------------------------------------------------------------------------------------------------------------------------------------------------------------------------------------------------------------------------------------------------------------------------------------------------------------------------------------------------------------------------------------------------------------------------------------------------------------------------------------------------------------------------------------------------------------------------------------------------------------------------------------------------------------------------|
| <p>"rumen2009040_GL1136740_1 [gene] locus=scaffold543396_1:197:1222:+[Complete]",</p> <p>"rumen2009040_GL1916699_1 [gene] locus=scaffold1597861_1:916:1941:-[Complete]",</p> <p>"rumen2009040_GL2361668_1 [gene] locus=scaffold2277265_2:1780:2805:+[Complete]",</p> <p>"rumen2009040_GL3557692_1 [gene] locus=scaffold872905_4:3590:4615:-[Complete]",</p> <p>"rumen7049_GL0522168_1 [gene] locus=scaffold426564_3:399:1424:-[Complete]",</p> <p>"rumen7049_GL0810742_1 [gene] locus=scaffold1432378_1:203:1228:+[Complete]",</p> <p>"rumen7049_GL1850379_1 [gene] locus=scaffold1085425_2:2462:3487:+[Complete]",</p> <p>"rumen7049_GL2607885_1 [gene] locus=scaffold34287_6:2306:3331:-[Complete]",</p> <p>"cazygi 295094606 emb CBK83697.1  Predicted glycosylase [Coproccoccus sp. ART55/1]",</p> <p>"cazygi 315469860 gb ADU26464.1  glycosidase related protein [Ethanolgenens harbinense YUAN-3]"</p>                                                                                                                                                                                                                                                                                                                                                                        |
| <p>["cazy SCV09583.1 hypothetical protein BACOV975_03377 [Bacteroides ovatus V975]",</p> <p>"humangutMH0003_GL0007967 [gene] locus=scaffold40843_2:227:1234:- [Complete] codon-table.11",</p> <p>"humangutMH0180_GL0015791 [gene] locus=scaffold4132_7:2616:3623:- [Complete] codon-table.11",</p> <p>"humangut159551223-stool1_revised_scaffold18547_1_gene104513 strand:+ start:1324 stop:2331 length:1008 start_codon:yes stop_codon:yes gene_type:complete [Complete] codon-table.11",</p> <p>"mouse28_GL0101701 [gene] locus=scaffold63073_4:20538:21545:- [Complete] codon-table.11",</p> <p>"pigPIG_191_GL0230098 [gene] locus=scaffold75479_1:3:1010:+ [Lack 5'-end] codon-table.11"]</p>                                                                                                                                                                                                                                                                                                                                                                                                                                                                                                                                                                                    |
| <p>["cazy SMF88250.1 beta-1", "4-mannooligosaccharide/beta-1", "4-mannosyl-N-acetylglucosamine phosphorylase [Paenibacillus uliginis N3/975]",</p> <p>"mouse1-1_GL0045549 [gene] locus=scaffold87940_1:27786:28784:- [Complete] codon-table.11",</p> <p>"mouse14_GL0003911 [gene] locus=scaffold6104_5:488:1486:- [Complete] codon-table.11",</p> <p>"mouse2-2_GL0059722 [gene] locus=scaffold52241_3:1:999:+ [Lack 5'-end] codon-table.11",</p> <p>"mouse5-8_GL0044701 [gene] locus=scaffold54091_13:882:1880:- [Complete] codon-table.11",</p> <p>"mouse7-8_GL0036592 [gene] locus=scaffold4684_2:4628:5626:+ [Complete] codon-table.11",</p> <p>"rumen100058_GL3852657_1 [gene] locus=scaffold336949_4:988:1986:+[Complete]",</p> <p>"rumen2009040_GL3580840_1 [gene] locus=scaffold2454716_1:117:1115:+[Complete]",</p> <p>"cazygi 309390304 gb ADO78184.1  glycosidase related protein [Halanaerobium praevalens DSM 2228]",</p> <p>"cazygi 686549305 gb AIQ60001.1  glycosidase [Paenibacillus borealis]",</p> <p>"cazygi 686520539 gb AIQ31240.1  glycosidase [Paenibacillus sp. FSL P4-0081]",</p> <p>"cazygi 686532065 gb AIQ42764.1  glycosidase [Paenibacillus sp. FSL R5-0912]",</p> <p>"cazygi 766900956 gb AJS57688.1  glycosidase [Paenibacillus sp. IHBB 10380]"</p> |
| <p>["cazy SSC11544.1 Beta-1", "4-mannooligosaccharide phosphorylase [Mesotoga infera]",</p> <p>"cazygi 387859209 gb AFK07300.1  putative glycosylase [Mesotoga prima MesG1.Ag.4.2]",</p> <p>"cazygi 387859280 gb AFK07371.1  putative glycosylase [Mesotoga prima MesG1.Ag.4.2]"</p>                                                                                                                                                                                                                                                                                                                                                                                                                                                                                                                                                                                                                                                                                                                                                                                                                                                                                                                                                                                                 |
| <p>["humangut158256496-stool1_revised_C835833_1_gene174095 strand:- start:3 stop:542 length:540 start_codon:no stop_codon:no gene_type:incomplete [Lack both ends] codon-table.11"]</p>                                                                                                                                                                                                                                                                                                                                                                                                                                                                                                                                                                                                                                                                                                                                                                                                                                                                                                                                                                                                                                                                                              |
| <p>["humangut158458797-stool1_revised_scaffold28805_1_gene79507 strand:- start:264 stop:896 length:633 start_codon:no stop_codon:yes gene_type:incomplete [Lack 5'-end] codon-table.11"]</p>                                                                                                                                                                                                                                                                                                                                                                                                                                                                                                                                                                                                                                                                                                                                                                                                                                                                                                                                                                                                                                                                                         |
| <p>["humangut158479027-stool1_revised_scaffold30056_1_gene47194 strand:+ start:3 stop:989 length:987 start_codon:no stop_codon:yes gene_type:incomplete [Lack 5'-end] codon-table.11"]</p>                                                                                                                                                                                                                                                                                                                                                                                                                                                                                                                                                                                                                                                                                                                                                                                                                                                                                                                                                                                                                                                                                           |
| <p>["humangut158499257-stool2_revised_C1279497_1_gene58504 strand:- start:59 stop:1018 length:960 start_codon:yes stop_codon:yes gene_type:complete [Complete] codon-table.11",</p> <p>"mouseS-Fe10_GL0133378 [gene] locus=scaffold53511_1:8190:9149:+ [Complete] codon-table.11",</p> <p>"mouseS-Fe4_GL0042600 [gene] locus=scaffold73848_2:23173:24132:+ [Complete] codon-table.11"]</p>                                                                                                                                                                                                                                                                                                                                                                                                                                                                                                                                                                                                                                                                                                                                                                                                                                                                                           |

|                                                                                                                                                                                                                                                                                            |
|--------------------------------------------------------------------------------------------------------------------------------------------------------------------------------------------------------------------------------------------------------------------------------------------|
| <p>["humangut158499257-stool2_revised_scaffold72386_1_gene163327 strand:- start:342 stop:1319 length:978 start_codon:yes stop_codon:yes gene_type:complete<br/>[Complete] codon-table.11",<br/>"humangut340101.Vvad_PD0761 [Complete]:- codon-table.11"]</p>                               |
| <p>["humangut158499257-stool2_revised_scaffold72531_1_gene159875 strand:- start:4341 stop:5312 length:972 start_codon:yes stop_codon:yes gene_type:complete<br/>[Complete] codon-table.11"]</p>                                                                                            |
| <p>["humangut158802708-stool1_revised_C1008059_1_gene86467 strand:- start:3134 stop:4063 length:930 start_codon:no stop_codon:yes gene_type:incomplete [Lack 5'-end] codon-table.11"]</p>                                                                                                  |
| <p>["humangut159227541-stool2_revised_C945178_1_gene16611 strand:+ start:843 stop:1808 length:966 start_codon:yes stop_codon:yes gene_type:complete [Complete] codon-table.11"]</p>                                                                                                        |
| <p>["humangut159571453-stool1_revised_scaffold14955_1_gene41830 strand:- start:2 stop:499 length:498 start_codon:no stop_codon:no gene_type:incomplete [Lack both ends] codon-table.11"]</p>                                                                                               |
| <p>["humangut159571453-stool2_revised_C1173406_1_gene60413 strand:- start:527 stop:1723 length:1197 start_codon:no stop_codon:yes gene_type:incomplete [Lack 5'-end] codon-table.11"]</p>                                                                                                  |
| <p>["humangut159733294-stool1_revised_scaffold14067_1_gene118451 strand:+ start:3 stop:1031 length:1029 start_codon:no stop_codon:yes gene_type:incomplete [Lack 5'-end] codon-table.11"]</p>                                                                                              |
| <p>["humangut160704339-stool1_revised_C1402643_1_gene146236 strand:+ start:2157 stop:3194 length:1038 start_codon:yes stop_codon:yes gene_type:complete<br/>[Complete] codon-table.11"]</p>                                                                                                |
| <p>["humangut160704339-stool1_revised_scaffold30429_2_gene61233 strand:- start:44 stop:1027 length:984 start_codon:yes stop_codon:yes gene_type:complete [Complete] codon-table.11"]</p>                                                                                                   |
| <p>["humangut160765029-stool1_revised_scaffold5378_2_gene125289 strand:- start:886 stop:1713 length:828 start_codon:no stop_codon:yes gene_type:incomplete [Lack 5'-end] codon-table.11"]</p>                                                                                              |
| <p>["humangut508703490-stool1_revised_scaffold18895_1_gene4490 strand:+ start:153 stop:929 length:777 start_codon:yes stop_codon:no gene_type:incomplete [Lack 3'-end] codon-table.11"]</p>                                                                                                |
| <p>["humangut604812005-stool2_revised_C648904_1_gene64050 strand:+ start:115 stop:678 length:564 start_codon:yes stop_codon:no gene_type:incomplete [Lack 3'-end] codon-table.11"]</p>                                                                                                     |
| <p>["humangut763678604-stool1_revised_scaffold63435_2_gene111067 strand:+ start:3 stop:1016 length:1014 start_codon:no stop_codon:yes gene_type:incomplete [Lack 5'-end] codon-table.11",<br/>"mouse1-1_GL0007446 [gene] locus=scaffold21897_2:2716:3729:+ [Complete] codon-table.11"]</p> |
| <p>["humangut763759525-stool1_revised_scaffold7590_1_gene57992 strand:- start:1004 stop:1987 length:984 start_codon:yes stop_codon:yes gene_type:complete<br/>[Complete] codon-table.11"]</p>                                                                                              |
| <p>["humangut764062976-stool1_revised_scaffold42844_1_gene85098 strand:+ start:3778 stop:4797 length:1020 start_codon:yes stop_codon:yes gene_type:complete<br/>[Complete] codon-table.11"]</p>                                                                                            |
| <p>["humangut764325968-stool1_revised_C587037_1_gene57487 strand:+ start:2 stop:1138 length:1137 start_codon:no stop_codon:yes gene_type:incomplete [Lack 5'-end] codon-table.11",<br/>"mouse10_GL0002655 [gene] locus=scaffold8820_1:23230:24366:- [Complete] codon-table.11"]</p>        |
| <p>["humangut764487809-stool1_revised_scaffold41314_1_gene32942 strand:+ start:830 stop:1630 length:801 start_codon:yes stop_codon:no gene_type:incomplete [Lack 3'-end] codon-table.11"]</p>                                                                                              |
| <p>["humangut764588959-stool1_revised_C809727_1_gene161960 strand:- start:629 stop:1474 length:846 start_codon:no stop_codon:yes gene_type:incomplete [Lack 5'-end] codon-table.11"]</p>                                                                                                   |
| <p>["humangutDLF006_GL0019934 [gene] locus=scaffold11533_10:432:1037:+ [Lack 3'-end] codon-table.11",<br/>"pigPIG_196_GL0235344 [gene] locus=scaffold40058_2:409:1014:+ [Lack 3'-end] codon-table.11"]</p>                                                                                 |
| <p>["humangutDLM015_GL0024411 [gene] locus=scaffold32325_4:31:618:- [Lack 5'-end] codon-table.11"]</p>                                                                                                                                                                                     |

|                                                                                                                                                                                                                                                                                                                                                                                                                                                                                                                                                                                                                                                                                                                                                                                                                                                                                                                                                                                                                                                                                                                                                                                                                                                                                                                                                                                                                                                                                                                                                                                                                                                        |
|--------------------------------------------------------------------------------------------------------------------------------------------------------------------------------------------------------------------------------------------------------------------------------------------------------------------------------------------------------------------------------------------------------------------------------------------------------------------------------------------------------------------------------------------------------------------------------------------------------------------------------------------------------------------------------------------------------------------------------------------------------------------------------------------------------------------------------------------------------------------------------------------------------------------------------------------------------------------------------------------------------------------------------------------------------------------------------------------------------------------------------------------------------------------------------------------------------------------------------------------------------------------------------------------------------------------------------------------------------------------------------------------------------------------------------------------------------------------------------------------------------------------------------------------------------------------------------------------------------------------------------------------------------|
| ["humangutDLM019_GL0089165 [gene] locus=C792839_1:838:1386:+ [Lack 3'-end] codon-table.11"]                                                                                                                                                                                                                                                                                                                                                                                                                                                                                                                                                                                                                                                                                                                                                                                                                                                                                                                                                                                                                                                                                                                                                                                                                                                                                                                                                                                                                                                                                                                                                            |
| ["humangutDOF008_GL0075713 [gene] locus=scaffold5558_22:2304:2819:+ [Complete] codon-table.11"]                                                                                                                                                                                                                                                                                                                                                                                                                                                                                                                                                                                                                                                                                                                                                                                                                                                                                                                                                                                                                                                                                                                                                                                                                                                                                                                                                                                                                                                                                                                                                        |
| ["humangutDOM005_GL0030995 [gene] locus=scaffold13634_4:2297:3319:- [Complete] codon-table.11"]                                                                                                                                                                                                                                                                                                                                                                                                                                                                                                                                                                                                                                                                                                                                                                                                                                                                                                                                                                                                                                                                                                                                                                                                                                                                                                                                                                                                                                                                                                                                                        |
| ["humangutDOM015_GL0044842 [gene] locus=scaffold20149_2:60:1133:- [Complete] codon-table.11"]                                                                                                                                                                                                                                                                                                                                                                                                                                                                                                                                                                                                                                                                                                                                                                                                                                                                                                                                                                                                                                                                                                                                                                                                                                                                                                                                                                                                                                                                                                                                                          |
| ["humangutHT14A_GL0112810 [gene] locus=scaffold12911_2:3:737:- [Lack 3'-end] codon-table.11"]                                                                                                                                                                                                                                                                                                                                                                                                                                                                                                                                                                                                                                                                                                                                                                                                                                                                                                                                                                                                                                                                                                                                                                                                                                                                                                                                                                                                                                                                                                                                                          |
| ["humangutHT25A_GL0012985 [gene] locus=scaffold13608_1:1:555:- [Lack both ends] codon-table.11"]                                                                                                                                                                                                                                                                                                                                                                                                                                                                                                                                                                                                                                                                                                                                                                                                                                                                                                                                                                                                                                                                                                                                                                                                                                                                                                                                                                                                                                                                                                                                                       |
| ["humangutMH0001_GL0006833 [gene] locus=scaffold20375_1:360:1361:- [Complete] codon-table.11",<br>"humangutMH0002_GL0050993 [gene] locus=scaffold21434_2:5265:6266:- [Complete] codon-table.11",<br>"humangutMH0284_GL0164857 [gene] locus=scaffold227_2:11462:12463:- [Complete] codon-table.11",<br>"humangutNOF013_GL0042668 [gene] locus=scaffold16252_2:37056:38057:+ [Complete] codon-table.11",<br>"humangutT2D-135A_GL0108516 [gene] locus=scaffold4791_1:58343:59344:- [Complete] codon-table.11",<br>"mouseMC-6-2_GL0049587 [gene] locus=scaffold33069_1:833:1834:+ [Complete] codon-table.11",<br>"mouseG1-1A_GL0117276 [gene] locus=scaffold86222_1:11338:12339:+ [Complete] codon-table.11",<br>"mouse10_GL0009130 [gene] locus=scaffold65698_1:30989:31990:+ [Complete] codon-table.11",<br>"mouse10_GL0040594 [gene] locus=scaffold31213_3:486:1487:- [Complete] codon-table.11",<br>"rumen553_GL0152112_1 [gene] locus=scaffold435106_1:22873:23874:+[Complete]",<br>"rumen555_GL0767286_1 [gene] locus=scaffold869588_1:31827:32828:-[Complete]",<br>"rumen7049_GL0427735_1 [gene] locus=scaffold336103_8:1493:2494:-[Complete]",<br>"cazygi 922838593 gb ALA72633.1  glycosidase [Bacteroides dorei]",<br>"cazygi 671713472 gb All65745.1  glycosidase [Bacteroides dorei]",<br>"cazygi 671714526 gb All66798.1  glycosidase [Bacteroides dorei]",<br>"cazygi 1026627367 gb AND18573.1  glycosidase [Bacteroides dorei CL03T12C01]",<br>"cazygi 149931622 gb ABR38320.1  conserved hypothetical protein [Bacteroides vulgatus ATCC 8482]",<br>"cazygi 941509161 gb ALK82696.1  putative glycoside hydrolase [Bacteroides vulgatus]"] |
| ["humangutMH0002_GL0074276 [gene] locus=scaffold25860_7:11505:12485:+ [Complete] codon-table.11",<br>"humangutMH0175_GL0056294 [gene] locus=scaffold21715_11:2532:3512:- [Complete] codon-table.11",<br>"humangutMH0200_GL0090971 [gene] locus=scaffold107042_3:412:1392:- [Lack 5'-end] codon-table.11",<br>"humangutMH0369_GL0104891 [gene] locus=scaffold115450_2:41781:42761:+ [Complete] codon-table.11",<br>"pigPIG_125_GL0035608 [gene] locus=scaffold233897_3:294:1274:- [Complete] codon-table.11",<br>"pigPIG-035_GL0065099 [gene] locus=scaffold74040_2:21474:22454:+ [Complete] codon-table.11",<br>"pigPIG-058_GL0059068 [gene] locus=scaffold16066_1:770:1750:+ [Complete] codon-table.11",<br>"pigBHZ-10B_GL0263822 [gene] locus=scaffold195385_2:211:1191:- [Complete] codon-table.11"]                                                                                                                                                                                                                                                                                                                                                                                                                                                                                                                                                                                                                                                                                                                                                                                                                                                |
| ["humangutMH0003_GL0070288 [gene] locus=scaffold22546_4:2110:3174:- [Complete] codon-table.11",<br>"mouseMC-6-4_GL0100222 [gene] locus=scaffold71050_1:176952:178016:+ [Complete] codon-table.11",<br>"mouseG1-3A_GL0132082 [gene] locus=scaffold84469_1:6217:7281:+ [Complete] codon-table.11",<br>"pigPIG-001_GL0017370 [gene] locus=scaffold135436_1:3032:4096:- [Complete] codon-table.11"]                                                                                                                                                                                                                                                                                                                                                                                                                                                                                                                                                                                                                                                                                                                                                                                                                                                                                                                                                                                                                                                                                                                                                                                                                                                        |
| ["humangutMH0006_GL0073173 [gene] locus=scaffold44109_4:3285:4316:- [Complete] codon-table.11",<br>"rumen554_GL0351222_1 [gene] locus=scaffold1306023_1:537:1568:-[Complete]",<br>"rumen554_GL1022066_1 [gene] locus=scaffold952786_2:1533:2564:+[Complete]",<br>"rumen554_GL3107611_1 [gene] locus=scaffold491579_2:801:1832:-[Complete]",<br>"rumen555_GL2221633_1 [gene] locus=scaffold391993_1:1454:2485:-[Complete]",<br>"rumen0081_GL0339967_1 [gene] locus=scaffold8278_2:105:1136:-[Complete]",<br>"rumen0081_GL0510561_1 [gene] locus=scaffold200904_3:934:1965:+[Complete]",<br>"rumen100058_GL0159733_1 [gene] locus=scaffold80811_4:718:1749:+[Complete]",                                                                                                                                                                                                                                                                                                                                                                                                                                                                                                                                                                                                                                                                                                                                                                                                                                                                                                                                                                                 |

|                                                                                                                                                                                                                                                                                                                                                                                                                                                                                                                                                                                                                                                                                                                                                                                                                                                                                                                                                                                                                                                                                                                                                                                                                                                                                                                                                                                                                                                                                                                                                                                                                                                                                                                                                                                                                                                                                                                                                                                                                                                                                                                                                                                                     |
|-----------------------------------------------------------------------------------------------------------------------------------------------------------------------------------------------------------------------------------------------------------------------------------------------------------------------------------------------------------------------------------------------------------------------------------------------------------------------------------------------------------------------------------------------------------------------------------------------------------------------------------------------------------------------------------------------------------------------------------------------------------------------------------------------------------------------------------------------------------------------------------------------------------------------------------------------------------------------------------------------------------------------------------------------------------------------------------------------------------------------------------------------------------------------------------------------------------------------------------------------------------------------------------------------------------------------------------------------------------------------------------------------------------------------------------------------------------------------------------------------------------------------------------------------------------------------------------------------------------------------------------------------------------------------------------------------------------------------------------------------------------------------------------------------------------------------------------------------------------------------------------------------------------------------------------------------------------------------------------------------------------------------------------------------------------------------------------------------------------------------------------------------------------------------------------------------------|
| <p>"rumen100058_GL1341543_1 [gene] locus=scaffold965193_2:1013:2044:-[Complete]",</p> <p>"rumen100058_GL2877558_1 [gene] locus=scaffold15954_1:3782:4813:+[Complete]",</p> <p>"rumen100058_GL3324878_1 [gene] locus=scaffold1542797_3:1022:2053:+[Complete]",</p> <p>"rumen2009040_GL0605756_1 [gene] locus=scaffold785353_2:4431:5462:-[Complete]",</p> <p>"rumen2009040_GL1454879_1 [gene] locus=scaffold1374058_2:5810:6841:-[Complete]",</p> <p>"rumen2009040_GL2494979_1 [gene] locus=scaffold785460_1:3:1034:+[Lack 5'-end]",</p> <p>"rumen3042_GL1617281_1 [gene] locus=scaffold334575_1:195:1226:-[Complete]",</p> <p>"rumen7049_GL1194146_1 [gene] locus=scaffold857149_2:2902:3933:+[Complete]"</p>                                                                                                                                                                                                                                                                                                                                                                                                                                                                                                                                                                                                                                                                                                                                                                                                                                                                                                                                                                                                                                                                                                                                                                                                                                                                                                                                                                                                                                                                                       |
| <p>["humangutMH0006_GL0079366 [gene] locus=scaffold37415_1:14309:15319:- [Complete] codon-table.11",</p> <p>"humangutMH0066_GL0062751 [gene] locus=scaffold42541_1:20708:21718:+ [Complete] codon-table.11",</p> <p>"humangutMH0153_GL0014600 [gene] locus=scaffold9405_52:4828:5838:+ [Complete] codon-table.11",</p> <p>"humangutV1_UC32-0_GL0004308 [gene] locus=scaffold73750_5:1328:2338:+ [Complete] codon-table.11",</p> <p>"humangutNLM003_GL0025011 [gene] locus=scaffold4615_5:1:1011:+ [Lack 5'-end] codon-table.11",</p> <p>"humangutED16A_GL0084421 [gene] locus=scaffold56845_10:3:1013:+ [Lack 5'-end] codon-table.11",</p> <p>"humangut160765029-stool1_revised_scaffold20279_1_gene36266 strand:- start:3221 stop:4231 length:1011 start_codon:yes stop_codon:yes gene_type:complete [Complete] codon-table.11",</p> <p>"humangut765135172-stool1_revised_scaffold5747_1_gene85184 strand:- start:671 stop:1681 length:1011 start_codon:yes stop_codon:yes gene_type:complete [Complete] codon-table.11",</p> <p>"mouseMC-6-1_GL0021356 [gene] locus=scaffold11166_1:6050:7060:+ [Complete] codon-table.11",</p> <p>"mouse1-1_GL0044908 [gene] locus=scaffold74334_1:62839:63849:- [Complete] codon-table.11",</p> <p>"pigPIG_122_GL0032378 [gene] locus=scaffold213557_2:1:1011:+ [Lack 5'-end] codon-table.11",</p> <p>"cazygi 390424090(gb) AFL78596.1  putative glycosylase [Alistipes finegoldii DSM 17242]"</p>                                                                                                                                                                                                                                                                                                                                                                                                                                                                                                                                                                                                                                                                                                                                                              |
| <p>["humangutMH0012_GL007633 [gene] locus=scaffold5089_1:34892:35926:- [Complete] codon-table.11",</p> <p>"humangutMH0086_GL0046571 [gene] locus=scaffold33385_5:36023:37057:+ [Complete] codon-table.11",</p> <p>"humangutMH0143_GL0096593 [gene] locus=scaffold18775_3:3:1037:+ [Lack 5'-end] codon-table.11",</p> <p>"humangutMH0247_GL0061712 [gene] locus=scaffold8399_21:1823:2857:- [Complete] codon-table.11",</p> <p>"humangutT2D-133A_GL0022420 [gene] locus=scaffold11867_33:3:1037:+ [Lack 5'-end] codon-table.11",</p> <p>"mouseS-Fe3_GL0078026 [gene] locus=scaffold9711_7:434:1468:- [Complete] codon-table.11",</p> <p>"mouseG1-1A_GL0008998 [gene] locus=scaffold3859_1:50223:51257:+ [Complete] codon-table.11",</p> <p>"mouseG1-5A_GL0080408 [gene] locus=scaffold51540_3:5228:6262:+ [Complete] codon-table.11",</p> <p>"mouseG1-5A_GL0112859 [gene] locus=scaffold77446_3:50345:51379:- [Complete] codon-table.11",</p> <p>"mouse1-1_GL0015202 [gene] locus=scaffold14214_14:1328:2362:- [Complete] codon-table.11",</p> <p>"mouse2-1_GL0026530 [gene] locus=scaffold83145_2:17848:18882:- [Complete] codon-table.11",</p> <p>"mouse2-3_GL0035306 [gene] locus=scaffold59252_3:14398:15432:- [Complete] codon-table.11",</p> <p>"mouse2-5_GL0068667 [gene] locus=scaffold23663_4:4599:5633:- [Complete] codon-table.11",</p> <p>"mouse6-2_GL0021672 [gene] locus=scaffold52589_2:21989:23023:+ [Complete] codon-table.11",</p> <p>"pigPIG-034_GL0052637 [gene] locus=scaffold42231_2:4221:5255:- [Complete] codon-table.11",</p> <p>"pigPIG-044_GL0183933 [gene] locus=scaffold106266_1:1:1035:+ [Lack 5'-end] codon-table.11",</p> <p>"pigPIG-077_GL0171451 [gene] locus=scaffold28563_6:20172:21206:+ [Complete] codon-table.11",</p> <p>"rumen552_GL0500597_1 [gene] locus=scaffold214801_2:6581:7615:-[Complete]",</p> <p>"rumen552_GL1374890_1 [gene] locus=scaffold1084712_1:2632:3666:-[Complete]",</p> <p>"rumen583_GL0572358_1 [gene] locus=scaffold335058_1:123985:125019:-[Complete]",</p> <p>"rumen0081_GL1164626_1 [gene] locus=scaffold2012364_1:291:1325:+[Complete]",</p> <p>"rumen7049_GL1801325_1 [gene] locus=scaffold477292_6:11863:12897:-[Complete]"</p> |



|                                                                                                                                                                                                                                                                                                                                                                                                                                                                                                                                                                                                                                                                                                                                                                                                                                                                                                                                                                                                                                                                                                                                                                                                                                                                                                                                                                                                                                                                                                                                                                                                                                                                                                                                                                                                                |
|----------------------------------------------------------------------------------------------------------------------------------------------------------------------------------------------------------------------------------------------------------------------------------------------------------------------------------------------------------------------------------------------------------------------------------------------------------------------------------------------------------------------------------------------------------------------------------------------------------------------------------------------------------------------------------------------------------------------------------------------------------------------------------------------------------------------------------------------------------------------------------------------------------------------------------------------------------------------------------------------------------------------------------------------------------------------------------------------------------------------------------------------------------------------------------------------------------------------------------------------------------------------------------------------------------------------------------------------------------------------------------------------------------------------------------------------------------------------------------------------------------------------------------------------------------------------------------------------------------------------------------------------------------------------------------------------------------------------------------------------------------------------------------------------------------------|
| <p>"humangutMH0012_GL0162861 [gene] locus=scaffold99774_3:7903:8856:- [Complete] codon-table.11",</p> <p>"pigPIG_137_GL0139699 [gene] locus=scaffold30657_11:3:956:- [Complete] codon-table.11"]</p>                                                                                                                                                                                                                                                                                                                                                                                                                                                                                                                                                                                                                                                                                                                                                                                                                                                                                                                                                                                                                                                                                                                                                                                                                                                                                                                                                                                                                                                                                                                                                                                                           |
| <p>"humangutMH0013_GL0037620 [gene] locus=scaffold110_1:673:1623:- [Complete] codon-table.11",</p> <p>"humangutMH0053_GL0068920 [gene] locus=scaffold626_4:1802:2752:- [Complete] codon-table.11",</p> <p>"humangutMH0096_GL0116454 [gene] locus=scaffold2538_23:2068:3018:- [Complete] codon-table.11",</p> <p>"humangutMH0124_GL0124320 [gene] locus=scaffold477_9:3873:4823:- [Complete] codon-table.11",</p> <p>"humangutMH0262_GL0043670 [gene] locus=scaffold20731_13:199:1149:- [Complete] codon-table.11",</p> <p>"pigPIG_116_GL0215284 [gene] locus=scaffold191671_1:11165:12115:+ [Complete] codon-table.11",</p> <p>"pigPIG-012_GL0140313 [gene] locus=scaffold106884_1:1608:2558:- [Complete] codon-table.11",</p> <p>"pigPIG-025_GL0054893 [gene] locus=scaffold36974_1:10841:11791:- [Complete] codon-table.11",</p> <p>"pigPIG-090_GL0059069 [gene] locus=scaffold32602_5:42:992:- [Complete] codon-table.11",</p> <p>"pigBHZ-7B_GL0139024 [gene] locus=scaffold13472_1:11996:12946:- [Complete] codon-table.11",</p> <p>"pigEYZ-120B_GL0317062 [gene] locus=scaffold25512_11:1726:2676:+ [Complete] codon-table.11",</p> <p>"rumen100058_GL3096331_1 [gene] locus=scaffold38791_2:649:1599:-[Complete]",</p> <p>"rumen2009040_GL0441176_1 [gene] locus=scaffold2048064_4:8118:9068:+[Complete]",</p> <p>"rumen2009040_GL2810383_1 [gene] locus=scaffold675163_2:701:1651:+[Complete]"</p>                                                                                                                                                                                                                                                                                                                                                                                                      |
| <p>"humangutMH0017_GL0009327 [gene] locus=scaffold30260_19:291:1316:+ [Complete] codon-table.11"]</p>                                                                                                                                                                                                                                                                                                                                                                                                                                                                                                                                                                                                                                                                                                                                                                                                                                                                                                                                                                                                                                                                                                                                                                                                                                                                                                                                                                                                                                                                                                                                                                                                                                                                                                          |
| <p>"humangutMH0030_GL0005166 [gene] locus=scaffold11561_2:3462:4541:- [Complete] codon-table.11",</p> <p>"humangutMH0308_GL0161116 [gene] locus=scaffold89184_2:1904:2983:+ [Complete] codon-table.11"]</p>                                                                                                                                                                                                                                                                                                                                                                                                                                                                                                                                                                                                                                                                                                                                                                                                                                                                                                                                                                                                                                                                                                                                                                                                                                                                                                                                                                                                                                                                                                                                                                                                    |
| <p>"humangutMH0037_GL0017616 [gene] locus=scaffold455_20:3:869:- [Lack 3'-end] codon-table.11"]</p>                                                                                                                                                                                                                                                                                                                                                                                                                                                                                                                                                                                                                                                                                                                                                                                                                                                                                                                                                                                                                                                                                                                                                                                                                                                                                                                                                                                                                                                                                                                                                                                                                                                                                                            |
| <p>"humangutMH0045_GL0029867 [gene] locus=scaffold19450_1:11569:12354:- [Complete] codon-table.11",</p> <p>"rumen555_GL2328202_1 [gene] locus=scaffold210456_1:2698:3483:+[Complete]"</p>                                                                                                                                                                                                                                                                                                                                                                                                                                                                                                                                                                                                                                                                                                                                                                                                                                                                                                                                                                                                                                                                                                                                                                                                                                                                                                                                                                                                                                                                                                                                                                                                                      |
| <p>"humangutMH0046_GL0024529 [gene] locus=scaffold45167_3:1:723:- [Lack 3'-end] codon-table.11"]</p>                                                                                                                                                                                                                                                                                                                                                                                                                                                                                                                                                                                                                                                                                                                                                                                                                                                                                                                                                                                                                                                                                                                                                                                                                                                                                                                                                                                                                                                                                                                                                                                                                                                                                                           |
| <p>"humangutMH0048_GL0000259 [gene] locus=scaffold5871_5:2:685:- [Lack 3'-end] codon-table.11"]</p>                                                                                                                                                                                                                                                                                                                                                                                                                                                                                                                                                                                                                                                                                                                                                                                                                                                                                                                                                                                                                                                                                                                                                                                                                                                                                                                                                                                                                                                                                                                                                                                                                                                                                                            |
| <p>"humangutMH0054_GL0021605 [gene] locus=scaffold4199_1:5393:6364:+ [Complete] codon-table.11",</p> <p>"humangutMH0130_GL0002707 [gene] locus=scaffold9609_4:1742:2713:+ [Complete] codon-table.11",</p> <p>"pigPIG-046_GL0086195 [gene] locus=scaffold121955_1:7422:8393:+ [Complete] codon-table.11"]</p>                                                                                                                                                                                                                                                                                                                                                                                                                                                                                                                                                                                                                                                                                                                                                                                                                                                                                                                                                                                                                                                                                                                                                                                                                                                                                                                                                                                                                                                                                                   |
| <p>"humangutMH0054_GL0061333 [gene] locus=scaffold2139_1:9118:10125:+ [Complete] codon-table.11",</p> <p>"humangutMH0074_GL0033152 [gene] locus=scaffold11828_3:5629:6636:- [Complete] codon-table.11",</p> <p>"humangutMH0108_GL0051486 [gene] locus=scaffold20039_1:1751:2758:- [Complete] codon-table.11",</p> <p>"humangutMH0161_GL0092587 [gene] locus=scaffold22931_19:976:1983:+ [Complete] codon-table.11",</p> <p>"humangutMH0198_GL0004874 [gene] locus=scaffold10037_3:28908:29915:- [Complete] codon-table.11",</p> <p>"humangutMH0230_GL0094142 [gene] locus=scaffold12339_1:207:1214:- [Complete] codon-table.11",</p> <p>"humangutMH0262_GL0144422 [gene] locus=scaffold52175_4:7243:8250:+ [Complete] codon-table.11",</p> <p>"humangutMH0266_GL0143819 [gene] locus=scaffold11364_6:5967:6974:+ [Complete] codon-table.11",</p> <p>"humangutMH0302_GL0090532 [gene] locus=scaffold18882_3:3640:4647:- [Complete] codon-table.11",</p> <p>"humangutMH0319_GL0103473 [gene] locus=scaffold51083_1:2038:3045:- [Complete] codon-table.11",</p> <p>"humangutMH0443_GL0062302 [gene] locus=scaffold41370_3:685:1692:- [Complete] codon-table.11",</p> <p>"humangutO2.CD1-0_GL0163366 [gene] locus=scaffold71766_1:2173:3180:- [Complete] codon-table.11",</p> <p>"humangutO2.UC22-1_GL0037024 [gene] locus=scaffold63429_1:1363:2370:+ [Complete] codon-table.11",</p> <p>"humangutO2.UC41-1_GL0201289 [gene] locus=scaffold117952_1:9172:10179:- [Complete] codon-table.11",</p> <p>"humangutV1.CD44-0_GL0031209 [gene] locus=scaffold58205_2:3053:4060:- [Complete] codon-table.11",</p> <p>"humangutV1.UC35-0_GL0004173 [gene] locus=scaffold3407_10:2948:3955:- [Complete] codon-table.11",</p> <p>"humangutN084A_GL0036398 [gene] locus=C703110_1:2353:3360:- [Complete] codon-table.11",</p> |

|                                                                                                                                                                                                                                                                                                                                                                                                                                                                                                                                                                                                                        |
|------------------------------------------------------------------------------------------------------------------------------------------------------------------------------------------------------------------------------------------------------------------------------------------------------------------------------------------------------------------------------------------------------------------------------------------------------------------------------------------------------------------------------------------------------------------------------------------------------------------------|
| "humangutT2D-102A_GL0023114 [gene] locus=scaffold75873_1:11748:12755:+ [Complete] codon-table.11",                                                                                                                                                                                                                                                                                                                                                                                                                                                                                                                     |
| "humangutT2D-26A_GL0009503 [gene] locus=scaffold61396_3:3667:4674:- [Complete] codon-table.11",                                                                                                                                                                                                                                                                                                                                                                                                                                                                                                                        |
| "humangut158337416-stool1_revised_scaffold3342_1_gene86922 strand:+ start:1305 stop:2312 length:1008 start_codon:yes stop_codon:yes gene_type:complete<br>[Complete] codon-table.11",                                                                                                                                                                                                                                                                                                                                                                                                                                  |
| "humangut158499257-stool2_revised_scaffold65358_1_gene61956 strand:- start:1947 stop:2954 length:1008 start_codon:yes stop_codon:yes gene_type:complete<br>[Complete] codon-table.11",                                                                                                                                                                                                                                                                                                                                                                                                                                 |
| "humangut638754422-stool1_revised_scaffold3920_1_gene57956 strand:+ start:50352 stop:51359 length:1008 start_codon:yes stop_codon:yes gene_type:complete<br>[Complete] codon-table.11",                                                                                                                                                                                                                                                                                                                                                                                                                                |
| "mouseS-Fe10_GL0143739 [gene] locus=scaffold225_2:92194:93201:+ [Complete] codon-table.11",                                                                                                                                                                                                                                                                                                                                                                                                                                                                                                                            |
| "mouseMC-6-3_GL0005908 [gene] locus=scaffold1945_2:39217:40224:- [Complete] codon-table.11",                                                                                                                                                                                                                                                                                                                                                                                                                                                                                                                           |
| "mouse13_GL0077551 [gene] locus=scaffold22877_5:279:1286:- [Complete] codon-table.11",                                                                                                                                                                                                                                                                                                                                                                                                                                                                                                                                 |
| "mouse1B-dyr12-07_GL0031314 [gene] locus=scaffold7349_1:1957:2964:- [Complete] codon-table.11",                                                                                                                                                                                                                                                                                                                                                                                                                                                                                                                        |
| "mouse20_GL0163161 [gene] locus=scaffold113299_1:18879:19886:+ [Complete] codon-table.11",                                                                                                                                                                                                                                                                                                                                                                                                                                                                                                                             |
| "mouse31_GL0048804 [gene] locus=scaffold122_4:3:1010:- [Complete] codon-table.11",                                                                                                                                                                                                                                                                                                                                                                                                                                                                                                                                     |
| "pigPIG-022_GL0151450 [gene] locus=scaffold29824_1:1050:2057:+ [Complete] codon-table.11",                                                                                                                                                                                                                                                                                                                                                                                                                                                                                                                             |
| "cazygij 291515082 emb CBK64292.1  Predicted glycosylase [Alistipes shahii WAL 8301]"                                                                                                                                                                                                                                                                                                                                                                                                                                                                                                                                  |
| ["humangutMH0056_GL0032889 [gene] locus=scaffold15457_2:3:626:- [Lack both ends] codon-table.11"]                                                                                                                                                                                                                                                                                                                                                                                                                                                                                                                      |
| ["humangutMH0062_GL0052144 [gene] locus=scaffold11559_1:467:1039:+ [Lack 3'-end] codon-table.11"]                                                                                                                                                                                                                                                                                                                                                                                                                                                                                                                      |
| ["humangutMH0062_GL0073614 [gene] locus=scaffold7351_1:214:1296:- [Complete] codon-table.11"]                                                                                                                                                                                                                                                                                                                                                                                                                                                                                                                          |
| ["humangutMH0069_GL0038472 [gene] locus=scaffold61521_1:3346:4335:- [Complete] codon-table.11",<br>"pigEYZ-362B_GL0018425 [gene] locus=scaffold177282_1:1379:2368:- [Complete] codon-table.11",<br>"rumen554_GL0544849_1 [gene] locus=scaffold1148971_4:4608:5597:+[Complete]",<br>"rumen100058_GL2223164_1 [gene] locus=scaffold374389_2:568:1557:-[Complete]",<br>"rumen2009040_GL0511168_1 [gene] locus=scaffold1187221_7:2589:3578:+[Complete]",<br>"rumen2009040_GL0855763_1 [gene] locus=scaffold1884549_2:1:990:-[Complete]",<br>"rumen2009040_GL1256803_1 [gene] locus=scaffold565906_6:7292:8281:-[Complete]" |
| ["humangutMH0070_GL0022753 [gene] locus=scaffold14051_3:586:1587:- [Complete] codon-table.11"]                                                                                                                                                                                                                                                                                                                                                                                                                                                                                                                         |
| ["humangutMH0077_GL0062682 [gene] locus=scaffold13129_1:2:718:+ [Lack 5'-end] codon-table.11"]                                                                                                                                                                                                                                                                                                                                                                                                                                                                                                                         |
| ["humangutMH0077_GL0064107 [gene] locus=scaffold30884_2:4060:5295:+ [Complete] codon-table.11"]                                                                                                                                                                                                                                                                                                                                                                                                                                                                                                                        |
| ["humangutMH0091_GL0103697 [gene] locus=scaffold41416_11:207:1037:- [Lack 5'-end] codon-table.11"]                                                                                                                                                                                                                                                                                                                                                                                                                                                                                                                     |
| ["humangutMH0113_GL0096944 [gene] locus=scaffold39885_3:27249:28211:+ [Complete] codon-table.11",<br>"mouse10_GL0047205 [gene] locus=scaffold56474_1:14525:15487:+ [Complete] codon-table.11"]                                                                                                                                                                                                                                                                                                                                                                                                                         |
| ["humangutMH0116_GL0149865 [gene] locus=scaffold78008_1:1:954:+ [Lack 5'-end] codon-table.11"]                                                                                                                                                                                                                                                                                                                                                                                                                                                                                                                         |
| ["humangutMH0125_GL0107874 [gene] locus=scaffold9295_9:1331:2371:- [Complete] codon-table.11"]                                                                                                                                                                                                                                                                                                                                                                                                                                                                                                                         |
| ["humangutMH0131_GL0124864 [gene] locus=scaffold52942_5:5191:6336:+ [Complete] codon-table.11"]                                                                                                                                                                                                                                                                                                                                                                                                                                                                                                                        |
| ["humangutMH0141_GL0105826 [gene] locus=scaffold50519_7:2:856:- [Lack 3'-end] codon-table.11",<br>"rumen552_GL1031059_1 [gene] locus=C22050106_1:212:1066:+[Lack 3'-end]",<br>"rumen3042_GL1593958_1 [gene] locus=scaffold1149001_1:5221:6075:+[Lack 3'-end]"                                                                                                                                                                                                                                                                                                                                                          |
| ["humangutMH0144_GL0085137 [gene] locus=scaffold33826_7:1081:2079:+ [Complete] codon-table.11",<br>"mouseGroup2-3A_GL0037234 [gene] locus=scaffold15184_2:2801:3799:+ [Complete] codon-table.11",<br>"rumen553_GL0333566_1 [gene] locus=scaffold4789_3:231:1229:-[Complete]",<br>"rumen553_GL0724914_1 [gene] locus=scaffold109429_2:65133:66131:+[Complete]",<br>"rumen553_GL0803416_1 [gene] locus=scaffold433819_1:3652:4650:+[Complete]",<br>"rumen553_GL0877558_1 [gene] locus=scaffold218042_2:402:1400:+[Complete]"                                                                                             |

|                                                                                                                                                                                                                                                                                                                                                                                                                                                                                                                                                                                                                                                                                                                                                                                                                                                                                                                                                                                                                       |
|-----------------------------------------------------------------------------------------------------------------------------------------------------------------------------------------------------------------------------------------------------------------------------------------------------------------------------------------------------------------------------------------------------------------------------------------------------------------------------------------------------------------------------------------------------------------------------------------------------------------------------------------------------------------------------------------------------------------------------------------------------------------------------------------------------------------------------------------------------------------------------------------------------------------------------------------------------------------------------------------------------------------------|
| <p>"rumen552_GL0168191_1 [gene] locus=scaffold16320_9:190:1188:+[Complete]",</p> <p>"rumen552_GL0331847_1 [gene] locus=C22507414_1:6988:7986:-[Complete]",</p> <p>"rumen583_GL0091630_1 [gene] locus=scaffold310069_1:8390:9388:+[Complete]",</p> <p>"rumen554_GL0668499_1 [gene] locus=C41165291_1:140:1138:+[Complete]",</p> <p>"rumen555_GL0499302_1 [gene] locus=scaffold755544_2:1509:2507:-[Complete]",</p> <p>"rumen555_GL1686954_1 [gene] locus=scaffold1131879_2:7001:7999:+[Complete]",</p> <p>"rumen0081_GL1720882_1 [gene] locus=scaffold76176_13:863:1861:+[Complete]",</p> <p>"rumen2009040_GL3655194_1 [gene] locus=scaffold1232779_3:57:1055:-[Complete]",</p> <p>"rumen7049_GL0409848_1 [gene] locus=scaffold1618727_1:230:1228:+[Complete]",</p> <p>"cazygi 571257543 emb CCO03868.1  Glycoside Hydrolase Family 130 protein [Ruminococcus bicirculans]"</p>                                                                                                                                        |
| <p>["humangutMH0147_GL0058267 [gene] locus=scaffold34624_4:1454:2605:- [Complete] codon-table.11"]</p>                                                                                                                                                                                                                                                                                                                                                                                                                                                                                                                                                                                                                                                                                                                                                                                                                                                                                                                |
| <p>["humangutMH0149_GL0065606 [gene] locus=scaffold3870_10:11473:12516:+ [Complete] codon-table.11",</p> <p>"humangutT2D-140A_GL0072840 [gene] locus=scaffold30211_2:293:1336:- [Complete] codon-table.11",</p> <p>"mouseMC-0-1_GL0081617 [gene] locus=scaffold70529_1:7132:8175:- [Complete] codon-table.11",</p> <p>"mouseGroup2-5A_GL0067020 [gene] locus=scaffold39731_17:2777:3820:- [Complete] codon-table.11",</p> <p>"mouse2B-dyr23-07_GL0027859 [gene] locus=C454172_1:1632:2675:+ [Complete] codon-table.11",</p> <p>"rumen554_GL1095844_1 [gene] locus=scaffold247511_2:47:1090:+[Complete]",</p> <p>"rumen100058_GL0662624_1 [gene] locus=scaffold1264265_3:4856:5899:-[Complete]"</p>                                                                                                                                                                                                                                                                                                                    |
| <p>["humangutMH0149_GL0135257 [gene] locus=scaffold77841_3:14376:15386:- [Complete] codon-table.11"]</p>                                                                                                                                                                                                                                                                                                                                                                                                                                                                                                                                                                                                                                                                                                                                                                                                                                                                                                              |
| <p>["humangutMH0168_GL0097676 [gene] locus=scaffold917_5:195:773:- [Lack 5'-end] codon-table.11"]</p>                                                                                                                                                                                                                                                                                                                                                                                                                                                                                                                                                                                                                                                                                                                                                                                                                                                                                                                 |
| <p>["humangutMH0170_GL0071387 [gene] locus=scaffold10595_4:127:999:+ [Lack 3'-end] codon-table.11"]</p>                                                                                                                                                                                                                                                                                                                                                                                                                                                                                                                                                                                                                                                                                                                                                                                                                                                                                                               |
| <p>["humangutMH0186_GL0082655 [gene] locus=scaffold21459_11:4293:5051:+ [Lack 3'-end] codon-table.11",</p> <p>"pigBHZ-4B_GL0100091 [gene] locus=scaffold145523_2:2:760:- [Lack 3'-end] codon-table.11"]</p>                                                                                                                                                                                                                                                                                                                                                                                                                                                                                                                                                                                                                                                                                                                                                                                                           |
| <p>["humangutMH0189_GL0040812 [gene] locus=scaffold645_6:2271:3248:+ [Complete] codon-table.11",</p> <p>"humangutO2.UC47-0_GL0056011 [gene] locus=scaffold73615_7:2:979:+ [Lack 5'-end] codon-table.11",</p> <p>"pigPIG-049_GL0071696 [gene] locus=scaffold23465_2:12:989:+ [Complete] codon-table.11",</p> <p>"pigPIG-052_GL0054588 [gene] locus=scaffold129083_2:3793:4770:- [Complete] codon-table.11",</p> <p>"pigBHZ-8B_GL0117323 [gene] locus=scaffold67234_2:1249:2226:- [Complete] codon-table.11",</p> <p>"pigDB-510B_GL0002338 [gene] locus=scaffold165928_2:313:1290:+ [Complete] codon-table.11",</p> <p>"pigEYZ-381B_GL0030405 [gene] locus=scaffold229025_1:2041:3018:- [Complete] codon-table.11",</p> <p>"rumen553_GL0593875_1 [gene] locus=scaffold381191_2:1174:2151:-[Complete]",</p> <p>"cazygi 390522395 gb AFL98126.1  putative glycosylase [Ornithobacterium rhinotracheale DSM 15997]",</p> <p>"cazygi 686513339 gb AIP99884.1  glycosidase [Ornithobacterium rhinotracheale ORT-UMN 88]"</p> |
| <p>["humangutMH0189_GL0046548 [gene] locus=scaffold7166_7:2:871:+ [Lack both ends] codon-table.11"]</p>                                                                                                                                                                                                                                                                                                                                                                                                                                                                                                                                                                                                                                                                                                                                                                                                                                                                                                               |
| <p>["humangutMH0193_GL0151567 [gene] locus=scaffold48753_8:32579:33607:+ [Complete] codon-table.11",</p> <p>"mouse1-2_GL0101011 [gene] locus=scaffold7366_22:5101:6129:- [Complete] codon-table.11",</p> <p>"pigPIG-039_GL0006794 [gene] locus=scaffold172054_1:2742:3770:+ [Complete] codon-table.11",</p> <p>"pigBMZ-17B_GL0086225 [gene] locus=scaffold116002_6:360:1388:+ [Complete] codon-table.11",</p> <p>"rumen554_GL1338143_1 [gene] locus=scaffold1192500_2:1327:2355:+[Complete]",</p> <p>"rumen554_GL2517352_1 [gene] locus=scaffold5297_1:2844:3872:+[Complete]",</p> <p>"rumen555_GL0884603_1 [gene] locus=scaffold199175_1:6769:7797:+[Complete]",</p> <p>"rumen555_GL0998754_1 [gene] locus=scaffold721890_1:29:1057:-[Complete]",</p> <p>"rumen555_GL1367176_1 [gene] locus=scaffold1160883_1:665:1693:+[Complete]",</p> <p>"rumen0081_GL1251027_1 [gene] locus=scaffold1087847_1:2155:3183:+[Complete]",</p>                                                                                        |

|                                                                                                                                                                                                                                                                                                                                                                                                                                                                                                                                                                                                                                                                                                                                                                                                                                                                                                                                                                                                                                                                                                                                                                                                                                                                                                                                                           |
|-----------------------------------------------------------------------------------------------------------------------------------------------------------------------------------------------------------------------------------------------------------------------------------------------------------------------------------------------------------------------------------------------------------------------------------------------------------------------------------------------------------------------------------------------------------------------------------------------------------------------------------------------------------------------------------------------------------------------------------------------------------------------------------------------------------------------------------------------------------------------------------------------------------------------------------------------------------------------------------------------------------------------------------------------------------------------------------------------------------------------------------------------------------------------------------------------------------------------------------------------------------------------------------------------------------------------------------------------------------|
| "rumen100058_GL1134211_1 [gene] locus=scaffold505029_1:124:1152:-[Complete]",<br>"rumen100058_GL1945834_1 [gene] locus=scaffold659282_1:2299:3327:+[Complete]"                                                                                                                                                                                                                                                                                                                                                                                                                                                                                                                                                                                                                                                                                                                                                                                                                                                                                                                                                                                                                                                                                                                                                                                            |
| ["humangutMH0197_GL0162843 [gene] locus=scaffold136207_2:1:846:- [Lack 3'-end] codon-table.11"]                                                                                                                                                                                                                                                                                                                                                                                                                                                                                                                                                                                                                                                                                                                                                                                                                                                                                                                                                                                                                                                                                                                                                                                                                                                           |
| ["humangutMH0197_GL0177559 [gene] locus=scaffold131358_1:737:1219:- [Lack 5'-end] codon-table.11"]                                                                                                                                                                                                                                                                                                                                                                                                                                                                                                                                                                                                                                                                                                                                                                                                                                                                                                                                                                                                                                                                                                                                                                                                                                                        |
| ["humangutMH0212_GL0074415 [gene] locus=scaffold1862_18:1404:2384:+ [Complete] codon-table.11",<br>"mouseS-Fe12_GL0196102 [gene] locus=scaffold7461_11:4473:5453:- [Complete] codon-table.11",<br>"mouseMC-0-1_GL0003086 [gene] locus=scaffold1174_4:278:1258:+ [Complete] codon-table.11",<br>"mouseG1-1A_GL0037566 [gene] locus=scaffold25365_1:33399:34379:- [Complete] codon-table.11",<br>"mouseG1-1A_GL0037586 [gene] locus=scaffold25365_1:64275:65255:- [Complete] codon-table.11",<br>"mouseGroup2-3A_GL0165413 [gene] locus=scaffold107419_1:18570:19550:+ [Complete] codon-table.11",<br>"mouse10_GL0047421 [gene] locus=scaffold62640_2:18278:19258:+ [Complete] codon-table.11",<br>"mouse1_GL0094620 [gene] locus=scaffold11473_4:2802:3782:- [Complete] codon-table.11",<br>"mouse1-2_GL0057476 [gene] locus=scaffold72407_6:6926:7906:+ [Complete] codon-table.11",<br>"mouse2-2_GL0051309 [gene] locus=C1485145_1:93:1073:+ [Complete] codon-table.11",<br>"mouse2-3_GL0096831 [gene] locus=scaffold59790_1:35136:36116:+ [Complete] codon-table.11",<br>"mouse3-6_GL0068398 [gene] locus=scaffold10_2:15787:16767:- [Complete] codon-table.11",<br>"mouse4-8_GL0049572 [gene] locus=scaffold504_4:43675:44655:+ [Complete] codon-table.11",<br>"mouse4-8_GL0076624 [gene] locus=scaffold11068_2:1384:2364:+ [Complete] codon-table.11"] |
| ["humangutMH0220_GL0164069 [gene] locus=scaffold17526_1:58:1047:+ [Complete] codon-table.11",<br>"pigPIG_153_GL0036422 [gene] locus=scaffold32198_1:543:1532:- [Complete] codon-table.11"]                                                                                                                                                                                                                                                                                                                                                                                                                                                                                                                                                                                                                                                                                                                                                                                                                                                                                                                                                                                                                                                                                                                                                                |
| ["humangutMH0245_GL0146682 [gene] locus=scaffold28855_5:2:430:- [Lack 3'-end] codon-table.11"]                                                                                                                                                                                                                                                                                                                                                                                                                                                                                                                                                                                                                                                                                                                                                                                                                                                                                                                                                                                                                                                                                                                                                                                                                                                            |
| ["humangutMH0250_GL0223774 [gene] locus=scaffold13892_12:155:1108:- [Complete] codon-table.11"]                                                                                                                                                                                                                                                                                                                                                                                                                                                                                                                                                                                                                                                                                                                                                                                                                                                                                                                                                                                                                                                                                                                                                                                                                                                           |
| ["humangutMH0260_GL0147700 [gene] locus=scaffold41047_1:82:663:+ [Lack 3'-end] codon-table.11"]                                                                                                                                                                                                                                                                                                                                                                                                                                                                                                                                                                                                                                                                                                                                                                                                                                                                                                                                                                                                                                                                                                                                                                                                                                                           |
| ["humangutMH0262_GL0030555 [gene] locus=scaffold6436_5:1:759:- [Lack 3'-end] codon-table.11"]                                                                                                                                                                                                                                                                                                                                                                                                                                                                                                                                                                                                                                                                                                                                                                                                                                                                                                                                                                                                                                                                                                                                                                                                                                                             |
| ["humangutMH0270_GL0044430 [gene] locus=scaffold20929_2:1244:2299:+ [Complete] codon-table.11"]                                                                                                                                                                                                                                                                                                                                                                                                                                                                                                                                                                                                                                                                                                                                                                                                                                                                                                                                                                                                                                                                                                                                                                                                                                                           |
| ["humangutMH0277_GL0039787 [gene] locus=scaffold19094_1:344:1375:+ [Complete] codon-table.11"]                                                                                                                                                                                                                                                                                                                                                                                                                                                                                                                                                                                                                                                                                                                                                                                                                                                                                                                                                                                                                                                                                                                                                                                                                                                            |
| ["humangutMH0281_GL0131783 [gene] locus=scaffold81319_1:3469:4038:- [Lack 5'-end] codon-table.11",<br>"humangut508703490-stool1_revised_scaffold3467_3_gene28638 strand:- start:12408 stop:12977 length:570 start_codon:no stop_codon:yes gene_type:incomplete [Lack 5'-end] codon-table.11"]                                                                                                                                                                                                                                                                                                                                                                                                                                                                                                                                                                                                                                                                                                                                                                                                                                                                                                                                                                                                                                                             |
| ["humangutMH0287_GL0094017 [gene] locus=scaffold40373_6:109:1140:+ [Complete] codon-table.11",<br>"rumen553_GL0374569_1 [gene] locus=scaffold192374_1:95638:96669:+[Complete]",<br>"rumen554_GL1628264_1 [gene] locus=scaffold2194842_1:215:1246:+[Complete]"                                                                                                                                                                                                                                                                                                                                                                                                                                                                                                                                                                                                                                                                                                                                                                                                                                                                                                                                                                                                                                                                                             |
| ["humangutMH0303_GL0035338 [gene] locus=scaffold35829_14:1:567:- [Lack 3'-end] codon-table.11"]                                                                                                                                                                                                                                                                                                                                                                                                                                                                                                                                                                                                                                                                                                                                                                                                                                                                                                                                                                                                                                                                                                                                                                                                                                                           |
| ["humangutMH0303_GL0118055 [gene] locus=scaffold42008_3:84:1145:- [Complete] codon-table.11",<br>"humangutN038A_GL0019547 [gene] locus=scaffold20313_7:490:1551:- [Lack 5'-end] codon-table.11",<br>"pigPIG-039_GL0000916 [gene] locus=scaffold91017_9:5030:6091:+ [Complete] codon-table.11"]                                                                                                                                                                                                                                                                                                                                                                                                                                                                                                                                                                                                                                                                                                                                                                                                                                                                                                                                                                                                                                                            |
| ["humangutMH0303_GL0199969 [gene] locus=scaffold70592_2:219:1190:- [Complete] codon-table.11"]                                                                                                                                                                                                                                                                                                                                                                                                                                                                                                                                                                                                                                                                                                                                                                                                                                                                                                                                                                                                                                                                                                                                                                                                                                                            |
| ["humangutMH0309_GL0028253 [gene] locus=scaffold6046_3:2:688:+ [Lack 5'-end] codon-table.11"]                                                                                                                                                                                                                                                                                                                                                                                                                                                                                                                                                                                                                                                                                                                                                                                                                                                                                                                                                                                                                                                                                                                                                                                                                                                             |
| ["humangutMH0355_GL0016053 [gene] locus=scaffold148089_2:22:978:- [Complete] codon-table.11",<br>"humangutO2_UC29-1_GL0037523 [gene] locus=scaffold55840_5:1011:1967:- [Complete] codon-table.11"]                                                                                                                                                                                                                                                                                                                                                                                                                                                                                                                                                                                                                                                                                                                                                                                                                                                                                                                                                                                                                                                                                                                                                        |
| ["humangutMH0357_GL0045195 [gene] locus=scaffold18423_10:3:1067:+ [Lack 5'-end] codon-table.11"]                                                                                                                                                                                                                                                                                                                                                                                                                                                                                                                                                                                                                                                                                                                                                                                                                                                                                                                                                                                                                                                                                                                                                                                                                                                          |
| ["humangutMH0369_GL0155294 [gene] locus=scaffold5680_2:3:854:+ [Lack 5'-end] codon-table.11"]                                                                                                                                                                                                                                                                                                                                                                                                                                                                                                                                                                                                                                                                                                                                                                                                                                                                                                                                                                                                                                                                                                                                                                                                                                                             |
| ["humangutMH0381_GL0168056 [gene] locus=scaffold45574_11:1:681:+ [Lack both ends] codon-table.11",                                                                                                                                                                                                                                                                                                                                                                                                                                                                                                                                                                                                                                                                                                                                                                                                                                                                                                                                                                                                                                                                                                                                                                                                                                                        |

|                                                                                                                                                                                                                                                                                                                                                                                                                                                                                                                                                                                                                                                                                                                                                                                                                                                                                                                            |
|----------------------------------------------------------------------------------------------------------------------------------------------------------------------------------------------------------------------------------------------------------------------------------------------------------------------------------------------------------------------------------------------------------------------------------------------------------------------------------------------------------------------------------------------------------------------------------------------------------------------------------------------------------------------------------------------------------------------------------------------------------------------------------------------------------------------------------------------------------------------------------------------------------------------------|
| "rumen554_GL2592698_1 [gene] locus=scaffold1255305_1:2:682:-[Lack 3'-end]",                                                                                                                                                                                                                                                                                                                                                                                                                                                                                                                                                                                                                                                                                                                                                                                                                                                |
| "rumen0081_GL2387199_1 [gene] locus=scaffold1888956_1:3:683:+[Lack both ends]"                                                                                                                                                                                                                                                                                                                                                                                                                                                                                                                                                                                                                                                                                                                                                                                                                                             |
| ["humangutMH0382_GL0091523 [gene] locus=scaffold7953_8:1:663:+ [Lack 5'-end] codon-table.11",<br>"mouseMC-6-5_GL0123570 [gene] locus=scaffold95762_1:1:663:+ [Lack 5'-end] codon-table.11"]                                                                                                                                                                                                                                                                                                                                                                                                                                                                                                                                                                                                                                                                                                                                |
| ["humangutMH0382_GL0154334 [gene] locus=scaffold35103_1:3:716:+ [Lack both ends] codon-table.11"]                                                                                                                                                                                                                                                                                                                                                                                                                                                                                                                                                                                                                                                                                                                                                                                                                          |
| ["humangutMH0387_GL0029039 [gene] locus=scaffold12283_5:6659:7738:- [Complete] codon-table.11"]                                                                                                                                                                                                                                                                                                                                                                                                                                                                                                                                                                                                                                                                                                                                                                                                                            |
| ["humangutMH0397_GL0116910 [gene] locus=scaffold2829_39:1:1077:+ [Lack 5'-end] codon-table.11"]                                                                                                                                                                                                                                                                                                                                                                                                                                                                                                                                                                                                                                                                                                                                                                                                                            |
| ["humangutMH0399_GL0023075 [gene] locus=scaffold120460_2:3:515:+ [Lack both ends] codon-table.11"]                                                                                                                                                                                                                                                                                                                                                                                                                                                                                                                                                                                                                                                                                                                                                                                                                         |
| ["humangutMH0400_GL0110506 [gene] locus=scaffold25753_1:195:1136:- [Lack 5'-end] codon-table.11"]                                                                                                                                                                                                                                                                                                                                                                                                                                                                                                                                                                                                                                                                                                                                                                                                                          |
| ["humangutMH0402_GL0139858 [gene] locus=scaffold153726_2:3:548:- [Lack both ends] codon-table.11"]                                                                                                                                                                                                                                                                                                                                                                                                                                                                                                                                                                                                                                                                                                                                                                                                                         |
| ["humangutMH0407_GL0183292 [gene] locus=scaffold23718_13:1:1041:+ [Lack 5'-end] codon-table.11",<br>"mouse11_GL0083170 [gene] locus=scaffold90279_4:69:1109:- [Lack 5'-end] codon-table.11",<br>"mouse26_GL0143939 [gene] locus=scaffold53671_2:3494:4534:- [Complete] codon-table.11",<br>"mouse4-1_GL0031569 [gene] locus=scaffold29527_1:22919:23959:+ [Complete] codon-table.11",<br>"mouse5-5_GL0084385 [gene] locus=scaffold64478_2:41991:43031:+ [Complete] codon-table.11",<br>"mouse7-5_GL0099091 [gene] locus=scaffold62478_1:4353:5393:- [Complete] codon-table.11",<br>"pigPIG-027_GL0027327 [gene] locus=scaffold49328_8:413:1453:- [Complete] codon-table.11",<br>"rumen552_GL0517601_1 [gene] locus=scaffold11542_8:6907:7947:+[Complete]",<br>"rumen552_GL0987052_1 [gene] locus=scaffold1115340_1:3566:4606:-[Complete]",<br>"rumen100058_GL2046874_1 [gene] locus=scaffold136438_4:162:1202:-[Complete]" |
| ["humangutMH0408_GL0118706 [gene] locus=scaffold127104_3:1542:2570:- [Complete] codon-table.11"]                                                                                                                                                                                                                                                                                                                                                                                                                                                                                                                                                                                                                                                                                                                                                                                                                           |
| ["humangutMH0421_GL0035274 [gene] locus=scaffold54804_5:3:1028:+ [Lack 5'-end] codon-table.11"]                                                                                                                                                                                                                                                                                                                                                                                                                                                                                                                                                                                                                                                                                                                                                                                                                            |
| ["humangutMH0426_GL0018631 [gene] locus=scaffold58191_1:1153:1920:- [Lack 5'-end] codon-table.11"]                                                                                                                                                                                                                                                                                                                                                                                                                                                                                                                                                                                                                                                                                                                                                                                                                         |
| ["humangutMH0428_GL0117452 [gene] locus=scaffold126494_3:20986:22113:- [Complete] codon-table.11"]                                                                                                                                                                                                                                                                                                                                                                                                                                                                                                                                                                                                                                                                                                                                                                                                                         |
| ["humangutMH0429_GL0034838 [gene] locus=scaffold52026_6:723:1685:- [Complete] codon-table.11",<br>"humangut158499257-stool2_revised_scaffold12674_2_gene215003 strand:- start:8453 stop:9415 length:963 start_codon:yes stop_codon:yes gene_type:complete<br>[Complete] codon-table.11",<br>"mouseS-Fe8_GL0093162 [gene] locus=scaffold56129_1:824:1786:- [Lack 5'-end] codon-table.11"]                                                                                                                                                                                                                                                                                                                                                                                                                                                                                                                                   |
| ["humangutMH0431_GL0078633 [gene] locus=scaffold30057_3:617:1462:+ [Lack 3'-end] codon-table.11"]                                                                                                                                                                                                                                                                                                                                                                                                                                                                                                                                                                                                                                                                                                                                                                                                                          |
| ["humangutMH0433_GL0186557 [gene] locus=scaffold28903_3:603:1043:- [Lack 5'-end] codon-table.11"]                                                                                                                                                                                                                                                                                                                                                                                                                                                                                                                                                                                                                                                                                                                                                                                                                          |
| ["humangutMH0437_GL0054517 [gene] locus=scaffold9441_16:2:709:+ [Lack 5'-end] codon-table.11"]                                                                                                                                                                                                                                                                                                                                                                                                                                                                                                                                                                                                                                                                                                                                                                                                                             |
| ["humangutMH0437_GL0254245 [gene] locus=scaffold102268_1:3:722:- [Lack both ends] codon-table.11"]                                                                                                                                                                                                                                                                                                                                                                                                                                                                                                                                                                                                                                                                                                                                                                                                                         |
| ["humangutMH0457_GL0165653 [gene] locus=C2199620_1:3:599:- [Lack 3'-end] codon-table.11"]                                                                                                                                                                                                                                                                                                                                                                                                                                                                                                                                                                                                                                                                                                                                                                                                                                  |
| ["humangutN038A_GL0048650 [gene] locus=C772186_1:1:429:+ [Lack 5'-end] codon-table.11"]                                                                                                                                                                                                                                                                                                                                                                                                                                                                                                                                                                                                                                                                                                                                                                                                                                    |
| ["humangutN038A_GL0106061 [gene] locus=scaffold4397_10:62:679:+ [Lack 3'-end] codon-table.11"]                                                                                                                                                                                                                                                                                                                                                                                                                                                                                                                                                                                                                                                                                                                                                                                                                             |
| ["humangutN051A_GL0044481 [gene] locus=scaffold18856_3:110:532:- [Complete] codon-table.11"]                                                                                                                                                                                                                                                                                                                                                                                                                                                                                                                                                                                                                                                                                                                                                                                                                               |
| ["humangutN066A_GL0107416 [gene] locus=scaffold49167_2:2:640:- [Lack both ends] codon-table.11"]                                                                                                                                                                                                                                                                                                                                                                                                                                                                                                                                                                                                                                                                                                                                                                                                                           |
| ["humangutNLM027_GL0039233 [gene] locus=scaffold31637_3:1001:2026:- [Complete] codon-table.11",<br>"mouseMC-0-1_GL0067499 [gene] locus=scaffold55912_2:86:1111:+ [Complete] codon-table.11",<br>"pigPIG-083_GL0081509 [gene] locus=scaffold168547_2:261:1286:+ [Complete] codon-table.11",<br>"pigEYZ-381B_GL0016318 [gene] locus=scaffold65333_1:521:1546:- [Complete] codon-table.11"]                                                                                                                                                                                                                                                                                                                                                                                                                                                                                                                                   |
| ["humangutNOF008_GL0089493 [gene] locus=scaffold4840_1:146:1087:+ [Lack 3'-end] codon-table.11"]                                                                                                                                                                                                                                                                                                                                                                                                                                                                                                                                                                                                                                                                                                                                                                                                                           |
| ["humangutNOM004_GL0020231 [gene] locus=scaffold632_9:3:617:+ [Lack both ends] codon-table.11"]                                                                                                                                                                                                                                                                                                                                                                                                                                                                                                                                                                                                                                                                                                                                                                                                                            |

|                                                                                                                                                                                                                                                                                                                                                                                       |
|---------------------------------------------------------------------------------------------------------------------------------------------------------------------------------------------------------------------------------------------------------------------------------------------------------------------------------------------------------------------------------------|
| ["humangutO2.UC11-1_GL0089924 [gene] locus=scaffold10588_4:3:536:- [Lack 3'-end] codon-table.11"]                                                                                                                                                                                                                                                                                     |
| ["humangutO2.UC18-1_GL0073107 [gene] locus=scaffold50456_1:32410:33462:- [Lack 5'-end] codon-table.11"]                                                                                                                                                                                                                                                                               |
| ["humangutO2.UC18-1_GL0097081 [gene] locus=C1517119_1:3:509:+ [Lack both ends] codon-table.11"]                                                                                                                                                                                                                                                                                       |
| ["humangutO2.UC18-1_GL0191078 [gene] locus=scaffold112581_1:3530:4207:- [Lack 5'-end] codon-table.11"]                                                                                                                                                                                                                                                                                |
| ["humangutO2.UC19-2_GL0032028 [gene] locus=scaffold42319_8:879:1490:- [Lack 5'-end] codon-table.11"]                                                                                                                                                                                                                                                                                  |
| ["humangutO2.UC20-1_GL0102030 [gene] locus=scaffold57915_1:3920:4432:+ [Complete] codon-table.11",<br>"rumen2009040_GL2485921_1 [gene] locus=scaffold48956_3:2:514:+ [Lack 5'-end]"]                                                                                                                                                                                                  |
| ["humangutO2.UC21-2_GL0080310 [gene] locus=scaffold12179_16:456:956:- [Lack 5'-end] codon-table.11",<br>"pigPIG-007_GL0029642 [gene] locus=scaffold30699_1:3:500:- [Lack both ends] codon-table.11"]                                                                                                                                                                                  |
| ["humangutO2.UC29-0_GL0026334 [gene] locus=scaffold373_4:2:1090:+ [Lack 5'-end] codon-table.11"]                                                                                                                                                                                                                                                                                      |
| ["humangutO2.UC32-1_GL0154626 [gene] locus=scaffold89918_3:1:1059:+ [Lack 5'-end] codon-table.11"]                                                                                                                                                                                                                                                                                    |
| ["humangutO2.UC35-1_GL0065883 [gene] locus=scaffold10493_1:3:641:+ [Lack 5'-end] codon-table.11",<br>"humangutV1.UC50-1_GL0145932 [gene] locus=scaffold94632_3:1:636:+ [Lack both ends] codon-table.11"]                                                                                                                                                                              |
| ["humangutO2.UC35-1_GL0064221 [gene] locus=scaffold35660_15:3:608:- [Lack 3'-end] codon-table.11"]                                                                                                                                                                                                                                                                                    |
| ["humangutO2.UC41-0_GL0021867 [gene] locus=scaffold52570_3:2:727:+ [Lack both ends] codon-table.11"]                                                                                                                                                                                                                                                                                  |
| ["humangutO2.UC41-0_GL0099349 [gene] locus=scaffold35913_2:1:537:- [Lack both ends] codon-table.11"]                                                                                                                                                                                                                                                                                  |
| ["humangutO2.UC47-1_GL0002152 [gene] locus=scaffold52285_1:1032:1538:+ [Lack 3'-end] codon-table.11"]                                                                                                                                                                                                                                                                                 |
| ["humangutO2.UC51-0_GL0092079 [gene] locus=scaffold16611_18:4537:5577:- [Complete] codon-table.11"]                                                                                                                                                                                                                                                                                   |
| ["humangutO2.UC52-0_GL0088588 [gene] locus=C1307293_1:1261:2283:- [Lack 5'-end] codon-table.11"]                                                                                                                                                                                                                                                                                      |
| ["humangutO2.UC60-0_GL0087539 [gene] locus=scaffold43748_3:1:582:- [Lack 3'-end] codon-table.11"]                                                                                                                                                                                                                                                                                     |
| ["humangutO2.UC7-1_GL0177132 [gene] locus=scaffold59965_3:32045:33076:+ [Complete] codon-table.11",<br>"mouse5-7_GL0130853 [gene] locus=scaffold79670_1:2:1033:+ [Lack 5'-end] codon-table.11"]                                                                                                                                                                                       |
| ["humangutO2.UC8-2_GL0064491 [gene] locus=scaffold40685_6:40603:41538:+ [Complete] codon-table.11"]                                                                                                                                                                                                                                                                                   |
| ["humangutSZEY-26A_GL0007821 [gene] locus=scaffold23789_1:37311:38363:- [Complete] codon-table.11",<br>"rumen554_GL2352801_1 [gene] locus=scaffold1127205_3:4361:5413:+ [Complete]"]                                                                                                                                                                                                  |
| ["humangutSZEY-29A_GL0042375 [gene] locus=scaffold917_4:1149:1712:- [Lack 5'-end] codon-table.11"]                                                                                                                                                                                                                                                                                    |
| ["humangutSZEY-69A_GL0007593 [gene] locus=scaffold5091_7:372:986:- [Lack 5'-end] codon-table.11"]                                                                                                                                                                                                                                                                                     |
| ["humangutT2D-157A_GL0045181 [gene] locus=scaffold3295_8:1:807:- [Lack 3'-end] codon-table.11"]                                                                                                                                                                                                                                                                                       |
| ["humangutT2D-33A_GL0105813 [gene] locus=scaffold35838_1:16531:17295:+ [Lack 3'-end] codon-table.11"]                                                                                                                                                                                                                                                                                 |
| ["humangutT2D-35A_GL0004763 [gene] locus=scaffold1796_1:13:1059:- [Complete] codon-table.11",<br>"humangutT2D-41A_GL0104862 [gene] locus=scaffold3972_8:3:1049:+ [Lack 5'-end] codon-table.11",<br>"mouse1-4_GL0037745 [gene] locus=scaffold12922_3:135:1181:+ [Complete] codon-table.11",<br>"mouse5-1_GL0045110 [gene] locus=scaffold12825_7:621:1667:- [Complete] codon-table.11"] |
| ["humangutT2D-48A_GL0079777 [gene] locus=scaffold15415_7:9925:10509:+ [Lack 3'-end] codon-table.11"]                                                                                                                                                                                                                                                                                  |
| ["humangutT2D-51A_GL0027405 [gene] locus=scaffold61679_1:1:429:+ [Lack 5'-end] codon-table.11"]                                                                                                                                                                                                                                                                                       |
| ["humangutT2D-51A_GL0062678 [gene] locus=scaffold91752_1:1:756:+ [Lack 5'-end] codon-table.11"]                                                                                                                                                                                                                                                                                       |
| ["humangutT2D-52A_GL0017199 [gene] locus=scaffold3660_3:3:773:+ [Lack 5'-end] codon-table.11"]                                                                                                                                                                                                                                                                                        |
| ["humangutT2D-62A_GL0022311 [gene] locus=scaffold1006_8:1837:2844:+ [Complete] codon-table.11",<br>"pigPIG-007_GL0212626 [gene] locus=scaffold32192_3:47:1054:- [Complete] codon-table.11"]                                                                                                                                                                                           |
| ["humangutT2D-62A_GL0057777 [gene] locus=scaffold2778_13:3257:4228:+ [Complete] codon-table.11"]                                                                                                                                                                                                                                                                                      |
| ["humangutT2D-76A_GL0073077 [gene] locus=scaffold26895_1:3:620:+ [Lack both ends] codon-table.11"]                                                                                                                                                                                                                                                                                    |
| ["humangutV1.CD15-3_GL0085774 [gene] locus=scaffold15479_34:9712:10683:- [Complete] codon-table.11"]                                                                                                                                                                                                                                                                                  |
| ["humangutV1.CD25-4_GL0009661 [gene] locus=scaffold7865_2:408:902:- [Lack 5'-end] codon-table.11"]                                                                                                                                                                                                                                                                                    |

|                                                                                                                                                                                                                                                                                                                                                                                                                                                                                                                                                                                                                                                                                          |
|------------------------------------------------------------------------------------------------------------------------------------------------------------------------------------------------------------------------------------------------------------------------------------------------------------------------------------------------------------------------------------------------------------------------------------------------------------------------------------------------------------------------------------------------------------------------------------------------------------------------------------------------------------------------------------------|
| ["humangutV1.CD3-0-PN_GL0015918 [gene] locus=scaffold6292_3:3:611:- [Lack 3'-end] codon-table.11"]                                                                                                                                                                                                                                                                                                                                                                                                                                                                                                                                                                                       |
| ["humangutV1.CD30-0_GL0021637 [gene] locus=scaffold43682_3:3:617:- [Lack both ends] codon-table.11"]                                                                                                                                                                                                                                                                                                                                                                                                                                                                                                                                                                                     |
| ["humangutV1.CD42-0_GL0076323 [gene] locus=scaffold3497_11:15799:16815:+ [Complete] codon-table.11"]                                                                                                                                                                                                                                                                                                                                                                                                                                                                                                                                                                                     |
| ["humangutV1.CD55-0_GL0211473 [gene] locus=scaffold70538_3:2:562:+ [Lack both ends] codon-table.11",<br>"rumen554_GL3158057_1 [gene] locus=scaffold1529397_1:1:561:+[Lack both ends]"]                                                                                                                                                                                                                                                                                                                                                                                                                                                                                                   |
| ["humangutV1.FI17_GL0042880 [gene] locus=scaffold78622_5:16482:17477:- [Complete] codon-table.11",<br>"rumen552_GL0555913_1 [gene] locus=scaffold391812_2:2921:3916:-[Complete]"]                                                                                                                                                                                                                                                                                                                                                                                                                                                                                                        |
| ["humangutV1.FI17_GL0215038 [gene] locus=scaffold67174_3:3:758:- [Lack both ends] codon-table.11"]                                                                                                                                                                                                                                                                                                                                                                                                                                                                                                                                                                                       |
| ["humangutV1.FI17_GL0221942 [gene] locus=scaffold8131_3:3:881:+ [Lack 5'-end] codon-table.11"]                                                                                                                                                                                                                                                                                                                                                                                                                                                                                                                                                                                           |
| ["humangutV1.FI28_GL0086913 [gene] locus=scaffold70262_3:1:181:+ [Lack 5'-end] codon-table.11"]                                                                                                                                                                                                                                                                                                                                                                                                                                                                                                                                                                                          |
| ["humangutV1.UC11-5_GL0014111 [gene] locus=scaffold14897_18:201:1238:+ [Complete] codon-table.11",<br>"humangut159753524-stool1_revised_scaffold17260_2_gene39433 strand:+ start:1 stop:1038 length:1038 start_codon:no stop_codon:yes gene_type:incomplete [Lack 5'-end] codon-table.11",<br>"humangutMH0364_GL0058645 [gene] locus=scaffold51576_25:140:1174:+ [Lack 3'-end] codon-table.11",<br>"mouseGroup2-6A_GL0009990 [gene] locus=scaffold5386_5:1097:2134:- [Lack 5'-end] codon-table.11",<br>"mouse20_GL0137763 [gene] locus=scaffold37707_1:7070:8107:- [Complete] codon-table.11",<br>"mouse7-1_GL0034864 [gene] locus=scaffold72_16:6021:7058:+ [Complete] codon-table.11"] |
| ["humangutV1.UC11-5_GL0123810 [gene] locus=scaffold5864_2:2:505:+ [Lack both ends] codon-table.11",<br>"pigPIG_151_GL0280216 [gene] locus=scaffold280443_1:2:505:- [Lack both ends] codon-table.11"]                                                                                                                                                                                                                                                                                                                                                                                                                                                                                     |
| ["humangutV1.UC11-5_GL0195187 [gene] locus=scaffold85150_3:2:739:+ [Lack 5'-end] codon-table.11",<br>"mouse7-2_GL0041940 [gene] locus=scaffold35517_6:81:818:- [Complete] codon-table.11"]                                                                                                                                                                                                                                                                                                                                                                                                                                                                                               |
| ["humangutV1.UC16-0_GL0069329 [gene] locus=scaffold16876_1:2:670:- [Lack 3'-end] codon-table.11"]                                                                                                                                                                                                                                                                                                                                                                                                                                                                                                                                                                                        |
| ["humangutV1.UC17-2_GL0015894 [gene] locus=scaffold28094_1:1:660:+ [Lack both ends] codon-table.11"]                                                                                                                                                                                                                                                                                                                                                                                                                                                                                                                                                                                     |
| ["humangutV1.UC17-2_GL0083726 [gene] locus=scaffold41122_4:2:649:- [Lack 3'-end] codon-table.11",<br>"rumen3042_GL0504186_1 [gene] locus=scaffold223018_2:3:650:+[Lack both ends]"]                                                                                                                                                                                                                                                                                                                                                                                                                                                                                                      |
| ["humangutV1.UC38-4_GL0166133 [gene] locus=scaffold21280_8:12277:13332:- [Complete] codon-table.11",<br>"mouse2-3_GL0031396 [gene] locus=scaffold235_3:6008:7063:- [Complete] codon-table.11",<br>"pigPIG-065_GL0007788 [gene] locus=scaffold15243_8:454:1509:+ [Complete] codon-table.11",<br>"rumen553_GL0553273_1 [gene] locus=C7637698_1:538:1593:-[Complete]",<br>"rumen100058_GL3245499_1 [gene] locus=scaffold608862_5:1049:2104:+[Complete]"]                                                                                                                                                                                                                                    |
| ["humangutV1.UC40-1_GL0067979 [gene] locus=scaffold56606_4:2:427:+ [Lack 5'-end] codon-table.11"]                                                                                                                                                                                                                                                                                                                                                                                                                                                                                                                                                                                        |
| ["humangutV1.UC51-0_GL0038735 [gene] locus=scaffold18193_46:8332:8898:- [Lack 5'-end] codon-table.11"]                                                                                                                                                                                                                                                                                                                                                                                                                                                                                                                                                                                   |
| ["humangutV1.UC54-0_GL0149599 [gene] locus=scaffold7166_6:3402:4475:+ [Complete] codon-table.11",<br>"humangut160765029-stool1_revised_C1097260_1_gene98143 strand:- start:1314 stop:2387 length:1074 start_codon:no stop_codon:yes gene_type:incomplete [Lack 5'-end] codon-table.11",<br>"rumen583_GL0668725_1 [gene] locus=scaffold85441_1:1:1071:+[Lack both ends]"]                                                                                                                                                                                                                                                                                                                 |
| ["humangutV1.UC6-0_GL0083590 [gene] locus=scaffold85180_1:82:786:- [Lack 5'-end] codon-table.11"]                                                                                                                                                                                                                                                                                                                                                                                                                                                                                                                                                                                        |
| ["mouse1-1_GL0013755 [gene] locus=scaffold85905_2:3182:4222:- [Complete] codon-table.11"]                                                                                                                                                                                                                                                                                                                                                                                                                                                                                                                                                                                                |
| ["mouse1-1_GL0124139 [gene] locus=scaffold12413_10:656:1843:- [Lack 5'-end] codon-table.11"]                                                                                                                                                                                                                                                                                                                                                                                                                                                                                                                                                                                             |
| ["mouse1-6_GL0082804 [gene] locus=scaffold37174_4:1031:2068:- [Complete] codon-table.11"]                                                                                                                                                                                                                                                                                                                                                                                                                                                                                                                                                                                                |
| ["mouse11_GL0028995 [gene] locus=scaffold80892_2:3:602:+ [Lack both ends] codon-table.11"]                                                                                                                                                                                                                                                                                                                                                                                                                                                                                                                                                                                               |
| ["mouse11_GL0063366 [gene] locus=scaffold67069_1:2766:3758:+ [Complete] codon-table.11",<br>"mouse1-2_GL0086073 [gene] locus=scaffold17958_3:18710:19702:+ [Complete] codon-table.11",                                                                                                                                                                                                                                                                                                                                                                                                                                                                                                   |

|                                                                                                     |
|-----------------------------------------------------------------------------------------------------|
| "mouse1-7_GL0031690 [gene] locus=scaffold77452_1:314:1306:+ [Complete] codon-table.11",             |
| "mouse1A-dyr4-07_GL0101500 [gene] locus=scaffold13481_1:1287:2279:+ [Complete] codon-table.11",     |
| "mouse8-1_GL0054971 [gene] locus=scaffold2906_5:2179:3171:- [Complete] codon-table.11",             |
| "cazygii690621879 gb AIQ22893.1  glycosidase [Paenibacillus sp. FSL H7-0737]",                      |
| "cazygii686524044 gb AIQ34744.1  glycosidase [Paenibacillus sp. FSL R5-0345]"                       |
| ["mouse13_GL0064072 [gene] locus=scaffold51821_1:22792:23754:+ [Complete] codon-table.11"]          |
| ["mouse14_GL0107550 [gene] locus=scaffold6028_2:1017:2039:- [Complete] codon-table.11"]             |
| ["mouse17_GL0087175 [gene] locus=scaffold73438_2:156:1256:- [Complete] codon-table.11"]             |
| ["mouse1A-dyr4-07_GL0070334 [gene] locus=scaffold24038_1:2442:2900:- [Lack 5'-end] codon-table.11", |
| "pigBHZ-5B_GL0086327 [gene] locus=scaffold167485_1:49:507:- [Lack 5'-end] codon-table.11"]          |
| ["mouse2-2_GL0079470 [gene] locus=scaffold81255_3:3302:4174:+ [Lack 3'-end] codon-table.11",        |
| "pigPIG_155_GL0209038 [gene] locus=scaffold258678_1:3:875:- [Lack 3'-end] codon-table.11"]          |
| ["mouse2-2_GL0122780 [gene] locus=scaffold34208_4:2:757:+ [Lack both ends] codon-table.11"]         |
| ["mouse20_GL0026050 [gene] locus=scaffold37937_1:3648:4634:- [Complete] codon-table.11"]            |
| ["mouse20_GL0131442 [gene] locus=scaffold21671_4:3:599:- [Lack both ends] codon-table.11"]          |
| ["mouse23_GL0035436 [gene] locus=scaffold62600_1:458:1582:- [Lack 5'-end] codon-table.11"]          |
| ["mouse26_GL0130784 [gene] locus=scaffold14459_3:153:1250:- [Complete] codon-table.11"]             |
| ["mouse28_GL0074759 [gene] locus=scaffold13983_10:1:546:+ [Lack 5'-end] codon-table.11"]            |
| ["mouse2A-dyr16-07_GL0072185 [gene] locus=scaffold23927_13:1555:2616:- [Complete] codon-table.11"]  |
| ["mouse38_GL0056566 [gene] locus=scaffold16483_4:837:1883:- [Complete] codon-table.11"]             |
| ["mouse40_GL0009374 [gene] locus=scaffold1596_9:2465:3433:+ [Complete] codon-table.11"]             |
| ["mouse40_GL0036592 [gene] locus=scaffold17608_2:3:938:- [Lack 3'-end] codon-table.11"]             |
| ["mouse47_GL0008624 [gene] locus=scaffold12137_4:1:591:- [Lack both ends] codon-table.11"]          |
| ["mouse5-2_GL0036463 [gene] locus=scaffold16925_6:2:643:- [Lack both ends] codon-table.11"]         |
| ["mouse5-4_GL0061663 [gene] locus=scaffold47002_2:1:795:- [Lack both ends] codon-table.11"]         |
| ["mouse5-7_GL0065173 [gene] locus=scaffold105587_1:3:479:+ [Lack 5'-end] codon-table.11"]           |
| ["mouse5-8_GL0077583 [gene] locus=scaffold31802_12:3:470:+ [Lack 5'-end] codon-table.11",           |
| "rumen0081_GL0373187_1 [gene] locus=scaffold1486689_1:292:759:-[Lack 5'-end]"                       |
| ["mouse5-8_GL0080354 [gene] locus=scaffold38327_13:1995:2663:+ [Complete] codon-table.11"]          |
| ["mouse6-1_GL0098890 [gene] locus=scaffold1798_5:24648:25709:- [Complete] codon-table.11"]          |
| ["mouse6-3_GL0001548 [gene] locus=scaffold329_1:290:1285:- [Complete] codon-table.11"]              |
| ["mouse6-3_GL0021301 [gene] locus=scaffold89548_2:2:595:- [Lack 3'-end] codon-table.11"]            |
| ["mouse7-8_GL0159389 [gene] locus=scaffold22039_7:1225:2124:- [Lack 5'-end] codon-table.11"]        |
| ["mouse7_GL0111132 [gene] locus=scaffold6113_2:616:1116:+ [Lack 3'-end] codon-table.11"]            |
| ["mouse8-2_GL0132087 [gene] locus=scaffold59387_2:2:526:- [Lack 3'-end] codon-table.11"]            |
| ["mouse8-3_GL0115173 [gene] locus=scaffold18104_20:2364:3515:- [Complete] codon-table.11"]          |
| ["mouse8-5_GL0049588 [gene] locus=scaffold20343_6:934:1881:- [Lack 5'-end] codon-table.11"]         |
| ["mouse8-7_GL0086857 [gene] locus=scaffold38404_2:3:635:- [Lack both ends] codon-table.11"]         |
| ["mouseG1-1A_GL0083748 [gene] locus=scaffold66057_3:8:1012:- [Complete] codon-table.11",            |
| "mouse2-1_GL0074983 [gene] locus=scaffold6325_1:94196:95200:+ [Complete] codon-table.11",           |
| "mouse2-5_GL0040801 [gene] locus=scaffold43826_2:2876:3880:- [Complete] codon-table.11",            |
| "mouse29_GL0069267 [gene] locus=scaffold57287_3:6072:7076:+ [Complete] codon-table.11",             |
| "pigPIG_196_GL0134022 [gene] locus=scaffold117271_4_1:123:1127:+ [Complete] codon-table.11",        |



|                                                                                                                                                                                                                                                                                                                                                                                                                                                                                                                                                                                                                                                       |
|-------------------------------------------------------------------------------------------------------------------------------------------------------------------------------------------------------------------------------------------------------------------------------------------------------------------------------------------------------------------------------------------------------------------------------------------------------------------------------------------------------------------------------------------------------------------------------------------------------------------------------------------------------|
| "pigPIG-006_GL0197673 [gene] locus=scaffold106067_7:3442:4446:- [Complete] codon-table.11"                                                                                                                                                                                                                                                                                                                                                                                                                                                                                                                                                            |
| "mouseG1-3A_GL0113050 [gene] locus=scaffold77102_3:277:1383:- [Complete] codon-table.11"                                                                                                                                                                                                                                                                                                                                                                                                                                                                                                                                                              |
| "mouseG1-4A_GL0100224 [gene] locus=C689339_1:2:538:- [Lack both ends] codon-table.11"                                                                                                                                                                                                                                                                                                                                                                                                                                                                                                                                                                 |
| "mouseG1-5A_GL0021287 [gene] locus=scaffold10354_4:9023:10015:+ [Complete] codon-table.11"                                                                                                                                                                                                                                                                                                                                                                                                                                                                                                                                                            |
| "mouseG1-5A_GL0171673 [gene] locus=scaffold128990_1:3:500:- [Lack 3'-end] codon-table.11"                                                                                                                                                                                                                                                                                                                                                                                                                                                                                                                                                             |
| "mouseG1-6A_GL0009418 [gene] locus=scaffold1871_1:60:500:- [Lack 5'-end] codon-table.11",<br>"pigPIG_122_GL0065820 [gene] locus=scaffold1943_2:737:1177:- [Lack 5'-end] codon-table.11"                                                                                                                                                                                                                                                                                                                                                                                                                                                               |
| "mouseG1-6A_GL0009419 [gene] locus=scaffold1871_2:1:477:- [Lack 3'-end] codon-table.11"                                                                                                                                                                                                                                                                                                                                                                                                                                                                                                                                                               |
| "mouseG1-6A_GL0023704 [gene] locus=scaffold9642_9:2458:3471:+ [Complete] codon-table.11",<br>"mouseGroup2-3A_GL0194463 [gene] locus=scaffold125876_2:59483:60496:- [Complete] codon-table.11",<br>"mouse2-2_GL0096018 [gene] locus=scaffold90474_7:388:1401:+ [Complete] codon-table.11",<br>"mouse6-3_GL0066399 [gene] locus=scaffold85639_4:36:1049:+ [Complete] codon-table.11",<br>"mouse7-5_GL0122105 [gene] locus=scaffold31774_1:31:1044:+ [Complete] codon-table.11",<br>"pigPIG_142_GL0319933 [gene] locus=scaffold239052_8:2400:3413:- [Complete] codon-table.11",<br>"rumen555_GL1093153_1 [gene] locus=C29059764_1:1:1014:+[Lack 5'-end]" |
| "mouseG1-7A_GL0109682 [gene] locus=scaffold79261_2:2:931:- [Lack 3'-end] codon-table.11"                                                                                                                                                                                                                                                                                                                                                                                                                                                                                                                                                              |
| "mouseG1-7A_GL0121857 [gene] locus=scaffold88864_13:2:901:+ [Lack 5'-end] codon-table.11"                                                                                                                                                                                                                                                                                                                                                                                                                                                                                                                                                             |
| "mouseGroup2-1A_GL0050661 [gene] locus=scaffold32594_1:1:729:- [Lack both ends] codon-table.11"                                                                                                                                                                                                                                                                                                                                                                                                                                                                                                                                                       |
| "mouseGroup2-2A_GL0066926 [gene] locus=scaffold43669_1:1:729:- [Lack 3'-end] codon-table.11"                                                                                                                                                                                                                                                                                                                                                                                                                                                                                                                                                          |
| "mouseGroup2-2A_GL0140754 [gene] locus=scaffold107841_2:3:560:- [Lack both ends] codon-table.11"                                                                                                                                                                                                                                                                                                                                                                                                                                                                                                                                                      |
| "mouseGroup2-3A_GL0026302 [gene] locus=scaffold9194_7:1780:2775:- [Lack 5'-end] codon-table.11"                                                                                                                                                                                                                                                                                                                                                                                                                                                                                                                                                       |
| "mouseGroup2-3A_GL0028504 [gene] locus=scaffold10358_2:1:972:- [Lack 3'-end] codon-table.11",<br>"mouseGroup2-8A_GL0007280 [gene] locus=scaffold1536_16:1:972:- [Lack 3'-end] codon-table.11"                                                                                                                                                                                                                                                                                                                                                                                                                                                         |
| "mouseGroup2-3A_GL0155033 [gene] locus=scaffold97533_1:1:705:+ [Lack both ends] codon-table.11"                                                                                                                                                                                                                                                                                                                                                                                                                                                                                                                                                       |
| "mouseGroup2-8A_GL0028085 [gene] locus=scaffold15469_8:470:1015:+ [Lack 3'-end] codon-table.11"                                                                                                                                                                                                                                                                                                                                                                                                                                                                                                                                                       |
| "mouseGroup2-8A_GL0040043 [gene] locus=scaffold24786_2:2:571:+ [Lack both ends] codon-table.11"                                                                                                                                                                                                                                                                                                                                                                                                                                                                                                                                                       |
| "mouseMC-0-1_GL0020728 [gene] locus=scaffold15693_7:1:957:+ [Lack 5'-end] codon-table.11"                                                                                                                                                                                                                                                                                                                                                                                                                                                                                                                                                             |
| "mouseMC-0-1_GL0063972 [gene] locus=scaffold52426_6:1437:2447:- [Complete] codon-table.11",<br>"rumen0081_GL1464453_1 [gene] locus=scaffold1139643_1:2:1012:+[Lack 5'-end]"                                                                                                                                                                                                                                                                                                                                                                                                                                                                           |
| "mouseMC-0-1_GL0070811 [gene] locus=scaffold59537_2:3388:4452:+ [Complete] codon-table.11"                                                                                                                                                                                                                                                                                                                                                                                                                                                                                                                                                            |
| "mouseMC-0-1_GL0105217 [gene] locus=scaffold93234_4:2:940:+ [Lack 5'-end] codon-table.11"                                                                                                                                                                                                                                                                                                                                                                                                                                                                                                                                                             |
| "mouseMC-0-1_GL0126465 [gene] locus=C1203236_1:376:1380:- [Complete] codon-table.11",<br>"rumen555_GL0706695_1 [gene] locus=scaffold1082947_1:604:1608:+[Complete]"                                                                                                                                                                                                                                                                                                                                                                                                                                                                                   |
| "mouseMC-0-3_GL0052777 [gene] locus=scaffold38783_2:179:1198:+ [Complete] codon-table.11"                                                                                                                                                                                                                                                                                                                                                                                                                                                                                                                                                             |
| "mouseMC-0-3_GL0063232 [gene] locus=scaffold48149_4:3475:4386:+ [Complete] codon-table.11",<br>"pigPIG-006_GL0214877 [gene] locus=scaffold176505_2:493:1404:+ [Complete] codon-table.11"                                                                                                                                                                                                                                                                                                                                                                                                                                                              |
| "mouseMC-6-2_GL0114086 [gene] locus=scaffold89911_3:2230:2691:- [Lack 5'-end] codon-table.11"                                                                                                                                                                                                                                                                                                                                                                                                                                                                                                                                                         |
| "mouseMC-6-2_GL0145123 [gene] locus=scaffold117289_1:3:842:+ [Lack 5'-end] codon-table.11",<br>"rumen100058_GL1632487_1 [gene] locus=scaffold2307440_2:366:1205:-[Lack 5'-end]",<br>"rumen2009040_GL1107729_1 [gene] locus=scaffold1102455_2:1:840:+[Lack 5'-end]"                                                                                                                                                                                                                                                                                                                                                                                    |
| "mouseMC-6-2_GL0179822 [gene] locus=scaffold132865_1:10272:11327:+ [Complete] codon-table.11",<br>"rumen554_GL3065378_1 [gene] locus=scaffold2055200_2:19498:20553:+[Complete]"                                                                                                                                                                                                                                                                                                                                                                                                                                                                       |
| "mouseMC-6-2_GL0183036 [gene] locus=scaffold132992_1:101978:103096:+ [Complete] codon-table.11"                                                                                                                                                                                                                                                                                                                                                                                                                                                                                                                                                       |

|                                                                                                                                                                                                                                                                                                                                                                                                                                                                                                                                                                                                                                                                                                                                                                                                                                                                                                                                                                                                                                                                                                                                                                                                                                                                  |
|------------------------------------------------------------------------------------------------------------------------------------------------------------------------------------------------------------------------------------------------------------------------------------------------------------------------------------------------------------------------------------------------------------------------------------------------------------------------------------------------------------------------------------------------------------------------------------------------------------------------------------------------------------------------------------------------------------------------------------------------------------------------------------------------------------------------------------------------------------------------------------------------------------------------------------------------------------------------------------------------------------------------------------------------------------------------------------------------------------------------------------------------------------------------------------------------------------------------------------------------------------------|
| ["mouseMC-6-3_GL0104116 [gene] locus=scaffold78176_1:1:513:+ [Lack both ends] codon-table.11"]                                                                                                                                                                                                                                                                                                                                                                                                                                                                                                                                                                                                                                                                                                                                                                                                                                                                                                                                                                                                                                                                                                                                                                   |
| ["mouseMH-6-3_GL0039014 [gene] locus=scaffold22789_5:1:1026:+ [Lack 5'-end] codon-table.11"]                                                                                                                                                                                                                                                                                                                                                                                                                                                                                                                                                                                                                                                                                                                                                                                                                                                                                                                                                                                                                                                                                                                                                                     |
| ["mouseMH-6-5_GL0037067 [gene] locus=scaffold21339_2:14:574:- [Lack 5'-end] codon-table.11"]                                                                                                                                                                                                                                                                                                                                                                                                                                                                                                                                                                                                                                                                                                                                                                                                                                                                                                                                                                                                                                                                                                                                                                     |
| ["mouseS-Fe10_GL0046194 [gene] locus=scaffold3537_5:349:1317:- [Complete] codon-table.11",<br>"pigEYZ-120B_GL0303698 [gene] locus=scaffold14900_6:149:1117:- [Complete] codon-table.11"]                                                                                                                                                                                                                                                                                                                                                                                                                                                                                                                                                                                                                                                                                                                                                                                                                                                                                                                                                                                                                                                                         |
| ["mouseS-Fe12_GL0052729 [gene] locus=scaffold2727_5:484:1566:+ [Complete] codon-table.11",<br>"rumen555_GL1460227_1 [gene] locus=scaffold1378456_1:15028:16110:+[Complete]"]                                                                                                                                                                                                                                                                                                                                                                                                                                                                                                                                                                                                                                                                                                                                                                                                                                                                                                                                                                                                                                                                                     |
| ["mouseS-Fe12_GL0146061 [gene] locus=scaffold79297_6:336:1319:+ [Complete] codon-table.11"]                                                                                                                                                                                                                                                                                                                                                                                                                                                                                                                                                                                                                                                                                                                                                                                                                                                                                                                                                                                                                                                                                                                                                                      |
| ["mouseS-Fe12_GL0191054 [gene] locus=scaffold7461_20:1732:2280:- [Complete] codon-table.11"]                                                                                                                                                                                                                                                                                                                                                                                                                                                                                                                                                                                                                                                                                                                                                                                                                                                                                                                                                                                                                                                                                                                                                                     |
| ["mouseS-Fe20_GL0180053 [gene] locus=scaffold102347_1:25922:26662:- [Complete] codon-table.11"]                                                                                                                                                                                                                                                                                                                                                                                                                                                                                                                                                                                                                                                                                                                                                                                                                                                                                                                                                                                                                                                                                                                                                                  |
| ["mouseS-Fe3_GL0010927 [gene] locus=scaffold99806_5:1174:1887:+ [Lack 3'-end] codon-table.11"]                                                                                                                                                                                                                                                                                                                                                                                                                                                                                                                                                                                                                                                                                                                                                                                                                                                                                                                                                                                                                                                                                                                                                                   |
| ["mouseS-Fe6_GL0105173 [gene] locus=scaffold109628_5:2:685:- [Lack both ends] codon-table.11"]                                                                                                                                                                                                                                                                                                                                                                                                                                                                                                                                                                                                                                                                                                                                                                                                                                                                                                                                                                                                                                                                                                                                                                   |
| ["mouseS-Fe6_GL0106658 [gene] locus=scaffold60443_2:576:1382:+ [Lack 3'-end] codon-table.11",<br>"rumen554_GL2325094_1 [gene] locus=scaffold1503866_3:1:807:-[Lack 3'-end]"]                                                                                                                                                                                                                                                                                                                                                                                                                                                                                                                                                                                                                                                                                                                                                                                                                                                                                                                                                                                                                                                                                     |
| ["mouseS-Fe8_GL0203068 [gene] locus=scaffold59716_1:487:1332:- [Lack 5'-end] codon-table.11"]                                                                                                                                                                                                                                                                                                                                                                                                                                                                                                                                                                                                                                                                                                                                                                                                                                                                                                                                                                                                                                                                                                                                                                    |
| ["mouseS-Fe9_GL0153613 [gene] locus=scaffold46730_4:3:530:- [Lack both ends] codon-table.11"]                                                                                                                                                                                                                                                                                                                                                                                                                                                                                                                                                                                                                                                                                                                                                                                                                                                                                                                                                                                                                                                                                                                                                                    |
| ["mouseS-Fe9_GL0294675 [gene] locus=scaffold15614_7:2:487:- [Lack 3'-end] codon-table.11"]                                                                                                                                                                                                                                                                                                                                                                                                                                                                                                                                                                                                                                                                                                                                                                                                                                                                                                                                                                                                                                                                                                                                                                       |
| ["pigBHZ-11B_GL0083249 [gene] locus=scaffold60694_4:3219:4214:- [Lack 5'-end] codon-table.11"]                                                                                                                                                                                                                                                                                                                                                                                                                                                                                                                                                                                                                                                                                                                                                                                                                                                                                                                                                                                                                                                                                                                                                                   |
| ["pigBHZ-11B_GL0090194 [gene] locus=scaffold167910_1:1:477:- [Lack 3'-end] codon-table.11"]                                                                                                                                                                                                                                                                                                                                                                                                                                                                                                                                                                                                                                                                                                                                                                                                                                                                                                                                                                                                                                                                                                                                                                      |
| ["pigBHZ-4B_GL0090287 [gene] locus=scaffold91530_1:3532:3927:- [Lack 5'-end] codon-table.11"]                                                                                                                                                                                                                                                                                                                                                                                                                                                                                                                                                                                                                                                                                                                                                                                                                                                                                                                                                                                                                                                                                                                                                                    |
| ["pigBHZ-5B_GL0033276 [gene] locus=scaffold209243_3:253:777:- [Lack 5'-end] codon-table.11"]                                                                                                                                                                                                                                                                                                                                                                                                                                                                                                                                                                                                                                                                                                                                                                                                                                                                                                                                                                                                                                                                                                                                                                     |
| ["pigBHZ-5B_GL0222855 [gene] locus=scaffold171737_1:1:516:- [Lack both ends] codon-table.11"]                                                                                                                                                                                                                                                                                                                                                                                                                                                                                                                                                                                                                                                                                                                                                                                                                                                                                                                                                                                                                                                                                                                                                                    |
| ["pigBHZ-7B_GL0204072 [gene] locus=scaffold187695_2:622:1620:+ [Lack 3'-end] codon-table.11"]                                                                                                                                                                                                                                                                                                                                                                                                                                                                                                                                                                                                                                                                                                                                                                                                                                                                                                                                                                                                                                                                                                                                                                    |
| ["pigBHZ-8B_GL0096113 [gene] locus=scaffold33234_10:68:1132:- [Lack 5'-end] codon-table.11"]                                                                                                                                                                                                                                                                                                                                                                                                                                                                                                                                                                                                                                                                                                                                                                                                                                                                                                                                                                                                                                                                                                                                                                     |
| ["pigBHZ-9B_GL0066795 [gene] locus=scaffold53814_9:454:1419:+ [Complete] codon-table.11"]                                                                                                                                                                                                                                                                                                                                                                                                                                                                                                                                                                                                                                                                                                                                                                                                                                                                                                                                                                                                                                                                                                                                                                        |
| ["pigBMZ-10B_GL0005454 [gene] locus=scaffold66908_2:21139:22158:+ [Complete] codon-table.11",<br>"rumen553_GL0321377_1 [gene] locus=scaffold253522_1:14226:15245:+[Complete]",<br>"rumen553_GL0574790_1 [gene] locus=scaffold263575_1:107:1126:-[Complete]",<br>"rumen552_GL0518438_1 [gene] locus=scaffold185440_2:1369:2388:-[Complete]",<br>"rumen583_GL0485454_1 [gene] locus=scaffold13822_4:1175:2194:+[Complete]",<br>"rumen554_GL1280625_1 [gene] locus=scaffold1336613_1:19824:20843:+[Complete]",<br>"rumen554_GL1777955_1 [gene] locus=scaffold469779_2:1378:2397:-[Complete]",<br>"rumen554_GL2189559_1 [gene] locus=scaffold1422874_1:106:1125:-[Complete]",<br>"rumen555_GL1086794_1 [gene] locus=scaffold394634_1:2:1018:-[Lack 3'-end]",<br>"rumen0081_GL1505816_1 [gene] locus=scaffold1429322_1:1721:2740:-[Complete]",<br>"rumen100058_GL0992048_1 [gene] locus=scaffold502394_6:1940:2959:-[Complete]",<br>"rumen100058_GL1184422_1 [gene] locus=scaffold2318530_1:319:1338:-[Complete]",<br>"rumen2009040_GL0195154_1 [gene] locus=scaffold2145838_6:498:1517:-[Complete]",<br>"rumen3042_GL0591221_1 [gene] locus=scaffold537693_2:1578:2597:+[Complete]",<br>"rumen7049_GL2859710_1 [gene] locus=scaffold1193541_1:296:1315:-[Complete]"] |
| ["pigBMZ-17B_GL0041107 [gene] locus=scaffold170850_1:1:696:+ [Lack 5'-end] codon-table.11"]                                                                                                                                                                                                                                                                                                                                                                                                                                                                                                                                                                                                                                                                                                                                                                                                                                                                                                                                                                                                                                                                                                                                                                      |
| ["pigBMZ-17B_GL0114194 [gene] locus=scaffold32995_1:2:565:+ [Lack both ends] codon-table.11"]                                                                                                                                                                                                                                                                                                                                                                                                                                                                                                                                                                                                                                                                                                                                                                                                                                                                                                                                                                                                                                                                                                                                                                    |
| ["pigBMZ-17B_GL0171035 [gene] locus=scaffold102262_4:1:756:+ [Lack 5'-end] codon-table.11"]                                                                                                                                                                                                                                                                                                                                                                                                                                                                                                                                                                                                                                                                                                                                                                                                                                                                                                                                                                                                                                                                                                                                                                      |

|                                                                                                                                                                                                                                                                                                                                                                                                                                       |
|---------------------------------------------------------------------------------------------------------------------------------------------------------------------------------------------------------------------------------------------------------------------------------------------------------------------------------------------------------------------------------------------------------------------------------------|
| ["pigBMZ-7B_GL0005440 [gene] locus=scaffold27109_1:2:733:+ [Lack both ends] codon-table.11"]                                                                                                                                                                                                                                                                                                                                          |
| ["pigBMZ-9B_GL0017818 [gene] locus=scaffold6417_5:2:457:- [Lack 3'-end] codon-table.11"]                                                                                                                                                                                                                                                                                                                                              |
| ["pigDB-510B_GL0116829 [gene] locus=scaffold4072_1:460:1323:- [Lack 5'-end] codon-table.11"]                                                                                                                                                                                                                                                                                                                                          |
| ["pigDB-510B_GL0203636 [gene] locus=scaffold133867_4:1064:1780:+ [Lack 3'-end] codon-table.11"]                                                                                                                                                                                                                                                                                                                                       |
| ["pigDB-512B_GL0130519 [gene] locus=scaffold23936_1:1:717:+ [Lack 5'-end] codon-table.11"]                                                                                                                                                                                                                                                                                                                                            |
| ["pigDB-537B_GL0180315 [gene] locus=scaffold29432_7:468:1436:- [Complete] codon-table.11"]                                                                                                                                                                                                                                                                                                                                            |
| ["pigEYZ-120B_GL0313316 [gene] locus=scaffold188948_5:575:1540:- [Complete] codon-table.11"]                                                                                                                                                                                                                                                                                                                                          |
| ["pigEYZ-254B_GL0131965 [gene] locus=scaffold15125_3:2:730:- [Lack 3'-end] codon-table.11"]                                                                                                                                                                                                                                                                                                                                           |
| ["pigEYZ-353B_GL0258768 [gene] locus=scaffold172929_2:1:759:- [Lack both ends] codon-table.11"]                                                                                                                                                                                                                                                                                                                                       |
| ["pigEYZ-378B_GL0004433 [gene] locus=scaffold60190_1:2888:3583:+ [Lack 3'-end] codon-table.11",<br>"rumen0081_GL1024715_1 [gene] locus=scaffold922929_2:3:698:-[Lack 3'-end]"]                                                                                                                                                                                                                                                        |
| ["pigEYZ-381B_GL0306685 [gene] locus=scaffold205698_2:2:817:+ [Lack both ends] codon-table.11"]                                                                                                                                                                                                                                                                                                                                       |
| ["pigEYZ-468B_GL0069605 [gene] locus=scaffold76583_2:2:601:+ [Lack 5'-end] codon-table.11",<br>"rumen0081_GL2416987_1 [gene] locus=scaffold845286_7:2:601:+[Lack 5'-end]"]                                                                                                                                                                                                                                                            |
| ["pigPIG-001_GL0169555 [gene] locus=scaffold31187_9:3604:4605:+ [Lack 3'-end] codon-table.11",<br>"rumen100058_GL0132315_1 [gene] locus=scaffold1516124_2:479:1483:-[Lack 5'-end]",<br>"rumen100058_GL2269814_1 [gene] locus=scaffold4654_2:3:1004:-[Lack 3'-end]",<br>"rumen3042_GL1490754_1 [gene] locus=scaffold542093_2:421:1422:+[Lack 3'-end]",<br>"rumen3042_GL1972449_1 [gene] locus=scaffold470323_8:2140:3144:-[Complete]"] |
| ["pigPIG-001_GL0228666 [gene] locus=scaffold122346_4:1:851:+ [Lack both ends] codon-table.11"]                                                                                                                                                                                                                                                                                                                                        |
| ["pigPIG-004_GL0019300 [gene] locus=scaffold96885_3:3242:4357:- [Lack 5'-end] codon-table.11"]                                                                                                                                                                                                                                                                                                                                        |
| ["pigPIG-005_GL0153503 [gene] locus=scaffold121017_1:313:954:+ [Lack 3'-end] codon-table.11"]                                                                                                                                                                                                                                                                                                                                         |
| ["pigPIG-006_GL0112184 [gene] locus=scaffold122780_1:3:542:+ [Lack both ends] codon-table.11",<br>"rumen2009040_GL2275139_1 [gene] locus=scaffold1696944_1:1:540:-[Lack both ends]"]                                                                                                                                                                                                                                                  |
| ["pigPIG-011_GL0150563 [gene] locus=scaffold44416_1:38:514:- [Lack 5'-end] codon-table.11"]                                                                                                                                                                                                                                                                                                                                           |
| ["pigPIG-017_GL0093868 [gene] locus=scaffold147351_9:1:645:+ [Lack 5'-end] codon-table.11"]                                                                                                                                                                                                                                                                                                                                           |
| ["pigPIG-018_GL0091264 [gene] locus=scaffold143363_11:586:1314:+ [Lack 3'-end] codon-table.11"]                                                                                                                                                                                                                                                                                                                                       |
| ["pigPIG-022_GL0080548 [gene] locus=scaffold59559_7:1:864:- [Lack 3'-end] codon-table.11"]                                                                                                                                                                                                                                                                                                                                            |
| ["pigPIG-023_GL0056374 [gene] locus=scaffold148285_1:3:668:- [Lack both ends] codon-table.11"]                                                                                                                                                                                                                                                                                                                                        |
| ["pigPIG-024_GL0218414 [gene] locus=scaffold117167_5:320:1414:- [Complete] codon-table.11"]                                                                                                                                                                                                                                                                                                                                           |
| ["pigPIG-026_GL0071880 [gene] locus=scaffold104889_1:6433:7443:+ [Complete] codon-table.11"]                                                                                                                                                                                                                                                                                                                                          |
| ["pigPIG-026_GL0116698 [gene] locus=scaffold1878_2:158:1339:+ [Complete] codon-table.11"]                                                                                                                                                                                                                                                                                                                                             |
| ["pigPIG-027_GL0261576 [gene] locus=scaffold178107_1:339:1322:- [Complete] codon-table.11"]                                                                                                                                                                                                                                                                                                                                           |
| ["pigPIG-031_GL0026806 [gene] locus=scaffold20325_4:2:745:- [Lack 3'-end] codon-table.11"]                                                                                                                                                                                                                                                                                                                                            |
| ["pigPIG-031_GL0070146 [gene] locus=scaffold12058_1:3:734:- [Lack 3'-end] codon-table.11"]                                                                                                                                                                                                                                                                                                                                            |
| ["pigPIG-031_GL0109326 [gene] locus=scaffold104274_1:11586:12590:- [Complete] codon-table.11"]                                                                                                                                                                                                                                                                                                                                        |
| ["pigPIG-031_GL0138975 [gene] locus=scaffold128840_1:1:875:- [Lack 3'-end] codon-table.11",<br>"rumen552_GL0647860_1 [gene] locus=scaffold104244_2:3:677:+[Lack both ends]"]                                                                                                                                                                                                                                                          |
| ["pigPIG-031_GL0158070 [gene] locus=scaffold30741_4:2:526:+ [Lack 5'-end] codon-table.11"]                                                                                                                                                                                                                                                                                                                                            |
| ["pigPIG-031_GL0183583 [gene] locus=scaffold35012_2:2:859:+ [Lack both ends] codon-table.11"]                                                                                                                                                                                                                                                                                                                                         |
| ["pigPIG-032_GL0156946 [gene] locus=scaffold51801_10:1609:2601:+ [Complete] codon-table.11"]                                                                                                                                                                                                                                                                                                                                          |
| ["pigPIG-033_GL0032022 [gene] locus=C1607875_1:3:629:- [Lack both ends] codon-table.11"]                                                                                                                                                                                                                                                                                                                                              |
| ["pigPIG-034_GL0056463 [gene] locus=scaffold67620_6:1476:2234:- [Lack 5'-end] codon-table.11"]                                                                                                                                                                                                                                                                                                                                        |

|                                                                                                                                                                             |
|-----------------------------------------------------------------------------------------------------------------------------------------------------------------------------|
| ["pigPIG-034_GL0086619 [gene] locus=scaffold24268_6:1955:3046:- [Complete] codon-table.11"]                                                                                 |
| ["pigPIG-034_GL0130359 [gene] locus=scaffold11643_2:587:1123:+ [Lack 3'-end] codon-table.11"]                                                                               |
| ["pigPIG-035_GL0001096 [gene] locus=scaffold90148_2:2:826:- [Lack 3'-end] codon-table.11"]                                                                                  |
| ["pigPIG-035_GL0017485 [gene] locus=scaffold86648_2:137:775:- [Lack 5'-end] codon-table.11"]                                                                                |
| ["pigPIG-035_GL0022303 [gene] locus=scaffold79779_2:1:627:+ [Lack 5'-end] codon-table.11"]                                                                                  |
| ["pigPIG-036_GL0020839 [gene] locus=scaffold127014_1:431:1129:+ [Lack 3'-end] codon-table.11"]                                                                              |
| ["pigPIG-038_GL0021185 [gene] locus=scaffold112665_2:2:613:- [Lack both ends] codon-table.11"]                                                                              |
| ["pigPIG-038_GL0131957 [gene] locus=scaffold87099_2:2:517:+ [Lack both ends] codon-table.11"]                                                                               |
| ["pigPIG-038_GL0228101 [gene] locus=scaffold51839_3:226:822:+ [Lack 3'-end] codon-table.11"]                                                                                |
| ["pigPIG-039_GL0020000 [gene] locus=scaffold109634_1:1335:2129:- [Complete] codon-table.11"]                                                                                |
| ["pigPIG-042_GL0146265 [gene] locus=scaffold15812_22:349:1347:+ [Complete] codon-table.11"]                                                                                 |
| ["pigPIG-043_GL0176010 [gene] locus=scaffold125895_1:19:627:- [Lack 5'-end] codon-table.11"]                                                                                |
| ["pigPIG-045_GL0165943 [gene] locus=scaffold45985_4:3:674:- [Lack 3'-end] codon-table.11"]                                                                                  |
| ["pigPIG-046_GL0121324 [gene] locus=scaffold124352_2:2:685:+ [Lack 5'-end] codon-table.11"]                                                                                 |
| ["pigPIG-046_GL0162651 [gene] locus=scaffold147028_1:10280:11035:- [Complete] codon-table.11"]                                                                              |
| ["pigPIG-048_GL0106673 [gene] locus=scaffold88520_1:1:879:+ [Lack 5'-end] codon-table.11"]                                                                                  |
| ["pigPIG-052_GL0033206 [gene] locus=scaffold77968_1:3:626:- [Lack both ends] codon-table.11"]                                                                               |
| ["pigPIG-053_GL0226587 [gene] locus=scaffold172312_1:3:653:+ [Lack both ends] codon-table.11"]                                                                              |
| ["pigPIG-076_GL0066297 [gene] locus=scaffold177549_2:2:835:- [Lack 3'-end] codon-table.11"]                                                                                 |
| ["pigPIG-084_GL0078495 [gene] locus=scaffold145976_1:427:1179:+ [Lack 3'-end] codon-table.11"]                                                                              |
| ["pigPIG-086_GL0168234 [gene] locus=scaffold48952_1:3:530:+ [Lack 5'-end] codon-table.11"]                                                                                  |
| ["pigPIG-086_GL0170780 [gene] locus=scaffold39925_2:428:940:+ [Lack 3'-end] codon-table.11"]                                                                                |
| ["pigPIG-094_GL0069997 [gene] locus=scaffold55492_3:127:744:- [Lack 5'-end] codon-table.11"]                                                                                |
| ["pigPIG-094_GL0107435 [gene] locus=scaffold16034_12:1:663:- [Lack 3'-end] codon-table.11"]                                                                                 |
| ["pigPIG-103_GL0226005 [gene] locus=scaffold62430_1:266:757:- [Lack 5'-end] codon-table.11"]                                                                                |
| ["pigPIG-105_GL0105545 [gene] locus=scaffold22207_3:3:782:+ [Lack 5'-end] codon-table.11"]                                                                                  |
| ["pigPIG-107_GL0188439 [gene] locus=scaffold18356_1:2:508:- [Lack 3'-end] codon-table.11"]                                                                                  |
| ["pigPIG-108_GL0002701 [gene] locus=scaffold114361_1:231:1055:- [Lack 5'-end] codon-table.11"]                                                                              |
| ["pigPIG-110_GL0136177 [gene] locus=scaffold22146_5:2:418:+ [Lack 5'-end] codon-table.11"]                                                                                  |
| ["pigPIG-110_GL0147214 [gene] locus=scaffold22146_4:780:1427:+ [Lack 3'-end] codon-table.11"]                                                                               |
| ["pigPIG-110_GL0176009 [gene] locus=scaffold92729_5:2:631:- [Lack both ends] codon-table.11",<br>"rumen7049_GL1501887_1 [gene] locus=C51935206_1:1:630:- [Lack both ends]"] |
| ["pigPIG_112_GL0043743 [gene] locus=scaffold180654_1:46:597:- [Lack 5'-end] codon-table.11"]                                                                                |
| ["pigPIG_112_GL0046752 [gene] locus=C2909405_1:155:688:+ [Lack 3'-end] codon-table.11"]                                                                                     |
| ["pigPIG_113_GL0228033 [gene] locus=scaffold208174_1:43:690:- [Lack 5'-end] codon-table.11"]                                                                                |
| ["pigPIG_114_GL0139742 [gene] locus=scaffold107545_3:90:1073:- [Lack 5'-end] codon-table.11"]                                                                               |
| ["pigPIG_114_GL0184431 [gene] locus=scaffold149440_1:66:674:+ [Lack 3'-end] codon-table.11"]                                                                                |
| ["pigPIG_115_GL0148003 [gene] locus=scaffold168813_3:129:938:- [Lack 5'-end] codon-table.11"]                                                                               |
| ["pigPIG_117_GL0190473 [gene] locus=scaffold262986_1:9237:10058:+ [Lack 3'-end] codon-table.11"]                                                                            |
| ["pigPIG_120_GL0063343 [gene] locus=scaffold47651_1:3:578:- [Lack 3'-end] codon-table.11"]                                                                                  |
| ["pigPIG_120_GL0202954 [gene] locus=C2021344_1:3:653:- [Lack both ends] codon-table.11"]                                                                                    |
| ["pigPIG_121_GL0018361 [gene] locus=scaffold3077_1:3:557:- [Lack both ends] codon-table.11"]                                                                                |
| ["pigPIG_121_GL0340510 [gene] locus=scaffold238125_1:2:856:+ [Lack both ends] codon-table.11"]                                                                              |

|                                                                                                                                                                                                                                                                                                                                                                                                                                                                                                                                                                                                                                                                                                                                                                                                                                                  |
|--------------------------------------------------------------------------------------------------------------------------------------------------------------------------------------------------------------------------------------------------------------------------------------------------------------------------------------------------------------------------------------------------------------------------------------------------------------------------------------------------------------------------------------------------------------------------------------------------------------------------------------------------------------------------------------------------------------------------------------------------------------------------------------------------------------------------------------------------|
| ["pigPIG_124_GL0162375 [gene] locus=C3077170_1:3:626:- [Lack both ends] codon-table.11"]                                                                                                                                                                                                                                                                                                                                                                                                                                                                                                                                                                                                                                                                                                                                                         |
| ["pigPIG_124_GL0246913 [gene] locus=scaffold236658_1:493:1155:+ [Lack 3'-end] codon-table.11"]                                                                                                                                                                                                                                                                                                                                                                                                                                                                                                                                                                                                                                                                                                                                                   |
| ["pigPIG_125_GL0120814 [gene] locus=scaffold71681_1:2:811:- [Lack 3'-end] codon-table.11"]                                                                                                                                                                                                                                                                                                                                                                                                                                                                                                                                                                                                                                                                                                                                                       |
| ["pigPIG_134_GL0004942 [gene] locus=C3182390_1:63:770:- [Lack 5'-end] codon-table.11"]                                                                                                                                                                                                                                                                                                                                                                                                                                                                                                                                                                                                                                                                                                                                                           |
| ["pigPIG_147_GL0060621 [gene] locus=scaffold5827_2:179:727:- [Lack 5'-end] codon-table.11"]                                                                                                                                                                                                                                                                                                                                                                                                                                                                                                                                                                                                                                                                                                                                                      |
| ["pigPIG_147_GL0120521 [gene] locus=scaffold191187_3:3:569:+ [Lack both ends] codon-table.11"]                                                                                                                                                                                                                                                                                                                                                                                                                                                                                                                                                                                                                                                                                                                                                   |
| ["pigPIG_151_GL0062620 [gene] locus=scaffold282726_3:2133:2702:+ [Lack 3'-end] codon-table.11",<br>"pigPIG-019_GL0077816 [gene] locus=scaffold61368_1:3:572:- [Lack 3'-end] codon-table.11"]                                                                                                                                                                                                                                                                                                                                                                                                                                                                                                                                                                                                                                                     |
| ["pigPIG_151_GL0235159 [gene] locus=scaffold160179_4:875:1855:- [Complete] codon-table.11",<br>"rumen554_GL1214101_1 [gene] locus=scaffold210164_7:1586:2566:-[Complete]",<br>"rumen3042_GL1252232_1 [gene] locus=scaffold1581218_3:655:1635:-[Complete]",<br>"rumen7049_GL2016357_1 [gene] locus=scaffold547177_1:13771:14751:-[Complete]"]                                                                                                                                                                                                                                                                                                                                                                                                                                                                                                     |
| ["pigPIG_151_GL0296431 [gene] locus=scaffold15482_2:2083:3141:- [Complete] codon-table.11",<br>"rumen552_GL0039217_1 [gene] locus=scaffold1080482_1:2078:3136:-[Complete]"]                                                                                                                                                                                                                                                                                                                                                                                                                                                                                                                                                                                                                                                                      |
| ["pigPIG_161_GL0112306 [gene] locus=scaffold75100_2:2:529:- [Lack 3'-end] codon-table.11",<br>"rumen100058_GL0343992_1 [gene] locus=scaffold1850228_1:3:530:-[Lack 3'-end]"]                                                                                                                                                                                                                                                                                                                                                                                                                                                                                                                                                                                                                                                                     |
| ["pigPIG_161_GL0203859 [gene] locus=scaffold48755_4:7030:8076:- [Complete] codon-table.11",<br>"pigPIG-004_GL0134388 [gene] locus=scaffold116127_3:6122:7168:+ [Complete] codon-table.11",<br>"pigPIG-084_GL0029807 [gene] locus=scaffold3479_2:1353:2399:- [Complete] codon-table.11",<br>"pigBHZ-2B_GL0168420 [gene] locus=scaffold108509_3:1719:2765:- [Complete] codon-table.11",<br>"pigBHZ-8B_GL0156557 [gene] locus=scaffold121381_2:49:1095:- [Complete] codon-table.11",<br>"pigDB-11B_GL0045004 [gene] locus=scaffold168309_1:22693:23739:+ [Complete] codon-table.11",<br>"pigEYZ-120B_GL0231006 [gene] locus=scaffold227465_1:1931:2977:+ [Complete] codon-table.11",<br>"rumen553_GL0221646_1 [gene] locus=scaffold33195_7:14679:15725:-[Complete]",<br>"rumen583_GL0637373_1 [gene] locus=scaffold61989_5:9256:10302:-[Complete]"] |
| ["pigPIG_173_GL0086508 [gene] locus=scaffold244695_1:1:1083:+ [Lack 5'-end] codon-table.11"]                                                                                                                                                                                                                                                                                                                                                                                                                                                                                                                                                                                                                                                                                                                                                     |
| ["pigPIG_173_GL0089538 [gene] locus=scaffold35130_1:1:1056:+ [Lack 5'-end] codon-table.11"]                                                                                                                                                                                                                                                                                                                                                                                                                                                                                                                                                                                                                                                                                                                                                      |
| ["pigPIG_174_GL0160487 [gene] locus=scaffold73905_3:139:921:+ [Lack 3'-end] codon-table.11"]                                                                                                                                                                                                                                                                                                                                                                                                                                                                                                                                                                                                                                                                                                                                                     |
| ["pigPIG_177_GL0142182 [gene] locus=scaffold128873_1:199:915:+ [Lack 3'-end] codon-table.11"]                                                                                                                                                                                                                                                                                                                                                                                                                                                                                                                                                                                                                                                                                                                                                    |
| ["pigPIG_182_GL0017741 [gene] locus=scaffold15184_3:2:706:+ [Lack both ends] codon-table.11"]                                                                                                                                                                                                                                                                                                                                                                                                                                                                                                                                                                                                                                                                                                                                                    |
| ["pigPIG_186_GL0068966 [gene] locus=scaffold265203_1:2:799:+ [Lack 5'-end] codon-table.11"]                                                                                                                                                                                                                                                                                                                                                                                                                                                                                                                                                                                                                                                                                                                                                      |
| ["pigPIG_186_GL0089332 [gene] locus=scaffold156153_2:3:1040:+ [Lack 5'-end] codon-table.11"]                                                                                                                                                                                                                                                                                                                                                                                                                                                                                                                                                                                                                                                                                                                                                     |
| ["pigPIG_186_GL0277490 [gene] locus=C4249751_1:390:1460:- [Complete] codon-table.11"]                                                                                                                                                                                                                                                                                                                                                                                                                                                                                                                                                                                                                                                                                                                                                            |
| ["pigPIG_186_GL0371351 [gene] locus=scaffold124949_7:7309:8262:- [Complete] codon-table.11"]                                                                                                                                                                                                                                                                                                                                                                                                                                                                                                                                                                                                                                                                                                                                                     |
| ["pigPIG_189_GL0091475 [gene] locus=scaffold188452_2:1:645:- [Lack 3'-end] codon-table.11"]                                                                                                                                                                                                                                                                                                                                                                                                                                                                                                                                                                                                                                                                                                                                                      |
| ["pigPIG_191_GL0209904 [gene] locus=scaffold50212_4:1494:2339:+ [Lack 3'-end] codon-table.11"]                                                                                                                                                                                                                                                                                                                                                                                                                                                                                                                                                                                                                                                                                                                                                   |
| ["pigPIG_192_GL0214797 [gene] locus=scaffold58621_1:3:983:+ [Lack 5'-end] codon-table.11"]                                                                                                                                                                                                                                                                                                                                                                                                                                                                                                                                                                                                                                                                                                                                                       |
| ["pigPIG_196_GL0082817 [gene] locus=scaffold218260_2:1:846:- [Lack both ends] codon-table.11"]                                                                                                                                                                                                                                                                                                                                                                                                                                                                                                                                                                                                                                                                                                                                                   |
| ["pigPIG_196_GL0196824 [gene] locus=scaffold145779_3:2:442:- [Lack 3'-end] codon-table.11"]                                                                                                                                                                                                                                                                                                                                                                                                                                                                                                                                                                                                                                                                                                                                                      |
| ["pigPIG_201_GL0074903 [gene] locus=C3028022_1:2:544:- [Lack both ends] codon-table.11"]                                                                                                                                                                                                                                                                                                                                                                                                                                                                                                                                                                                                                                                                                                                                                         |
| ["pigPIG_201_GL0107757 [gene] locus=scaffold138844_1:1:915:+ [Lack 5'-end] codon-table.11",<br>"rumen3042_GL2448260_1 [gene] locus=scaffold2096147_1:2:913:-[Lack 3'-end]"]                                                                                                                                                                                                                                                                                                                                                                                                                                                                                                                                                                                                                                                                      |
| ["pigPIG_204_GL0190733 [gene] locus=scaffold20761_5:3:1112:- [Lack 3'-end] codon-table.11"]                                                                                                                                                                                                                                                                                                                                                                                                                                                                                                                                                                                                                                                                                                                                                      |

|                                                                                                                                                                                                                                                         |
|---------------------------------------------------------------------------------------------------------------------------------------------------------------------------------------------------------------------------------------------------------|
| ["pigSYZ-388B_GL0068383 [gene] locus=scaffold182951_1:794:1381:+ [Lack 3'-end] codon-table.11"]                                                                                                                                                         |
| ["pigSYZ-388B_GL0161697 [gene] locus=scaffold5891_3:95:1126:- [Complete] codon-table.11"]                                                                                                                                                               |
| ["pigSYZ-426B_GL0135420 [gene] locus=scaffold142921_1:1:663:+ [Lack both ends] codon-table.11"]                                                                                                                                                         |
| ["pigZXZ-10B_GL0067174 [gene] locus=scaffold178907_1:5449:6438:+ [Complete] codon-table.11"]                                                                                                                                                            |
| ["pigZXZ-1B_GL0217716 [gene] locus=scaffold90253_2:2:775:- [Lack 3'-end] codon-table.11"]                                                                                                                                                               |
| ["pigZXZ-3B_GL0006464 [gene] locus=scaffold871_2:2:889:+ [Lack 5'-end] codon-table.11",<br>"rumen555_GL1691731_1 [gene] locus=scaffold786534_2:2:886:+[Lack both ends]"]                                                                                |
| ["pigZXZ-4B_GL0176666 [gene] locus=scaffold8454_1:5769:6815:+ [Complete] codon-table.11"]                                                                                                                                                               |
| ["pigZXZ-7B_GL0179188 [gene] locus=scaffold31732_1:3529:4506:- [Lack 5'-end] codon-table.11"]                                                                                                                                                           |
| ["pigZXZ-8B_GL0117670 [gene] locus=C2182832_1:2:508:- [Lack both ends] codon-table.11"]                                                                                                                                                                 |
| ["pigZXZ-8B_GL0244838 [gene] locus=scaffold26205_1:1:633:+ [Lack 5'-end] codon-table.11",<br>"rumen554_GL0332524_1 [gene] locus=scaffold1493107_1:1835:2467:-[Lack 5'-end]"]                                                                            |
| ["pigZXZ-9B_GL0114291 [gene] locus=scaffold179798_1:2:514:+ [Lack 5'-end] codon-table.11"]                                                                                                                                                              |
| ["rumen0081_GL0064712_1 [gene] locus=scaffold335362_3:2513:3172:+[Lack 3'-end]",<br>"rumen100058_GL2408121_1 [gene] locus=scaffold3036593_1:3:662:-[Lack 3'-end]"]                                                                                      |
| ["rumen0081_GL0180557_1 [gene] locus=scaffold1726079_2:1457:1981:+[Lack 3'-end]"]                                                                                                                                                                       |
| ["rumen0081_GL0219362_1 [gene] locus=scaffold1711638_1:427:1014:-[Lack 5'-end]"]                                                                                                                                                                        |
| ["rumen0081_GL0320729_1 [gene] locus=scaffold22173_5:10552:11130:+[Lack 3'-end]"]                                                                                                                                                                       |
| ["rumen0081_GL0450092_1 [gene] locus=scaffold948276_1:2:664:-[Lack 3'-end]"]                                                                                                                                                                            |
| ["rumen0081_GL0466755_1 [gene] locus=scaffold104428_3:1667:2581:-[Lack 5'-end]"]                                                                                                                                                                        |
| ["rumen0081_GL0496130_1 [gene] locus=scaffold928199_1:1:405:+[Lack 5'-end]"]                                                                                                                                                                            |
| ["rumen0081_GL0506602_1 [gene] locus=scaffold1885440_2:1:768:-[Lack both ends]"]                                                                                                                                                                        |
| ["rumen0081_GL0514438_1 [gene] locus=scaffold519995_2:3:518:-[Lack 3'-end]"]                                                                                                                                                                            |
| ["rumen0081_GL0591288_1 [gene] locus=scaffold695432_2:131:505:-[Lack 5'-end]"]                                                                                                                                                                          |
| ["rumen0081_GL0622563_1 [gene] locus=scaffold349208_1:1:468:-[Lack 3'-end]",<br>"rumen3042_GL1267162_1 [gene] locus=scaffold1560219_1:206:673:+[Lack 3'-end]"]                                                                                          |
| ["rumen0081_GL0635854_1 [gene] locus=scaffold1129532_1:12771:13778:+[Complete]"]                                                                                                                                                                        |
| ["rumen0081_GL0647534_1 [gene] locus=C38313395_1:3:437:-[Lack 3'-end]"]                                                                                                                                                                                 |
| ["rumen0081_GL0722202_1 [gene] locus=scaffold1960186_1:3:836:+[Lack both ends]"]                                                                                                                                                                        |
| ["rumen0081_GL0787985_1 [gene] locus=scaffold411888_2:1:816:-[Lack 3'-end]"]                                                                                                                                                                            |
| ["rumen0081_GL0837490_1 [gene] locus=scaffold356149_2:2:637:-[Lack 3'-end]",<br>"rumen7049_GL0851061_1 [gene] locus=scaffold2139164_1:3:638:-[Lack 3'-end]"]                                                                                            |
| ["rumen0081_GL1022157_1 [gene] locus=scaffold1342277_3:304:840:+[Lack 3'-end]"]                                                                                                                                                                         |
| ["rumen0081_GL1036706_1 [gene] locus=scaffold860226_1:1461:2237:+[Lack 3'-end]",<br>"rumen100058_GL0614671_1 [gene] locus=scaffold667058_3:296:1072:+[Lack 3'-end]"]                                                                                    |
| ["rumen0081_GL1060731_1 [gene] locus=scaffold317383_6:262:1125:-[Lack 5'-end]"]                                                                                                                                                                         |
| ["rumen0081_GL1138368_1 [gene] locus=scaffold888200_2:50:613:-[Lack 5'-end]",<br>"rumen2009040_GL1064927_1 [gene] locus=scaffold1779755_1:1:564:+[Lack 5'-end]",<br>"rumen2009040_GL3211683_1 [gene] locus=scaffold2032426_3:1377:1940:-[Lack 5'-end]"] |
| ["rumen0081_GL1148546_1 [gene] locus=scaffold279507_1:1:618:+[Lack both ends]"]                                                                                                                                                                         |
| ["rumen0081_GL1259314_1 [gene] locus=scaffold1479207_1:3:683:+[Lack 5'-end]"]                                                                                                                                                                           |
| ["rumen0081_GL1498862_1 [gene] locus=scaffold1916965_1:3:794:+[Lack both ends]"]                                                                                                                                                                        |
| ["rumen0081_GL1569460_1 [gene] locus=scaffold1237992_2:1:522:-[Lack both ends]"]                                                                                                                                                                        |

|                                                                                                                                                                      |
|----------------------------------------------------------------------------------------------------------------------------------------------------------------------|
| ["rumen0081_GL1894171_1 [gene] locus=scaffold1729023_1:336:773:+[Lack 3'-end]"]                                                                                      |
| ["rumen0081_GL2032736_1 [gene] locus=scaffold643617_1:2:658:+[Lack both ends]",<br>"rumen2009040_GL0725324_1 [gene] locus=scaffold921679_7:419:1075:+[Lack 3'-end]"] |
| ["rumen0081_GL2207767_1 [gene] locus=scaffold68961_5:34:780:+[Lack 3'-end]"]                                                                                         |
| ["rumen0081_GL2264799_1 [gene] locus=scaffold570051_3:395:1288:-[Lack 5'-end]"]                                                                                      |
| ["rumen0081_GL2294332_1 [gene] locus=scaffold303130_2:46:1032:-[Complete]",<br>"rumen7049_GL2837273_1 [gene] locus=scaffold23373_2:622:1608:+[Complete]"]            |
| ["rumen0081_GL2367573_1 [gene] locus=scaffold1744014_1:2:874:+[Lack both ends]"]                                                                                     |
| ["rumen0081_GL2504313_1 [gene] locus=scaffold1829874_2:463:870:-[Lack 5'-end]"]                                                                                      |
| ["rumen0081_GL2511108_1 [gene] locus=scaffold1835477_4:526:1272:+[Lack 3'-end]"]                                                                                     |
| ["rumen0081_GL2516639_1 [gene] locus=scaffold272372_3:1:546:-[Lack 3'-end]"]                                                                                         |
| ["rumen100058_GL0079654_1 [gene] locus=scaffold2482952_1:287:907:+[Lack 3'-end]",<br>"rumen7049_GL2697687_1 [gene] locus=scaffold1189584_1:530:1150:+[Lack 3'-end]"] |
| ["rumen100058_GL0081051_1 [gene] locus=scaffold669218_1:133:933:-[Lack 5'-end]"]                                                                                     |
| ["rumen100058_GL0261337_1 [gene] locus=C58467978_1:64:600:-[Lack 5'-end]",<br>"rumen100058_GL1879101_1 [gene] locus=scaffold2482952_2:2:538:+[Lack 5'-end]"]         |
| ["rumen100058_GL0380841_1 [gene] locus=scaffold287968_2:2:721:+[Lack 5'-end]"]                                                                                       |
| ["rumen100058_GL0421245_1 [gene] locus=C60063984_1:144:1070:-[Lack 5'-end]"]                                                                                         |
| ["rumen100058_GL0465739_1 [gene] locus=C59653742_1:2:859:+[Lack both ends]"]                                                                                         |
| ["rumen100058_GL0478693_1 [gene] locus=scaffold2427909_2:1:501:+[Lack both ends]"]                                                                                   |
| ["rumen100058_GL0506470_1 [gene] locus=scaffold701222_3:2:535:+[Lack 5'-end]"]                                                                                       |
| ["rumen100058_GL0525691_1 [gene] locus=scaffold3220036_1:3:539:-[Lack both ends]"]                                                                                   |
| ["rumen100058_GL0526834_1 [gene] locus=C59209324_1:2:565:-[Lack 3'-end]"]                                                                                            |
| ["rumen100058_GL0557509_1 [gene] locus=scaffold1150310_1:3:674:-[Lack 3'-end]"]                                                                                      |
| ["rumen100058_GL0582312_1 [gene] locus=scaffold1584502_1:3:635:-[Lack 3'-end]"]                                                                                      |
| ["rumen100058_GL0625438_1 [gene] locus=scaffold841425_2:1:522:+[Lack 5'-end]"]                                                                                       |
| ["rumen100058_GL0636960_1 [gene] locus=scaffold2401224_3:3519:4220:-[Lack 5'-end]"]                                                                                  |
| ["rumen100058_GL0682011_1 [gene] locus=scaffold1062049_3:237:917:-[Lack 5'-end]"]                                                                                    |
| ["rumen100058_GL0683357_1 [gene] locus=scaffold304188_6:1:693:+[Lack both ends]"]                                                                                    |
| ["rumen100058_GL0695139_1 [gene] locus=scaffold148552_6:101:634:+[Lack 3'-end]"]                                                                                     |
| ["rumen100058_GL0792543_1 [gene] locus=scaffold2044073_2:1:558:+[Lack 5'-end]"]                                                                                      |
| ["rumen100058_GL0845169_1 [gene] locus=scaffold1747050_1:3:566:-[Lack both ends]"]                                                                                   |
| ["rumen100058_GL0853967_1 [gene] locus=scaffold1326759_8:384:1235:-[Lack 5'-end]"]                                                                                   |
| ["rumen100058_GL0973147_1 [gene] locus=scaffold1383390_2:3:815:+[Lack 5'-end]"]                                                                                      |
| ["rumen100058_GL0992694_1 [gene] locus=scaffold2634064_1:252:779:+[Lack 3'-end]"]                                                                                    |
| ["rumen100058_GL1037585_1 [gene] locus=scaffold2177230_6:2:583:+[Lack 5'-end]"]                                                                                      |
| ["rumen100058_GL1104505_1 [gene] locus=scaffold219305_8:1:885:-[Lack 3'-end]"]                                                                                       |
| ["rumen100058_GL1140300_1 [gene] locus=scaffold1542785_1:1:435:+[Lack 5'-end]"]                                                                                      |
| ["rumen100058_GL1158545_1 [gene] locus=scaffold473697_16:729:1382:-[Lack 5'-end]"]                                                                                   |
| ["rumen100058_GL1191325_1 [gene] locus=scaffold1204567_1:3:1025:+[Lack 5'-end]"]                                                                                     |
| ["rumen100058_GL1202198_1 [gene] locus=scaffold43743_2:1000:1470:-[Lack 5'-end]"]                                                                                    |
| ["rumen100058_GL1235318_1 [gene] locus=scaffold2116946_2:3:659:-[Lack both ends]"]                                                                                   |
| ["rumen100058_GL1456035_1 [gene] locus=scaffold1144469_2:2750:3187:+[Lack 3'-end]"]                                                                                  |

|                                                                                                                                                                                                                                                      |
|------------------------------------------------------------------------------------------------------------------------------------------------------------------------------------------------------------------------------------------------------|
| ["rumen100058_GL1457706_1 [gene] locus=scaffold504761_8:5491:6477:-[Complete]"]                                                                                                                                                                      |
| ["rumen100058_GL1491609_1 [gene] locus=scaffold2100049_3:551:1108:-[Lack 5'-end]"]                                                                                                                                                                   |
| ["rumen100058_GL1672632_1 [gene] locus=scaffold1097695_1:1:615:-[Lack both ends]"]                                                                                                                                                                   |
| ["rumen100058_GL1762175_1 [gene] locus=C59653100_1:2:460:-[Lack 3'-end]"]                                                                                                                                                                            |
| ["rumen100058_GL1798831_1 [gene] locus=scaffold1034605_2:265:765:-[Lack 5'-end]"]                                                                                                                                                                    |
| ["rumen100058_GL1852281_1 [gene] locus=C60630239_1:1:744:-[Lack 5'-end]"]                                                                                                                                                                            |
| ["rumen100058_GL1918829_1 [gene] locus=scaffold460743_1:190:930:-[Lack 5'-end]"]                                                                                                                                                                     |
| ["rumen100058_GL2180245_1 [gene] locus=scaffold1168088_1:3:443:-[Lack 3'-end]"]                                                                                                                                                                      |
| ["rumen100058_GL2188441_1 [gene] locus=scaffold1613850_2:2:769:-[Lack 5'-end]"]                                                                                                                                                                      |
| ["rumen100058_GL2207649_1 [gene] locus=scaffold2065209_3:1:495:-[Lack 3'-end]",<br>"rumen2009040_GL3533319_1 [gene] locus=scaffold1132249_9:85:579:-[Lack 3'-end]"]                                                                                  |
| ["rumen100058_GL2218560_1 [gene] locus=scaffold1231026_2:134:601:-[Lack 3'-end]"]                                                                                                                                                                    |
| ["rumen100058_GL2343963_1 [gene] locus=scaffold222765_2:3:581:-[Lack both ends]"]                                                                                                                                                                    |
| ["rumen100058_GL2355416_1 [gene] locus=scaffold601745_1:1:435:-[Lack 3'-end]",<br>"rumen2009040_GL0084699_1 [gene] locus=scaffold2019961_3:1:435:-[Lack 3'-end]",<br>"rumen2009040_GL0764629_1 [gene] locus=scaffold2891642_1:1:435:-[Lack 3'-end]"] |
| ["rumen100058_GL2477506_1 [gene] locus=scaffold2726598_5:3:641:-[Lack both ends]"]                                                                                                                                                                   |
| ["rumen100058_GL2492340_1 [gene] locus=scaffold2596894_1:3:587:-[Lack both ends]"]                                                                                                                                                                   |
| ["rumen100058_GL2598903_1 [gene] locus=scaffold2681007_1:3:506:-[Lack both ends]"]                                                                                                                                                                   |
| ["rumen100058_GL2619329_1 [gene] locus=scaffold2605206_4:3:677:-[Lack 5'-end]"]                                                                                                                                                                      |
| ["rumen100058_GL2669656_1 [gene] locus=scaffold237071_1:1:615:-[Lack both ends]"]                                                                                                                                                                    |
| ["rumen100058_GL2673104_1 [gene] locus=scaffold3313772_2:1:612:-[Lack 3'-end]"]                                                                                                                                                                      |
| ["rumen100058_GL2688429_1 [gene] locus=scaffold2206611_1:1:771:-[Lack both ends]"]                                                                                                                                                                   |
| ["rumen100058_GL2945045_1 [gene] locus=scaffold893877_2:262:687:-[Lack 3'-end]"]                                                                                                                                                                     |
| ["rumen100058_GL2988089_1 [gene] locus=scaffold1422792_4:3:554:-[Lack both ends]"]                                                                                                                                                                   |
| ["rumen100058_GL3012780_1 [gene] locus=scaffold1851187_1:3:974:-[Lack 3'-end]"]                                                                                                                                                                      |
| ["rumen100058_GL3029535_1 [gene] locus=scaffold2288317_1:1:516:-[Lack 3'-end]"]                                                                                                                                                                      |
| ["rumen100058_GL3089023_1 [gene] locus=scaffold1751573_2:3:854:-[Lack 3'-end]"]                                                                                                                                                                      |
| ["rumen100058_GL3158956_1 [gene] locus=scaffold2997315_1:2:502:-[Lack both ends]"]                                                                                                                                                                   |
| ["rumen100058_GL3180428_1 [gene] locus=scaffold1532957_1:1:750:-[Lack both ends]"]                                                                                                                                                                   |
| ["rumen100058_GL3312332_1 [gene] locus=scaffold449044_3:1:1479:12450:-[Complete]"]                                                                                                                                                                   |
| ["rumen100058_GL3672783_1 [gene] locus=scaffold303729_1:3:497:-[Lack 5'-end]"]                                                                                                                                                                       |
| ["rumen100058_GL3687739_1 [gene] locus=scaffold560984_6:8814:9773:-[Complete]"]                                                                                                                                                                      |
| ["rumen100058_GL3783820_1 [gene] locus=scaffold3335926_1:3:530:-[Lack 3'-end]"]                                                                                                                                                                      |
| ["rumen100058_GL3794898_1 [gene] locus=scaffold1511960_1:1:597:-[Lack 3'-end]"]                                                                                                                                                                      |
| ["rumen100058_GL3849461_1 [gene] locus=scaffold1712369_5:1:717:-[Lack both ends]"]                                                                                                                                                                   |
| ["rumen100058_GL3850397_1 [gene] locus=scaffold466119_5:2:595:-[Lack 5'-end]"]                                                                                                                                                                       |
| ["rumen100058_GL3866082_1 [gene] locus=scaffold2163156_1:1698:2636:-[Lack 3'-end]"]                                                                                                                                                                  |
| ["rumen2009040_GL0013822_1 [gene] locus=scaffold1501276_1:3:572:-[Lack 3'-end]"]                                                                                                                                                                     |
| ["rumen2009040_GL0033910_1 [gene] locus=scaffold1051144_1:218:634:-[Lack 3'-end]"]                                                                                                                                                                   |
| ["rumen2009040_GL0044390_1 [gene] locus=scaffold1685100_6:2:484:-[Lack 5'-end]"]                                                                                                                                                                     |
| ["rumen2009040_GL0053895_1 [gene] locus=scaffold2248574_5:142:702:-[Lack 5'-end]"]                                                                                                                                                                   |
| ["rumen2009040_GL0120670_1 [gene] locus=scaffold534733_1:2:739:-[Lack 3'-end]"]                                                                                                                                                                      |



|                                                                                                                                                                   |
|-------------------------------------------------------------------------------------------------------------------------------------------------------------------|
| ["rumen2009040_GL0224376_1 [gene] locus=scaffold1970846_1:1:504:+[Lack both ends]"                                                                                |
| ["rumen2009040_GL0233242_1 [gene] locus=scaffold1685100_5:1050:1598:+[Lack 3'-end]"                                                                               |
| ["rumen2009040_GL0398315_1 [gene] locus=scaffold496817_1:3:704:-[Lack 3'-end]"                                                                                    |
| ["rumen2009040_GL0401806_1 [gene] locus=scaffold1884788_1:3:431:-[Lack 3'-end]"                                                                                   |
| ["rumen2009040_GL0471805_1 [gene] locus=scaffold2019961_2:158:688:-[Lack 5'-end]"                                                                                 |
| ["rumen2009040_GL0483013_1 [gene] locus=scaffold2990488_1:5:557:+[Lack 3'-end]"                                                                                   |
| ["rumen2009040_GL0557834_1 [gene] locus=scaffold165733_3:1:759:-[Lack 3'-end]"                                                                                    |
| ["rumen2009040_GL0604477_1 [gene] locus=scaffold2273279_1:918:1922:-[Complete]"                                                                                   |
| ["rumen2009040_GL0633992_1 [gene] locus=scaffold75155_3:364:1440:-[Complete]"                                                                                     |
| ["rumen2009040_GL0718615_1 [gene] locus=scaffold2375838_3:2486:3619:-[Complete]"                                                                                  |
| ["rumen2009040_GL0742998_1 [gene] locus=scaffold1964664_1:1:852:-[Lack 3'-end]"                                                                                   |
| ["rumen2009040_GL0858824_1 [gene] locus=scaffold1072886_1:73:708:-[Lack 5'-end]"                                                                                  |
| ["rumen2009040_GL0864288_1 [gene] locus=scaffold2351439_6:93:1100:-[Complete]"                                                                                    |
| ["rumen2009040_GL0906752_1 [gene] locus=scaffold693703_2:1:513:+[Lack both ends]"                                                                                 |
| ["rumen2009040_GL0946200_1 [gene] locus=scaffold1654167_2_1:5384:6361:+[Complete]"                                                                                |
| ["rumen2009040_GL1021674_1 [gene] locus=scaffold1083537_5:318:779:+[Lack 3'-end]"                                                                                 |
| ["rumen2009040_GL1031267_1 [gene] locus=scaffold1634141_1:3:611:-[Lack 3'-end]"                                                                                   |
| ["rumen2009040_GL1101606_1 [gene] locus=scaffold1841291_1:3:737:-[Lack both ends]"                                                                                |
| ["rumen2009040_GL1154903_1 [gene] locus=scaffold1660524_1:3:584:-[Lack both ends]"                                                                                |
| ["rumen2009040_GL1221597_1 [gene] locus=scaffold1544424_1:1:603:-[Lack both ends]"                                                                                |
| ["rumen2009040_GL1226175_1 [gene] locus=scaffold1371129_1:48:830:-[Lack 5'-end]"                                                                                  |
| ["rumen2009040_GL1499537_1 [gene] locus=scaffold608886_3:1588:2031:+[Lack 3'-end]"                                                                                |
| ["rumen2009040_GL1507991_1 [gene] locus=scaffold1631608_1:3:536:-[Lack 3'-end]"                                                                                   |
| ["rumen2009040_GL1641623_1 [gene] locus=scaffold3013358_1:526:1218:-[Lack 5'-end]"                                                                                |
| ["rumen2009040_GL1752955_1 [gene] locus=scaffold3070662_1:2:529:+[Lack 5'-end]"                                                                                   |
| ["rumen2009040_GL1856502_1 [gene] locus=scaffold2694207_1:691:1164:+[Lack 3'-end]"                                                                                |
| ["rumen2009040_GL1884793_1 [gene] locus=scaffold486018_9:2:988:+[Lack 5'-end]",<br>"rumen2009040_GL2358267_1 [gene] locus=scaffold568460_3:2867:3853:+[Complete]" |
| ["rumen2009040_GL1934422_1 [gene] locus=scaffold834553_1:3:398:-[Lack 3'-end]"                                                                                    |
| ["rumen2009040_GL1939598_1 [gene] locus=scaffold1973934_1:346:852:-[Lack 5'-end]"                                                                                 |
| ["rumen2009040_GL2038368_1 [gene] locus=scaffold797035_2:3:746:-[Lack both ends]"                                                                                 |
| ["rumen2009040_GL2039335_1 [gene] locus=scaffold1259325_1:1:387:+[Lack 5'-end]"                                                                                   |
| ["rumen2009040_GL2342826_1 [gene] locus=scaffold2038314_4:65:508:-[Lack 5'-end]"                                                                                  |
| ["rumen2009040_GL2358857_1 [gene] locus=scaffold2741049_2:2:517:+[Lack both ends]"                                                                                |
| ["rumen2009040_GL2450151_1 [gene] locus=scaffold1602463_3:632:1222:-[Lack 5'-end]"                                                                                |
| ["rumen2009040_GL2457637_1 [gene] locus=scaffold823163_1:3:764:-[Lack both ends]"                                                                                 |
| ["rumen2009040_GL2481382_1 [gene] locus=scaffold1878280_1:290:766:-[Lack 5'-end]"                                                                                 |
| ["rumen2009040_GL2485216_1 [gene] locus=scaffold2673757_1:2:562:-[Lack 3'-end]"                                                                                   |
| ["rumen2009040_GL2540970_1 [gene] locus=scaffold667158_1:231:767:+[Lack 3'-end]"                                                                                  |
| ["rumen2009040_GL2681750_1 [gene] locus=scaffold965356_2:2:541:-[Lack 3'-end]"                                                                                    |
| ["rumen2009040_GL2749566_1 [gene] locus=scaffold1391674_2:2:382:-[Lack 3'-end]"                                                                                   |
| ["rumen2009040_GL2866314_1 [gene] locus=scaffold550879_2:231:725:+[Lack 3'-end]"                                                                                  |
| ["rumen2009040_GL2886490_1 [gene] locus=scaffold399958_1:45:641:-[Lack 5'-end]"                                                                                   |

|                                                                                                                                                                  |
|------------------------------------------------------------------------------------------------------------------------------------------------------------------|
| ["rumen2009040_GL3002242_1 [gene] locus=scaffold1756732_1:174:602:-[Lack 5'-end]"]                                                                               |
| ["rumen2009040_GL3003927_1 [gene] locus=scaffold2001010_1:2:565:+[Lack both ends]"]                                                                              |
| ["rumen2009040_GL3092996_1 [gene] locus=scaffold1065072_5:2:799:-[Lack both ends]"]                                                                              |
| ["rumen2009040_GL3122018_1 [gene] locus=scaffold2228259_1:1:417:+[Lack 5'-end]"]                                                                                 |
| ["rumen2009040_GL3149034_1 [gene] locus=scaffold1602463_4:3:440:-[Lack 3'-end]"]                                                                                 |
| ["rumen2009040_GL3159796_1 [gene] locus=scaffold1672356_1:2547:2954:+[Lack 3'-end]"]                                                                             |
| ["rumen2009040_GL3244925_1 [gene] locus=scaffold458366_2:1:618:+[Lack 5'-end]"]                                                                                  |
| ["rumen2009040_GL3252399_1 [gene] locus=scaffold354646_2:248:1126:-[Lack 5'-end]"]                                                                               |
| ["rumen2009040_GL3500043_1 [gene] locus=scaffold132598_3:555:1229:-[Complete]"]                                                                                  |
| ["rumen2009040_GL3546222_1 [gene] locus=scaffold48956_2:747:1130:+[Lack 3'-end]"]                                                                                |
| ["rumen2009040_GL3564879_1 [gene] locus=scaffold985728_4:1:468:-[Lack 3'-end]"]                                                                                  |
| ["rumen2009040_GL3572366_1 [gene] locus=scaffold1946553_1:3:716:+[Lack both ends]"]                                                                              |
| ["rumen2009040_GL3587455_1 [gene] locus=scaffold259684_3:2062:3102:+[Complete]"]                                                                                 |
| ["rumen2009040_GL3604636_1 [gene] locus=scaffold2690405_1:1:495:-[Lack 3'-end]"]                                                                                 |
| ["rumen3042_GL0054416_1 [gene] locus=scaffold2541751_1:3:599:-[Lack both ends]"]                                                                                 |
| ["rumen3042_GL0059726_1 [gene] locus=scaffold2016212_1:2:430:-[Lack 3'-end]"]                                                                                    |
| ["rumen3042_GL0198550_1 [gene] locus=scaffold276854_4:328:1068:+[Lack 3'-end]"]                                                                                  |
| ["rumen3042_GL0254281_1 [gene] locus=scaffold112505_1:3:422:-[Lack 3'-end]"]                                                                                     |
| ["rumen3042_GL0331410_1 [gene] locus=scaffold1938892_1:111:638:-[Lack 5'-end]"]                                                                                  |
| ["rumen3042_GL0398507_1 [gene] locus=scaffold746280_2:3:830:+[Lack 5'-end]"]                                                                                     |
| ["rumen3042_GL0516836_1 [gene] locus=scaffold1536019_1:2:601:-[Lack 3'-end]"]                                                                                    |
| ["rumen3042_GL0807425_1 [gene] locus=scaffold988551_2:1:558:-[Lack both ends]"]                                                                                  |
| ["rumen3042_GL0843767_1 [gene] locus=scaffold1194680_3:1:654:-[Lack both ends]"]                                                                                 |
| ["rumen3042_GL0855634_1 [gene] locus=scaffold1691162_1:2:598:+[Lack both ends]"]                                                                                 |
| ["rumen3042_GL1100163_1 [gene] locus=scaffold2090320_1:1:531:-[Lack both ends]"]                                                                                 |
| ["rumen3042_GL1199332_1 [gene] locus=scaffold464338_1:4103:5077:+[Lack 3'-end]"]                                                                                 |
| ["rumen3042_GL1361504_1 [gene] locus=scaffold2133872_1:2251:3225:-[Complete]"]                                                                                   |
| ["rumen3042_GL1469842_1 [gene] locus=scaffold2246887_1:629:1414:+[Lack 3'-end]"]                                                                                 |
| ["rumen3042_GL1536489_1 [gene] locus=scaffold2366345_2:1:621:-[Lack 3'-end]"]                                                                                    |
| ["rumen3042_GL1778640_1 [gene] locus=scaffold834880_1:125:931:-[Lack 5'-end]";<br>"rumen7049_GL1145126_1 [gene] locus=scaffold2130139_1:138:944:-[Lack 5'-end]"] |
| ["rumen3042_GL1782499_1 [gene] locus=scaffold1009641_1:1:480:+[Lack 5'-end]"]                                                                                    |
| ["rumen3042_GL1785542_1 [gene] locus=scaffold2071035_1:2:667:+[Lack 5'-end]"]                                                                                    |
| ["rumen3042_GL1828889_1 [gene] locus=scaffold1481722_1:1:675:+[Lack 5'-end]"]                                                                                    |
| ["rumen3042_GL1830411_1 [gene] locus=scaffold1965195_2:1180:2007:+[Lack 3'-end]"]                                                                                |
| ["rumen3042_GL1974783_1 [gene] locus=scaffold1945171_1:667:1605:+[Lack 3'-end]"]                                                                                 |
| ["rumen3042_GL2019109_1 [gene] locus=C51937322_1:1:822:+[Lack 5'-end]"]                                                                                          |
| ["rumen3042_GL2121460_1 [gene] locus=scaffold405571_1:1:516:-[Lack both ends]"]                                                                                  |
| ["rumen3042_GL2298145_1 [gene] locus=scaffold538723_3:446:1459:-[Complete]"]                                                                                     |
| ["rumen3042_GL2333201_1 [gene] locus=scaffold1999229_1:3:728:-[Lack 3'-end]"]                                                                                    |
| ["rumen3042_GL2429652_1 [gene] locus=scaffold332353_3:1052:1627:+[Lack 3'-end]"]                                                                                 |
| ["rumen3042_GL2547494_1 [gene] locus=scaffold1645370_1:1:825:-[Lack 3'-end]"]                                                                                    |
| ["rumen3042_GL2637606_1 [gene] locus=scaffold2292771_2:12:512:-[Lack 5'-end]"]                                                                                   |

|                                                                                                                                                                                                                                                                                                                               |
|-------------------------------------------------------------------------------------------------------------------------------------------------------------------------------------------------------------------------------------------------------------------------------------------------------------------------------|
| "rumen3042_GL2741871_1 [gene] locus=scaffold2292771_3:3:497:-[Lack 3'-end]"                                                                                                                                                                                                                                                   |
| "rumen552_GL0200156_1 [gene] locus=scaffold542591_1:3259:4155:+[Complete]",<br>"rumen583_GL0238724_1 [gene] locus=scaffold53255_1:26447:27343:-[Complete]"                                                                                                                                                                    |
| "rumen552_GL0316070_1 [gene] locus=scaffold104431_6:1729:2652:+[Lack 3'-end]"                                                                                                                                                                                                                                                 |
| "rumen552_GL0411876_1 [gene] locus=scaffold283057_11:1162:2178:-[Complete]"                                                                                                                                                                                                                                                   |
| "rumen552_GL0419835_1 [gene] locus=scaffold624963_1:3:593:-[Lack both ends]"                                                                                                                                                                                                                                                  |
| "rumen552_GL0471623_1 [gene] locus=scaffold568062_1:118:540:-[Lack 5'-end]",<br>"rumen2009040_GL3622741_1 [gene] locus=scaffold19258_1:1:423:+[Lack 5'-end]"                                                                                                                                                                  |
| "rumen552_GL0498541_1 [gene] locus=scaffold895475_2:2:547:+[Lack both ends]"                                                                                                                                                                                                                                                  |
| "rumen552_GL0611115_1 [gene] locus=scaffold873417_2:3:743:-[Lack both ends]"                                                                                                                                                                                                                                                  |
| "rumen552_GL0729319_1 [gene] locus=scaffold418947_4:3:503:+[Lack 5'-end]"                                                                                                                                                                                                                                                     |
| "rumen552_GL0753092_1 [gene] locus=scaffold688634_2:9436:10461:+[Complete]"                                                                                                                                                                                                                                                   |
| "rumen552_GL0776467_1 [gene] locus=scaffold314335_2:1012:1650:+[Lack 3'-end]"                                                                                                                                                                                                                                                 |
| "rumen552_GL0881705_1 [gene] locus=scaffold209070_8:1:561:+[Lack both ends]"                                                                                                                                                                                                                                                  |
| "rumen552_GL0971070_1 [gene] locus=scaffold819020_2:542:1372:-[Lack 5'-end]"                                                                                                                                                                                                                                                  |
| "rumen552_GL1009831_1 [gene] locus=scaffold929842_1:971:1843:+[Lack 3'-end]"                                                                                                                                                                                                                                                  |
| "rumen552_GL1052702_1 [gene] locus=scaffold415999_7:2:424:+[Lack 5'-end]",<br>"rumen583_GL0332362_1 [gene] locus=scaffold276361_3:129:551:-[Lack 5'-end]"                                                                                                                                                                     |
| "rumen552_GL1084015_1 [gene] locus=scaffold415671_1:1:498:+[Lack 5'-end]"                                                                                                                                                                                                                                                     |
| "rumen552_GL1191896_1 [gene] locus=scaffold293306_1:1:759:+[Lack both ends]"                                                                                                                                                                                                                                                  |
| "rumen552_GL1197944_1 [gene] locus=scaffold536502_1:1:693:+[Lack 5'-end]"                                                                                                                                                                                                                                                     |
| "rumen552_GL1201600_1 [gene] locus=scaffold310905_2:98:706:-[Lack 5'-end]"                                                                                                                                                                                                                                                    |
| "rumen552_GL1225439_1 [gene] locus=scaffold907183_2:580:1533:+[Complete]"                                                                                                                                                                                                                                                     |
| "rumen552_GL1380265_1 [gene] locus=scaffold319829_1:35:592:+[Lack 3'-end]"                                                                                                                                                                                                                                                    |
| "rumen552_GL1433053_1 [gene] locus=scaffold689479_1:131:1114:-[Complete]",<br>"rumen3042_GL2654465_1 [gene] locus=C52108410_1:3:986:-[Complete]"                                                                                                                                                                              |
| "rumen552_GL1436514_1 [gene] locus=scaffold854013_2:1:792:-[Lack both ends]"                                                                                                                                                                                                                                                  |
| "rumen552_GL1440013_1 [gene] locus=scaffold203264_1:1:525:+[Lack both ends]"                                                                                                                                                                                                                                                  |
| "rumen552_GL1448832_1 [gene] locus=scaffold36046_2:4965:5945:-[Complete]",<br>"rumen555_GL1692780_1 [gene] locus=scaffold1082603_1:3593:4573:-[Complete]",<br>"rumen0081_GL0514064_1 [gene] locus=scaffold5614_1:15852:16832:+[Complete]",<br>"rumen2009040_GL1128095_1 [gene] locus=scaffold1210743_4:2646:3626:+[Complete]" |
| "rumen552_GL1716125_1 [gene] locus=scaffold604095_1:890:1825:+[Lack 3'-end]",<br>"rumen0081_GL1743851_1 [gene] locus=C39230363_1:1:936:+[Lack both ends]"                                                                                                                                                                     |
| "rumen553_GL0025785_1 [gene] locus=scaffold425815_1:5427:6446:+[Complete]"                                                                                                                                                                                                                                                    |
| "rumen553_GL0075427_1 [gene] locus=scaffold206980_7:3:1043:-[Lack 3'-end]"                                                                                                                                                                                                                                                    |
| "rumen553_GL0080409_1 [gene] locus=scaffold389397_1:1515:1895:-[Lack 5'-end]"                                                                                                                                                                                                                                                 |
| "rumen553_GL0136563_1 [gene] locus=scaffold102846_5:6711:7706:-[Complete]"                                                                                                                                                                                                                                                    |
| "rumen553_GL0154606_1 [gene] locus=scaffold44886_1:631:1284:+[Lack 3'-end]"                                                                                                                                                                                                                                                   |
| "rumen553_GL0168381_1 [gene] locus=C7189224_1:3:626:-[Lack both ends]"                                                                                                                                                                                                                                                        |
| "rumen553_GL0205981_1 [gene] locus=scaffold231762_4:1:561:-[Lack both ends]"                                                                                                                                                                                                                                                  |
| "rumen553_GL0237933_1 [gene] locus=C7292662_1:72:728:+[Lack 3'-end]"                                                                                                                                                                                                                                                          |
| "rumen553_GL0248359_1 [gene] locus=scaffold365127_1:57477:58466:+[Complete]"                                                                                                                                                                                                                                                  |

|                                                                                                                                                                                                                                                                                                                               |
|-------------------------------------------------------------------------------------------------------------------------------------------------------------------------------------------------------------------------------------------------------------------------------------------------------------------------------|
| "rumen554_GL2107679_1 [gene] locus=scaffold8791_1:283:1272:+[Complete]"                                                                                                                                                                                                                                                       |
| "rumen553_GL0298504_1 [gene] locus=scaffold297784_1:3:482:+[Lack 5'-end]"                                                                                                                                                                                                                                                     |
| "rumen553_GL0349357_1 [gene] locus=scaffold352537_1:1:984:+[Lack 5'-end]"                                                                                                                                                                                                                                                     |
| "rumen553_GL0351392_1 [gene] locus=scaffold8660_5:650:1603:-[Lack 5'-end]"                                                                                                                                                                                                                                                    |
| "rumen553_GL0487595_1 [gene] locus=scaffold347884_1:709:1212:-[Lack 5'-end]"                                                                                                                                                                                                                                                  |
| "rumen553_GL0520057_1 [gene] locus=scaffold32864_1:995:1603:-[Lack 5'-end]"                                                                                                                                                                                                                                                   |
| "rumen553_GL0578661_1 [gene] locus=scaffold287449_2:380:1045:+[Lack 3'-end]"                                                                                                                                                                                                                                                  |
| "rumen553_GL0586781_1 [gene] locus=scaffold68115_1:2380:3102:+[Lack 3'-end]"                                                                                                                                                                                                                                                  |
| "rumen553_GL0631439_1 [gene] locus=scaffold32864_2:1:519:-[Lack 3'-end]"                                                                                                                                                                                                                                                      |
| "rumen553_GL0683379_1 [gene] locus=scaffold48905_1:159:785:+[Lack 3'-end]"                                                                                                                                                                                                                                                    |
| "rumen553_GL0695754_1 [gene] locus=scaffold233965_1:19995:21014:-[Complete]",<br>"rumen553_GL0791971_1 [gene] locus=scaffold157426_1:3740:4759:-[Complete]",<br>"rumen553_GL0937811_1 [gene] locus=scaffold196973_1:3721:4740:-[Complete]",<br>"rumen100058_GL2555908_1 [gene] locus=scaffold3356328_2:2223:3242:+[Complete]" |
| "rumen553_GL0758216_1 [gene] locus=scaffold319491_4:461:1012:+[Lack 3'-end]"                                                                                                                                                                                                                                                  |
| "rumen553_GL0775514_1 [gene] locus=scaffold310536_1:1:828:-[Lack 3'-end]"                                                                                                                                                                                                                                                     |
| "rumen553_GL0818756_1 [gene] locus=scaffold410882_1:3:563:-[Lack 3'-end]"                                                                                                                                                                                                                                                     |
| "rumen553_GL0846785_1 [gene] locus=scaffold2814_1:21934:22956:-[Complete]"                                                                                                                                                                                                                                                    |
| "rumen553_GL0872238_1 [gene] locus=scaffold284531_3:10345:11331:-[Complete]"                                                                                                                                                                                                                                                  |
| "rumen553_GL0881765_1 [gene] locus=scaffold77855_1:2:739:-[Lack 3'-end]"                                                                                                                                                                                                                                                      |
| "rumen553_GL0882230_1 [gene] locus=scaffold280520_4:3626:4585:+[Complete]"                                                                                                                                                                                                                                                    |
| "rumen553_GL0891354_1 [gene] locus=scaffold412990_1:1501:2559:+[Complete]"                                                                                                                                                                                                                                                    |
| "rumen553_GL0917057_1 [gene] locus=scaffold217147_1:710:1123:-[Complete]"                                                                                                                                                                                                                                                     |
| "rumen553_GL0923912_1 [gene] locus=scaffold434298_1:1916:2890:+[Complete]",<br>"rumen555_GL2097775_1 [gene] locus=scaffold587155_4:14857:15831:-[Complete]",<br>"rumen100058_GL0363974_1 [gene] locus=scaffold700814_2:331:1305:-[Complete]"                                                                                  |
| "rumen553_GL0934327_1 [gene] locus=C7100456_1:1:561:+[Lack both ends]"                                                                                                                                                                                                                                                        |
| "rumen554_GL0138702_1 [gene] locus=scaffold1407868_2:226:1122:+[Lack 3'-end]"                                                                                                                                                                                                                                                 |
| "rumen554_GL0188161_1 [gene] locus=scaffold908510_1:376:1365:+[Lack 3'-end]"                                                                                                                                                                                                                                                  |
| "rumen554_GL0209651_1 [gene] locus=scaffold985276_1:4063:5079:+[Complete]",<br>"rumen2009040_GL3346427_1 [gene] locus=scaffold400904_7:1409:2425:+[Complete]"                                                                                                                                                                 |
| "rumen554_GL0216523_1 [gene] locus=scaffold1053227_2:3:941:+[Lack 5'-end]"                                                                                                                                                                                                                                                    |
| "rumen554_GL0271653_1 [gene] locus=C41038322_1:1:1047:+[Lack 5'-end]"                                                                                                                                                                                                                                                         |
| "rumen554_GL0276839_1 [gene] locus=scaffold1257514_2:3:569:-[Lack both ends]"                                                                                                                                                                                                                                                 |
| "rumen554_GL0295893_1 [gene] locus=scaffold2037770_1:3:575:+[Lack both ends]"                                                                                                                                                                                                                                                 |
| "rumen554_GL0346335_1 [gene] locus=scaffold1908839_1:2:598:-[Lack 3'-end]"                                                                                                                                                                                                                                                    |
| "rumen554_GL0413060_1 [gene] locus=scaffold1832768_2:2089:3090:-[Complete]",<br>"rumen555_GL1510587_1 [gene] locus=scaffold593271_5:1738:2739:+[Complete]",<br>"rumen0081_GL0338794_1 [gene] locus=scaffold1190223_1:4567:5568:+[Complete]"                                                                                   |
| "rumen554_GL0487410_1 [gene] locus=scaffold2065399_1:1:612:-[Lack both ends]"                                                                                                                                                                                                                                                 |
| "rumen554_GL0512500_1 [gene] locus=scaffold1634016_1:3:464:+[Lack 5'-end]",<br>"rumen554_GL2093825_1 [gene] locus=scaffold1423172_2:1:462:+[Lack 5'-end]"                                                                                                                                                                     |
| "rumen554_GL0522957_1 [gene] locus=scaffold513938_1:2357:3331:+[Complete]"                                                                                                                                                                                                                                                    |

|                                                                                                                                                                                                                                                    |
|----------------------------------------------------------------------------------------------------------------------------------------------------------------------------------------------------------------------------------------------------|
| "rumen3042_GL0386703_1 [gene] locus=scaffold1839576_1:19:993:-[Complete]"                                                                                                                                                                          |
| "rumen554_GL0594724_1 [gene] locus=scaffold182826_1:3:725:-[Lack 3'-end]"                                                                                                                                                                          |
| "rumen554_GL0656150_1 [gene] locus=scaffold1051268_4:351:1439:-[Lack 5'-end]"                                                                                                                                                                      |
| "rumen554_GL0687567_1 [gene] locus=scaffold1598446_2:3:911:+[Lack 5'-end]",<br>"rumen2009040_GL0482909_1 [gene] locus=scaffold2776935_2:3:911:+[Lack 5'-end]"                                                                                      |
| "rumen554_GL0786729_1 [gene] locus=scaffold294875_3:62:604:-[Lack 5'-end]"                                                                                                                                                                         |
| "rumen554_GL0888247_1 [gene] locus=scaffold2059249_1:973:1815:+[Lack 3'-end]"                                                                                                                                                                      |
| "rumen554_GL1045616_1 [gene] locus=scaffold1334142_5:3:782:-[Lack 3'-end]"                                                                                                                                                                         |
| "rumen554_GL1053069_1 [gene] locus=scaffold1326175_5:3:545:+[Lack both ends]",<br>"rumen0081_GL1498336_1 [gene] locus=scaffold885327_5:1:543:-[Lack 3'-end]",<br>"rumen2009040_GL2321236_1 [gene] locus=scaffold1136922_1:3:545:+[Lack both ends]" |
| "rumen554_GL1074659_1 [gene] locus=scaffold1700773_2:3:881:-[Lack 5'-end]"                                                                                                                                                                         |
| "rumen554_GL1084182_1 [gene] locus=C40945874_1:3:1001:-[Lack both ends]"                                                                                                                                                                           |
| "rumen554_GL1106767_1 [gene] locus=scaffold923869_1:382:1185:-[Lack 5'-end]"                                                                                                                                                                       |
| "rumen554_GL1289582_1 [gene] locus=C40465960_1:3:773:+[Lack both ends]"                                                                                                                                                                            |
| "rumen554_GL1290684_1 [gene] locus=scaffold2153745_1:3:452:+[Lack 5'-end]"                                                                                                                                                                         |
| "rumen554_GL1291809_1 [gene] locus=scaffold997847_2:337:1263:+[Lack 3'-end]"                                                                                                                                                                       |
| "rumen554_GL1306149_1 [gene] locus=scaffold2067455_1:3:851:+[Lack 5'-end]"                                                                                                                                                                         |
| "rumen554_GL1332124_1 [gene] locus=scaffold1245999_2:3:689:+[Lack both ends]"                                                                                                                                                                      |
| "rumen554_GL1389302_1 [gene] locus=scaffold1282684_2:1:462:-[Lack 3'-end]"                                                                                                                                                                         |
| "rumen554_GL1486333_1 [gene] locus=scaffold2184403_1:979:1899:-[Complete]"                                                                                                                                                                         |
| "rumen554_GL1546605_1 [gene] locus=scaffold1773484_2:151:558:+[Lack 3'-end]",<br>"rumen100058_GL3811027_1 [gene] locus=scaffold3239136_1:122:529:+[Lack 3'-end]"                                                                                   |
| "rumen554_GL1552216_1 [gene] locus=scaffold977727_1:1552:2214:+[Lack 3'-end]",<br>"rumen554_GL3085806_1 [gene] locus=scaffold1441392_1:739:1401:+[Lack 3'-end]"                                                                                    |
| "rumen554_GL1564068_1 [gene] locus=scaffold140049_3:3:911:+[Lack 5'-end]"                                                                                                                                                                          |
| "rumen554_GL1596247_1 [gene] locus=scaffold623243_2:2:922:+[Lack 5'-end]"                                                                                                                                                                          |
| "rumen554_GL1680904_1 [gene] locus=scaffold1049950_2:1:687:+[Lack 5'-end]"                                                                                                                                                                         |
| "rumen554_GL1691418_1 [gene] locus=scaffold1964144_2:1:762:-[Lack 3'-end]"                                                                                                                                                                         |
| "rumen554_GL1699031_1 [gene] locus=scaffold1761210_1:2:661:-[Lack 3'-end]"                                                                                                                                                                         |
| "rumen554_GL1752435_1 [gene] locus=scaffold966121_1:2:592:-[Lack both ends]"                                                                                                                                                                       |
| "rumen554_GL1858283_1 [gene] locus=scaffold569612_1:145:609:+[Lack 3'-end]"                                                                                                                                                                        |
| "rumen554_GL1886028_1 [gene] locus=scaffold169248_4:3:833:+[Lack 5'-end]"                                                                                                                                                                          |
| "rumen554_GL1942394_1 [gene] locus=scaffold48403_2:923:1762:+[Lack 3'-end]"                                                                                                                                                                        |
| "rumen554_GL2007459_1 [gene] locus=scaffold514724_2:1:534:-[Lack 3'-end]"                                                                                                                                                                          |
| "rumen554_GL2180132_1 [gene] locus=scaffold1350098_1:392:982:+[Lack 3'-end]",<br>"rumen7049_GL0208732_1 [gene] locus=scaffold1779539_1:58:648:+[Lack 3'-end]"                                                                                      |
| "rumen554_GL2181202_1 [gene] locus=scaffold1993307_1:3:521:-[Lack both ends]"                                                                                                                                                                      |
| "rumen554_GL2204014_1 [gene] locus=scaffold168929_2:243:698:-[Lack 5'-end]"                                                                                                                                                                        |
| "rumen554_GL2320728_1 [gene] locus=scaffold1657544_1:165:1064:+[Lack 3'-end]"                                                                                                                                                                      |
| "rumen554_GL2333867_1 [gene] locus=scaffold172759_4:1:528:+[Lack both ends]"                                                                                                                                                                       |
| "rumen554_GL2381327_1 [gene] locus=scaffold896143_1:2:841:-[Lack both ends]",<br>"rumen100058_GL1849897_1 [gene] locus=scaffold1014378_2:138:980:-[Lack 5'-end]"                                                                                   |

|                                                                                                                                                                                                                                                                                                                                                                                                                                                                                                                                                                         |
|-------------------------------------------------------------------------------------------------------------------------------------------------------------------------------------------------------------------------------------------------------------------------------------------------------------------------------------------------------------------------------------------------------------------------------------------------------------------------------------------------------------------------------------------------------------------------|
| ["rumen554_GL2419500_1 [gene] locus=scaffold629415_3:2:1027:+[Lack 5'-end]"]                                                                                                                                                                                                                                                                                                                                                                                                                                                                                            |
| ["rumen554_GL2430171_1 [gene] locus=scaffold37293_4:2434:3495:+[Complete]"]                                                                                                                                                                                                                                                                                                                                                                                                                                                                                             |
| ["rumen554_GL2538378_1 [gene] locus=scaffold618786_1:1345:2427:-[Complete]"]                                                                                                                                                                                                                                                                                                                                                                                                                                                                                            |
| ["rumen554_GL2569972_1 [gene] locus=scaffold519696_2:3:515:+[Lack both ends]"]                                                                                                                                                                                                                                                                                                                                                                                                                                                                                          |
| ["rumen554_GL2594229_1 [gene] locus=scaffold148046_3:3:677:-[Lack both ends]"]                                                                                                                                                                                                                                                                                                                                                                                                                                                                                          |
| ["rumen554_GL2685462_1 [gene] locus=scaffold1675218_5:1419:2237:-[Lack 5'-end]"]                                                                                                                                                                                                                                                                                                                                                                                                                                                                                        |
| ["rumen554_GL2858882_1 [gene] locus=scaffold536857_2:2022:2966:+[Complete]"]                                                                                                                                                                                                                                                                                                                                                                                                                                                                                            |
| ["rumen554_GL3011202_1 [gene] locus=scaffold281160_1:3:602:+[Lack both ends]"]                                                                                                                                                                                                                                                                                                                                                                                                                                                                                          |
| ["rumen554_GL3041864_1 [gene] locus=scaffold1113550_1:3:515:+[Lack both ends]"]                                                                                                                                                                                                                                                                                                                                                                                                                                                                                         |
| ["rumen555_GL0049897_1 [gene] locus=scaffold950560_1:2163:3146:-[Complete]",<br>"rumen555_GL1918340_1 [gene] locus=scaffold43756_2:362:1345:-[Complete]",<br>"rumen0081_GL1273748_1 [gene] locus=scaffold1500703_2:1198:2181:+[Complete]",<br>"rumen0081_GL2044562_1 [gene] locus=scaffold379348_2:1775:2758:-[Complete]",<br>"rumen3042_GL2436629_1 [gene] locus=scaffold1565584_1:299:1282:-[Complete]",<br>"rumen7049_GL0845113_1 [gene] locus=scaffold1942404_1:765:1748:-[Complete]",<br>"rumen7049_GL1603343_1 [gene] locus=scaffold950038_1:16:999:+[Complete]"] |
| ["rumen555_GL0083119_1 [gene] locus=scaffold1326084_2:3:509:+[Lack both ends]"]                                                                                                                                                                                                                                                                                                                                                                                                                                                                                         |
| ["rumen555_GL0153393_1 [gene] locus=scaffold648523_2:138:707:-[Lack 5'-end]"]                                                                                                                                                                                                                                                                                                                                                                                                                                                                                           |
| ["rumen555_GL0344450_1 [gene] locus=scaffold681804_1:2:898:-[Lack 3'-end]"]                                                                                                                                                                                                                                                                                                                                                                                                                                                                                             |
| ["rumen555_GL0421868_1 [gene] locus=C27783126_1:2:583:-[Lack 3'-end]"]                                                                                                                                                                                                                                                                                                                                                                                                                                                                                                  |
| ["rumen555_GL0429628_1 [gene] locus=scaffold315835_2:1:534:-[Lack both ends]"]                                                                                                                                                                                                                                                                                                                                                                                                                                                                                          |
| ["rumen555_GL0484815_1 [gene] locus=scaffold220815_1:2:883:+[Lack 5'-end]"]                                                                                                                                                                                                                                                                                                                                                                                                                                                                                             |
| ["rumen555_GL0512705_1 [gene] locus=scaffold81084_1:4206:5255:+[Complete]"]                                                                                                                                                                                                                                                                                                                                                                                                                                                                                             |
| ["rumen555_GL0604705_1 [gene] locus=scaffold1587368_1:4744:5214:-[Lack 5'-end]",<br>"rumen555_GL2027931_1 [gene] locus=scaffold864373_3:432:902:-[Lack 5'-end]"]                                                                                                                                                                                                                                                                                                                                                                                                        |
| ["rumen555_GL0648913_1 [gene] locus=scaffold483787_2:430:1455:-[Complete]",<br>"rumen0081_GL0214676_1 [gene] locus=scaffold568171_2:13847:14872:+[Complete]"]                                                                                                                                                                                                                                                                                                                                                                                                           |
| ["rumen555_GL0707718_1 [gene] locus=scaffold1539616_1:1:366:-[Lack 3'-end]"]                                                                                                                                                                                                                                                                                                                                                                                                                                                                                            |
| ["rumen555_GL0797869_1 [gene] locus=scaffold173345_1:317:1045:-[Lack 5'-end]"]                                                                                                                                                                                                                                                                                                                                                                                                                                                                                          |
| ["rumen555_GL0818579_1 [gene] locus=scaffold566320_1:3:725:+[Lack both ends]"]                                                                                                                                                                                                                                                                                                                                                                                                                                                                                          |
| ["rumen555_GL0845101_1 [gene] locus=scaffold1401950_2:615:1463:-[Lack 5'-end]"]                                                                                                                                                                                                                                                                                                                                                                                                                                                                                         |
| ["rumen555_GL0896488_1 [gene] locus=scaffold1067912_1:65:673:+[Lack 3'-end]"]                                                                                                                                                                                                                                                                                                                                                                                                                                                                                           |
| ["rumen555_GL0897443_1 [gene] locus=scaffold1307507_1:676:1293:-[Lack 5'-end]"]                                                                                                                                                                                                                                                                                                                                                                                                                                                                                         |
| ["rumen555_GL0934013_1 [gene] locus=scaffold1273003_2:541:1140:-[Lack 5'-end]"]                                                                                                                                                                                                                                                                                                                                                                                                                                                                                         |
| ["rumen555_GL1214084_1 [gene] locus=scaffold82015_1:110:571:+[Lack 3'-end]"]                                                                                                                                                                                                                                                                                                                                                                                                                                                                                            |
| ["rumen555_GL1264915_1 [gene] locus=scaffold546110_2:2:730:+[Lack 5'-end]"]                                                                                                                                                                                                                                                                                                                                                                                                                                                                                             |
| ["rumen555_GL1276327_1 [gene] locus=scaffold663978_2:3:662:+[Lack both ends]"]                                                                                                                                                                                                                                                                                                                                                                                                                                                                                          |
| ["rumen555_GL1343406_1 [gene] locus=scaffold384420_1:3:512:+[Lack both ends]"]                                                                                                                                                                                                                                                                                                                                                                                                                                                                                          |
| ["rumen555_GL1433997_1 [gene] locus=scaffold239327_1:2:490:+[Lack 5'-end]",<br>"rumen2009040_GL1177891_1 [gene] locus=scaffold2940965_1:1:489:+[Lack 5'-end]"]                                                                                                                                                                                                                                                                                                                                                                                                          |
| ["rumen555_GL1456295_1 [gene] locus=scaffold1111929_1:2:508:-[Lack both ends]"]                                                                                                                                                                                                                                                                                                                                                                                                                                                                                         |
| ["rumen555_GL149522_1 [gene] locus=scaffold745838_1:2:646:-[Lack 3'-end]"]                                                                                                                                                                                                                                                                                                                                                                                                                                                                                              |
| ["rumen555_GL1541124_1 [gene] locus=scaffold1013143_2:656:1306:+[Lack 3'-end]",                                                                                                                                                                                                                                                                                                                                                                                                                                                                                         |

|                                                                                |
|--------------------------------------------------------------------------------|
| "rumen2009040_GL0831948_1 [gene] locus=scaffold1501331_1:3:653:-[Lack 3'-end]" |
| "rumen555_GL1566027_1 [gene] locus=scaffold161735_3:1:546:+[Lack both ends]"   |
| "rumen555_GL1819046_1 [gene] locus=scaffold108362_1:13152:14216:+[Complete]"   |
| "rumen555_GL1947555_1 [gene] locus=scaffold838986_3:2:505:+[Lack both ends]"   |
| "rumen555_GL2015365_1 [gene] locus=scaffold1579934_1:4008:4703:-[Lack 5'-end]" |
| "rumen555_GL2018653_1 [gene] locus=scaffold451620_1:2:592:-[Lack 3'-end]"      |
| "rumen555_GL2153281_1 [gene] locus=scaffold668923_4:600:1079:-[Lack 5'-end]"   |
| "rumen555_GL2160909_1 [gene] locus=scaffold357577_1:3:992:-[Lack 3'-end]"      |
| "rumen555_GL2231739_1 [gene] locus=scaffold672646_3:3:551:-[Lack both ends]"   |
| "rumen555_GL2305192_1 [gene] locus=scaffold52641_2:160:1065:+[Lack 3'-end]"    |
| "rumen555_GL2310630_1 [gene] locus=scaffold689420_1:1808:2665:+[Lack 3'-end]"  |
| "rumen555_GL2318656_1 [gene] locus=scaffold1577776_1:1675:2454:+[Lack 3'-end]" |
| "rumen555_GL2345539_1 [gene] locus=scaffold21142_2:6235:7278:+[Complete]"      |
| "rumen555_GL2418108_1 [gene] locus=scaffold1515378_1:2:544:+[Lack both ends]"  |
| "rumen555_GL2427390_1 [gene] locus=scaffold1315192_2:3:893:+[Lack 5'-end]"     |
| "rumen555_GL2510502_1 [gene] locus=scaffold74091_1:365:1093:+[Lack 3'-end]"    |
| "rumen583_GL0016108_1 [gene] locus=scaffold10500_5:431:1423:-[Complete]"       |
| "rumen583_GL0019139_1 [gene] locus=scaffold69391_16:3:725:+[Lack both ends]"   |
| "rumen583_GL0083314_1 [gene] locus=C5090830_1:3:488:-[Lack 3'-end]"            |
| "rumen583_GL0092370_1 [gene] locus=scaffold224822_3:17635:18684:+[Complete]"   |
| "rumen583_GL0151880_1 [gene] locus=scaffold275785_2:2:583:+[Lack both ends]"   |
| "rumen583_GL0182159_1 [gene] locus=scaffold1284_3:3:821:+[Lack 5'-end]"        |
| "rumen583_GL0183524_1 [gene] locus=scaffold81430_1:1:522:+[Lack both ends]"    |
| "rumen583_GL0271792_1 [gene] locus=C5234690_1:2:586:+[Lack 5'-end]",           |
| "rumen554_GL2065060_1 [gene] locus=C39950904_1:1:585:+[Lack 5'-end]"           |
| "rumen583_GL0291504_1 [gene] locus=scaffold25451_4:2:595:+[Lack 5'-end]"       |
| "rumen583_GL0316776_1 [gene] locus=scaffold18285_2:7328:8341:+[Complete]"      |
| "rumen583_GL0319058_1 [gene] locus=scaffold263136_1:1:654:+[Lack both ends]"   |
| "rumen583_GL0396177_1 [gene] locus=scaffold102_1:13768:14760:-[Complete]"      |
| "rumen583_GL0435588_1 [gene] locus=scaffold100224_4:2:499:+[Lack both ends]"   |
| "rumen583_GL0437819_1 [gene] locus=scaffold20151_6:1:690:+[Lack 5'-end]"       |
| "rumen583_GL0496825_1 [gene] locus=scaffold335338_1:674:1801:-[Complete]"      |
| "rumen583_GL0500606_1 [gene] locus=scaffold275354_2:3:878:+[Lack 5'-end]"      |
| "rumen583_GL0598887_1 [gene] locus=scaffold42773_3:1730:2170:-[Lack 5'-end]"   |
| "rumen583_GL0629430_1 [gene] locus=scaffold26514_10:2:841:-[Lack 3'-end]"      |
| "rumen583_GL0639840_1 [gene] locus=scaffold111711_3:23:613:-[Lack 5'-end]"     |
| "rumen583_GL0668222_1 [gene] locus=scaffold326943_1:3:590:-[Lack both ends]"   |
| "rumen583_GL0701828_1 [gene] locus=scaffold131765_1:747:1193:-[Lack 5'-end]"   |
| "rumen583_GL0748094_1 [gene] locus=scaffold310884_1:27:1097:-[Complete]"       |
| "rumen583_GL0771066_1 [gene] locus=scaffold187279_1:3:611:-[Lack both ends]"   |
| "rumen583_GL0778639_1 [gene] locus=scaffold244346_1:67:939:+[Lack 3'-end]"     |
| "rumen583_GL0787681_1 [gene] locus=scaffold115326_1:3775:4722:+[Complete]"     |
| "rumen7049_GL0117431_1 [gene] locus=scaffold1138349_1:2:721:+[Lack 5'-end]"    |

|                                                                                   |
|-----------------------------------------------------------------------------------|
| ["rumen7049_GL0158322_1 [gene] locus=scaffold1437026_1:3:401:-[Lack 3'-end]"]     |
| ["rumen7049_GL0296794_1 [gene] locus=C51326938_1:50:529:+[Lack 3'-end]"]          |
| ["rumen7049_GL0374971_1 [gene] locus=scaffold2218975_1:3:821:-[Lack 3'-end]"]     |
| ["rumen7049_GL0453631_1 [gene] locus=scaffold1773472_3:421:849:-[Lack 5'-end]"]   |
| ["rumen7049_GL0608548_1 [gene] locus=C52414850_1:53:760:+[Lack 3'-end]"]          |
| ["rumen7049_GL0704107_1 [gene] locus=scaffold1603165_2:3:48:1025:-[Lack 5'-end]"] |
| ["rumen7049_GL0751922_1 [gene] locus=scaffold706614_2:2:649:+[Lack both ends]"]   |
| ["rumen7049_GL0757384_1 [gene] locus=scaffold430277_1:150:1262:+[Lack 3'-end]"]   |
| ["rumen7049_GL1171663_1 [gene] locus=scaffold2128948_1:239:868:+[Lack 3'-end]"]   |
| ["rumen7049_GL1375179_1 [gene] locus=scaffold324796_1:713:1741:+[Complete]"]      |
| ["rumen7049_GL1461620_1 [gene] locus=scaffold1399925_1:3:884:-[Lack 3'-end]"]     |
| ["rumen7049_GL1487928_1 [gene] locus=C53276822_1:751:1569:+[Lack 3'-end]"]        |
| ["rumen7049_GL1590079_1 [gene] locus=scaffold908729_3:515:994:-[Lack 5'-end]"]    |
| ["rumen7049_GL1610216_1 [gene] locus=scaffold1755913_1:3:506:+[Lack 5'-end]"]     |
| ["rumen7049_GL1883047_1 [gene] locus=scaffold511205_1:273:728:-[Lack 5'-end]"]    |
| ["rumen7049_GL1901348_1 [gene] locus=scaffold1594254_1:2:820:-[Lack both ends]"]  |
| ["rumen7049_GL2118237_1 [gene] locus=scaffold1642567_1:426:896:+[Lack 3'-end]"]   |
| ["rumen7049_GL2152036_1 [gene] locus=scaffold207751_3:52:540:-[Lack 5'-end]"]     |
| ["rumen7049_GL2158537_1 [gene] locus=scaffold472765_4:1:612:+[Lack 5'-end]"]      |
| ["rumen7049_GL2456196_1 [gene] locus=scaffold407158_2:150:983:+[Lack 3'-end]"]    |
| ["rumen7049_GL2603710_1 [gene] locus=C52626822_1:31:849:-[Lack 5'-end]"]          |
| ["rumen7049_GL2651904_1 [gene] locus=scaffold17328_2:2:916:+[Lack 5'-end]"]       |
| ["rumen7049_GL2706827_1 [gene] locus=scaffold1205539_1:3:530:-[Lack both ends]"]  |
| ["rumen7049_GL2804593_1 [gene] locus=scaffold569104_1:3:779:+[Lack 5'-end]"]      |

### C3

|                                                                                                                                                                                                                                                                                                                                                                                                                                                                                                                                                                                                                                                                                                                                                                                                                                                               |
|---------------------------------------------------------------------------------------------------------------------------------------------------------------------------------------------------------------------------------------------------------------------------------------------------------------------------------------------------------------------------------------------------------------------------------------------------------------------------------------------------------------------------------------------------------------------------------------------------------------------------------------------------------------------------------------------------------------------------------------------------------------------------------------------------------------------------------------------------------------|
| ["cazyCCgij156109243 gb EDO10988.1 β-1", "2-mannosidase_hypothetical protein BACOVA_03624 [Bacteroides ovatus ATCC 8483]";<br>"cazy SCV07919.1 secreted hypothetical protein [Bacteroides ovatus V975]";<br>"cazygij938484278 gb ALJ48509.1  Beta-1", "4-mannooligosaccharide phosphorylase [Bacteroides ovatus]";<br>"cazygij295088161 emb CBK69684.1  Predicted glycosylase [Bacteroides xylanisolvens XB1A]"]                                                                                                                                                                                                                                                                                                                                                                                                                                              |
| ["cazyCCgij254949689 gb ACT94389.1 β-1", "2-mannosidase_glycosidase PH1107-related [Dyadobacter fermentans DSM 18053]"]                                                                                                                                                                                                                                                                                                                                                                                                                                                                                                                                                                                                                                                                                                                                       |
| ["cazyCCgij29341096 gb AAO78885.1 β-1", "2-mannosidase_putative glycosidase", " PH117-related [Bacteroides thetaiotaomicron VPI-5482]";<br>"humangutMH0041_GL0075740 [gene] locus=scaffold7438_6:102:1253:+ [Complete] codon-table.11";<br>"humangutMH0266_GL0124116 [gene] locus=scaffold1405_1:4558:5709:+ [Complete] codon-table.11";<br>"humangutT2D-135A_GL0063918 [gene] locus=scaffold53973_1:3589:4740:+ [Complete] codon-table.11";<br>"mouseS-Fe10_GL0001513 [gene] locus=scaffold1118_3:596:1747:+ [Complete] codon-table.11";<br>"mouse1A-dyr3-06_GL0015591 [gene] locus=scaffold1150_2:2092:3243:- [Complete] codon-table.11";<br>"cazygij1045271614 gb ANU56305.1  hypothetical protein A4V03_00905 [Bacteroides sp. I48]";<br>"cazygij938479793 gb ALJ44025.1  Beta-1", "4-mannooligosaccharide phosphorylase [Bacteroides thetaiotaomicron]"] |
| ["cazygij1006704447 gb AMQ56248.1  pesticidal protein Cry15Aa [Algoriphagus sp. M8-2]"]                                                                                                                                                                                                                                                                                                                                                                                                                                                                                                                                                                                                                                                                                                                                                                       |
| ["cazygij1008902929 gb AMR34594.1  hypothetical protein A0256_16760 [Mucilaginibacter sp. PAMC 26640]"]                                                                                                                                                                                                                                                                                                                                                                                                                                                                                                                                                                                                                                                                                                                                                       |
| ["cazygij1028469421 gb ANE52341.1  glycosidase [Flavisolibacter sp. LCS9]"]                                                                                                                                                                                                                                                                                                                                                                                                                                                                                                                                                                                                                                                                                                                                                                                   |
| ["cazygij1033842095 gb ANH82948.1  hypothetical protein A8C56_19890 [Niabella sp. BS26]"]                                                                                                                                                                                                                                                                                                                                                                                                                                                                                                                                                                                                                                                                                                                                                                     |



|                                                                                                                                                                                                                                                                                                                                           |
|-------------------------------------------------------------------------------------------------------------------------------------------------------------------------------------------------------------------------------------------------------------------------------------------------------------------------------------------|
| ["cazygi 1035430157 gb ANI89637.1  hypothetical protein A9P82_10265 [Arachidococcus sp. BS20]"]                                                                                                                                                                                                                                           |
| ["cazygi 1045274436 gb ANU59127.1  hypothetical protein A4V03_17495 [Bacteroides sp. I48]"]                                                                                                                                                                                                                                               |
| ["cazygi 116226858 gb ABJ85567.1  glycosidase", " PH1107-related [Candidatus Solibacter usitatus Ellin6076]"]                                                                                                                                                                                                                             |
| ["cazygi 167351664 gb ABZ74394.1  glycosidase PH1107-related (plasmid) [Caulobacter sp. K31]"]                                                                                                                                                                                                                                            |
| ["cazygi 18893919 gb AAL81871.1  hypothetical protein PF1747 [Pyrococcus furiosus DSM 3638],<br>"cazygi 12018068 gb AAG45396.1 AF307053_11 unknown [Thermococcus litoralis],<br>"cazygi 242264750 gb ACS89432.1  Glycosidase [Thermococcus sibiricus MM 739]"]                                                                            |
| ["cazygi 225791433 gb ACO31523.1  conserved hypothetical protein [Acidobacterium capsulatum ATCC 51196]"]                                                                                                                                                                                                                                 |
| ["cazygi 239505942 gb ACR79429.1  glycosidase PH1107-related [Kosmotoga olearia TBF 19.5.1]"]                                                                                                                                                                                                                                             |
| ["cazygi 239911180 gb ACS3407.1  Glycosylase [Thermococcus gammatolerans EJ3]"]                                                                                                                                                                                                                                                           |
| ["cazygi 256040022 gb ACU63566.1  glycosidase PH1107-related [Chitinophaga pinensis DSM 2588]"]                                                                                                                                                                                                                                           |
| ["cazygi 260062546 ref EAR15283.1  hypothetical protein RB2501_13184 [Robiginitalea biformata HTCC2501]"]                                                                                                                                                                                                                                 |
| ["cazygi 294980338 gb ADF50803.1  glycosidase", " PH1107-related protein [Zunongwangia profunda SM-A87]"]                                                                                                                                                                                                                                 |
| ["cazygi 296849618 gb ADH62633.1  glycosidase PH1107-related protein [Meiothermus silvanus DSM 9946]"]                                                                                                                                                                                                                                    |
| ["cazygi 305667514 ref YP_003863801.1  hypothetical protein FB2170_14743 [Maribacter sp. HTCC2170]"]                                                                                                                                                                                                                                      |
| ["cazygi 315592348 gb ADU51644.1  glycosidase related protein [Thermaerobacter marianensis DSM 12885]"]                                                                                                                                                                                                                                   |
| ["cazygi 319927679 gb ADV84754.1  glycosidase related protein [Terriglobus saanensis SP1PR4]"]                                                                                                                                                                                                                                            |
| ["cazygi 321164890 gb ADW70595.1  glycosidase related protein [Granulicella tundricola MP5ACTX9]"]                                                                                                                                                                                                                                        |
| ["cazygi 3257523 dbj BAA30206.1  299aa long hypothetical protein [Pyrococcus horikoshii OT3]"]                                                                                                                                                                                                                                            |
| ["cazygi 326552918 gb ADZ81303.1  glycosidase related protein [Sphingobacterium sp. 21]"]                                                                                                                                                                                                                                                 |
| ["cazygi 332333126 gb AEE50227.1  glycosidase related protein [Haliscomenobacter hydrossis DSM 1100]"]                                                                                                                                                                                                                                    |
| ["cazygi 343954774 gb AEM70573.1  glycosidase related protein [Muricauda ruestringensis DSM 13258]"]                                                                                                                                                                                                                                      |
| ["cazygi 361059038 gb AEV98029.1  glycosidase related protein [Niastellella koreensis GR20-10]"]                                                                                                                                                                                                                                          |
| ["cazygi 378567994 gb AFC28304.1  glycosidase PH1107-like protein [Paenibacillus mucilaginosus 3016],<br>"cazygi 384089041 gb AFH60477.1  glycosidase [Paenibacillus mucilaginosus K02],<br>"cazygi 336298945 gb AEI42048.1  glycosidase PH1107-related protein [Paenibacillus mucilaginosus KNP414]"]                                    |
| ["cazygi 381386860 gb BAM03676.1  hypothetical protein PSMK_15170 [Phycisphaera mikurensis NBRC 102666]"]                                                                                                                                                                                                                                 |
| ["cazygi 387855701 gb AFK03798.1  glycosidase related protein [Emticicia oligotrophica DSM 17448]"]                                                                                                                                                                                                                                       |
| ["cazygi 388249740 gb AFK22593.1  putative Glycosidase [Pyrococcus sp. ST04]"]                                                                                                                                                                                                                                                            |
| ["cazygi 390411660 gb AFL87164.1  putative glycosylase [Terriglobus roseus DSM 18391]"]                                                                                                                                                                                                                                                   |
| ["cazygi 393190195 gb AFN04893.1  hypothetical protein PFC_09860 [Pyrococcus furiosus COM1],<br>"cazygi 374742097 gb EHR78506.1  glycosidase [Thermococcus litoralis DSM 5473],<br>"cazygi 971361817 gb ALV61989.1  Glycoside hydrolase 130 family enzyme", " beta-1", "4 mannoooligosaccharide phosphorilase [Thermococcus sp. 2319x1]"] |
| ["cazygi 5458549 emb CAB50037.1  Hypothetical protein PAB1622 [Pyrococcus abyssii GE5]"]                                                                                                                                                                                                                                                  |
| ["cazygi 570745856 gb AHF16368.1  glycosidase [Niabella soli DSM 19437]"]                                                                                                                                                                                                                                                                 |
| ["cazygi 573024216 gb AHF79750.1  putative glycoside hydrolase [Thermococcus parvalvinellae]"]                                                                                                                                                                                                                                            |
| ["cazygi 663075784 gb AIE87939.1  glycosidase related protein [Fimbrimonas ginsengisoli Gsoil 348]"]                                                                                                                                                                                                                                      |
| ["cazygi 664801792 gb AIF70025.1  hypothetical protein PAP_08185 [Palaeococcus pacificus DY20341]"]                                                                                                                                                                                                                                       |
| ["cazygi 672715017 emb CDS94299.1  Glycosidase related protein [Sphingobacterium sp. PM2-P1-29]"]                                                                                                                                                                                                                                         |
| ["cazygi 744793298 gb AJC70877.1  glycosidase [Thermococcus guaymasensis DSM 11113]"]                                                                                                                                                                                                                                                     |
| ["cazygi 787938705 gb AKA35180.1  Glycosidase related protein [Muricauda lutaonensis]"]                                                                                                                                                                                                                                                   |
| ["cazygi 808696030 gb AKD56869.1  glycosidase [Spirosoma radiotolerans]"]                                                                                                                                                                                                                                                                 |
| ["cazygi 827413726 gb AKI98278.1  glycosidase [Kosmotoga pacifica]"]                                                                                                                                                                                                                                                                      |

|                                                                                                                                                                                                                                                                                  |
|----------------------------------------------------------------------------------------------------------------------------------------------------------------------------------------------------------------------------------------------------------------------------------|
| ["cazy 873497534 gb AKP53038.1  Putative glycoside hydrolase [Cyclobacterium amurskyense]"]                                                                                                                                                                                      |
| ["cazy 926468532 gb ALD22883.1  glycosidase [Hymenobacter sp. DG25A]"]                                                                                                                                                                                                           |
| ["cazy 94549995 gb ABF39919.1  glycosidase", " PH1107-related protein [Candidatus Koribacter versatilis Ellin345]"]                                                                                                                                                              |
| ["cazy 946529133 gb ALM09124.1  hypothetical protein SB49_02230 [Sediminicola sp. YIK13]"]                                                                                                                                                                                       |
| ["cazy 996010572 gb AMJ67963.1  hypothetical protein AXW84_01505 [Hymenobacter sp. PAMC 26628]"]                                                                                                                                                                                 |
| ["cazy 998619775 db BAU55708.1  Beta-1", "4-mannooligosaccharide phosphorylase [Mucilagibacter gotjawali]"]                                                                                                                                                                      |
| ["cazy APG61045.1 pesticidal protein Cry15Aa [Gramella salexigens]"]                                                                                                                                                                                                             |
| ["cazy APQ16221.1 hypothetical protein BTR34_02150 [Maribacter sp. T28]"]                                                                                                                                                                                                        |
| ["cazy APU67835.1 putative glycoside hydrolase [Gramella flava JLT2011]"]                                                                                                                                                                                                        |
| ["cazy APU97438.1 hypothetical protein BV902_14695 [Sphingobacterium sp. B29]"]                                                                                                                                                                                                  |
| ["cazy ARK09600.1 glycosidase [Fibrella sp. ES10-3-2-2]"]                                                                                                                                                                                                                        |
| ["cazy ASA78004.1 glycosidase [Thermococcus sp. 5-4]",<br>"cazy ASJ14742.1 glycosidase [Thermococcus radiotolerans]",<br>"cazy 340810641 gb AEK73798.1  Glycosylase [Thermococcus sp. 4557]"]                                                                                    |
| ["cazy ASJ05082.1 glycosidase [Thermococcus barossii]"]                                                                                                                                                                                                                          |
| ["cazy ASJ07914.1 glycosidase [Thermococcus siculi]"]                                                                                                                                                                                                                            |
| ["cazy ASJ13038.1 glycosidase [Thermococcus thioreducers]"]                                                                                                                                                                                                                      |
| ["cazy ASJ17080.1 glycosidase [Thermococcus chitonophagus]",<br>"cazy 1001992192 gb AMM53793.1  glycosidase [Pyrococcus sp. NCB100]",<br>"cazy 1019365031 emb CUX77680.1  COG2152 predicted glycoside hydrolase [Thermococcus chitonophagus]"]                                   |
| ["cazy AST55815.1 hypothetical protein C1960_21960 [Parabacteroides sp. CT06]",<br>"humangutMH0012_GL0065470 [gene] locus=scaffold7537_4:1953:3101:- [Complete] codon-table.11",<br>"mouseS-Fe1_GL0174490 [gene] locus=scaffold80917_1:43528:44676:- [Complete] codon-table.11"] |
| ["cazy ASU31942.1 hypothetical protein MuYL_0039 [Mucilagibacter sp. BJC16-A31]"]                                                                                                                                                                                                |
| ["cazy ASV31696.1 hypothetical protein CJ263_16555 [Maribacter cobaltidurans]"]                                                                                                                                                                                                  |
| ["cazy ASZ10702.1 glycosidase [Chitinophaga sp. MD30]"]                                                                                                                                                                                                                          |
| ["cazy ATL49712.1 hypothetical protein COR50_03215 [Chitinophaga caeni]"]                                                                                                                                                                                                        |
| ["cazy ATP57941.1 hypothetical protein CPT03_16470 [Pedobacter ginsengisoli]"]                                                                                                                                                                                                   |
| ["cazy AUD04348.1 glycosidase [Spirosoma pollinicola]",<br>"cazy 283818071 gb ADB39909.1  glycosidase PH1107-related protein [Spirosoma linguale DSM 74]"]                                                                                                                       |
| ["cazy AVI52417.1 glycosidase [Aureitalea sp. RR4-38]"]                                                                                                                                                                                                                          |
| ["cazy AVR44446.1 pesticidal protein Cry15Aa [Gramella sp. SH35]"]                                                                                                                                                                                                               |
| ["cazy AWL09983.1 Beta-1", "4-mannooligosaccharide phosphorylase [Pseudarcicella sp. HME7025]"]                                                                                                                                                                                  |
| ["cazy AWM35477.1 glycosidase [Hymenobacter nivis]"]                                                                                                                                                                                                                             |
| ["cazy AXC09738.1 putative glycoside hydrolase [Acidobacteriaceae bacterium SBC82]"]                                                                                                                                                                                             |
| ["cazy AXE19877.1 glycosidase [Runella sp. HYN0085]",<br>"cazy 336305538 gb AEI48640.1  glycosidase related protein [Runella slithyformis DSM 19594]"]                                                                                                                           |
| ["cazy AYB30495.1 glycosidase [Chryseolinea sp. KIS68-18]"]                                                                                                                                                                                                                      |
| ["cazy AYD47492.1 hypothetical protein D6B99_07660 [Arachidicoccus sp. KIS59-12]"]                                                                                                                                                                                               |
| ["cazy AYL95667.1 hypothetical protein HYN43_010370 [Mucilagibacter sp. HYN0043]"]                                                                                                                                                                                               |
| ["cazy AYQ36400.1 glycosidase [Runella sp. SP2]"]                                                                                                                                                                                                                                |
| ["cazy SCD19903.1 Glycosyl hydrolase families 32 and 68 [Proteiniphilum saccharofermentans]"]                                                                                                                                                                                    |
| ["cazy SCV07002.1 glycosyl hydrolase [Bacteroides ovatus V975]"]                                                                                                                                                                                                                 |

|                                                                                                                                                                                         |
|-----------------------------------------------------------------------------------------------------------------------------------------------------------------------------------------|
| "humangutMH0020_GL0014507 [gene] locus=scaffold21608_9:7559:8704:+ [Complete] codon-table.11",                                                                                          |
| "humangutMH0021_GL0015154 [gene] locus=scaffold39537_5:574:1719:+ [Complete] codon-table.11",                                                                                           |
| "humangutMH0054_GL0022277 [gene] locus=scaffold55358_3:7139:8284:+ [Complete] codon-table.11",                                                                                          |
| "humangutNLF015_GL0019781 [gene] locus=scaffold3041_1:10604:11749:- [Complete] codon-table.11",                                                                                         |
| "cazygi 938483372 gb ALJ47603.1  Beta-1", "4-mannooligosaccharide phosphorylase [Bacteroides ovatus]",                                                                                  |
| "cazygi 156110526 gb EDO12271.1  hypothetical protein BACOVA_02161 [Bacteroides ovatus ATCC 8483]"                                                                                      |
| ["cazy SCV08357.1 glycosyl hydrolase", " family 32 protein [Bacteroides ovatus V975]",                                                                                                  |
| "humangutMH0010_GL0029842 [gene] locus=scaffold7356_38:62:1195:+ [Complete] codon-table.11",                                                                                            |
| "humangutMH0041_GL0070376 [gene] locus=scaffold1298_16:5317:6450:- [Complete] codon-table.11",                                                                                          |
| "humangutMH0106_GL0099321 [gene] locus=scaffold44499_2:850:1983:- [Complete] codon-table.11",                                                                                           |
| "humangutMH0199_GL0030986 [gene] locus=scaffold5142_1:1117:2250:- [Complete] codon-table.11",                                                                                           |
| "humangutV1.CD7-0_GL0082857 [gene] locus=C639715_1:137:1270:+ [Complete] codon-table.11",                                                                                               |
| "humangutT2D-118A_GL0058838 [gene] locus=scaffold2929_3:845:1978:- [Complete] codon-table.11",                                                                                          |
| "humangut159146620-stool1_revised_scaffold7674_1_gene7987 strand:- start:610 stop:1743 length:1134 start_codon:yes stop_codon:yes gene_type:complete [Complete] codon-table.11",        |
| "humangut159227541-stool1_revised_scaffold11082_1_gene13325 strand:- start:125 stop:1258 length:1134 start_codon:yes stop_codon:yes gene_type:complete [Complete] codon-table.11",      |
| "mouse A-dyr3-06_GL0043666 [gene] locus=scaffold8255_5:62656:63789:+ [Complete] codon-table.11",                                                                                        |
| "cazygi 938484706 gb ALJ48937.1  Beta-1", "4-mannooligosaccharide phosphorylase [Bacteroides ovatus]",                                                                                  |
| "cazygi 938479426 gb ALJ43658.1  4-O-beta-D-mannosyl-D-glucose phosphorylase [Bacteroides thetaiotaomicron]",                                                                           |
| "cazygi 29341411 gb AAO79199.1  glycosidase [Bacteroides thetaiotaomicron VPI-5482]",                                                                                                   |
| "cazygi 295086662 emb CBK68185.1  Predicted glycosylase [Bacteroides xylanisolvens XB1A]"                                                                                               |
| ["cazy SDB32688.1 Predicted glycosyl hydrolase", " GH43/DUF377 family [Flavobacteriaceae bacterium MAR_2010_188]"                                                                       |
| ["cazy SDS05868.1 Predicted glycosyl hydrolase", " GH43/DUF377 family [Gramella sp. MAR_2010_147]"                                                                                      |
| ["cazy SMD42156.1 Predicted glycosyl hydrolase", " GH43/DUF377 family [Aquiflexum balticum DSM 16537]"                                                                                  |
| ["cazy SNV50569.1 Beta-xylosidase [Sphingobacterium mizutaii]"                                                                                                                          |
| ["cazy SOE20032.1 Predicted glycosyl hydrolase", " GH43/DUF377 family [Cytophagales bacterium TFI 002]"                                                                                 |
| ["cazy SSC12643.1 putative glycosylase [Mesotoga infera]",                                                                                                                              |
| "cazygi 387859460 gb AFK07551.1  putative glycosylase [Mesotoga prima MesG1.Ag.4.2]"                                                                                                    |
| ["humangut158337416-stool2_revised_C1016974_1_gene120380 strand:- start:87 stop:1787 length:1701 start_codon:no stop_codon:yes gene_type:incomplete [Lack 5'-end] codon-table.11"]      |
| ["humangut158337416-stool2_revised_C1029828_1_gene88239 strand:- start:1328 stop:2680 length:1353 start_codon:yes stop_codon:yes gene_type:complete [Complete] codon-table.11"]         |
| ["humangut158337416-stool2_revised_scaffold5531_1_gene84699 strand:- start:508 stop:1701 length:1194 start_codon:yes stop_codon:yes gene_type:complete [Complete] codon-table.11"]      |
| ["humangut159551223-stool1_revised_scaffold2984_2_gene68717 strand:+ start:3065 stop:5104 length:2040 start_codon:yes stop_codon:yes gene_type:complete [Complete] codon-table.11"]     |
| ["humangut702443.CUY_2888 [Complete]:- codon-table.11"]                                                                                                                                 |
| ["humangut763536994-stool1_revised_scaffold30524_3_gene66393 strand:- start:1 stop:1176 length:1176 start_codon:no stop_codon:no gene_type:incomplete [Lack both ends] codon-table.11"] |
| ["humangut764588959-stool1_revised_scaffold10732_1_gene99975 strand:+ start:23500 stop:25908 length:2409 start_codon:yes stop_codon:yes gene_type:complete [Complete] codon-table.11"]  |
| ["humangut764588959-stool1_revised_scaffold28890_1_gene49945 strand:- start:3 stop:818 length:816 start_codon:yes stop_codon:no gene_type:incomplete [Lack 3'-end] codon-table.11"]     |

|                                                                                                                                                                                                                                                                                                                                                                                                                                                                                                                                                                                                                                  |
|----------------------------------------------------------------------------------------------------------------------------------------------------------------------------------------------------------------------------------------------------------------------------------------------------------------------------------------------------------------------------------------------------------------------------------------------------------------------------------------------------------------------------------------------------------------------------------------------------------------------------------|
| ["humangut764588959-stool1_revised_scaffold3488_2_gene128211 strand:+ start:9758 stop:10948 length:1191 start_codon:yes stop_codon:yes gene_type:complete<br>[Complete] codon-table.11"]                                                                                                                                                                                                                                                                                                                                                                                                                                         |
| ["humangut765013792-stool1_revised_scaffold4953_1_gene23639 strand:- start:137 stop:1255 length:1119 start_codon:no stop_codon:yes gene_type:incomplete [Lack 5'-end] codon-table.11"]                                                                                                                                                                                                                                                                                                                                                                                                                                           |
| ["humangutDLF007_GL0034958 [gene] locus=scaffold6278_2:2:1150:+ [Lack 5'-end] codon-table.11"]                                                                                                                                                                                                                                                                                                                                                                                                                                                                                                                                   |
| ["humangutDOM019_GL0055493 [gene] locus=scaffold8800_7:3:482:+ [Lack 5'-end] codon-table.11"]                                                                                                                                                                                                                                                                                                                                                                                                                                                                                                                                    |
| ["humangutED9A_GL0116165 [gene] locus=C732188_1:2:1120:+ [Lack 5'-end] codon-table.11",<br>"pigPIG-093_GL0174800 [gene] locus=scaffold17146_18:602:1720:- [Complete] codon-table.11"]                                                                                                                                                                                                                                                                                                                                                                                                                                            |
| ["humangutMH0012_GL0081352 [gene] locus=scaffold48048_1:10079:11314:- [Complete] codon-table.11",<br>"pigPIG-001_GL0046149 [gene] locus=scaffold31148_1:10628:11863:- [Complete] codon-table.11"]                                                                                                                                                                                                                                                                                                                                                                                                                                |
| ["humangutMH0020_GL0038350 [gene] locus=scaffold646_7:5468:6628:+ [Complete] codon-table.11",<br>"cazygij149938150[gb]ABR44847.1 conserved hypothetical protein [Parabacteroides distasonis ATCC 8503"]                                                                                                                                                                                                                                                                                                                                                                                                                          |
| ["humangutMH0020_GL0038773 [gene] locus=scaffold33764_1:8209:9348:+ [Complete] codon-table.11",<br>"humangutMH0309_GL0091870 [gene] locus=scaffold97527_2:10171:11310:- [Complete] codon-table.11",<br>"humangutT2D-51A_GL0015257 [gene] locus=scaffold90715_2:3784:4923:+ [Complete] codon-table.11"]                                                                                                                                                                                                                                                                                                                           |
| ["humangutMH0026_GL0034282 [gene] locus=scaffold724_9:1540:2736:+ [Complete] codon-table.11",<br>"mouseS-Fe11_GL0011000 [gene] locus=scaffold2607_1:980:2176:+ [Complete] codon-table.11"]                                                                                                                                                                                                                                                                                                                                                                                                                                       |
| ["humangutMH0041_GL0041441 [gene] locus=scaffold16152_2:309:1457:- [Complete] codon-table.11",<br>"humangutMH0094_GL0100167 [gene] locus=scaffold70088_2:1210:2358:+ [Complete] codon-table.11",<br>"humangutMH0101_GL0016856 [gene] locus=scaffold61835_1:25127:26275:+ [Complete] codon-table.11",<br>"humangutMH0333_GL0042919 [gene] locus=scaffold52124_1:37755:38903:- [Complete] codon-table.11",<br>"mouse1A-dyr3-06_GL0009044 [gene] locus=scaffold13200_1:35730:36878:+ [Complete] codon-table.11",<br>"cazygij938475581[gb]ALJ39813.1  Beta-1", "4-mannooligosaccharide phosphorylase [Bacteroides thetaiotaomicron"] |
| ["humangutMH0051_GL0007813 [gene] locus=scaffold46064_2:179:1348:- [Lack 5'-end] codon-table.11",<br>"humangutMH0085_GL0010429 [gene] locus=scaffold7997_4:3200:4369:+ [Complete] codon-table.11",<br>"cazygij939201713[gb]ALJ59886.1  Beta-1", "4-mannooligosaccharide phosphorylase [Bacteroides cellulosilyticus"]                                                                                                                                                                                                                                                                                                            |
| ["humangutMH0055_GL0072634 [gene] locus=scaffold22578_5:4211:5374:+ [Complete] codon-table.11",<br>"humangutV1_CD38-0_GL0055924 [gene] locus=scaffold36707_2:1441:2604:+ [Complete] codon-table.11",<br>"mouse1A-dyr2-07_GL0065353 [gene] locus=scaffold6960_10:14888:16051:+ [Complete] codon-table.11"]                                                                                                                                                                                                                                                                                                                        |
| ["humangutMH0057_GL0037539 [gene] locus=scaffold4165_5:7455:8618:- [Complete] codon-table.11"]                                                                                                                                                                                                                                                                                                                                                                                                                                                                                                                                   |
| ["humangutMH0066_GL0031540 [gene] locus=scaffold2763_4:6077:7243:- [Complete] codon-table.11"]                                                                                                                                                                                                                                                                                                                                                                                                                                                                                                                                   |
| ["humangutMH0085_GL0023163 [gene] locus=scaffold15198_1:3547:4698:- [Complete] codon-table.11",<br>"humangutMH0133_GL0079918 [gene] locus=scaffold48549_1:1259:2410:+ [Complete] codon-table.11",<br>"humangutO2_UC53-2_GL0046015 [gene] locus=scaffold62013_3:7862:9013:- [Complete] codon-table.11",<br>"humangutNOM004_GL0051874 [gene] locus=scaffold21992_1:23808:24959:- [Complete] codon-table.11"]                                                                                                                                                                                                                       |
| ["humangutMH0089_GL0109551 [gene] locus=scaffold8881_27:3839:4942:+ [Complete] codon-table.11"]                                                                                                                                                                                                                                                                                                                                                                                                                                                                                                                                  |
| ["humangutMH0100_GL0065892 [gene] locus=scaffold22486_16:18542:19729:- [Complete] codon-table.11"]                                                                                                                                                                                                                                                                                                                                                                                                                                                                                                                               |
| ["humangutMH0108_GL0094577 [gene] locus=scaffold5563_7:1181:1786:+ [Lack 3'-end] codon-table.11"]                                                                                                                                                                                                                                                                                                                                                                                                                                                                                                                                |
| ["humangutMH0116_GL0066798 [gene] locus=scaffold71313_3:2:940:+ [Lack 5'-end] codon-table.11"]                                                                                                                                                                                                                                                                                                                                                                                                                                                                                                                                   |
| ["humangutMH0122_GL0034515 [gene] locus=scaffold25847_3:899:2041:- [Lack 5'-end] codon-table.11"]                                                                                                                                                                                                                                                                                                                                                                                                                                                                                                                                |
| ["humangutMH0124_GL0021158 [gene] locus=scaffold22583_4:163:1356:- [Complete] codon-table.11"]                                                                                                                                                                                                                                                                                                                                                                                                                                                                                                                                   |
| ["humangutMH0129_GL0061913 [gene] locus=scaffold101300_2:4336:5454:+ [Complete] codon-table.11"]                                                                                                                                                                                                                                                                                                                                                                                                                                                                                                                                 |
| ["humangutMH0137_GL0025089 [gene] locus=scaffold63161_1:9120:10346:- [Complete] codon-table.11"]                                                                                                                                                                                                                                                                                                                                                                                                                                                                                                                                 |

|                                                                                                                                                                                                                                                                                  |
|----------------------------------------------------------------------------------------------------------------------------------------------------------------------------------------------------------------------------------------------------------------------------------|
| ["humangutMH0138_GL0020687 [gene] locus=scaffold22140_2:154:1365:- [Complete] codon-table.11"]                                                                                                                                                                                   |
| ["humangutMH0141_GL0130465 [gene] locus=scaffold18875_3:6192:7382:- [Complete] codon-table.11"]                                                                                                                                                                                  |
| ["humangutMH0181_GL0022584 [gene] locus=scaffold28989_5:64:1260:- [Complete] codon-table.11",<br>"humangutMH0187_GL0080429 [gene] locus=scaffold51749_1:37297:38493:+ [Complete] codon-table.11"]                                                                                |
| ["humangutMH0183_GL0083894 [gene] locus=scaffold87893_8:3:641:+ [Lack 5'-end] codon-table.11"]                                                                                                                                                                                   |
| ["humangutMH0189_GL0113658 [gene] locus=scaffold35684_13:1031:3979:- [Complete] codon-table.11"]                                                                                                                                                                                 |
| ["humangutMH0192_GL0171168 [gene] locus=scaffold42030_18:369:1508:- [Complete] codon-table.11"]                                                                                                                                                                                  |
| ["humangutMH0193_GL0078195 [gene] locus=scaffold62144_9:944:2182:+ [Complete] codon-table.11"]                                                                                                                                                                                   |
| ["humangutMH0195_GL0159559 [gene] locus=scaffold45515_2:3475:4584:+ [Complete] codon-table.11"]                                                                                                                                                                                  |
| ["humangutMH0199_GL0008694 [gene] locus=scaffold57343_1:3851:5047:- [Lack 5'-end] codon-table.11"]                                                                                                                                                                               |
| ["humangutMH0200_GL0056196 [gene] locus=scaffold130159_1:44904:46067:- [Complete] codon-table.11"]                                                                                                                                                                               |
| ["humangutMH0212_GL0048360 [gene] locus=scaffold50771_2:909:2063:+ [Complete] codon-table.11",<br>"pigPIG-001_GL0156765 [gene] locus=scaffold92880_2:1027:2181:- [Complete] codon-table.11"]                                                                                     |
| ["humangutMH0222_GL0038110 [gene] locus=scaffold77473_4:6064:8496:- [Complete] codon-table.11"]                                                                                                                                                                                  |
| ["humangutMH0230_GL0077374 [gene] locus=scaffold71928_1:115768:116970:+ [Complete] codon-table.11"]                                                                                                                                                                              |
| ["humangutMH0244_GL0155053 [gene] locus=scaffold213_13:658:1947:- [Complete] codon-table.11"]                                                                                                                                                                                    |
| ["humangutMH0274_GL0010583 [gene] locus=scaffold93764_3:14026:15246:+ [Complete] codon-table.11"]                                                                                                                                                                                |
| ["humangutMH0274_GL0122424 [gene] locus=scaffold93988_1:21895:23082:- [Complete] codon-table.11"]                                                                                                                                                                                |
| ["humangutMH0286_GL0091580 [gene] locus=scaffold121555_1:2:1639:+ [Lack both ends] codon-table.11"]                                                                                                                                                                              |
| ["humangutMH0289_GL0164495 [gene] locus=scaffold77783_10:7690:8826:+ [Complete] codon-table.11"]                                                                                                                                                                                 |
| ["humangutMH0335_GL0084956 [gene] locus=scaffold33310_4:52257:53381:- [Complete] codon-table.11",<br>"mouse1A-dyr2-07_GL0030947 [gene] locus=scaffold11171_4:5417:6541:- [Complete] codon-table.11"]                                                                             |
| ["humangutMH0350_GL0202447 [gene] locus=scaffold6299_14:546:1442:+ [Lack 3'-end] codon-table.11"]                                                                                                                                                                                |
| ["humangutMH0357_GL0171132 [gene] locus=scaffold108150_2:49:921:+ [Lack 3'-end] codon-table.11"]                                                                                                                                                                                 |
| ["humangutMH0361_GL0098667 [gene] locus=scaffold49262_1:2500:4911:- [Complete] codon-table.11"]                                                                                                                                                                                  |
| ["humangutMH0369_GL0008313 [gene] locus=scaffold38633_1:62820:63929:- [Complete] codon-table.11"]                                                                                                                                                                                |
| ["humangutMH0378_GL0024253 [gene] locus=scaffold18755_3:2:1192:+ [Lack 5'-end] codon-table.11"]                                                                                                                                                                                  |
| ["humangutMH0378_GL0079806 [gene] locus=scaffold23929_19:1:1302:+ [Lack both ends] codon-table.11"]                                                                                                                                                                              |
| ["humangutMH0383_GL0069535 [gene] locus=scaffold82472_2:329:1519:- [Complete] codon-table.11"]                                                                                                                                                                                   |
| ["humangutMH0388_GL0138141 [gene] locus=scaffold79628_1:5851:6978:- [Complete] codon-table.11"]                                                                                                                                                                                  |
| ["humangutMH0413_GL0067508 [gene] locus=scaffold44909_1:10839:11966:- [Complete] codon-table.11"]                                                                                                                                                                                |
| ["humangutMH0415_GL0094360 [gene] locus=scaffold341_3:67886:68998:+ [Complete] codon-table.11"]                                                                                                                                                                                  |
| ["humangutMH0429_GL0034540 [gene] locus=scaffold85161_1:3046:5451:- [Complete] codon-table.11",<br>"humangut158499257-stool2_revised_C1325755_1_gene187214 strand:- start:96 stop:2501 length:2406 start_codon:yes stop_codon:yes gene_type:complete [Complete] codon-table.11"] |
| ["humangutMH0439_GL0123154 [gene] locus=scaffold4255_11:2:430:- [Lack 3'-end] codon-table.11"]                                                                                                                                                                                   |
| ["humangutMH0453_GL0139557 [gene] locus=scaffold50617_1:1:1836:+ [Lack 5'-end] codon-table.11"]                                                                                                                                                                                  |
| ["humangutN024A_GL0026144 [gene] locus=scaffold20549_2:2:1033:+ [Lack 5'-end] codon-table.11"]                                                                                                                                                                                   |
| ["humangutN035A_GL0060277 [gene] locus=scaffold1299_6:51752:52900:+ [Complete] codon-table.11"]                                                                                                                                                                                  |
| ["humangutN038A_GL0085108 [gene] locus=scaffold17346_5:203:1378:- [Lack 5'-end] codon-table.11"]                                                                                                                                                                                 |
| ["humangutNOM023_GL0008696 [gene] locus=scaffold6280_11:14774:15997:+ [Complete] codon-table.11"]                                                                                                                                                                                |
| ["humangutO2_CD2-0_GL0013688 [gene] locus=scaffold15209_1:3407:4612:+ [Complete] codon-table.11",<br>"pigPIG-008_GL0060387 [gene] locus=scaffold142563_2:2247:3452:- [Complete] codon-table.11"]                                                                                 |

|                                                                                                                                                                                                                                                                                             |
|---------------------------------------------------------------------------------------------------------------------------------------------------------------------------------------------------------------------------------------------------------------------------------------------|
| ["humangutO2.UC11-2_GL0042558 [gene] locus=scaffold39495_3:1637:2773:- [Complete] codon-table.11"]                                                                                                                                                                                          |
| ["humangutO2.UC2-2_GL0005274 [gene] locus=scaffold20781_1:7374:8471:+ [Complete] codon-table.11"]                                                                                                                                                                                           |
| ["humangutO2.UC21-2_GL0054119 [gene] locus=scaffold50675_22:3:1172:+ [Lack 5'-end] codon-table.11"]                                                                                                                                                                                         |
| ["humangutO2.UC44-0_GL0005851 [gene] locus=scaffold50768_10:3:995:+ [Lack both ends] codon-table.11"]                                                                                                                                                                                       |
| ["humangutO2.UC48-0_GL0055178 [gene] locus=scaffold132969_1:1085:2236:- [Complete] codon-table.11"]                                                                                                                                                                                         |
| ["humangutT2D-11A_GL0139780 [gene] locus=scaffold31288_2:2:850:+ [Lack both ends] codon-table.11"]                                                                                                                                                                                          |
| ["humangutT2D-135A_GL0017292 [gene] locus=scaffold7557_5:5284:6399:- [Complete] codon-table.11"]                                                                                                                                                                                            |
| ["humangutT2D-48A_GL0072608 [gene] locus=scaffold33749_3:10367:11497:+ [Complete] codon-table.11",<br>"humangut764487809-stool1_revised_scaffold44332_1_gene14323 strand:- start:1 stop:1128 length:1128 start_codon:yes stop_codon:no gene_type:incomplete [Lack 3'-end] codon-table.11"]  |
| ["humangutT2D-70A_GL0056825 [gene] locus=scaffold1160_4:29:862:+ [Lack 3'-end] codon-table.11"]                                                                                                                                                                                             |
| ["humangutT2D-8A_GL0016983 [gene] locus=scaffold1359_13:1:669:+ [Lack 5'-end] codon-table.11"]                                                                                                                                                                                              |
| ["humangutV1.CD3-3-PN_GL0023210 [gene] locus=scaffold39892_3:6392:7543:- [Complete] codon-table.11",<br>"humangut160765029-stool1_revised_scaffold21574_1_gene29821 strand:+ start:4252 stop:5403 length:1152 start_codon:yes stop_codon:yes gene_type:complete [Complete] codon-table.11"] |
| ["humangutV1.FI28_GL0230259 [gene] locus=scaffold100310_8:2:622:- [Lack both ends] codon-table.11"]                                                                                                                                                                                         |
| ["humangutV1.FI34_GL0128785 [gene] locus=scaffold59159_3:821:1816:+ [Lack 3'-end] codon-table.11"]                                                                                                                                                                                          |
| ["humangutV1.UC17-0_GL0023683 [gene] locus=scaffold14974_3:776:1324:- [Lack 5'-end] codon-table.11"]                                                                                                                                                                                        |
| ["humangutV1.UC4-5_GL0061566 [gene] locus=scaffold1889_5:1:804:- [Lack 3'-end] codon-table.11"]                                                                                                                                                                                             |
| ["mouse16_GL0106917 [gene] locus=scaffold69501_2:23081:24208:+ [Complete] codon-table.11"]                                                                                                                                                                                                  |
| ["mouse4-1_GL0056131 [gene] locus=scaffold43684_1:221390:224281:- [Complete] codon-table.11"]                                                                                                                                                                                               |
| ["mouseG1-1A_GL0001040 [gene] locus=scaffold120_1:57678:58793:+ [Complete] codon-table.11"]                                                                                                                                                                                                 |
| ["mouseG1-4A_GL0012400 [gene] locus=scaffold7238_4:2:511:- [Lack 3'-end] codon-table.11"]                                                                                                                                                                                                   |
| ["mouseG1-4A_GL0065519 [gene] locus=scaffold51446_1:353:1492:+ [Lack 3'-end] codon-table.11"]                                                                                                                                                                                               |
| ["mouseG1-5A_GL0031042 [gene] locus=scaffold16192_1:2:661:- [Lack both ends] codon-table.11"]                                                                                                                                                                                               |
| ["mouseG1-6A_GL0011841 [gene] locus=scaffold3133_3:478:1080:- [Lack 5'-end] codon-table.11"]                                                                                                                                                                                                |
| ["mouseG1-6A_GL0079350 [gene] locus=scaffold45043_4:3:986:+ [Lack 5'-end] codon-table.11"]                                                                                                                                                                                                  |
| ["mouseMC-6-2_GL0142574 [gene] locus=scaffold115293_1:165:749:- [Lack 5'-end] codon-table.11"]                                                                                                                                                                                              |
| ["mouseMC-6-2_GL0142575 [gene] locus=scaffold115293_2:3:710:- [Lack both ends] codon-table.11"]                                                                                                                                                                                             |
| ["mouseMC-6-3_GL0103379 [gene] locus=scaffold77658_4:2:715:+ [Lack both ends] codon-table.11"]                                                                                                                                                                                              |
| ["mouseMC-6-4_GL0037048 [gene] locus=scaffold21497_5:1:603:+ [Lack both ends] codon-table.11"]                                                                                                                                                                                              |
| ["mouseS-Fe10_GL0025736 [gene] locus=scaffold51837_1:4789:7089:- [Complete] codon-table.11"]                                                                                                                                                                                                |
| ["mouseS-Fe10_GL0041139 [gene] locus=scaffold2483_2:5386:6516:- [Complete] codon-table.11",<br>"mouse2B-dyr19-06_GL0008379 [gene] locus=scaffold740_10:695:1825:- [Complete] codon-table.11"]                                                                                               |
| ["mouseS-Fe10_GL0055926 [gene] locus=scaffold57598_1:20125:22446:+ [Complete] codon-table.11"]                                                                                                                                                                                              |
| ["mouseS-Fe10_GL0084620 [gene] locus=scaffold64647_1:40469:41668:- [Complete] codon-table.11"]                                                                                                                                                                                              |
| ["mouseS-Fe10_GL0130324 [gene] locus=scaffold327_6:31001:32179:+ [Complete] codon-table.11"]                                                                                                                                                                                                |
| ["pigBHZ-6B_GL0151827 [gene] locus=scaffold990_3:6800:7978:+ [Complete] codon-table.11"]                                                                                                                                                                                                    |
| ["pigBMZ-17B_GL0054550 [gene] locus=scaffold62536_5:686:1801:- [Complete] codon-table.11"]                                                                                                                                                                                                  |
| ["pigDB-537B_GL0095012 [gene] locus=scaffold88829_8:51:1169:+ [Complete] codon-table.11"]                                                                                                                                                                                                   |
| ["pigDB-537B_GL0107503 [gene] locus=scaffold3109_3:2351:4654:- [Complete] codon-table.11"]                                                                                                                                                                                                  |
| ["pigEYZ-353B_GL0228570 [gene] locus=scaffold148936_1:86:1069:+ [Complete] codon-table.11"]                                                                                                                                                                                                 |
| ["pigPIG-009_GL0034422 [gene] locus=scaffold22982_2:2803:3897:- [Lack 5'-end] codon-table.11"]                                                                                                                                                                                              |

|                                                                                                                                                                                              |
|----------------------------------------------------------------------------------------------------------------------------------------------------------------------------------------------|
| ["pigPIG-011_GL0063271 [gene] locus=C2002064_1:3:1784:+ [Lack 5'-end] codon-table.11"]                                                                                                       |
| ["pigPIG-011_GL0206789 [gene] locus=scaffold153707_5:1:819:+ [Lack both ends] codon-table.11"]                                                                                               |
| ["pigPIG-015_GL0018584 [gene] locus=scaffold77075_1:922:2070:- [Complete] codon-table.11"]                                                                                                   |
| ["pigPIG-018_GL0009170 [gene] locus=scaffold115433_2:3:839:- [Lack 3'-end] codon-table.11"]                                                                                                  |
| ["pigPIG-023_GL0161560 [gene] locus=scaffold132720_2:2:505:+ [Lack both ends] codon-table.11"]                                                                                               |
| ["pigPIG-027_GL0043017 [gene] locus=scaffold20702_3:7880:9016:- [Complete] codon-table.11"]                                                                                                  |
| ["pigPIG-027_GL0090201 [gene] locus=scaffold104690_6:488:2791:- [Complete] codon-table.11"]                                                                                                  |
| ["pigPIG-028_GL0025267 [gene] locus=scaffold8938_2:2394:3551:+ [Complete] codon-table.11"]                                                                                                   |
| ["pigPIG-029_GL0094936 [gene] locus=scaffold11947_2:2:1144:+ [Lack both ends] codon-table.11"]                                                                                               |
| ["pigPIG-036_GL0031679 [gene] locus=scaffold21832_2:2:523:+ [Lack both ends] codon-table.11"]                                                                                                |
| ["pigPIG-052_GL0008222 [gene] locus=scaffold121254_1:4272:6683:- [Complete] codon-table.11",<br>"rumen553_GL0779074_1 [gene] locus=C7766909_1:34895:37306:+[Complete]"]                      |
| ["pigPIG-052_GL0134708 [gene] locus=scaffold187325_3:7603:8691:- [Complete] codon-table.11"]                                                                                                 |
| ["pigPIG-052_GL0231560 [gene] locus=scaffold161331_1:11503:12633:+ [Complete] codon-table.11",<br>"rumen553_GL0186123_1 [gene] locus=scaffold29911_3:29968:31098:-[Complete]"]               |
| ["pigPIG-093_GL0025039 [gene] locus=C1915055_1:2:955:- [Lack 3'-end] codon-table.11"]                                                                                                        |
| ["pigPIG-095_GL0118967 [gene] locus=scaffold95652_2:964:1785:+ [Complete] codon-table.11"]                                                                                                   |
| ["pigPIG_114_GL0056339 [gene] locus=scaffold36302_2:2:1201:+ [Lack 5'-end] codon-table.11"]                                                                                                  |
| ["pigPIG_124_GL0137253 [gene] locus=scaffold112837_1:4633:7080:- [Complete] codon-table.11",<br>"pigPIG-026_GL0232589 [gene] locus=scaffold177914_1:7954:10401:- [Complete] codon-table.11"] |
| ["pigPIG_130_GL0244308 [gene] locus=scaffold154735_2:2:991:+ [Lack both ends] codon-table.11"]                                                                                               |
| ["pigPIG_151_GL0226406 [gene] locus=scaffold190994_1:3:575:- [Lack both ends] codon-table.11"]                                                                                               |
| ["pigPIG_151_GL0245739 [gene] locus=scaffold213322_1:3:1328:+ [Lack 5'-end] codon-table.11"]                                                                                                 |
| ["pigPIG_171_GL0207592 [gene] locus=scaffold230377_1:1075:2079:+ [Lack 3'-end] codon-table.11"]                                                                                              |
| ["pigPIG_175_GL0210073 [gene] locus=scaffold153980_1:3:914:- [Lack both ends] codon-table.11"]                                                                                               |
| ["pigPIG_189_GL0023829 [gene] locus=scaffold145928_3:2:2152:+ [Lack 5'-end] codon-table.11"]                                                                                                 |
| ["pigPIG_190_GL0064267 [gene] locus=scaffold19076_2:2:937:- [Lack both ends] codon-table.11"]                                                                                                |
| ["pigPIG_200_GL0045959 [gene] locus=scaffold157948_2:317:946:+ [Lack 3'-end] codon-table.11"]                                                                                                |
| ["pigPIG_200_GL0174839 [gene] locus=scaffold50705_2:686:3208:+ [Complete] codon-table.11"]                                                                                                   |
| ["pigSYZ-635B_GL0188356 [gene] locus=scaffold774_1:2:2317:- [Lack both ends] codon-table.11"]                                                                                                |
| ["pigSYZ-639B_GL0079434 [gene] locus=scaffold83973_1:3:1706:+ [Lack both ends] codon-table.11"]                                                                                              |
| ["rumen0081_GL0018308_1 [gene] locus=scaffold1707031_1:53:595:-[Lack 5'-end]"]                                                                                                               |
| ["rumen0081_GL0217456_1 [gene] locus=scaffold936411_1:1:4941:+[Lack 5'-end]"]                                                                                                                |
| ["rumen0081_GL0564217_1 [gene] locus=C37935053_1:1:525:+[Lack both ends]"]                                                                                                                   |
| ["rumen0081_GL0861149_1 [gene] locus=scaffold569877_2:2:952:+[Lack 5'-end]"]                                                                                                                 |
| ["rumen0081_GL1500808_1 [gene] locus=scaffold1219931_6:2:511:-[Lack both ends]"]                                                                                                             |
| ["rumen0081_GL1521727_1 [gene] locus=scaffold3083_1:2949:8456:-[Complete]"]                                                                                                                  |
| ["rumen0081_GL1843532_1 [gene] locus=scaffold1472887_1:1:519:+[Lack both ends]"]                                                                                                             |
| ["rumen0081_GL1934982_1 [gene] locus=scaffold1748454_1:2048:3247:-[Complete]"]                                                                                                               |
| ["rumen0081_GL2263554_1 [gene] locus=scaffold1701902_1:230:685:+[Lack 3'-end]"]                                                                                                              |
| ["rumen100058_GL0113072_1 [gene] locus=scaffold598027_1:280:2838:+[Complete]"]                                                                                                               |
| ["rumen100058_GL0403439_1 [gene] locus=scaffold1138840_4:2:1195:+[Lack 5'-end]"]                                                                                                             |
| ["rumen100058_GL1917898_1 [gene] locus=scaffold3212573_1:1:975:-[Lack 3'-end]"]                                                                                                              |

|                                                                                                                                                                                                                                              |
|----------------------------------------------------------------------------------------------------------------------------------------------------------------------------------------------------------------------------------------------|
| ["rumen100058_GL2225638_1 [gene] locus=scaffold56557_5:3:1163:-[Lack 3'-end]"]                                                                                                                                                               |
| ["rumen100058_GL3095310_1 [gene] locus=scaffold746023_6:763:1911:-[Complete]"]                                                                                                                                                               |
| ["rumen100058_GL3404804_1 [gene] locus=C59223072_1:174:731:+[Lack 3'-end]"]                                                                                                                                                                  |
| ["rumen100058_GL3648478_1 [gene] locus=scaffold2081806_1:2023:3039:-[Lack 5'-end]"]                                                                                                                                                          |
| ["rumen2009040_GL0335525_1 [gene] locus=scaffold597333_2:2:670:+[Lack 5'-end]"]                                                                                                                                                              |
| ["rumen2009040_GL0849204_1 [gene] locus=scaffold658670_2:11796:12725:-[Complete]"]                                                                                                                                                           |
| ["rumen2009040_GL1278742_1 [gene] locus=scaffold908923_1:299636:302218:-[Complete]"]                                                                                                                                                         |
| ["rumen2009040_GL1638798_1 [gene] locus=scaffold982511_1:1:951:+[Lack 5'-end]"]                                                                                                                                                              |
| ["rumen2009040_GL2024614_1 [gene] locus=scaffold725108_1:3:1022:-[Lack both ends]"]                                                                                                                                                          |
| ["rumen2009040_GL2470304_1 [gene] locus=scaffold747333_1:148:1287:+[Complete]"]                                                                                                                                                              |
| ["rumen2009040_GL2513307_1 [gene] locus=scaffold411342_2:1:516:+[Lack both ends]"]                                                                                                                                                           |
| ["rumen2009040_GL2838540_1 [gene] locus=scaffold516193_3:10389:11534:-[Complete]"]                                                                                                                                                           |
| ["rumen2009040_GL3390821_1 [gene] locus=scaffold1683667_3:53:2179:+[Complete]"]                                                                                                                                                              |
| ["rumen3042_GL0122552_1 [gene] locus=scaffold860228_2:3:536:-[Lack 3'-end]"]                                                                                                                                                                 |
| ["rumen3042_GL0231557_1 [gene] locus=scaffold1469926_2:2:2455:+[Lack both ends]"]                                                                                                                                                            |
| ["rumen3042_GL0286054_1 [gene] locus=scaffold1634175_1:212:895:+[Lack 3'-end]"]                                                                                                                                                              |
| ["rumen3042_GL0456759_1 [gene] locus=scaffold928852_1:3:767:-[Lack 3'-end]"]                                                                                                                                                                 |
| ["rumen3042_GL1567465_1 [gene] locus=scaffold1448515_1:3:749:-[Lack 3'-end]"]                                                                                                                                                                |
| ["rumen3042_GL1900522_1 [gene] locus=scaffold1539956_2:693:1928:-[Complete]"]                                                                                                                                                                |
| ["rumen3042_GL2068048_1 [gene] locus=scaffold533713_2:3:761:+[Lack 5'-end]"]                                                                                                                                                                 |
| ["rumen3042_GL2223721_1 [gene] locus=C51529607_1:23:829:-[Lack 5'-end]"]                                                                                                                                                                     |
| ["rumen3042_GL2588302_1 [gene] locus=C50500639_1:1:429:+[Lack 5'-end]"]                                                                                                                                                                      |
| ["rumen3042_GL2659811_1 [gene] locus=scaffold2554224_1:856:1551:+[Lack 3'-end]"]                                                                                                                                                             |
| ["rumen552_GL0166750_1 [gene] locus=scaffold736128_1:3:530:+[Lack both ends]"]                                                                                                                                                               |
| ["rumen552_GL0214002_1 [gene] locus=scaffold964823_2:54851:57121:-[Complete]"]                                                                                                                                                               |
| ["rumen552_GL0801114_1 [gene] locus=scaffold467322_1:41055:42179:-[Complete]",<br>"rumen0081_GL0126292_1 [gene] locus=scaffold332114_3:660:1784:+[Complete]"]                                                                                |
| ["rumen552_GL1023644_1 [gene] locus=scaffold7740_3:86586:87689:-[Complete]",<br>"rumen583_GL0741327_1 [gene] locus=scaffold342004_1:40774:41877:+[Complete]",<br>"rumen0081_GL1181816_1 [gene] locus=scaffold234247_3:228:1331:-[Complete]"] |
| ["rumen552_GL1536499_1 [gene] locus=scaffold658342_1:39774:40904:-[Complete]"]                                                                                                                                                               |
| ["rumen553_GL0294380_1 [gene] locus=C7764951_1:19517:20605:+[Complete]"]                                                                                                                                                                     |
| ["rumen553_GL0415727_1 [gene] locus=scaffold311384_2:6050:8380:-[Complete]"]                                                                                                                                                                 |
| ["rumen553_GL0481082_1 [gene] locus=scaffold3744_2:4315:5445:-[Complete]"]                                                                                                                                                                   |
| ["rumen553_GL0653290_1 [gene] locus=scaffold30284_4:16535:18841:-[Complete]",<br>"rumen555_GL1877630_1 [gene] locus=scaffold268090_4:694:3000:-[Complete]",<br>"rumen555_GL1881090_1 [gene] locus=scaffold946831_5:1062:3368:-[Complete]"]   |
| ["rumen554_GL0424050_1 [gene] locus=C41249349_1:1:498:+[Lack 5'-end]"]                                                                                                                                                                       |
| ["rumen554_GL0722787_1 [gene] locus=C41478849_1:6:1172:-[Complete]"]                                                                                                                                                                         |
| ["rumen554_GL0798826_1 [gene] locus=scaffold1703033_1:2:571:-[Lack 3'-end]"]                                                                                                                                                                 |
| ["rumen554_GL2279888_1 [gene] locus=scaffold2137980_1:3:1889:+[Lack both ends]"]                                                                                                                                                             |
| ["rumen554_GL2576864_1 [gene] locus=scaffold1347888_4:3:1568:-[Lack 3'-end]"]                                                                                                                                                                |
| ["rumen555_GL0476822_1 [gene] locus=scaffold437598_2:1:4062:+[Lack 5'-end]"]                                                                                                                                                                 |



|                                                                                   |
|-----------------------------------------------------------------------------------|
| ["rumen555_GL0484805_1 [gene] locus=scaffold1581487_1:3:1310:+[Lack 5'-end]"]     |
| ["rumen555_GL0645598_1 [gene] locus=scaffold1265563_1:387:788:-[Lack 5'-end]"]    |
| ["rumen555_GL1084251_1 [gene] locus=scaffold1543929_1:2:517:-[Lack 3'-end]"]      |
| ["rumen555_GL1314332_1 [gene] locus=C27734054_1:3:629:+[Lack both ends]"]         |
| ["rumen555_GL1846163_1 [gene] locus=scaffold344520_4:1542:2699:+[Complete]"]      |
| ["rumen555_GL2441297_1 [gene] locus=scaffold1119893_1:2:553:-[Lack both ends]"]   |
| ["rumen555_GL2469032_1 [gene] locus=scaffold402776_1:2770:3411:+[Lack 3'-end]"]   |
| ["rumen555_GL2500413_1 [gene] locus=scaffold590573_1:2:1252:-[Lack both ends]"]   |
| ["rumen555_GL2504734_1 [gene] locus=scaffold293509_1:3:791:+[Lack both ends]"]    |
| ["rumen583_GL0534788_1 [gene] locus=scaffold12672_1:764:2794:-[Complete]"]        |
| ["rumen7049_GL0859720_1 [gene] locus=scaffold1646031_3:57:1661:-[Complete]"]      |
| ["rumen7049_GL0939381_1 [gene] locus=scaffold1728221_2:2:1777:+[Lack both ends]"] |
| ["rumen7049_GL1012174_1 [gene] locus=scaffold1938312_2:407:2641:-[Complete]"]     |
| ["rumen7049_GL1068002_1 [gene] locus=scaffold1369585_1:1:2196:+[Lack both ends]"] |
| ["rumen7049_GL1176168_1 [gene] locus=scaffold897496_1:2768:5314:-[Complete]"]     |
| ["rumen7049_GL1225084_1 [gene] locus=scaffold2075975_1:218:1384:+[Complete]"]     |
| ["rumen7049_GL1834282_1 [gene] locus=scaffold2118351_1:1:552:-[Lack both ends]"]  |
| ["rumen7049_GL2133015_1 [gene] locus=scaffold1426321_1:102:1232:-[Complete]"]     |
| ["rumen7049_GL2224832_1 [gene] locus=C52640272_1:1:852:+[Lack 5'-end]"]           |
| ["rumen7049_GL2592886_1 [gene] locus=scaffold389306_1:1:1149:+[Lack 5'-end]"]     |
| ["rumen7049_GL2741019_1 [gene] locus=scaffold1423006_3:2245:3204:-[Complete]"]    |

## C4

|                                                                                                                                                                                                                                                                                                                                                                                                                                                                                                                                                                                                                                                                                                                                                                                                                                        |
|----------------------------------------------------------------------------------------------------------------------------------------------------------------------------------------------------------------------------------------------------------------------------------------------------------------------------------------------------------------------------------------------------------------------------------------------------------------------------------------------------------------------------------------------------------------------------------------------------------------------------------------------------------------------------------------------------------------------------------------------------------------------------------------------------------------------------------------|
| ["Ncazy AOC93207.1 Beta-1", "4-mannooligosaccharide phosphorylase [Flavobacterium anhuiense]",<br>"Ncazy AOE51475.1 glycosidase [Flavobacterium psychrophilum]",<br>"cazy AWK05320.1 glycosidase [Flavobacterium sp. HYN0056]",<br>"cazy 947264313 gb ALM47851.1 glycosidase [Flavobacterium psychrophilum]",<br>"cazy 255346869 gb ACU06195.1 glycosidase PH1107-related [Pedobacter heparinus DSM 2366]"]                                                                                                                                                                                                                                                                                                                                                                                                                            |
| ["Ncazy AOE51603.1 glycosidase [Flavobacterium psychrophilum]",<br>"cazy AWH86432.1 glycosidase [Flavobacterium sp. HYN0059]",<br>"cazy 947264444 gb ALM47982.1 glycosidase [Flavobacterium psychrophilum]"]                                                                                                                                                                                                                                                                                                                                                                                                                                                                                                                                                                                                                           |
| ["cazy CCgi 16413308 emb CAC96089.1 β-1", "2-mannobiose phosphorylase_lin0857 [Listeria innocua Clp11262]",<br>"cazy APH75866.1 Putative glycosylase [Listeria monocytogenes]",<br>"cazy APH78842.1 Putative glycosylase [Listeria monocytogenes]",<br>"cazy APO61046.1 glycosidase [Listeria monocytogenes]",<br>"cazy APQ09030.1 glycosidase [Listeria monocytogenes]",<br>"cazy APV02038.1 glycosidase [Listeria monocytogenes]",<br>"cazy APV05006.1 glycosidase [Listeria monocytogenes]",<br>"cazy APV08055.1 glycosidase [Listeria monocytogenes]",<br>"cazy APV11155.1 glycosidase [Listeria monocytogenes]",<br>"cazy AQY50881.1 glycosidase [Listeria welhenstephanensis]",<br>"cazy AUB53497.1 glycosidase [Enterococcus mundtii]",<br>"cazy SNV21540.1 Domain of uncharacterised function (DUF377) [Listeria welshimeri]"] |

"cazy|SNV39278.1 Domain of uncharacterised function (DUF377) [Listeria ivanovii subsp. ivanovii]",

"cazy|SNV87103.1 Domain of uncharacterised function (DUF377) [Listeria ivanovii subsp. ivanovii]",

"cazygi|346981339|emb|CBW85288.1| Hypothetical protein of unknown function [Listeria ivanovii subsp. ivanovii PAM 55]",

"cazygi|694158253|gb|AIS64822.1| glycosidase [Listeria ivanovii subsp. ivanovii]",

"cazygi|694155550|gb|AIS62120.1| glycosidase [Listeria ivanovii subsp. londoniensis]",

"cazygi|694152715|gb|AIS59286.1| glycosidase [Listeria ivanovii subsp. londoniensis]",

"cazygi|583837501|gb|AHI55363.1| glycosidase [Listeria ivanovii WSLC3009]",

"cazygi|384390376|gb|AFH79446.1| hypothetical protein MUO\_04580 [Listeria monocytogenes 07PF0776]",

"cazygi|284056755|gb|ADB67696.1| hypothetical protein LM5578\_0943 [Listeria monocytogenes 08-5578]",

"cazygi|284059802|gb|ADB70741.1| hypothetical protein LM5923\_0897 [Listeria monocytogenes 08-5923]",

"cazygi|345536422|gb|AEO05862.1| hypothetical protein LMRG\_02287 [Listeria monocytogenes 10403S]",

"cazygi|987005979|gb|AMD51570.1| glycosidase [Listeria monocytogenes]",

"cazygi|1009069741|gb|AMR53417.1| glycosidase [Listeria monocytogenes]",

"cazygi|584270596|emb|CDM19439.1| conserved protein of unknown function [Listeria monocytogenes 6179]",

"cazygi|957750430|gb|ALQ20171.1| glycosidase [Listeria monocytogenes]",

"cazygi|957746227|gb|ALQ15969.1| glycosidase [Listeria monocytogenes]",

"cazygi|404218417|emb|CBY69781.1| glycosylase", " putative [Listeria monocytogenes ATCC 19117]",

"cazygi|957744515|gb|ALQ14258.1| glycosidase [Listeria monocytogenes]",

"cazygi|523836882|gb|AGR00748.1| glycosidase [Listeria monocytogenes]",

"cazygi|630374582|gb|AHY98922.1| glycosidase [Listeria monocytogenes]",

"cazygi|820768138|gb|AKG85006.1| glycosidase [Listeria monocytogenes]",

"cazygi|820771048|gb|AKG87829.1| glycosidase [Listeria monocytogenes]",

"cazygi|985617591|gb|AMD23908.1| glycosidase [Listeria monocytogenes]",

"cazygi|985620610|gb|AMD26829.1| glycosidase [Listeria monocytogenes]",

"cazygi|873259059|gb|AKP38021.1| glycosidase [Listeria monocytogenes]",

"cazygi|543860150|emb|CDG44729.1| COG2152 predicted glycoside hydrolase [Listeria monocytogenes EGD]",

"cazygi|16410267|emb|CAC98942.1| lmo0864 [Listeria monocytogenes EGD-e]",

"cazygi|346645782|gb|AEO38407.1| conserved hypothetical protein [Listeria monocytogenes Finland 1998]",

"cazygi|346423637|gb|AEO25162.1| conserved hypothetical protein [Listeria monocytogenes FSL R2-561]",

"cazygi|1028455793|gb|ANE38727.1| glycosidase [Listeria monocytogenes]",

"cazygi|217334311|gb|ACK40105.1| conserved hypothetical protein [Listeria monocytogenes HCC23]",

"cazygi|973722941|gb|ALX68318.1| glycosidase [Listeria monocytogenes]",

"cazygi|741044297|gb|AJA82576.1| hypothetical protein LO81\_895 [Listeria monocytogenes]",

"cazygi|345533517|gb|AEO02958.1| hypothetical protein LMOG\_00867 [Listeria monocytogenes J0161]",

"cazygi|523918212|gb|AGR32608.1| glycosidase [Listeria monocytogenes J1816]",

"cazygi|523852774|gb|AGR16549.1| glycosidase [Listeria monocytogenes]",

"cazygi|328467137|gb|EGF38227.1| glycosidase [Listeria monocytogenes J1-220]",

"cazygi|523858659|gb|AGR20893.1| glycosidase [Listeria monocytogenes]",

"cazygi|523861765|gb|AGR22441.1| glycosidase [Listeria monocytogenes]",

"cazygi|523844661|gb|AGR09328.1| glycosidase [Listeria monocytogenes]",

"cazygi|523840688|gb|AGR05429.1| glycosidase [Listeria monocytogenes]",

"cazygi|523846520|gb|AGR11186.1| glycosidase [Listeria monocytogenes]",

"cazygi|827392101|gb|AKI51637.1| glycosylase", " putative [Listeria monocytogenes]",

"cazygi|827395179|gb|AKI54714.1| glycosylase",

"cazygi|827386497|gb|AKI46035.1| glycosylase",

"cazygi|827389275|gb|AKI48812.1| glycosylase",

"cazygi|827381008|gb|AKI40548.1| glycosylase",

"cazygi|827383592|gb|AKI43131.1| glycosylase",

"cazygi|406360669|emb|CBY66942.1| glycosylase", " putative [Listeria monocytogenes L312]",

"cazygi|307570398|emb|CAR83577.1| glycosylase", " putative [Listeria monocytogenes L99]",

"cazygi|441470505|emb|CCQ20260.1| 4-O-beta-D-mannosyl-D-glucose phosphorylase [Listeria monocytogenes]",

"cazygi|970873353|gb|ALU79259.1| glycosidase [Listeria monocytogenes]",

"cazygi|970870907|gb|ALU76814.1| glycosidase [Listeria monocytogenes]",

"cazygi|970878247|gb|ALU84066.1| glycosidase [Listeria monocytogenes]",

"cazygi|675332820|gb|AIL67335.1| glycosidase [Listeria monocytogenes]",

"cazygi|908215484|gb|AKS53473.1| glycosidase [Listeria monocytogenes]",

"cazygi|336022763|gb|AEH91900.1| hypothetical protein LMM7\_0895 [Listeria monocytogenes M7]",

"cazygi|523850609|gb|AGR15274.1| glycosidase [Listeria monocytogenes]",

"cazygi|767261784|gb|AJT44649.1| glycosidase [Listeria monocytogenes]",

"cazygi|597804344|gb|AHN32126.1| glycosidase [Listeria monocytogenes]",

"cazygi|730594505|gb|AIZ38159.1| hypothetical protein LMntsn\_0870 [Listeria monocytogenes]",

"cazygi|523866984|gb|AGR26266.1| glycosidase [Listeria monocytogenes]",

"cazygi|597566513|emb|CDM16105.1| conserved protein of unknown function [Listeria monocytogenes R479a]",

"cazygi|584097980|gb|AHI69537.1| hypothetical protein N881\_0896 [Listeria monocytogenes serotype 1/2a str. 01-1280]",

"cazygi|571336176|gb|AHF31620.1| hypothetical protein A430\_0935 [Listeria monocytogenes serotype 1/2a str. 08-6569]",

"cazygi|571339168|gb|AHF34611.1| hypothetical protein A431\_0935 [Listeria monocytogenes serotype 1/2a str. 08-6997]",

"cazygi|571342523|gb|AHF37602.1| hypothetical protein A435\_0935 [Listeria monocytogenes serotype 1/2a str. 10-0815]",

"cazygi|571345473|gb|AHF40551.1| hypothetical protein A437\_0893 [Listeria monocytogenes serotype 1/2a str. 10-1047]",

"cazygi|571348415|gb|AHF43492.1| hypothetical protein A422\_0893 [Listeria monocytogenes serotype 1/2a str. 88-0478]",

"cazygi|571333267|gb|AHF28713.1| hypothetical protein A407\_0933 [Listeria monocytogenes serotype 4b str. 81-0861]",

"cazygi|225875944|emb|CAS04648.1| Hypothetical protein of unknown function [Listeria monocytogenes serotype 4b str. CLIP 80459]",

"cazygi|46880362|gb|AAT03661.1| conserved hypothetical protein [Listeria monocytogenes serotype 4b str. F2365]",

"cazygi|424012926|emb|CCO63466.1| Putative uncharacterized protein [Listeria monocytogenes serotype 4b str. LL195]",

"cazygi|404245201|emb|CBY03426.1| glycosylase", " putative [Listeria monocytogenes serotype 7 str. SLCC2482]",

"cazygi|957754843|gb|ALQ24582.1| glycosidase [Listeria monocytogenes]",

"cazygi|404232807|emb|CBY54210.1| putative glycosylase [Listeria monocytogenes SLCC2372]",

"cazygi|404241464|emb|CBY62864.1| putative glycosylase [Listeria monocytogenes SLCC2376]",

"cazygi|404221282|emb|CBY72645.1| putative glycosylase [Listeria monocytogenes SLCC2378]",

"cazygi|404235742|emb|CBY57144.1| putative glycosylase [Listeria monocytogenes SLCC2479]",

"cazygi|404224140|emb|CBY75502.1| putative glycosylase [Listeria monocytogenes SLCC2540]",

"cazygi|404227049|emb|CBY48454.1| putative glycosylase [Listeria monocytogenes SLCC2755]",

"cazygi|404229928|emb|CBY51332.1| putative glycosylase [Listeria monocytogenes SLCC5850]",

"cazygi|404238646|emb|CBY60047.1| putative glycosylase [Listeria monocytogenes SLCC7179]",

"cazygi|584468276|gb|AHJ05359.1| glycosidase [Listeria monocytogenes WSLC1001]",

"cazygi|585113906|gb|AHJ34943.1| glycosidase [Listeria monocytogenes WSLC1042]",

"cazygi|289170376|emb|CBH26916.1| glycosidase family protein [Listeria seeligeri serovar 1/2b str. SLCC3954]",

"cazygi|116741155|emb|CAK20275.1| conserved hypothetical protein [Listeria welshimeri serovar 6b str. SLCC5334]"

["cazygi|100537271|gb|AMP98486.1| Glycosidase [Pedobacter cryoconitis]"]

|                                                                                                                                                                                                                                                                                                                                                                                                                                                                                                                                                                                                                                        |
|----------------------------------------------------------------------------------------------------------------------------------------------------------------------------------------------------------------------------------------------------------------------------------------------------------------------------------------------------------------------------------------------------------------------------------------------------------------------------------------------------------------------------------------------------------------------------------------------------------------------------------------|
| <p>["cazygi 1024276011 gb ANB58156.1  hypothetical protein GFC28_2854 [Anoxybacillus sp. B2M1]",<br/> "cazygi 1024284646 gb ANB66085.1  hypothetical protein GFC29_2580 [Anoxybacillus sp. B7M1]",<br/> "cazygi 239807208 gb ACS24273.1  glycosidase PH1107-related [Geobacillus sp. WCH70]"]</p>                                                                                                                                                                                                                                                                                                                                      |
| <p>["cazygi 1027453386 gb AND84186.1  glycosidase [Clostridium tyrobutyricum]",<br/> "cazygi 1042047022 gb ANP68912.1  glycosidase [Clostridium tyrobutyricum]"]</p>                                                                                                                                                                                                                                                                                                                                                                                                                                                                   |
| <p>["cazygi 1032540981 gb ANG92560.1  glycosidase [Lelliottia amnigena]"]</p>                                                                                                                                                                                                                                                                                                                                                                                                                                                                                                                                                          |
| <p>["cazygi 1043656552 gb ANS75672.1  glycosidase [Paenibacillus yonginensis]"]</p>                                                                                                                                                                                                                                                                                                                                                                                                                                                                                                                                                    |
| <p>["cazygi 255344607 gb ACU03933.1  glycosidase PH1107-related [Pedobacter heparinus DSM 2366]"]</p>                                                                                                                                                                                                                                                                                                                                                                                                                                                                                                                                  |
| <p>["cazygi 257477059 gb ACV57378.1  glycosidase PH1107-related [Alicyclobacillus acidocaldarius subsp. acidocaldarius DSM 446]"]</p>                                                                                                                                                                                                                                                                                                                                                                                                                                                                                                  |
| <p>["cazygi 257477852 gb ACV58171.1  glycosidase PH1107-related [Alicyclobacillus acidocaldarius subsp. acidocaldarius DSM 446]"]</p>                                                                                                                                                                                                                                                                                                                                                                                                                                                                                                  |
| <p>["cazygi 302197954 gb ADL05525.1  glycosidase related protein [[Clostridium] saccharolyticum WM1]"]</p>                                                                                                                                                                                                                                                                                                                                                                                                                                                                                                                             |
| <p>["cazygi 306533137 gb ADN02671.1  putative glycosidase [Spirochaeta thermophila DSM 6192]",<br/> "cazygi 339412501 gb AEJ62066.1  glycosidase related protein [Spirochaeta thermophila DSM 6578]"]</p>                                                                                                                                                                                                                                                                                                                                                                                                                              |
| <p>["cazygi 32443505 emb CAD72947.1  conserved hypothetical protein [Rhodopirellula baltica SH 1]"]</p>                                                                                                                                                                                                                                                                                                                                                                                                                                                                                                                                |
| <p>["cazygi 339288290 gb AEJ42400.1  glycosidase [Alicyclobacillus acidocaldarius subsp. acidocaldarius Tc-4-1]"]</p>                                                                                                                                                                                                                                                                                                                                                                                                                                                                                                                  |
| <p>["cazygi 371590351 gb AEX54081.1  putative glycosylase [Rahnella aquatilis CIP 78.65 = ATCC 33071]",<br/> "cazygi 321170106 gb ADW75805.1  glycosidase related protein [Rahnella sp. Y9602]"]</p>                                                                                                                                                                                                                                                                                                                                                                                                                                   |
| <p>["cazygi 374849826 dbj BAL52831.1  hypothetical conserved protein [uncultured prokaryote]"]</p>                                                                                                                                                                                                                                                                                                                                                                                                                                                                                                                                     |
| <p>["cazygi 383801351 gb AFH48431.1  Putative glycosylase [Ignavibacterium album JCM 16511]"]</p>                                                                                                                                                                                                                                                                                                                                                                                                                                                                                                                                      |
| <p>["cazygi 384067260 emb CCH00470.1  glycosidase PH1107-related protein [Fibrella aestuarina BUZ 2]"]</p>                                                                                                                                                                                                                                                                                                                                                                                                                                                                                                                             |
| <p>["cazygi 430016147 gb AGA27861.1  putative glycosylase [Singulisphaera acidiphila DSM 18658]"]</p>                                                                                                                                                                                                                                                                                                                                                                                                                                                                                                                                  |
| <p>["cazygi 430735424 gb AGA59369.1  putative glycosylase [Thermobacillus composti KWC4]"]</p>                                                                                                                                                                                                                                                                                                                                                                                                                                                                                                                                         |
| <p>["cazygi 553906840 gb AGY76890.1  glycosidase related protein [Clostridium autoethanogenum DSM 10061]",<br/> "cazygi 300433903 gb ADK13670.1  putative glycosylase [Clostridium ljungdahlii DSM 13528]"]</p>                                                                                                                                                                                                                                                                                                                                                                                                                        |
| <p>["cazygi 575462749 gb AHG93800.1  glycosidase related protein (plasmid) [Gemmatirosa kalamazoonesis]"]</p>                                                                                                                                                                                                                                                                                                                                                                                                                                                                                                                          |
| <p>["cazygi 686549430 gb AIQ60126.1  glycosidase [Paenibacillus borealis]"]</p>                                                                                                                                                                                                                                                                                                                                                                                                                                                                                                                                                        |
| <p>["cazygi 686555438 gb AIQ66133.1  glycosidase [Paenibacillus stellifer]"]</p>                                                                                                                                                                                                                                                                                                                                                                                                                                                                                                                                                       |
| <p>["cazygi 68655705 gb AIQ66399.1  glycosidase [Paenibacillus graminis]",<br/> "cazygi 806910096 emb CQR51519.1  glycosidase related protein [Paenibacillus riograndensis SBR5]",<br/> "cazygi 686516280 gb AIQ26981.1  glycosidase [Paenibacillus sp. FSL P4-0081]",<br/> "cazygi 686528088 gb AIQ38787.1  glycosidase [Paenibacillus sp. FSL R5-0912]"]</p>                                                                                                                                                                                                                                                                         |
| <p>["cazygi 690615442 gb AIQ16655.1  glycosidase [Paenibacillus sp. FSL H7-0357]"]</p>                                                                                                                                                                                                                                                                                                                                                                                                                                                                                                                                                 |
| <p>["cazygi 695168010 gb AIT09333.1  glycosidase [Francisella sp. FSC1006]"]</p>                                                                                                                                                                                                                                                                                                                                                                                                                                                                                                                                                       |
| <p>["cazygi 728870108 gb AIY80771.1  glycosyl hydrolases 43 family protein [Clostridium botulinum 202F]",<br/> "cazygi 187722970 gb ACD24191.1  conserved hypothetical protein [Clostridium botulinum B str. Eklund 17B (NRP)],<br/> "cazygi 545681614 emb CDH90966.1  COG2152 predicted glycoside hydrolase [Clostridium botulinum B str. Eklund 17B (NRP)],<br/> "cazygi 188498409 gb ACD51545.1  unknwon conserved protein [Clostridium botulinum E3 str. Alaska E43]",<br/> "cazygi 749705022 gb AJF29534.1  glycosidase [Clostridium botulinum]",<br/> "cazygi 749710554 gb AJF32595.1  glycosidase [Clostridium botulinum]"]</p> |
| <p>["cazygi 755430297 gb AJJ86868.1  hypothetical protein AK38_125 [Yersinia pestis CO92]",<br/> "Ncazy ANW14472.1  glycosidase [Yersinia pestis]",<br/> "cazy AXY33556.1  glycosidase [Yersinia pseudotuberculosis]",<br/> "cazy AYM90937.1  glycosidase [Serratia sp. 3ACOL1]"]</p>                                                                                                                                                                                                                                                                                                                                                  |

|                                                                                                                     |
|---------------------------------------------------------------------------------------------------------------------|
| "cazygi 820755130 gb AKG72003.1  glycosidase [Serratia fonticola]",                                                 |
| "cazygi 908264718 gb AKT02677.1  hypothetical protein M486_3813 [Yersinia pestis 1045]",                            |
| "cazygi 908217808 gb AKS55794.1  hypothetical protein M479_819 [Yersinia pestis 1412]",                             |
| "cazygi 908238790 gb AKS76764.1  hypothetical protein M480_305 [Yersinia pestis 1413]",                             |
| "cazygi 908244811 gb AKS82782.1  hypothetical protein M481_2141 [Yersinia pestis 1522]",                            |
| "cazygi 908223667 gb AKS61650.1  hypothetical protein M478_551 [Yersinia pestis 2944]",                             |
| "cazygi 908259389 gb AKS97348.1  hypothetical protein M482_3682 [Yersinia pestis 3067]",                            |
| "cazygi 908255234 gb AKS93196.1  hypothetical protein M483_3786 [Yersinia pestis 3770]",                            |
| "cazygi 908246559 gb AKS84529.1  hypothetical protein M477_1652 [Yersinia pestis 790]",                             |
| "cazygi 908250010 gb AKS87975.1  hypothetical protein M484_436 [Yersinia pestis 8787]",                             |
| "cazygi 342854830 gb AEL73383.1  hypothetical protein A1122_13770 [Yersinia pestis A1122]",                         |
| "cazygi 162353816 gb ABX87764.1  conserved hypothetical protein [Yersinia pestis Angola]",                          |
| "cazygi 108779878 gb ABG13936.1  hypothetical protein YPA_1970 [Yersinia pestis Antiqua]",                          |
| "cazygi 320014697 gb ADV98268.1  hypothetical protein YPC_1654 [Yersinia pestis biovar Medievalis str. Harbin 35]", |
| "cazygi 45436946 gb AAS62499.1  putative glycosylase [Yersinia pestis biovar Microtus str. 91001]",                 |
| "cazygi 15980468 emb CAC91279.1  conserved hypothetical protein [Yersinia pestis CO92]",                            |
| "cazygi 262362349 gb ACY59070.1  hypothetical protein YPD4_2163 [Yersinia pestis D106004]",                         |
| "cazygi 262366341 gb ACY62898.1  hypothetical protein YPD8_2223 [Yersinia pestis D182038]",                         |
| "cazygi 755418713 gb AJJ31721.1  hypothetical protein CH61_1690 [Yersinia pestis]",                                 |
| "cazygi 755396092 gb AJJ13298.1  hypothetical protein CH46_2636 [Yersinia pestis]",                                 |
| "cazygi 755341047 gb AJK06559.1  hypothetical protein CH55_135 [Yersinia pestis]",                                  |
| "cazygi 755438037 gb AJJ38157.1  hypothetical protein CH62_1978 [Yersinia pestis]",                                 |
| "cazygi 21958517 gb AAM85283.1 AE013775_3 hypothetical [Yersinia pestis KIM10+]",                                   |
| "cazygi 805414091 gb AKB88847.1  hypothetical protein CH44_3749 [Yersinia pestis]",                                 |
| "cazygi 108775878 gb ABG18397.1  hypothetical protein YPN_2068 [Yersinia pestis Nepal516]",                         |
| "cazygi 755444841 gb AJJ44957.1  hypothetical protein CH63_545 [Yersinia pestis]",                                  |
| "cazygi 755292360 gb AJI89544.1  hypothetical protein CH59_14 [Yersinia pestis]",                                   |
| "cazygi 145210865 gb ABP40272.1  hypothetical protein YPDSF_1887 [Yersinia pestis Pestoides F]",                    |
| "cazygi 755461690 gb AJK26402.1  hypothetical protein CH43_3273 [Yersinia pestis Pestoides G]",                     |
| "cazygi 755357531 gb AJJ51421.1  hypothetical protein BZ15_1056 [Yersinia pestis]",                                 |
| "cazygi 755447598 gb AJK11582.1  hypothetical protein CH60_2211 [Yersinia pestis str. Pestoides B]",                |
| "cazygi 294354691 gb ADE65032.1  hypothetical protein YPZ3_2122 [Yersinia pestis Z176003]",                         |
| "cazygi 755390043 gb AJJ71613.1  hypothetical protein BZ23_2096 [Yersinia pseudotuberculosis]",                     |
| "cazygi 682104129 gb AIN16006.1  hypothetical protein DJ40_4027 [Yersinia pseudotuberculosis]",                     |
| "cazygi 755374609 gb AJJ07981.1  hypothetical protein BZ20_3694 [Yersinia pseudotuberculosis]",                     |
| "cazygi 152959496 gb ABS46957.1  conserved hypothetical protein [Yersinia pseudotuberculosis IP 31758]",            |
| "cazygi 51590118 emb CAH21753.1  conserved hypothetical protein [Yersinia pseudotuberculosis IP 32953]",            |
| "cazygi 755361980 gb AJJ55864.1  hypothetical protein BZ17_4122 [Yersinia pseudotuberculosis IP 32953]",            |
| "cazygi 755370962 gb AJJ04336.1  hypothetical protein BZ21_1812 [Yersinia pseudotuberculosis]",                     |
| "cazygi 186698940 gb ACC89569.1  glycosidase PH1107-related [Yersinia pseudotuberculosis PB1/+]",                   |
| "cazygi 755451715 gb AJK14889.1  hypothetical protein BZ19_1877 [Yersinia pseudotuberculosis str. PA3606]",         |
| "cazygi 169750412 gb ACA67930.1  glycosidase PH1107-related [Yersinia pseudotuberculosis YPIII]",                   |
| "cazygi 588288895 gb AHK21631.1  glycosidase [Yersinia similis]"                                                    |
| ["cazygi 764069457 gb AJR09471.1  hypothetical protein H744_2c2818 [Photobacterium gaetbulicola Gung47]"]           |

|                                                                                                                                                                                                                                                                                                                                                                                                                                                                                                                                                                                                                                                                                                                                                                                                                                                                                                                                                                                                                                                                                                                                                                                                                                                                                                                                                                                                                                                                                                                                                                                                                                                                                                                                                                                                                                                                                                                   |
|-------------------------------------------------------------------------------------------------------------------------------------------------------------------------------------------------------------------------------------------------------------------------------------------------------------------------------------------------------------------------------------------------------------------------------------------------------------------------------------------------------------------------------------------------------------------------------------------------------------------------------------------------------------------------------------------------------------------------------------------------------------------------------------------------------------------------------------------------------------------------------------------------------------------------------------------------------------------------------------------------------------------------------------------------------------------------------------------------------------------------------------------------------------------------------------------------------------------------------------------------------------------------------------------------------------------------------------------------------------------------------------------------------------------------------------------------------------------------------------------------------------------------------------------------------------------------------------------------------------------------------------------------------------------------------------------------------------------------------------------------------------------------------------------------------------------------------------------------------------------------------------------------------------------|
| ["cazy 808695811 gb AKD56650.1  glycosidase [Spirosoma radiotolerans]"]                                                                                                                                                                                                                                                                                                                                                                                                                                                                                                                                                                                                                                                                                                                                                                                                                                                                                                                                                                                                                                                                                                                                                                                                                                                                                                                                                                                                                                                                                                                                                                                                                                                                                                                                                                                                                                           |
| ["cazy 921143555 dbj BAS26641.1  glycosidase [Limnochorda pilosa]"]                                                                                                                                                                                                                                                                                                                                                                                                                                                                                                                                                                                                                                                                                                                                                                                                                                                                                                                                                                                                                                                                                                                                                                                                                                                                                                                                                                                                                                                                                                                                                                                                                                                                                                                                                                                                                                               |
| ["cazy 961446961 gb ALS25162.1  glycosidase [Paenibacillus naphthalenovorans]"]                                                                                                                                                                                                                                                                                                                                                                                                                                                                                                                                                                                                                                                                                                                                                                                                                                                                                                                                                                                                                                                                                                                                                                                                                                                                                                                                                                                                                                                                                                                                                                                                                                                                                                                                                                                                                                   |
| ["cazy AOL35885.1 glycosidase [Geobacillus thermoleovorans]",<br>"cazy ARA99753.1 glycosidase [Geobacillus thermodenitrificans]",<br>"cazy ASS87210.1 glycosidase [Geobacillus lituanicus]",<br>"cazy ASS98017.1 glycosidase [Geobacillus thermocatenulatus]",<br>"cazy ATA61571.1 glycosidase [Geobacillus stearothermophilus]",<br>"cazy ATO39034.1 glycosidase [Geobacillus thermodenitrificans]",<br>"cazy AUJ37061.1 glycosidase [[Bacillus] caldolyticus]",<br>"cazy AWO74588.1 glycosidase [Geobacillus thermoleovorans]",<br>"cazy 1049091670 gb ANX13869.1  glycosidase [Fictibacillus arsenicus]",<br>"cazy 56381647 dbj BAD77555.1  unknwon conserved protein [Geobacillus kaustophilus HTA426]",<br>"cazy 831465583 gb AKM20513.1  Beta-1", "4-mannooligosaccharide phosphorylase [Geobacillus sp. 12AMOR1]",<br>"cazy 297254748 gb ADI28194.1  glycosidase related protein [Geobacillus sp. C56-T3]",<br>"cazy 445208365 gb AGE23830.1  glycosidase-like protein [Geobacillus sp. GH01]",<br>"cazy 530459040 gb AGT33616.1  glycosidase [Geobacillus sp. JF8]",<br>"cazy 1005661602 gb AMQ21821.1  glycosidase [Geobacillus sp. JS12]",<br>"cazy 909997033 gb AKU26540.1  glycosidase [Geobacillus sp. LC300]",<br>"cazy 317113247 gb ADU95739.1  glycosidase related protein [Geobacillus sp. Y412MC52]",<br>"cazy 261377168 gb ACX79911.1  glycosidase PH1107-related protein [Geobacillus sp. Y412MC61]",<br>"cazy 922673678 gb ALA70195.1  glycosidase [Geobacillus stearothermophilus 10]",<br>"cazy 1016892674 gb AMX85135.1  glycosidase [Geobacillus subterraneus]",<br>"cazy 359286548 gb AEV18232.1  hypothetical protein GTCCBUS3UF5_9090 [Geobacillus thermoleovorans CCB_US3_UF5]",<br>"cazy 359289298 gb AEV20982.1  hypothetical protein GTCCBUS3UF5_36820 [Geobacillus thermoleovorans CCB_US3_UF5]",<br>"cazy 1015430632 gb AMV12421.1  glycosidase [Geobacillus thermoleovorans]"] |
| ["cazy AOM76197.1 glycosidase [Pedobacter steynii]",<br>"cazy 1008900574 gb AMR32239.1  glycosidase [Mucilaginibacter sp. PAMC 26640]"]                                                                                                                                                                                                                                                                                                                                                                                                                                                                                                                                                                                                                                                                                                                                                                                                                                                                                                                                                                                                                                                                                                                                                                                                                                                                                                                                                                                                                                                                                                                                                                                                                                                                                                                                                                           |
| ["cazy AOM80960.1 glycosidase [Pedobacter steynii]"]                                                                                                                                                                                                                                                                                                                                                                                                                                                                                                                                                                                                                                                                                                                                                                                                                                                                                                                                                                                                                                                                                                                                                                                                                                                                                                                                                                                                                                                                                                                                                                                                                                                                                                                                                                                                                                                              |
| ["cazy AOP88942.1 glycosidase [Enterobacter kobei]",<br>"cazy ASE43069.1 glycosidase [Citrobacter braakii]",<br>"cazy AST78187.1 glycosidase [Citrobacter farmeri]",<br>"cazy AUJ83518.1 glycosidase [Enterobacter cancerogenus]",<br>"cazy AUV28075.1 glycosidase [Citrobacter freundii complex sp. CFNIH3]",<br>"cazy AYL04052.1 glycosidase [Enterobacter kobei]",<br>"cazy AYN28795.1 glycosidase [Buttiauxella sp. 3AFRM03]",<br>"humangut888063.HMPREF9086_4365 [Complete]:- codon-table.11",<br>"cazy 742984607 gb AJB69241.1  glycosidase [Enterobacter hormaechei subsp. hormaechei]",<br>"cazy 723224067 gb AIX56719.1  glycosidase [Enterobacter cloacae]",<br>"cazy 400177221 gb AFP72070.1  putative glycosylase [Enterobacter cloacae subsp. cloacae ENHKU01]",<br>"cazy 1020389709 gb AMZ76608.1  glycosidase [Enterobacter sp. ODB01]",<br>"cazy 440047269 gb AGB78327.1  putative glycosylase [Enterobacteriaceae bacterium strain FGI 57]"]                                                                                                                                                                                                                                                                                                                                                                                                                                                                                                                                                                                                                                                                                                                                                                                                                                                                                                                                                     |
| ["cazy APB30668.1 glycosidase [Vagococcus teuberi]"]                                                                                                                                                                                                                                                                                                                                                                                                                                                                                                                                                                                                                                                                                                                                                                                                                                                                                                                                                                                                                                                                                                                                                                                                                                                                                                                                                                                                                                                                                                                                                                                                                                                                                                                                                                                                                                                              |
| ["cazy APM80098.1 glycosidase [Parageobacillus thermoglucosidasius]",                                                                                                                                                                                                                                                                                                                                                                                                                                                                                                                                                                                                                                                                                                                                                                                                                                                                                                                                                                                                                                                                                                                                                                                                                                                                                                                                                                                                                                                                                                                                                                                                                                                                                                                                                                                                                                             |

|                                                                                                               |
|---------------------------------------------------------------------------------------------------------------|
| "cazygi 311217674 gb ADP76278.1  glycosidase related protein [Geobacillus sp. Y4.1MC1]",                      |
| "cazygi 335363887 gb AEH49567.1  glycosidase related protein [Geobacillus thermoglucosidasius C56-YS93]",     |
| "cazygi 929559699 gb ALF09277.1  glycosidase [Geobacillus thermoglucosidasius]",                              |
| "cazygi 1050291544 gb ANZ29359.1  glycosidase [Geobacillus thermoglucosidasius]"                              |
| ["cazy APW63726.1 beta-mannosaccharide phosphorylase or inverting beta-mannosidase [Paludisphaera borealis]", |
| "cazygi 1015455907 gb AMV37689.1  Beta-1", "4-mannooligosaccharide phosphorylase [Planctomyces sp. SH-PL62]"  |
| ["cazy AQG78684.1 glycosidase [Spirosoma montaniterrae]"                                                      |
| ["cazy AQQ71142.1 Beta-1", "4-mannooligosaccharide phosphorylase [Phycisphaerae bacterium SM-Chi-D1]"         |
| ["cazy AQT69235.1 Beta-1", "4-mannooligosaccharide phosphorylase [Phycisphaerae bacterium ST-NAGAB-D1]"       |
| ["cazy ARI76287.1 glycosidase [Halobacillus mangrovi]"                                                        |
| ["cazy ARK13695.1 glycosidase [Fibrella sp. ES10-3-2-2]"                                                      |
| ["cazy ARN56426.1 Beta-1", "4-mannooligosaccharide phosphorylase [Sedimentisphaera salicampi]"                |
| ["cazy ARP44250.1 4-O-beta-D-mannosyl-D-glucose phosphorylase [Geobacillus thermodenitrificans]",             |
| "cazygi 134268352 gb ABO68547.1  Conserved hypothetical protein [Geobacillus thermodenitrificans NG80-2]",    |
| "cazygi 961451687 gb ALS29887.1  glycosidase [Paenibacillus sp. 32O-W]"                                       |
| ["cazy ARS41135.1 glycosidase [Sphingobacteriaceae bacterium GW460-11-11-14-LB5]",                            |
| "cazy AXB57297.1 glycosidase [Flavobacterium sp. HYN0086]"                                                    |
| ["cazy ARV07385.1 glycosidase [Polaribacter sp. SA4-10]",                                                     |
| "cazy ASO04138.1 1", "4-beta-mannosyl-N-acetylglucosamine phosphorylase [Arenibacter algicola]"               |
| ["cazy ASA26088.1 glycosidase [Paenibacillus donghaensis]"                                                    |
| ["cazy ASS66915.1 glycosidase [Paenibacillus sp. RUD330]",                                                    |
| "cazy AVV55254.1 glycosidase [Paenibacillus glucanolyticus]",                                                 |
| "cazy AYB46670.1 glycosidase [Paenibacillus lautus]",                                                         |
| "cazy AYQ71337.1 glycosidase [Cohnella sp. 18JY8-7]",                                                         |
| "cazy AYQ74948.1 glycosidase [Cohnella sp. 18JY8-7]",                                                         |
| "cazy SMF87879.1 Predicted glycosyl hydrolase", "GH43/DUF377 family [Paenibacillus uliginis N3/975]",         |
| "cazygi 1022706313 gb ANA80675.1  glycosidase [Paenibacillus glucanolyticus]",                                |
| "cazygi 690624393 gb AIQ25407.1  glycosidase [Paenibacillus sp. FSL H7-0737]",                                |
| "cazygi 686526420 gb AIQ37120.1  glycosidase [Paenibacillus sp. FSL R5-0345]",                                |
| "cazygi 766904484 gb AJS61216.1  glycosidase [Paenibacillus sp. IHBB 10380]",                                 |
| "cazygi 1049759967 gb ANY73220.1  glycosidase [Paenibacillus sp. IHBB 9852]",                                 |
| "cazygi 247547003 gb ACT04022.1  glycosidase PH1107-related [Paenibacillus sp. JDR-2]",                       |
| "cazygi 261280906 gb ACX62877.1  glycosidase PH1107-related protein [Paenibacillus sp. Y412MC10]",            |
| "cazygi 1028465960 gb ANE48883.1  glycosidase [Paenibacillus swuensis]"                                       |
| ["cazy ASS88943.1 glycosidase [Aeribacillus pallidus]"                                                        |
| ["cazy AUD00665.1 glycosidase [Spirosoma pollinicola]",                                                       |
| "cazygi 283814993 gb ADB36831.1  glycosidase PH1107-related protein [Spirosoma linguale DSM 74]"              |
| ["cazy AUP79214.1 glycosidase [Flavivirga eckloniae]"                                                         |
| ["cazy AWA31523.1 glycosidase [Flavobacterium sp. HYN0048]"                                                   |
| ["cazy AWI10611.1 glycosidase [Ereboglobus luteus]"                                                           |
| ["cazy AXP79353.1 Beta-1-2C4-mannooligosaccharide phosphorylase [Mariniflexile sp. TRM1-10]"                  |
| ["cazy AXY72757.1 glycosidase [Pseudoflavitalea sp. 5GH32-13]"                                                |
| ["cazy AYA09469.1 glycosidase [Rahnella aquatilis]"                                                           |

|                                                                                                                                                                                                                                                                                                                                                                                                                                                                                                                                                                                                                                                                                                                                                                                                                                                                                                                                                                        |
|------------------------------------------------------------------------------------------------------------------------------------------------------------------------------------------------------------------------------------------------------------------------------------------------------------------------------------------------------------------------------------------------------------------------------------------------------------------------------------------------------------------------------------------------------------------------------------------------------------------------------------------------------------------------------------------------------------------------------------------------------------------------------------------------------------------------------------------------------------------------------------------------------------------------------------------------------------------------|
| "cazygi 380756103 gb AFE60494.1  glycosidase-like protein [Rahnella aquatilis HX2]"                                                                                                                                                                                                                                                                                                                                                                                                                                                                                                                                                                                                                                                                                                                                                                                                                                                                                    |
| ["cazy AYB35551.1 glycosidase [Chryseolinea sp. KIS68-18]"]                                                                                                                                                                                                                                                                                                                                                                                                                                                                                                                                                                                                                                                                                                                                                                                                                                                                                                            |
| ["cazy AYF99945.1 glycosidase [Lactococcus sp. 1JSPR-7]"]                                                                                                                                                                                                                                                                                                                                                                                                                                                                                                                                                                                                                                                                                                                                                                                                                                                                                                              |
| ["cazy BAX79962.1 glycosidase [Marinifilaceae bacterium SPP2]",<br>"humangutMH0014_GL0051264 [gene] locus=scaffold54938_2:3608:4654:+ [Complete] codon-table.11",<br>"humangutMH0037_GL0005385 [gene] locus=scaffold47410_3:5545:6591:+ [Complete] codon-table.11",<br>"humangutMH0035_GL0084958 [gene] locus=scaffold33310_4:54850:55896:- [Complete] codon-table.11",<br>"humangutT2D-109A_GL0063585 [gene] locus=scaffold60146_4:129:1175:+ [Complete] codon-table.11",<br>"humangut764588959-stool1_revised_scaffold38709_2_gene87075 strand:+ start:15730 stop:16776 length:1047 start_codon:yes stop_codon:yes gene_type:complete<br>[Complete] codon-table.11",<br>"mouseS-Fe12_GL0087179 [gene] locus=scaffold23004_1:5238:6284:+ [Complete] codon-table.11",<br>"mouseMC-0-1_GL0004796 [gene] locus=scaffold2636_8:8463:9509:- [Complete] codon-table.11",<br>"mouse1A-dyr2-07_GL0030949 [gene] locus=scaffold11171_4:8010:9056:- [Complete] codon-table.11"] |
| ["cazy SCV07281.1 hypothetical protein BACOV975_01042 [Bacteroides ovatus V975]",<br>"mouseG1-6A_GL0040776 [gene] locus=scaffold19912_9:1208:2266:- [Complete] codon-table.11",<br>"cazygi 938483646 gb ALJ47877.1  Beta-1", "4-mannooligosaccharide phosphorylase [Bacteroides ovatus]",<br>"cazygi 1045274582 gb ANU59273.1  glycosidase [Bacteroides sp. I48]",<br>"cazygi 295085869 emb CBK67392.1  Predicted glycosylase [Bacteroides xylanisolvens XB1A]"]                                                                                                                                                                                                                                                                                                                                                                                                                                                                                                       |
| ["humangut158337416-stool1_revised_scaffold30369_1_gene206870 strand:- start:11597 stop:12682 length:1086 start_codon:yes stop_codon:yes gene_type:complete<br>[Complete] codon-table.11",<br>"humangut457396.CSBG_00342 [Complete]:- codon-table.11",<br>"pigEYZ-542B_GL0066681 [gene] locus=scaffold86043_2:1290:2375:- [Complete] codon-table.11"]                                                                                                                                                                                                                                                                                                                                                                                                                                                                                                                                                                                                                  |
| ["humangut159611913-stool1_revised_scaffold5797_1_gene123151 strand:- start:2 stop:679 length:678 start_codon:yes stop_codon:no gene_type:incomplete [Lack 3'-end]<br>codon-table.11"]                                                                                                                                                                                                                                                                                                                                                                                                                                                                                                                                                                                                                                                                                                                                                                                 |
| ["humangut340101.Vvad_PD1448 [Complete]:- codon-table.11"]                                                                                                                                                                                                                                                                                                                                                                                                                                                                                                                                                                                                                                                                                                                                                                                                                                                                                                             |
| ["humangutDLM006_GL0005590 [gene] locus=scaffold29343_2:3:1100:+ [Lack 5'-end] codon-table.11"]                                                                                                                                                                                                                                                                                                                                                                                                                                                                                                                                                                                                                                                                                                                                                                                                                                                                        |
| ["humangutMH0012_GL0142045 [gene] locus=scaffold26779_1:67335:68417:+ [Complete] codon-table.11",<br>"mouseGroup2-3A_GL0213569 [gene] locus=scaffold128315_2:21860:22942:- [Complete] codon-table.11"]                                                                                                                                                                                                                                                                                                                                                                                                                                                                                                                                                                                                                                                                                                                                                                 |
| ["humangutMH0014_GL0069724 [gene] locus=scaffold49710_2:3757:4800:- [Complete] codon-table.11",<br>"humangutMH0159_GL0085170 [gene] locus=scaffold12930_17:350:1393:- [Complete] codon-table.11",<br>"humangutV1.CD3-3-PN_GL0029462 [gene] locus=scaffold25745_2:4954:5997:+ [Complete] codon-table.11",<br>"humangutT2D-63A_GL0036826 [gene] locus=scaffold39161_1:12178:13221:+ [Complete] codon-table.11",<br>"pigPIG-007_GL0142532 [gene] locus=scaffold73421_3:2214:3257:+ [Complete] codon-table.11",<br>"pigPIG-041_GL0038390 [gene] locus=scaffold57657_1:12268:13311:+ [Complete] codon-table.11",<br>"rumen553_GL0119562_1 [gene] locus=scaffold98429_1:36766:37809:+ [Complete]"]                                                                                                                                                                                                                                                                           |
| ["humangutMH0014_GL0073411 [gene] locus=scaffold14920_1:6186:7241:- [Complete] codon-table.11",<br>"humangutNLF006_GL0047622 [gene] locus=scaffold12808_1:37:1092:- [Lack 5'-end] codon-table.11",<br>"pigPIG-020_GL0032968 [gene] locus=scaffold71803_1:61:1116:+ [Complete] codon-table.11"]                                                                                                                                                                                                                                                                                                                                                                                                                                                                                                                                                                                                                                                                         |
| ["humangutMH0016_GL0015997 [gene] locus=scaffold43604_2:1158:2207:+ [Complete] codon-table.11"]                                                                                                                                                                                                                                                                                                                                                                                                                                                                                                                                                                                                                                                                                                                                                                                                                                                                        |
| ["humangutMH0055_GL0053168 [gene] locus=C955156_1:2878:3924:- [Complete] codon-table.11",<br>"humangutMH0196_GL0196356 [gene] locus=scaffold48076_5:453:1499:+ [Complete] codon-table.11"]                                                                                                                                                                                                                                                                                                                                                                                                                                                                                                                                                                                                                                                                                                                                                                             |
| ["humangutMH0062_GL0010083 [gene] locus=scaffold4489_4:5033:6097:+ [Complete] codon-table.11"]                                                                                                                                                                                                                                                                                                                                                                                                                                                                                                                                                                                                                                                                                                                                                                                                                                                                         |
| ["humangutMH0097_GL0032324 [gene] locus=scaffold855_9:15133:16173:- [Complete] codon-table.11"]                                                                                                                                                                                                                                                                                                                                                                                                                                                                                                                                                                                                                                                                                                                                                                                                                                                                        |
| ["humangutMH0105_GL0062872 [gene] locus=scaffold61381_1:8141:9193:- [Complete] codon-table.11",                                                                                                                                                                                                                                                                                                                                                                                                                                                                                                                                                                                                                                                                                                                                                                                                                                                                        |



|                                                                                                                                                                                                                                                                                                                                                                                                                                                                                                                                                                                                                                                                                                               |
|---------------------------------------------------------------------------------------------------------------------------------------------------------------------------------------------------------------------------------------------------------------------------------------------------------------------------------------------------------------------------------------------------------------------------------------------------------------------------------------------------------------------------------------------------------------------------------------------------------------------------------------------------------------------------------------------------------------|
| "humangutMH0413_GL0067116 [gene] locus=C1802962_1:5426:6478:+ [Complete] codon-table.11",                                                                                                                                                                                                                                                                                                                                                                                                                                                                                                                                                                                                                     |
| "humangutO2.UC18-1_GL0036015 [gene] locus=scaffold66669_1:29141:30193:- [Complete] codon-table.11"]                                                                                                                                                                                                                                                                                                                                                                                                                                                                                                                                                                                                           |
| ["humangutMH0115_GL0027027 [gene] locus=scaffold58318_2:449:1198:- [Complete] codon-table.11"]                                                                                                                                                                                                                                                                                                                                                                                                                                                                                                                                                                                                                |
| ["humangutMH0189_GL0168818 [gene] locus=scaffold70100_4:3:560:- [Lack both ends] codon-table.11"]                                                                                                                                                                                                                                                                                                                                                                                                                                                                                                                                                                                                             |
| ["humangutMH0196_GL0120768 [gene] locus=scaffold59375_8:3537:4595:+ [Complete] codon-table.11"]                                                                                                                                                                                                                                                                                                                                                                                                                                                                                                                                                                                                               |
| ["humangutMH0211_GL0167548 [gene] locus=scaffold39813_1:6555:7661:+ [Complete] codon-table.11"]                                                                                                                                                                                                                                                                                                                                                                                                                                                                                                                                                                                                               |
| ["humangutMH0220_GL0201857 [gene] locus=scaffold42842_1:133:1167:+ [Complete] codon-table.11"]                                                                                                                                                                                                                                                                                                                                                                                                                                                                                                                                                                                                                |
| ["humangutMH0239_GL0137758 [gene] locus=scaffold11517_17:1161:2219:+ [Complete] codon-table.11"]                                                                                                                                                                                                                                                                                                                                                                                                                                                                                                                                                                                                              |
| ["humangutMH0243_GL0119314 [gene] locus=scaffold15770_15:295:1017:- [Lack 5'-end] codon-table.11"]                                                                                                                                                                                                                                                                                                                                                                                                                                                                                                                                                                                                            |
| ["humangutMH0280_GL0025120 [gene] locus=scaffold65354_3:436:1467:+ [Complete] codon-table.11"]                                                                                                                                                                                                                                                                                                                                                                                                                                                                                                                                                                                                                |
| ["humangutMH0290_GL0113903 [gene] locus=scaffold97851_3:12401:13456:+ [Complete] codon-table.11",<br>"cazygi 324318222 gb ADY36113.1  glycosidase related protein [Bacteroides salanitronis DSM 18170]"]                                                                                                                                                                                                                                                                                                                                                                                                                                                                                                      |
| ["humangutMH0303_GL0040232 [gene] locus=scaffold4470_4:133:1119:+ [Complete] codon-table.11"]                                                                                                                                                                                                                                                                                                                                                                                                                                                                                                                                                                                                                 |
| ["humangutMH0303_GL0115766 [gene] locus=scaffold35690_12:457:1518:- [Complete] codon-table.11"]                                                                                                                                                                                                                                                                                                                                                                                                                                                                                                                                                                                                               |
| ["humangutMH0358_GL0145329 [gene] locus=scaffold15796_1:4275:5348:- [Complete] codon-table.11"]                                                                                                                                                                                                                                                                                                                                                                                                                                                                                                                                                                                                               |
| ["humangutMH0372_GL0113203 [gene] locus=scaffold6873_1:18256:19350:+ [Complete] codon-table.11"]                                                                                                                                                                                                                                                                                                                                                                                                                                                                                                                                                                                                              |
| ["humangutMH0378_GL0064238 [gene] locus=scaffold58681_7:760:1689:- [Lack 5'-end] codon-table.11"]                                                                                                                                                                                                                                                                                                                                                                                                                                                                                                                                                                                                             |
| ["humangutMH0441_GL0146058 [gene] locus=scaffold27271_4:148:1233:- [Complete] codon-table.11",<br>"humangut763496533-stool2_revised_C1197182_1_gene53282 strand:+ start:1541 stop:2626 length:1086 start_codon:yes stop_codon:yes gene_type:complete [Complete] codon-table.11"]                                                                                                                                                                                                                                                                                                                                                                                                                              |
| ["humangutN051A_GL0058783 [gene] locus=scaffold22037_2:3361:4422:+ [Complete] codon-table.11"]                                                                                                                                                                                                                                                                                                                                                                                                                                                                                                                                                                                                                |
| ["humangutO2.UC24-1_GL0037345 [gene] locus=scaffold29098_7:2:2731:+ [Lack both ends] codon-table.11"]                                                                                                                                                                                                                                                                                                                                                                                                                                                                                                                                                                                                         |
| ["humangutO2.UC24-2_GL0099256 [gene] locus=scaffold7692_4:3069:4112:- [Complete] codon-table.11"]                                                                                                                                                                                                                                                                                                                                                                                                                                                                                                                                                                                                             |
| ["humangutO2.UC8-0_GL0115872 [gene] locus=scaffold69940_1:6116:7165:- [Complete] codon-table.11",<br>"pigPIG-094_GL0135180 [gene] locus=scaffold164212_1:11777:12826:- [Complete] codon-table.11",<br>"pigBHZ-9B_GL0130273 [gene] locus=scaffold24258_1:10658:11707:- [Complete] codon-table.11",<br>"rumen553_GL0522716_1 [gene] locus=scaffold280765_3:6549:7598:-[Complete]",<br>"rumen552_GL1343129_1 [gene] locus=scaffold21669_1:24548:25597:+[Complete]",<br>"rumen583_GL0213147_1 [gene] locus=scaffold275383_4:3456:4505:+[Complete]",<br>"rumen554_GL2251975_1 [gene] locus=scaffold628736_2:7267:8316:+[Complete]",<br>"rumen554_GL2623584_1 [gene] locus=scaffold409446_1:4020:5069:+[Complete]"] |
| ["humangutT2D-132A_GL0027678 [gene] locus=scaffold9899_2:238:984:- [Complete] codon-table.11"]                                                                                                                                                                                                                                                                                                                                                                                                                                                                                                                                                                                                                |
| ["humangutT2D-176A_GL0103346 [gene] locus=scaffold5807_1:1:537:- [Lack both ends] codon-table.11"]                                                                                                                                                                                                                                                                                                                                                                                                                                                                                                                                                                                                            |
| ["humangutT2D-22A_GL0041535 [gene] locus=scaffold22674_3:10035:11006:- [Complete] codon-table.11"]                                                                                                                                                                                                                                                                                                                                                                                                                                                                                                                                                                                                            |
| ["humangutT2D-62A_GL0056684 [gene] locus=scaffold171_35:4359:5444:- [Complete] codon-table.11"]                                                                                                                                                                                                                                                                                                                                                                                                                                                                                                                                                                                                               |
| ["humangutV1.FI14_GL0248150 [gene] locus=scaffold36117_2:569:1639:+ [Complete] codon-table.11"]                                                                                                                                                                                                                                                                                                                                                                                                                                                                                                                                                                                                               |
| ["humangutV1.FI17_GL0002751 [gene] locus=scaffold101446_1:8612:9712:- [Complete] codon-table.11"]                                                                                                                                                                                                                                                                                                                                                                                                                                                                                                                                                                                                             |
| ["humangutV1.UC11-5_GL0177487 [gene] locus=scaffold7500_5:514:1278:+ [Lack 3'-end] codon-table.11"]                                                                                                                                                                                                                                                                                                                                                                                                                                                                                                                                                                                                           |
| ["mouse1-1_GL0019987 [gene] locus=scaffold73066_8:602:1675:+ [Complete] codon-table.11"]                                                                                                                                                                                                                                                                                                                                                                                                                                                                                                                                                                                                                      |
| ["mouse2-5_GL0007716 [gene] locus=scaffold26666_5:148:1215:- [Complete] codon-table.11"]                                                                                                                                                                                                                                                                                                                                                                                                                                                                                                                                                                                                                      |
| ["mouse2-7_GL0062403 [gene] locus=scaffold11147_18:1649:2725:- [Complete] codon-table.11",<br>"mouse4-8_GL0081522 [gene] locus=scaffold81590_1_2:4674:5750:- [Complete] codon-table.11"]                                                                                                                                                                                                                                                                                                                                                                                                                                                                                                                      |
| ["mouse5-3_GL0042311 [gene] locus=scaffold26612_23:1:1095:+ [Lack 5'-end] codon-table.11"]                                                                                                                                                                                                                                                                                                                                                                                                                                                                                                                                                                                                                    |

|                                                                                                                                                                                         |
|-----------------------------------------------------------------------------------------------------------------------------------------------------------------------------------------|
| ["mouse7-1_GL0049658 [gene] locus=scaffold3842_2:438:1538:+ [Complete] codon-table.11"]                                                                                                 |
| ["mouse7_GL0026892 [gene] locus=scaffold8143_5:3:569:- [Lack both ends] codon-table.11"]                                                                                                |
| ["mouse8-1_GL0050491 [gene] locus=scaffold80992_5:3:860:- [Lack both ends] codon-table.11"]                                                                                             |
| ["mouse8-7_GL0075670 [gene] locus=scaffold6819_16:1014:2105:+ [Complete] codon-table.11"]                                                                                               |
| ["mouse8-8_GL0049431 [gene] locus=scaffold47381_1:127:810:+ [Lack 3'-end] codon-table.11"]                                                                                              |
| ["mouseG1-3A_GL0088964 [gene] locus=scaffold56982_1:21876:22949:+ [Complete] codon-table.11"]                                                                                           |
| ["mouseGroup2-3A_GL0117339 [gene] locus=scaffold66609_8:1:864:- [Lack 3'-end] codon-table.11"]                                                                                          |
| ["mouseMC-6-2_GL0009829 [gene] locus=scaffold3586_4:4248:5288:- [Complete] codon-table.11"]                                                                                             |
| ["pigBMZ-14B_GL0021115 [gene] locus=C754686_1:132:875:+ [Lack 3'-end] codon-table.11"]                                                                                                  |
| ["pigPIG-001_GL0136080 [gene] locus=scaffold35781_2:90:1133:+ [Complete] codon-table.11",<br>"pigPIG-049_GL0022449 [gene] locus=scaffold31742_4:1518:2561:+ [Complete] codon-table.11"] |
| ["pigPIG-006_GL0221372 [gene] locus=scaffold53550_3:1406:2050:+ [Complete] codon-table.11"]                                                                                             |
| ["pigPIG-011_GL0203320 [gene] locus=scaffold157161_3:3:815:+ [Lack both ends] codon-table.11"]                                                                                          |
| ["pigPIG-033_GL0111560 [gene] locus=scaffold146717_1:3179:3592:+ [Lack 3'-end] codon-table.11"]                                                                                         |
| ["pigZXZ-8B_GL0225664 [gene] locus=scaffold83522_1:476:1519:- [Complete] codon-table.11"]                                                                                               |
| ["rumen0081_GL0710021_1 [gene] locus=scaffold467528_3:224:1282:- [Complete]"]                                                                                                           |
| ["rumen0081_GL1007727_1 [gene] locus=scaffold390530_7:1:501:+ [Lack 5'-end]"]                                                                                                           |
| ["rumen0081_GL1287973_1 [gene] locus=C39534641_1:2:1033:+ [Lack 5'-end]"]                                                                                                               |
| ["rumen0081_GL1837401_1 [gene] locus=scaffold390530_6:5921:6400:+ [Lack 3'-end]"]                                                                                                       |
| ["rumen100058_GL1198898_1 [gene] locus=scaffold3188968_4:547:1566:+ [Complete]"]                                                                                                        |
| ["rumen100058_GL1216971_1 [gene] locus=scaffold1156004_3:2:583:- [Lack both ends]"]                                                                                                     |
| ["rumen2009040_GL2109527_1 [gene] locus=scaffold1839399_3:1:567:+ [Lack both ends]"]                                                                                                    |
| ["rumen2009040_GL2738549_1 [gene] locus=scaffold1323786_1:1:573:- [Lack both ends]"]                                                                                                    |
| ["rumen553_GL0463185_1 [gene] locus=scaffold362985_1:2:595:+ [Lack both ends]"]                                                                                                         |
| ["rumen554_GL2751937_1 [gene] locus=scaffold1270830_2:111:614:+ [Lack 3'-end]"]                                                                                                         |
| ["rumen7049_GL0273481_1 [gene] locus=scaffold171004_5:2075:3049:- [Complete]"]                                                                                                          |
| ["rumen7049_GL0840078_1 [gene] locus=scaffold771181_2:2:823:- [Lack 3'-end]"]                                                                                                           |

## C5

|                                                                                                                                                                                                                                          |
|------------------------------------------------------------------------------------------------------------------------------------------------------------------------------------------------------------------------------------------|
| ["cazyCCgij339731040 emb CAZ94304.1 β-1", "3-mannooligosaccharide phosphorylase_Putative glycoside hydrolase [Zobellia galactanivorans]"]                                                                                                |
| ["cazygi 1043655617 gb ANS74737.1  glycosidase [Paenibacillus yonginensis]"]                                                                                                                                                             |
| ["cazygi 145411098 gb ABP68102.1  glycosidase", " PH1107-related protein [Caldicellulosiruptor saccharolyticus DSM 8903]"]                                                                                                               |
| ["cazygi 247546669 gb ACT03688.1  glycosidase PH1107-related [Paenibacillus sp. JDR-2]"]                                                                                                                                                 |
| ["cazygi 333741104 gb AEF86594.1  glycosylase [Treponema primitia ZAS-2]"]                                                                                                                                                               |
| ["cazygi 548726044 gb AGX07472.1  glycosidase [Bacteroides sp. CF50]"]                                                                                                                                                                   |
| ["cazygi 573472633 gb AHF89644.1  glycosidase [Opitutaceae bacterium TAV5]"]                                                                                                                                                             |
| ["cazygi 937514713 gb ALI35200.1  Beta-1", "4-mannooligosaccharide phosphorylase [Thaumarchaeota archaeon MY3]"]                                                                                                                         |
| ["cazygi 937516583 gb ALI37070.1  Beta-1", "4-mannooligosaccharide phosphorylase [Thaumarchaeota archaeon MY3]"]                                                                                                                         |
| ["cazygi 961449486 gb ALS27686.1  glycosidase [Paenibacillus sp. 32O-W],<br>"cazygi 1049754616 gb ANY67870.1  glycosidase [Paenibacillus sp. BIHB4019],<br>"cazygi 1049761654 gb ANY74907.1  glycosidase [Paenibacillus sp. IHBB 9852]"] |
| ["cazy AOS44340.1  Beta-1", "4-mannooligosaccharide phosphorylase [Lacunisphaera limnophila]"]                                                                                                                                           |
| ["cazy APU09962.1  glycosidase [Cellulophaga lytica]"]                                                                                                                                                                                   |

|                                                                                                                                                                                                                                                                                                                                                                                                                                                                                                                                                                                                                                                                                                                                                                                                                                                                                                                                                                                                   |
|---------------------------------------------------------------------------------------------------------------------------------------------------------------------------------------------------------------------------------------------------------------------------------------------------------------------------------------------------------------------------------------------------------------------------------------------------------------------------------------------------------------------------------------------------------------------------------------------------------------------------------------------------------------------------------------------------------------------------------------------------------------------------------------------------------------------------------------------------------------------------------------------------------------------------------------------------------------------------------------------------|
| <p>"cazylg 319422203 gb ADV49312.1  glycosidase related protein [Cellulophaga algicola DSM 14237]",</p> <p>"cazylg 730598614 gb AIZ41409.1  glycosidase [Cellulophaga baltica 18]",</p> <p>"cazylg 723619670 gb AIY13042.1  glycosidase [Cellulophaga baltica NN016038]",</p> <p>"cazylg 324321587 gb ADY29052.1  glycosidase related protein [Cellulophaga lytica DSM 7489]",</p> <p>"cazylg 682032970 gb AIM60094.1  glycosidase [Cellulophaga lytica]"</p>                                                                                                                                                                                                                                                                                                                                                                                                                                                                                                                                     |
| <p>["cazy APU67656.1 glycosidase [Gramella flava JLT2011]"]</p>                                                                                                                                                                                                                                                                                                                                                                                                                                                                                                                                                                                                                                                                                                                                                                                                                                                                                                                                   |
| <p>["cazy APZ44771.1 glycosidase [Polaribacter reichenbachii]",</p> <p>"cazy AUC18635.1 glycosidase [Polaribacter reichenbachii]",</p> <p>"cazy SDR76681.1 Predicted glycosyl hydrolase", GH43/DUF377 family [Polaribacter sp. KT25b]",</p> <p>"cazy SDS17865.1 Predicted glycosyl hydrolase", GH43/DUF377 family [Winogradskyella sp. RHA_55]"</p>                                                                                                                                                                                                                                                                                                                                                                                                                                                                                                                                                                                                                                               |
| <p>["cazy AQQ69861.1 Beta-1", "4-mannooligosaccharide phosphorylase [Phycisphaerae bacterium SM-Chi-D1]"]</p>                                                                                                                                                                                                                                                                                                                                                                                                                                                                                                                                                                                                                                                                                                                                                                                                                                                                                     |
| <p>["cazy ARV07990.1 glycosidase [Polaribacter sp. SA4-10]",</p> <p>"humangutMH0302_GL0042500 [gene] locus=scaffold44658_4:10707:11720:+ [Complete] codon-table.11",</p> <p>"humangutNLM023_GL10107797 [gene] locus=scaffold7778_4:8646:9659:+ [Complete] codon-table.11",</p> <p>"mouseGroup2-5A_GL0019481 [gene] locus=scaffold8542_25:2043:3056:- [Complete] codon-table.11"]</p>                                                                                                                                                                                                                                                                                                                                                                                                                                                                                                                                                                                                              |
| <p>["cazy ASA24208.1 glycosidase [Paenibacillus donghaensis]",</p> <p>"cazy AYB43185.1 glycosidase [Paenibacillus lautus]",</p> <p>"cazy AYB44639.1 glycosidase [Paenibacillus lautus]",</p> <p>"cazylg 806915729 emb CQR58337.1  hypothetical protein PRIO_5968 [Paenibacillus riograndensis SBR5]",</p> <p>"cazylg 806911822 emb CQR54430.1  hypothetical protein PRIO_2021 [Paenibacillus riograndensis SBR5]",</p> <p>"cazylg 690619362 gb AIQ20575.1  glycosidase [Paenibacillus sp. FSL H7-0357]",</p> <p>"cazylg 686521741 gb AIQ32442.1  glycosidase [Paenibacillus sp. FSL P4-0081]",</p> <p>"cazylg 686533062 gb AIQ43761.1  glycosidase [Paenibacillus sp. FSL R5-0912]",</p> <p>"cazylg 686529476 gb AIQ40175.1  glycosidase [Paenibacillus sp. FSL R5-0912]",</p> <p>"cazylg 261283103 gb ACX65074.1  glycosidase PH1107-related protein [Paenibacillus sp. Y412MC10]",</p> <p>"cazylg 261284734 gb ACX66705.1  glycosidase PH1107-related protein [Paenibacillus sp. Y412MC10]"</p> |
| <p>["cazy AUS97932.1 glycosidase [Pseudoclostridium thermosuccinogenes]"</p>                                                                                                                                                                                                                                                                                                                                                                                                                                                                                                                                                                                                                                                                                                                                                                                                                                                                                                                      |
| <p>["humangut158499257-stool1_revised_scaffold31131_1_gene27031 strand:+ start:12494 stop:13561 length:1068 start_codon:yes stop_codon:yes gene_type:complete [Complete] codon-table.11",</p> <p>"mouseS-Fe10_GL0049071 [gene] locus=scaffold538_1:73033:74100:- [Complete] codon-table.11"]</p>                                                                                                                                                                                                                                                                                                                                                                                                                                                                                                                                                                                                                                                                                                  |
| <p>["humangut158499257-stool1_revised_scaffold31543_1_gene156346 strand:+ start:3549 stop:4652 length:1104 start_codon:yes stop_codon:yes gene_type:complete [Complete] codon-table.11"]</p>                                                                                                                                                                                                                                                                                                                                                                                                                                                                                                                                                                                                                                                                                                                                                                                                      |
| <p>["humangut158802708-stool2_revised_C1031219_1_gene117434 strand:- start:3 stop:800 length:798 start_codon:yes stop_codon:no gene_type:incomplete [Lack 3'-end] codon-table.11"]</p>                                                                                                                                                                                                                                                                                                                                                                                                                                                                                                                                                                                                                                                                                                                                                                                                            |
| <p>["humangut763678604-stool1_revised_scaffold30604_1_gene41349 strand:- start:315 stop:1211 length:897 start_codon:no stop_codon:yes gene_type:incomplete [Lack 5'-end] codon-table.11"]</p>                                                                                                                                                                                                                                                                                                                                                                                                                                                                                                                                                                                                                                                                                                                                                                                                     |
| <p>["humangut764588959-stool1_revised_scaffold16928_8_gene33966 strand:+ start:24161 stop:25240 length:1080 start_codon:yes stop_codon:yes gene_type:complete [Complete] codon-table.11"]</p>                                                                                                                                                                                                                                                                                                                                                                                                                                                                                                                                                                                                                                                                                                                                                                                                     |
| <p>["humangutMH0012_GL0093348 [gene] locus=scaffold132858_1:24919:25950:+ [Complete] codon-table.11"]</p>                                                                                                                                                                                                                                                                                                                                                                                                                                                                                                                                                                                                                                                                                                                                                                                                                                                                                         |
| <p>["humangutMH0014_GL0066051 [gene] locus=scaffold8330_2:4931:5965:+ [Complete] codon-table.11",</p> <p>"humangutMH0167_GL0006781 [gene] locus=scaffold31306_2:6878:7912:- [Complete] codon-table.11",</p> <p>"humangutMH0186_GL0027767 [gene] locus=scaffold38775_2:7237:8271:+ [Complete] codon-table.11",</p> <p>"rumen555_GL0572326_1 [gene] locus=scaffold127633_2:1897:2931:-[Lack 5'-end]"</p>                                                                                                                                                                                                                                                                                                                                                                                                                                                                                                                                                                                            |
| <p>["humangutMH0016_GL0053524 [gene] locus=scaffold46174_3:6312:7340:+ [Complete] codon-table.11",</p>                                                                                                                                                                                                                                                                                                                                                                                                                                                                                                                                                                                                                                                                                                                                                                                                                                                                                            |

|                                                                                                                                                                                                                                                                                                                      |
|----------------------------------------------------------------------------------------------------------------------------------------------------------------------------------------------------------------------------------------------------------------------------------------------------------------------|
| "humangutN074A_GL0059945 [gene] locus=scaffold56516_1:2:1030:+ [Lack 5'-end] codon-table.11",<br>"rumen2009040_GL2178254_1 [gene] locus=scaffold211162_3:3:1031:-[Complete]"                                                                                                                                         |
| ["humangutMH0023_GL0016923 [gene] locus=scaffold20961_1:12521:13549:- [Complete] codon-table.11",<br>"humangutMH0196_GL0001501 [gene] locus=scaffold26105_2:22792:23820:+ [Complete] codon-table.11",<br>"cazygii291513983[emb]CBK63193.1 Predicted glycosylase [Alistipes shahii WAL 8301]"                         |
| ["humangutMH0026_GL0052936 [gene] locus=scaffold3225_10:4730:5767:+ [Complete] codon-table.11",<br>"humangutT2D-97A_GL0086248 [gene] locus=scaffold47425_1:2:1039:+ [Lack 5'-end] codon-table.11",<br>"cazygii938475940[gb]ALJ40172.1 Beta-1", "4-mannooligosaccharide phosphorylase [Bacteroides thetaiotaomicron]" |
| ["humangutMH0045_GL0027487 [gene] locus=scaffold14473_8:8138:9163:- [Complete] codon-table.11",<br>"cazygii295085749[emb]CBK67272.1 Predicted glycosylase [Bacteroides xylanisolvens XB1A]"                                                                                                                          |
| ["humangutMH0062_GL0029872 [gene] locus=scaffold49596_2:9880:10911:- [Complete] codon-table.11",<br>"rumen553_GL0577581_1 [gene] locus=C7760091_1:2929:3960:+[Complete]",<br>"cazygii939202099[gb]ALJ60272.1 Beta-1", "4-mannooligosaccharide phosphorylase [Bacteroides cellulosilyticus]"                          |
| ["humangutMH0068_GL0060254 [gene] locus=scaffold43571_3:8486:9505:+ [Complete] codon-table.11",<br>"humangutMH0234_GL0052623 [gene] locus=scaffold5329_5:191:1210:- [Complete] codon-table.11",<br>"mouse1A-dyr3-06_GL0042287 [gene] locus=scaffold26745_1:53299:54318:+ [Complete] codon-table.11]"                 |
| ["humangutMH0069_GL0064711 [gene] locus=scaffold28096_1:118:1149:- [Lack 5'-end] codon-table.11"]                                                                                                                                                                                                                    |
| ["humangutMH0128_GL0088065 [gene] locus=scaffold20450_1:1792:2811:- [Complete] codon-table.11",<br>"humangutDOF006_GL0061826 [gene] locus=scaffold7860_1:16727:17746:- [Complete] codon-table.11"]                                                                                                                   |
| ["humangutMH0189_GL0032527 [gene] locus=scaffold51471_7:14022:15062:+ [Complete] codon-table.11"]                                                                                                                                                                                                                    |
| ["humangutMH0191_GL0020808 [gene] locus=scaffold58268_10:10061:11167:- [Complete] codon-table.11"]                                                                                                                                                                                                                   |
| ["humangutMH0206_GL0244042 [gene] locus=scaffold153070_2:2915:3943:- [Complete] codon-table.11"]                                                                                                                                                                                                                     |
| ["humangutMH0262_GL0038935 [gene] locus=scaffold67926_1:273:1313:- [Complete] codon-table.11"]                                                                                                                                                                                                                       |
| ["humangutMH0276_GL0064691 [gene] locus=scaffold2519_6:2502:3539:- [Complete] codon-table.11",<br>"humangutMH0286_GL0145651 [gene] locus=scaffold99187_1:38:1075:- [Complete] codon-table.11",<br>"pigPIG-046_GL0212765 [gene] locus=scaffold58095_1:17:1054:- [Complete] codon-table.11"]                           |
| ["humangutMH0281_GL0039814 [gene] locus=scaffold2190_4:46074:47090:- [Complete] codon-table.11"]                                                                                                                                                                                                                     |
| ["humangutMH0286_GL0002200 [gene] locus=scaffold119380_1:11409:12434:- [Complete] codon-table.11"]                                                                                                                                                                                                                   |
| ["humangutMH0318_GL0224344 [gene] locus=scaffold47629_5:244:1185:+ [Lack 3'-end] codon-table.11"]                                                                                                                                                                                                                    |
| ["humangutMH0322_GL0010496 [gene] locus=scaffold79063_1:1:531:- [Lack 3'-end] codon-table.11"]                                                                                                                                                                                                                       |
| ["humangutMH0366_GL0029491 [gene] locus=scaffold88536_2:269:724:- [Lack 5'-end] codon-table.11",<br>"pigPIG-046_GL0043927 [gene] locus=scaffold56558_5:1:456:+ [Lack 5'-end] codon-table.11"]                                                                                                                        |
| ["humangutMH0390_GL0070600 [gene] locus=scaffold139512_3:2139:3215:+ [Complete] codon-table.11"]                                                                                                                                                                                                                     |
| ["humangutMH0398_GL0157238 [gene] locus=scaffold47606_9:16412:17446:+ [Complete] codon-table.11"]                                                                                                                                                                                                                    |
| ["humangutMH0409_GL0198050 [gene] locus=scaffold8931_5:581:1291:+ [Lack 3'-end] codon-table.11"]                                                                                                                                                                                                                     |
| ["humangutMH0411_GL0047193 [gene] locus=scaffold1090_11:2:604:+ [Lack 5'-end] codon-table.11"]                                                                                                                                                                                                                       |
| ["humangutMH0411_GL0085735 [gene] locus=scaffold1090_10:8334:8768:+ [Lack 3'-end] codon-table.11"]                                                                                                                                                                                                                   |
| ["humangutMH0425_GL0001594 [gene] locus=scaffold95950_1:862:1893:+ [Complete] codon-table.11"]                                                                                                                                                                                                                       |
| ["humangutMH0426_GL0157669 [gene] locus=scaffold51080_3:210:1226:- [Complete] codon-table.11"]                                                                                                                                                                                                                       |
| ["humangutMH0447_GL0292365 [gene] locus=scaffold167208_1:1:678:- [Lack 3'-end] codon-table.11"]                                                                                                                                                                                                                      |
| ["humangutO2_UC13-1_GL0033296 [gene] locus=scaffold126607_3:2:688:- [Lack both ends] codon-table.11"]                                                                                                                                                                                                                |
| ["humangutT2D-112A_GL0012182 [gene] locus=scaffold16786_1:35354:36463:+ [Complete] codon-table.11"]                                                                                                                                                                                                                  |
| ["humangutT2D-6A_GL0067893 [gene] locus=scaffold43829_1:1:984:+ [Lack 5'-end] codon-table.11"]                                                                                                                                                                                                                       |

|                                                                                                                                                                                                                                                                                                                                                                                                                                                                                                                                                                                                                                                                                            |
|--------------------------------------------------------------------------------------------------------------------------------------------------------------------------------------------------------------------------------------------------------------------------------------------------------------------------------------------------------------------------------------------------------------------------------------------------------------------------------------------------------------------------------------------------------------------------------------------------------------------------------------------------------------------------------------------|
| ["humangutV1_CD6-0-PT_GL0047798 [gene] locus=scaffold26829_4:3:599:+ [Lack 5'-end] codon-table.11"]                                                                                                                                                                                                                                                                                                                                                                                                                                                                                                                                                                                        |
| ["humangutV1_CD6-0-PT_GL0078280 [gene] locus=scaffold26829_1:430:1455:+ [Complete] codon-table.11"]                                                                                                                                                                                                                                                                                                                                                                                                                                                                                                                                                                                        |
| ["humangutV1_FI05_GL0003190 [gene] locus=scaffold11689_19:3:956:- [Lack 3'-end] codon-table.11"]                                                                                                                                                                                                                                                                                                                                                                                                                                                                                                                                                                                           |
| ["humangutV1_UC4-5_GL0079869 [gene] locus=scaffold54277_5:2:556:+ [Lack 5'-end] codon-table.11"]                                                                                                                                                                                                                                                                                                                                                                                                                                                                                                                                                                                           |
| ["humangutV1_UC62-0_GL0063006 [gene] locus=scaffold33739_2:690:1724:+ [Complete] codon-table.11"]                                                                                                                                                                                                                                                                                                                                                                                                                                                                                                                                                                                          |
| ["mouseMC-6-4_GL0055591 [gene] locus=scaffold34577_1:209:820:+ [Lack 3'-end] codon-table.11"]                                                                                                                                                                                                                                                                                                                                                                                                                                                                                                                                                                                              |
| ["mouseMH-6-2_GL0037285 [gene] locus=scaffold25512_12:568:1497:- [Lack 5'-end] codon-table.11"]                                                                                                                                                                                                                                                                                                                                                                                                                                                                                                                                                                                            |
| ["pigPIG-012_GL0150297 [gene] locus=scaffold43096_1:9612:10637:- [Complete] codon-table.11",<br>"pigPIG-014_GL0174399 [gene] locus=scaffold158793_1:12263:13288:- [Complete] codon-table.11",<br>"rumen552_GL0927921_1 [gene] locus=scaffold1072884_1:3040:4065:+[Complete]",<br>"rumen554_GL0022084_1 [gene] locus=scaffold622384_2:2638:3663:+[Complete]",<br>"rumen555_GL1659128_1 [gene] locus=scaffold664035_1:394:1419:+[Complete]",<br>"rumen0081_GL1003999_1 [gene] locus=scaffold263265_2:1736:2761:-[Complete]",<br>"rumen0081_GL1905194_1 [gene] locus=scaffold790637_1:4621:5646:-[Complete]",<br>"rumen3042_GL0055097_1 [gene] locus=scaffold2449642_1:493:1518:-[Complete]"] |
| ["pigPIG-017_GL0116062 [gene] locus=C2023154_1:2:526:- [Lack both ends] codon-table.11",<br>"pigPIG-025_GL0042532 [gene] locus=scaffold3569_2:2:526:+ [Lack both ends] codon-table.11"]                                                                                                                                                                                                                                                                                                                                                                                                                                                                                                    |
| ["pigPIG-046_GL0008088 [gene] locus=scaffold56558_3:1:435:+ [Lack 5'-end] codon-table.11"]                                                                                                                                                                                                                                                                                                                                                                                                                                                                                                                                                                                                 |
| ["pigPIG-046_GL0021973 [gene] locus=scaffold56558_2:327:881:+ [Lack 3'-end] codon-table.11"]                                                                                                                                                                                                                                                                                                                                                                                                                                                                                                                                                                                               |
| ["pigPIG-046_GL0129164 [gene] locus=scaffold149693_1:2:772:- [Lack 5'-end] codon-table.11"]                                                                                                                                                                                                                                                                                                                                                                                                                                                                                                                                                                                                |
| ["pigPIG-046_GL0163660 [gene] locus=C1667800_1:3:611:- [Lack both ends] codon-table.11"]                                                                                                                                                                                                                                                                                                                                                                                                                                                                                                                                                                                                   |
| ["pigPIG-046_GL0237761 [gene] locus=scaffold20873_7:3:713:+ [Lack 5'-end] codon-table.11"]                                                                                                                                                                                                                                                                                                                                                                                                                                                                                                                                                                                                 |
| ["pigPIG_111_GL0029163 [gene] locus=scaffold123134_5:1:834:- [Lack 3'-end] codon-table.11"]                                                                                                                                                                                                                                                                                                                                                                                                                                                                                                                                                                                                |
| ["pigPIG_137_GL0081919 [gene] locus=scaffold5229_1:2:712:- [Lack 3'-end] codon-table.11"]                                                                                                                                                                                                                                                                                                                                                                                                                                                                                                                                                                                                  |
| ["rumen0081_GL0640070_1 [gene] locus=scaffold1031570_3:693:1742:-[Complete]"]                                                                                                                                                                                                                                                                                                                                                                                                                                                                                                                                                                                                              |
| ["rumen0081_GL1300067_1 [gene] locus=scaffold1981037_2:1:627:+[Lack both ends]"]                                                                                                                                                                                                                                                                                                                                                                                                                                                                                                                                                                                                           |
| ["rumen0081_GL1389475_1 [gene] locus=scaffold831809_1:66:554:+[Lack 3'-end]"]                                                                                                                                                                                                                                                                                                                                                                                                                                                                                                                                                                                                              |
| ["rumen0081_GL2024644_1 [gene] locus=scaffold558964_1:309:1061:-[Lack 5'-end]"]                                                                                                                                                                                                                                                                                                                                                                                                                                                                                                                                                                                                            |
| ["rumen0081_GL2142218_1 [gene] locus=scaffold29161_4:27306:28388:-[Complete]"]                                                                                                                                                                                                                                                                                                                                                                                                                                                                                                                                                                                                             |
| ["rumen100058_GL1011093_1 [gene] locus=scaffold2937549_1:3:809:-[Lack 3'-end]"]                                                                                                                                                                                                                                                                                                                                                                                                                                                                                                                                                                                                            |
| ["rumen100058_GL1148192_1 [gene] locus=scaffold1522361_1:1:534:+[Lack 5'-end]"]                                                                                                                                                                                                                                                                                                                                                                                                                                                                                                                                                                                                            |
| ["rumen2009040_GL0477798_1 [gene] locus=scaffold142321_4:1:597:-[Lack 3'-end]"]                                                                                                                                                                                                                                                                                                                                                                                                                                                                                                                                                                                                            |
| ["rumen2009040_GL1500910_1 [gene] locus=scaffold3043092_1:279:1289:+[Complete]"]                                                                                                                                                                                                                                                                                                                                                                                                                                                                                                                                                                                                           |
| ["rumen2009040_GL3126245_1 [gene] locus=C53776001_1:77:634:-[Lack 5'-end]"]                                                                                                                                                                                                                                                                                                                                                                                                                                                                                                                                                                                                                |
| ["rumen3042_GL0871115_1 [gene] locus=scaffold406494_2:1:516:-[Lack 3'-end]"]                                                                                                                                                                                                                                                                                                                                                                                                                                                                                                                                                                                                               |
| ["rumen3042_GL1840057_1 [gene] locus=scaffold1758679_3:2:655:-[Lack both ends]"]                                                                                                                                                                                                                                                                                                                                                                                                                                                                                                                                                                                                           |
| ["rumen3042_GL2361409_1 [gene] locus=scaffold2116171_1:3:611:-[Lack 3'-end]"]                                                                                                                                                                                                                                                                                                                                                                                                                                                                                                                                                                                                              |
| ["rumen552_GL0162218_1 [gene] locus=scaffold432661_1:3:788:-[Lack 3'-end]"]                                                                                                                                                                                                                                                                                                                                                                                                                                                                                                                                                                                                                |
| ["rumen552_GL0476189_1 [gene] locus=scaffold213780_1:1:897:+[Lack 5'-end]"]                                                                                                                                                                                                                                                                                                                                                                                                                                                                                                                                                                                                                |
| ["rumen552_GL0753098_1 [gene] locus=scaffold688634_2:18320:19339:+[Complete]"]                                                                                                                                                                                                                                                                                                                                                                                                                                                                                                                                                                                                             |
| ["rumen552_GL0997047_1 [gene] locus=scaffold330587_1:1:879:-[Lack 3'-end]"]                                                                                                                                                                                                                                                                                                                                                                                                                                                                                                                                                                                                                |
| ["rumen552_GL1413436_1 [gene] locus=scaffold293764_2:1333:2271:+[Lack 3'-end]"]                                                                                                                                                                                                                                                                                                                                                                                                                                                                                                                                                                                                            |
| ["rumen553_GL0808474_1 [gene] locus=scaffold355381_4:1012:2028:-[Complete]"]                                                                                                                                                                                                                                                                                                                                                                                                                                                                                                                                                                                                               |

|                                                                                                                                                                                                                                                                                                                          |
|--------------------------------------------------------------------------------------------------------------------------------------------------------------------------------------------------------------------------------------------------------------------------------------------------------------------------|
| "rumen3042_GL2824996_1 [gene] locus=scaffold1806622_7:857:1873:-[Complete]",<br>"rumen7049_GL2316902_1 [gene] locus=scaffold605401_1:140:1156:+[Complete]"                                                                                                                                                               |
| "rumen554_GL0341862_1 [gene] locus=scaffold1672451_1:12614:13660:-[Complete]"                                                                                                                                                                                                                                            |
| "rumen554_GL0890173_1 [gene] locus=scaffold267620_1:1509:2537:+[Complete]",<br>"rumen555_GL0416390_1 [gene] locus=scaffold471885_2:26470:27498:+[Complete]"                                                                                                                                                              |
| "rumen554_GL0946684_1 [gene] locus=scaffold2008995_1:103:585:+[Lack 3'-end]"                                                                                                                                                                                                                                             |
| "rumen554_GL1055110_1 [gene] locus=scaffold973006_3:451:1467:-[Complete]",<br>"rumen555_GL2016462_1 [gene] locus=scaffold1270480_2:4117:5133:+[Complete]",<br>"rumen7049_GL1493557_1 [gene] locus=scaffold105706_1:667:1683:-[Complete]"                                                                                 |
| "rumen554_GL1136972_1 [gene] locus=C40775586_1:283:903:-[Lack 5'-end]"                                                                                                                                                                                                                                                   |
| "rumen554_GL1319092_1 [gene] locus=scaffold382194_1:4652:5656:-[Complete]",<br>"rumen555_GL1209450_1 [gene] locus=scaffold278130_1:190:1194:-[Complete]",<br>"rumen3042_GL0887001_1 [gene] locus=scaffold982322_2:3140:4144:+[Complete]",<br>"rumen7049_GL0425070_1 [gene] locus=scaffold112622_1:1082:2086:-[Complete]" |
| "rumen554_GL1378425_1 [gene] locus=scaffold2137257_1:1055:1921:-[Lack 5'-end]"                                                                                                                                                                                                                                           |
| "rumen554_GL1682678_1 [gene] locus=scaffold2034588_1:179:931:+[Lack 3'-end]"                                                                                                                                                                                                                                             |
| "rumen554_GL2224399_1 [gene] locus=scaffold1392349_7:1614:2693:+[Complete]"                                                                                                                                                                                                                                              |
| "rumen554_GL2266656_1 [gene] locus=scaffold1961010_1:788:1279:+[Lack 3'-end]"                                                                                                                                                                                                                                            |
| "rumen554_GL2994839_1 [gene] locus=scaffold1195703_1:3:767:+[Lack 5'-end]"                                                                                                                                                                                                                                               |
| "rumen554_GL3008154_1 [gene] locus=scaffold1001714_5:1076:2137:+[Complete]"                                                                                                                                                                                                                                              |
| "rumen555_GL0339542_1 [gene] locus=scaffold437008_2:5979:7010:-[Complete]"                                                                                                                                                                                                                                               |
| "rumen555_GL0441372_1 [gene] locus=scaffold157828_1:2:742:-[Lack both ends]"                                                                                                                                                                                                                                             |
| "rumen555_GL1411799_1 [gene] locus=C27467200_1:3:569:-[Lack both ends]"                                                                                                                                                                                                                                                  |
| "rumen555_GL1554843_1 [gene] locus=scaffold136922_1:639:1346:-[Lack 5'-end]"                                                                                                                                                                                                                                             |
| "rumen555_GL2096312_1 [gene] locus=scaffold1400378_1:1:834:-[Lack both ends]"                                                                                                                                                                                                                                            |
| "rumen555_GL2224517_1 [gene] locus=C28442876_1:157:915:+[Lack 3'-end]"                                                                                                                                                                                                                                                   |
| "rumen583_GL0495572_1 [gene] locus=scaffold192603_1:15447:16469:-[Complete]",<br>"rumen554_GL2400409_1 [gene] locus=scaffold452350_2:1290:2312:-[Complete]"                                                                                                                                                              |
| "rumen7049_GL0211861_1 [gene] locus=scaffold851395_2:626:1399:-[Lack 5'-end]"                                                                                                                                                                                                                                            |
| "rumen7049_GL0530323_1 [gene] locus=scaffold895891_1:3:548:-[Lack 3'-end]"                                                                                                                                                                                                                                               |
| "rumen7049_GL1535513_1 [gene] locus=scaffold1811297_1:3:566:-[Lack 3'-end]"                                                                                                                                                                                                                                              |
| "rumen7049_GL2132576_1 [gene] locus=scaffold1972480_1:3:542:+[Lack both ends]"                                                                                                                                                                                                                                           |
| "rumen7049_GL2619815_1 [gene] locus=scaffold893286_1:1:639:-[Lack both ends]"                                                                                                                                                                                                                                            |

## C6

|                                                                                                                                                                                                                                                                                                                                                                                                                  |
|------------------------------------------------------------------------------------------------------------------------------------------------------------------------------------------------------------------------------------------------------------------------------------------------------------------------------------------------------------------------------------------------------------------|
| "Ncazy ANQ53725.1 glycosidase [Thermosiphon sp. 1070]",<br>"cazy APT72171.1 glycosidase [Thermosiphon sp. 1063]",<br>"cazy APT73767.1 glycosidase [Thermosiphon melanesiensis]",<br>"cazy APT76830.1 glycosidase [Marinitoga sp. 1137]",<br>"cazygi 372102538 gb AEX86442.1  putative glycosylase [Marinitoga piezophila KA3]",<br>"cazygi 217037868 gb ACJ76390.1  glycosylase [Thermosiphon africanus TCF52B]" |
| "cazy CCgi 166854664 gb ABY93073.1 β-1", "2-oligomannan phosphorylase_glycosidase", "PH1107-related [Thermoanaerobacter sp. X514]",<br>"cazygi 319930046 gb ADV80731.1  glycosidase related protein [Thermoanaerobacter brockii subsp. finni Ako-1]"                                                                                                                                                             |

|                                                                                                                                                                                                                                                                                                                                                                                                                                                                                                                                                                                                                                                                                                                                                                                                                                                                                                                                                                                                                                                                                                                                                                                                                                                                                                                                                                                                                                                                                                                                                                                                                                                                             |
|-----------------------------------------------------------------------------------------------------------------------------------------------------------------------------------------------------------------------------------------------------------------------------------------------------------------------------------------------------------------------------------------------------------------------------------------------------------------------------------------------------------------------------------------------------------------------------------------------------------------------------------------------------------------------------------------------------------------------------------------------------------------------------------------------------------------------------------------------------------------------------------------------------------------------------------------------------------------------------------------------------------------------------------------------------------------------------------------------------------------------------------------------------------------------------------------------------------------------------------------------------------------------------------------------------------------------------------------------------------------------------------------------------------------------------------------------------------------------------------------------------------------------------------------------------------------------------------------------------------------------------------------------------------------------------|
| <p>"cazygi 694165108 gb AIS51279.1  beta-1", "4-manno oligosaccharide phosphorylase [Thermoanaerobacter kivui]",</p> <p>"cazygi 166857394 gb ABY95802.1  glycosidase", " PH1107-related [Thermoanaerobacter pseudethanolicus ATCC 33223]",</p> <p>"cazygi 307580336 gb ADN53735.1  glycosidase related protein [Thermoanaerobacter sp. X513]",</p> <p>"cazygi 344031860 gb AEM77586.1  glycosidase related protein [Thermoanaerobacter wiegellii Rf8.B1]"</p>                                                                                                                                                                                                                                                                                                                                                                                                                                                                                                                                                                                                                                                                                                                                                                                                                                                                                                                                                                                                                                                                                                                                                                                                               |
| <p>["cazyCCgij 166854665 gb ABY93074.1 β-1", "2-mannobiose phosphorylase_glycosidase", " PH1107-related [Thermoanaerobacter sp. X514]",</p> <p>"cazy AST56542.1  glycosidase [Thermoanaerobacterium thermosaccharolyticum]",</p> <p>"cazygi 20515037 gb AAM23369.1  predicted glycosylase [Caldanaerobacter subterraneus subsp. tengcongensis MB4]",</p> <p>"cazygi 319930047 gb ADV80732.1  glycosidase related protein [Thermoanaerobacter brockii subsp. finni Ako-1]",</p> <p>"cazygi 289527030 gb ADD01382.1  glycosidase PH1107-related protein [Thermoanaerobacter italicus Ab9]",</p> <p>"cazygi 694165107 gb AIS51278.1  beta-1", "4-manno oligosaccharide phosphorylase [Thermoanaerobacter kivui]",</p> <p>"cazygi 296841381 gb ADH59897.1  glycosidase related protein [Thermoanaerobacter mathranii subsp. mathranii str. A3]",</p> <p>"cazygi 166857395 gb ABY95803.1  glycosidase", " PH1107-related [Thermoanaerobacter pseudethanolicus ATCC 33223]",</p> <p>"cazygi 307580335 gb ADN53734.1  glycosidase related protein [Thermoanaerobacter sp. X513]",</p> <p>"cazygi 344031859 gb AEM77585.1  glycosidase related protein [Thermoanaerobacter wiegellii Rf8.B1]",</p> <p>"cazygi 389570918 gb AFK87323.1  glycosidase related protein [Thermoanaerobacterium saccharolyticum JW/SL-YS485]",</p> <p>"cazygi 302778855 gb ADL69414.1  glycosidase-related [Thermoanaerobacterium thermosaccharolyticum DSM 571]",</p> <p>"cazygi 43293724 gb AGB19546.1  putative glycosylase [Thermoanaerobacterium thermosaccharolyticum M0795]",</p> <p>"cazygi 333112032 gb AEF16969.1  glycosidase related protein [Thermoanaerobacterium xylanolyticum LX-11]"</p> |
| <p>["cazygi 1015666959 gb AMW33320.1  glycosidase [Fervidobacterium islandicum]",</p> <p>"cazygi 383110225 gb AFG35828.1  putative glycosylase [Fervidobacterium pennivorans DSM 9078]",</p> <p>"cazygi 1028458645 gb ANE41578.1  glycosidase [Fervidobacterium pennivorans]",</p> <p>"cazygi 4982436 gb AAD36914.1 AE001822_7 conserved hypothetical protein [Thermotoga maritima MSB8]",</p> <p>"cazygi 811643070 gb AKE31479.1  glycosidase [Thermotoga maritima]",</p> <p>"cazygi 811631134 gb AKE27733.1  glycosidase [Thermotoga maritima]",</p> <p>"cazygi 281373141 gb ADA66703.1  glycosidase PH1107-related protein [Thermotoga naphthophila RKU-10]",</p> <p>"cazygi 147735625 gb ABQ46965.1  glycosidase", " PH1107-related [Thermotoga petrophila RKU-1]",</p> <p>"cazygi 728865343 gb AIY86523.1  glycosidase PH1107-related protein [Thermotoga sp. 2812B]",</p> <p>"cazygi 728867102 gb AIY88281.1  glycosidase PH1107-related protein [Thermotoga sp. Cell2]",</p> <p>"cazygi 170176262 gb ACB09314.1  glycosidase PH1107-related [Thermotoga sp. RQ2]",</p> <p>"cazygi 752580369 gb AJG40882.1  glycosidase [Thermotoga sp. RQ7]"</p>                                                                                                                                                                                                                                                                                                                                                                                                                                                                                                                     |
| <p>["cazygi 1028461733 gb ANE44663.1  glycosidase [Deinococcus puniceus]"</p>                                                                                                                                                                                                                                                                                                                                                                                                                                                                                                                                                                                                                                                                                                                                                                                                                                                                                                                                                                                                                                                                                                                                                                                                                                                                                                                                                                                                                                                                                                                                                                                               |
| <p>["cazygi 166854675 gb ABY93084.1  glycosidase", " PH1107-related [Thermoanaerobacter sp. X514]"</p>                                                                                                                                                                                                                                                                                                                                                                                                                                                                                                                                                                                                                                                                                                                                                                                                                                                                                                                                                                                                                                                                                                                                                                                                                                                                                                                                                                                                                                                                                                                                                                      |
| <p>["cazygi 20515038 gb AAM23370.1  predicted glycosylase [Caldanaerobacter subterraneus subsp. tengcongensis MB4]"</p>                                                                                                                                                                                                                                                                                                                                                                                                                                                                                                                                                                                                                                                                                                                                                                                                                                                                                                                                                                                                                                                                                                                                                                                                                                                                                                                                                                                                                                                                                                                                                     |
| <p>["cazygi 221572151 gb ACM22963.1  Glycosidase [Thermotoga neapolitana DSM 4359]"</p>                                                                                                                                                                                                                                                                                                                                                                                                                                                                                                                                                                                                                                                                                                                                                                                                                                                                                                                                                                                                                                                                                                                                                                                                                                                                                                                                                                                                                                                                                                                                                                                     |
| <p>["cazygi 222455400 gb ACM59662.1  glycosidase PH1107-related [Caldicellulosiruptor besicii DSM 6725]",</p> <p>"cazygi 311778340 gb ADQ07826.1  glycosidase related protein [Caldicellulosiruptor hydrothermalis 108]",</p> <p>"cazygi 311778489 gb ADQ07975.1  glycosidase related protein [Caldicellulosiruptor hydrothermalis 108]",</p> <p>"cazygi 312179921 gb ADQ40091.1  glycosidase related protein [Caldicellulosiruptor kristjanssonii I77R1B]",</p> <p>"cazygi 312203613 gb ADQ46940.1  glycosidase related protein [Caldicellulosiruptor kronotskyensis 2002]",</p> <p>"cazygi 302574013 gb ADL41804.1  glycosidase related protein [Caldicellulosiruptor obsidiensis OB47]",</p> <p>"cazygi 311774490 gb ADQ03977.1  glycosidase related protein [Caldicellulosiruptor owensensis OL]",</p> <p>"cazygi 145408902 gb ABP65906.1  glycosidase", " PH1107-related protein [Caldicellulosiruptor saccharolyticus DSM 8903]",</p> <p>"cazygi 145409377 gb ABP66381.1  glycosidase",</p> <p>"cazygi 332698671 gb AEE95612.1  glycosidase related protein [Mahella australiensis 50-1 BON]"</p>                                                                                                                                                                                                                                                                                                                                                                                                                                                                                                                                                                     |

|                                                                                                                                                                                                                                                                                                                                                                                                                                                                                                                                                                                                                                                                                                 |
|-------------------------------------------------------------------------------------------------------------------------------------------------------------------------------------------------------------------------------------------------------------------------------------------------------------------------------------------------------------------------------------------------------------------------------------------------------------------------------------------------------------------------------------------------------------------------------------------------------------------------------------------------------------------------------------------------|
| <p>["cazygi 239505941 gb ACR79428.1  glycosidase PH1107-related [Kosmotoga olearia TBF 19.5.1]",</p> <p>"cazygi 827412316 gb AKI96868.1  glycosidase [Kosmotoga pacifica]",</p> <p>"cazygi 744796242 gb AJC73818.1  glycosidase [Pseudothermotoga hypogea DSM 11164 = NBRC 106472]",</p> <p>"cazygi 157314496 gb ABV33595.1  glycosidase PH1107-related [Pseudothermotoga lettingae TMO]",</p> <p>"cazygi 149793179 gb ABR30627.1  glycosidase", " PH1107-related [Thermosipho melanesiensis BI429]"</p>                                                                                                                                                                                        |
| <p>["cazygi 268323645 emb CBH37233.1  conserved hypothetical protein",</p> <p>" DUF377 family [uncultured archaeon]",</p> <p>"cazygi 268324206 emb CBH37794.1  conserved hypothetical protein",</p> <p>"cazygi 268323527 emb CBH37115.1  conserved hypothetical protein"]</p>                                                                                                                                                                                                                                                                                                                                                                                                                   |
| <p>["cazygi 289527031 gb ADD01383.1  glycosidase PH1107-related protein [Thermoanaerobacter italicus Ab9]",</p> <p>"cazygi 296841382 gb ADH59898.1  glycosidase related protein [Thermoanaerobacter mathranii subsp. mathranii str. A3]"</p>                                                                                                                                                                                                                                                                                                                                                                                                                                                    |
| <p>["cazygi 297165231 gb AD14942.1  glycosidase-related protein [Truepera radiovictrix DSM 17093]"</p>                                                                                                                                                                                                                                                                                                                                                                                                                                                                                                                                                                                          |
| <p>["cazygi 311778490 gb ADQ07976.1  glycosidase related protein [Caldicellulosiruptor hydrothermalis 108]",</p> <p>"cazygi 145408901 gb ABP65905.1  glycosidase", " PH1107-related protein [Caldicellulosiruptor saccharolyticus DSM 8903]"</p>                                                                                                                                                                                                                                                                                                                                                                                                                                                |
| <p>["cazygi 319995140 dbj BAJ6391.1.1  hypothetical protein ANT_18850 [Anaerolinea thermophila UNI-1]"</p>                                                                                                                                                                                                                                                                                                                                                                                                                                                                                                                                                                                      |
| <p>["cazygi 328450346 gb AEB11247.1  glycosidase related protein [Marinithermus hydrothermalis DSM 14884]"</p>                                                                                                                                                                                                                                                                                                                                                                                                                                                                                                                                                                                  |
| <p>["cazygi 343965244 gb AEM74391.1  glycosidase related protein [Caldicellulosiruptor lactoaceticus 6A]"</p>                                                                                                                                                                                                                                                                                                                                                                                                                                                                                                                                                                                   |
| <p>["cazygi 381383208 dbj BAM00025.1  hypothetical protein CLDAP_19850 [Caldilinea aerophila DSM 14535 = NBRC 104270]"</p>                                                                                                                                                                                                                                                                                                                                                                                                                                                                                                                                                                      |
| <p>["cazygi 383110168 gb AFG35771.1  putative glycosylase [Fervidobacterium pennivorans DSM 9078]",</p> <p>"cazygi 827412798 gb AKI97350.1  glycosidase [Kosmotoga pacifica]",</p> <p>"cazygi 335365667 gb AEH51612.1  glycosidase related protein [Pseudothermotoga thermanum DSM 5069]"</p>                                                                                                                                                                                                                                                                                                                                                                                                   |
| <p>["cazygi 51856141 dbj BAD40299.1  glycosylase [Symbiobacterium thermophilum IAM 14863]"</p>                                                                                                                                                                                                                                                                                                                                                                                                                                                                                                                                                                                                  |
| <p>["cazygi 51856142 dbj BAD40300.1  glycosylase [Symbiobacterium thermophilum IAM 14863]"</p>                                                                                                                                                                                                                                                                                                                                                                                                                                                                                                                                                                                                  |
| <p>["cazygi 762220183 emb CEP78012.1  putative glycosylase [Defluviitoga tunisiensis]"</p>                                                                                                                                                                                                                                                                                                                                                                                                                                                                                                                                                                                                      |
| <p>["cazy AST56541.1  glycosidase [Thermoanaerobacterium thermosaccharolyticum]",</p> <p>"cazy SNX53831.1  Predicted glycosyl hydrolase",</p> <p>" GH43/DUF377 family [Thermoanaerobacterium sp. RBITD]",</p> <p>"cazygi 389570917 gb AFK87322.1  glycosidase related protein [Thermoanaerobacterium saccharolyticum JW/SL-YS485]",</p> <p>"cazygi 302778854 gb ADL69413.1  glycosidase-related [Thermoanaerobacterium thermosaccharolyticum DSM 571]",</p> <p>"cazygi 433293723 gb AGB19545.1  putative glycosylase [Thermoanaerobacterium thermosaccharolyticum M0795]",</p> <p>"cazygi 333112033 gb AEF16970.1  glycosidase related protein [Thermoanaerobacterium xylanolyticum LX-11]"</p> |
| <p>["cazy ATY84875.1  glycosidase [Kyrpidia spormannii]",</p> <p>"cazygi 295411899 gb ADG06391.1  glycosidase PH1107-related protein [Kyrpidia tusciae DSM 2912]"</p>                                                                                                                                                                                                                                                                                                                                                                                                                                                                                                                           |
| <p>["cazy SSC12642.1  Glycosidase related protein [Mesotoga infera]",</p> <p>"cazygi 387859461 gb AFK07552.1  putative glycosylase [Mesotoga prima MesG1.Ag.4.2]"</p>                                                                                                                                                                                                                                                                                                                                                                                                                                                                                                                           |
| <p>["humangutMH0143_GL0072439 [gene] locus=scaffold109036_3:3:515:+ [Lack both ends] codon-table.11"]</p>                                                                                                                                                                                                                                                                                                                                                                                                                                                                                                                                                                                       |
| <p>["humangutO2_UC58-0_GL0085426 [gene] locus=scaffold117881_8:2:955:+ [Lack 5'-end] codon-table.11"]</p>                                                                                                                                                                                                                                                                                                                                                                                                                                                                                                                                                                                       |

## UC1

|                                                                                                                                                                                                           |
|-----------------------------------------------------------------------------------------------------------------------------------------------------------------------------------------------------------|
| <p>["cazygi 1049185275 gb ANY05114.1  glycosidase [Pseudonocardia sp. HH130630-07]"</p>                                                                                                                   |
| <p>["cazygi 378568459 gb AFC28769.1  glycosidase PH1107-like protein [Paenibacillus mucilaginosus 3016]"</p>                                                                                              |
| <p>["cazygi 384089509 gb AFH60945.1  glycosidase [Paenibacillus mucilaginosus K02]",</p> <p>"cazygi 336297017 gb AEI40120.1  glycosidase PH1107-related protein [Paenibacillus mucilaginosus KNP414]"</p> |



|                                                                                                                                                                                                                                                                                                                                                                                                                                                                                                                                                                                                                                                                                                                            |
|----------------------------------------------------------------------------------------------------------------------------------------------------------------------------------------------------------------------------------------------------------------------------------------------------------------------------------------------------------------------------------------------------------------------------------------------------------------------------------------------------------------------------------------------------------------------------------------------------------------------------------------------------------------------------------------------------------------------------|
| ["cazygi 573473777 gb AHF90788.1  glycosidase [Opitutaceae bacterium TAV5]"]                                                                                                                                                                                                                                                                                                                                                                                                                                                                                                                                                                                                                                               |
| ["cazygi 686546439 gb AIQ57135.1  glycosidase [Paenibacillus borealis]"]                                                                                                                                                                                                                                                                                                                                                                                                                                                                                                                                                                                                                                                   |
| ["cazygi 686546447 gb AIQ57143.1  glycosidase [Paenibacillus borealis]"]                                                                                                                                                                                                                                                                                                                                                                                                                                                                                                                                                                                                                                                   |
| ["cazygi 686557089 gb AIQ67783.1  glycosidase [Paenibacillus graminis]",<br>"cazygi 806911715 emb CQR54323.1  glycosidase PH1107-like protein [Paenibacillus riograndensis SBR5]",<br>"cazygi 690615589 gb AIQ16802.1  glycosidase [Paenibacillus sp. FSL H7-0357]",<br>"cazygi 686529396 gb AIQ40095.1  glycosidase [Paenibacillus sp. FSL R5-0912]",<br>"cazygi 686535254 gb AIQ45952.1  glycosidase [Paenibacillus sp. FSL R7-0273]"]                                                                                                                                                                                                                                                                                   |
| ["cazygi 744796135 gb AJC73711.1  glycosidase [Pseudothromotoga hypogea DSM 11164 = NBRC 106472]"]                                                                                                                                                                                                                                                                                                                                                                                                                                                                                                                                                                                                                         |
| ["cazygi 806913148 emb CQR55756.1  glycosidase PH1107-like protein [Paenibacillus riograndensis SBR5]"]                                                                                                                                                                                                                                                                                                                                                                                                                                                                                                                                                                                                                    |
| ["cazygi 921143607 dbj BAS26693.1  glycosidase [Limnochorda pilosa]"]                                                                                                                                                                                                                                                                                                                                                                                                                                                                                                                                                                                                                                                      |
| ["cazy AVM43645.1 glycosidase [Victivallales bacterium CCUG 44730]"]                                                                                                                                                                                                                                                                                                                                                                                                                                                                                                                                                                                                                                                       |
| ["cazy AVM43672.1 glycosidase [Victivallales bacterium CCUG 44730]"]                                                                                                                                                                                                                                                                                                                                                                                                                                                                                                                                                                                                                                                       |
| ["cazy AWV34616.1 glycosidase [Paenibacillus odorifer]",<br>"cazygi 686558155 gb AIQ68849.1  glycosidase [Paenibacillus graminis]",<br>"cazygi 686564617 gb AIQ75310.1  glycosidase [Paenibacillus odorifer]",<br>"cazygi 686517487 gb AIQ28188.1  glycosidase [Paenibacillus sp. FSL P4-0081]",<br>"cazygi 686519867 gb AIQ30568.1  glycosidase [Paenibacillus sp. FSL P4-0081]",<br>"cazygi 686517655 gb AIQ28356.1  glycosidase [Paenibacillus sp. FSL P4-0081]",<br>"cazygi 686529388 gb AIQ40087.1  glycosidase [Paenibacillus sp. FSL R5-0912]",<br>"cazygi 686537901 gb AIQ48599.1  glycosidase [Paenibacillus sp. FSL R7-0273]",<br>"cazygi 686543388 gb AIQ54085.1  glycosidase [Paenibacillus sp. FSL R7-0331]"] |
| ["cazy AYB44207.1 glycosidase [Paenibacillus lautus]",<br>"cazygi 806911723 emb CQR54331.1  glycosidase PH1107-like protein [Paenibacillus riograndensis SBR5]",<br>"cazygi 261283676 gb ACX65647.1  glycosidase PH1107-related protein [Paenibacillus sp. Y412MC10]"]                                                                                                                                                                                                                                                                                                                                                                                                                                                     |
| ["cazy SDR97174.1 beta-1", "4-mannooligosaccharide/beta-1", "4-mannosyl-N-acetylglucosamine phosphorylase [Microlunatus soli]"]                                                                                                                                                                                                                                                                                                                                                                                                                                                                                                                                                                                            |
| ["cazy SDU29472.1 beta-1", "4-mannooligosaccharide/beta-1", "4-mannosyl-N-acetylglucosamine phosphorylase [Verrucomicrobium sp. GAS474]"]                                                                                                                                                                                                                                                                                                                                                                                                                                                                                                                                                                                  |
| ["humangut158499257-stool2_revised_C1311791_1_gene93858 strand:+ start:3 stop:749 length:747 start_codon:no stop_codon:yes gene_type:incomplete [Lack 5'-end] codon-table.11"]                                                                                                                                                                                                                                                                                                                                                                                                                                                                                                                                             |
| ["humangut159551223-stool1_revised_scaffold42234_1_gene163963 strand:- start:1 stop:783 length:783 start_codon:yes stop_codon:no gene_type:incomplete [Lack 3'-end] codon-table.11"]                                                                                                                                                                                                                                                                                                                                                                                                                                                                                                                                       |
| ["humangut159551223-stool1_revised_scaffold43769_1_gene35004 strand:- start:2 stop:508 length:507 start_codon:yes stop_codon:no gene_type:incomplete [Lack 3'-end] codon-table.11"]                                                                                                                                                                                                                                                                                                                                                                                                                                                                                                                                        |
| ["humangut159571453-stool2_revised_C1054305_1_gene27241 strand:+ start:3 stop:392 length:390 start_codon:no stop_codon:yes gene_type:incomplete [Lack 5'-end] codon-table.11"]                                                                                                                                                                                                                                                                                                                                                                                                                                                                                                                                             |
| ["humangut160582958-stool1_revised_C631198_1_gene91844 strand:+ start:508 stop:1035 length:528 start_codon:yes stop_codon:no gene_type:incomplete [Lack 3'-end] codon-table.11"]                                                                                                                                                                                                                                                                                                                                                                                                                                                                                                                                           |
| ["humangut340101.Vvad_PD3034 [Complete]:- codon-table.11",<br>"pigPIG-011_GL0202905 [gene] locus=C1978068_1:308:1303:+ [Complete] codon-table.11"]                                                                                                                                                                                                                                                                                                                                                                                                                                                                                                                                                                         |
| ["humangut763860675-stool1_revised_scaffold25687_1_gene80256 strand:- start:3158 stop:4159 length:1002 start_codon:yes stop_codon:yes gene_type:complete [Complete] codon-table.11"]                                                                                                                                                                                                                                                                                                                                                                                                                                                                                                                                       |
| ["humangutMH0063_GL0054584 [gene] locus=scaffold27192_5:1012:2076:+ [Complete] codon-table.11"]                                                                                                                                                                                                                                                                                                                                                                                                                                                                                                                                                                                                                            |
| ["humangutMH0096_GL0011911 [gene] locus=scaffold104643_2:2039:3028:+ [Complete] codon-table.11",                                                                                                                                                                                                                                                                                                                                                                                                                                                                                                                                                                                                                           |

|                                                                                                                                                                                                                                                                                                                                                                                                                                                                                                                                    |
|------------------------------------------------------------------------------------------------------------------------------------------------------------------------------------------------------------------------------------------------------------------------------------------------------------------------------------------------------------------------------------------------------------------------------------------------------------------------------------------------------------------------------------|
| "pigPIG-017_GL0234446 [gene] locus=scaffold149736_5:550:1539:+ [Complete] codon-table.11"                                                                                                                                                                                                                                                                                                                                                                                                                                          |
| ["humangutMH0189_GL0133064 [gene] locus=scaffold92118_1:2232:3311:+ [Complete] codon-table.11",<br>"pigPIG-076_GL0239818 [gene] locus=scaffold157416_2:386:1465:+ [Complete] codon-table.11"]                                                                                                                                                                                                                                                                                                                                      |
| ["humangutMH0262_GL0124216 [gene] locus=scaffold29483_4:518:1501:+ [Complete] codon-table.11",<br>"pigBHZ-10B_GL0265814 [gene] locus=scaffold53263_4:624:1607:- [Complete] codon-table.11",<br>"rumen100058_GL1687178_1 [gene] locus=scaffold1731614_5:2129:3112:+[Complete]",<br>"rumen100058_GL2709543_1 [gene] locus=scaffold1462025_2:340:1323:-[Complete]",<br>"rumen100058_GL2832159_1 [gene] locus=scaffold1857139_1:412:1395:+[Complete]",<br>"rumen7049_GL2266359_1 [gene] locus=scaffold1768654_1:359:1342:+[Complete]"] |
| ["humangutMH0280_GL0194891 [gene] locus=scaffold22230_3:105:1103:+ [Complete] codon-table.11",<br>"humangut158802708-stool2_revised_C1062115_1_gene170068 strand:+ start:241 stop:1239 length:999 start_codon:yes stop_codon:yes gene_type:complete [Complete] codon-table.11",<br>"pigPIG-011_GL0096946 [gene] locus=scaffold34023_2:73773:74771:+ [Complete] codon-table.11"]                                                                                                                                                    |
| ["humangutMH0303_GL0047987 [gene] locus=scaffold24795_3:211:909:+ [Lack 3'-end] codon-table.11"]                                                                                                                                                                                                                                                                                                                                                                                                                                   |
| ["humangutMH0389_GL0081058 [gene] locus=scaffold47280_7:3:599:+ [Lack 5'-end] codon-table.11"]                                                                                                                                                                                                                                                                                                                                                                                                                                     |
| ["humangutMH0409_GL0033903 [gene] locus=scaffold90767_2:1:387:- [Lack 3'-end] codon-table.11"]                                                                                                                                                                                                                                                                                                                                                                                                                                     |
| ["humangutMH0415_GL0280858 [gene] locus=scaffold113323_4:1038:1616:+ [Lack 3'-end] codon-table.11"]                                                                                                                                                                                                                                                                                                                                                                                                                                |
| ["humangutMH0426_GL0152356 [gene] locus=scaffold70372_3:1641:2387:- [Lack 5'-end] codon-table.11"]                                                                                                                                                                                                                                                                                                                                                                                                                                 |
| ["humangutMH0431_GL0150624 [gene] locus=scaffold48508_1:162:1193:- [Complete] codon-table.11"]                                                                                                                                                                                                                                                                                                                                                                                                                                     |
| ["humangutMH0454_GL0218883 [gene] locus=scaffold32134_2:3:905:- [Lack 3'-end] codon-table.11"]                                                                                                                                                                                                                                                                                                                                                                                                                                     |
| ["humangutO2_UC18-0_GL0002941 [gene] locus=scaffold24479_5:1130:2125:- [Complete] codon-table.11"]                                                                                                                                                                                                                                                                                                                                                                                                                                 |
| ["humangutO2_UC40-1_GL0043667 [gene] locus=scaffold113353_5:526:1038:- [Lack 5'-end] codon-table.11"]                                                                                                                                                                                                                                                                                                                                                                                                                              |
| ["humangutO2_UC40-1_GL0211370 [gene] locus=scaffold74444_2:21712:22695:+ [Complete] codon-table.11"]                                                                                                                                                                                                                                                                                                                                                                                                                               |
| ["humangutO2_UC58-0_GL0099960 [gene] locus=scaffold95984_2:683:1207:+ [Lack 3'-end] codon-table.11"]                                                                                                                                                                                                                                                                                                                                                                                                                               |
| ["humangutO2_UC58-0_GL0154017 [gene] locus=scaffold92913_2:3:416:- [Lack 3'-end] codon-table.11"]                                                                                                                                                                                                                                                                                                                                                                                                                                  |
| ["humangutT2D-51A_GL0099954 [gene] locus=scaffold9328_6:1:771:+ [Lack 5'-end] codon-table.11"]                                                                                                                                                                                                                                                                                                                                                                                                                                     |
| ["humangutV1_F114_GL0166326 [gene] locus=scaffold97924_1:2254:3243:+ [Complete] codon-table.11"]                                                                                                                                                                                                                                                                                                                                                                                                                                   |
| ["humangutV1_F114_GL0201044 [gene] locus=scaffold65910_3:536:1390:+ [Lack 3'-end] codon-table.11"]                                                                                                                                                                                                                                                                                                                                                                                                                                 |
| ["humangutV1_F117_GL0038393 [gene] locus=scaffold56763_3:349:1350:- [Complete] codon-table.11"]                                                                                                                                                                                                                                                                                                                                                                                                                                    |
| ["humangutV1_UC14-1_GL0099520 [gene] locus=scaffold18051_3:9664:10695:+ [Complete] codon-table.11"]                                                                                                                                                                                                                                                                                                                                                                                                                                |
| ["humangutV1_UC52-0_GL0119016 [gene] locus=scaffold45779_2:3:503:- [Lack both ends] codon-table.11"]                                                                                                                                                                                                                                                                                                                                                                                                                               |
| ["mouse29_GL0012345 [gene] locus=scaffold12062_11:1021:2025:- [Complete] codon-table.11"]                                                                                                                                                                                                                                                                                                                                                                                                                                          |
| ["pigBHZ-7B_GL0080054 [gene] locus=scaffold142141_1:1:720:+ [Lack 5'-end] codon-table.11"]                                                                                                                                                                                                                                                                                                                                                                                                                                         |
| ["pigBMZ-17B_GL0166977 [gene] locus=scaffold88433_2:1:525:+ [Lack 5'-end] codon-table.11"]                                                                                                                                                                                                                                                                                                                                                                                                                                         |
| ["pigDB-512B_GL0166967 [gene] locus=scaffold65887_2:3:632:+ [Lack both ends] codon-table.11"]                                                                                                                                                                                                                                                                                                                                                                                                                                      |
| ["pigEYZ-120B_GL0131454 [gene] locus=scaffold14870_3:1:462:+ [Lack 5'-end] codon-table.11"]                                                                                                                                                                                                                                                                                                                                                                                                                                        |
| ["pigPIG-004_GL0134140 [gene] locus=scaffold53576_2:1903:2481:+ [Lack 3'-end] codon-table.11"]                                                                                                                                                                                                                                                                                                                                                                                                                                     |
| ["pigPIG-008_GL0185116 [gene] locus=scaffold9783_10:4216:5184:+ [Complete] codon-table.11"]                                                                                                                                                                                                                                                                                                                                                                                                                                        |
| ["pigPIG-012_GL0060903 [gene] locus=scaffold150081_3:1065:1895:+ [Lack 3'-end] codon-table.11"]                                                                                                                                                                                                                                                                                                                                                                                                                                    |
| ["pigPIG-014_GL0106503 [gene] locus=scaffold105721_2:220:1296:+ [Complete] codon-table.11"]                                                                                                                                                                                                                                                                                                                                                                                                                                        |
| ["pigPIG-026_GL0093671 [gene] locus=scaffold175883_1:10384:11400:+ [Complete] codon-table.11"]                                                                                                                                                                                                                                                                                                                                                                                                                                     |
| ["pigPIG-027_GL0244087 [gene] locus=scaffold114785_1:1:678:- [Lack 3'-end] codon-table.11"]                                                                                                                                                                                                                                                                                                                                                                                                                                        |
| ["pigPIG-031_GL0171674 [gene] locus=scaffold97864_2:29:1135:- [Lack 5'-end] codon-table.11"]                                                                                                                                                                                                                                                                                                                                                                                                                                       |

|                                                                                                                                                                                                                                                       |
|-------------------------------------------------------------------------------------------------------------------------------------------------------------------------------------------------------------------------------------------------------|
| ["pigPIG-037_GL0047500 [gene] locus=scaffold88886_2:1:936:+ [Lack 5'-end] codon-table.11"]                                                                                                                                                            |
| ["pigPIG-091_GL0066511 [gene] locus=scaffold155169_1:5965:6960:+ [Complete] codon-table.11"]                                                                                                                                                          |
| ["pigPIG-123_GL0179481 [gene] locus=scaffold109245_2:3:665:+ [Lack both ends] codon-table.11"]                                                                                                                                                        |
| ["pigSYZ-426B_GL0182759 [gene] locus=scaffold167211_1:3:542:+ [Lack both ends] codon-table.11"]                                                                                                                                                       |
| ["pigSYZ-441B_GL0127622 [gene] locus=scaffold100124_1:2:562:+ [Lack both ends] codon-table.11"]                                                                                                                                                       |
| ["pigZXZ-3B_GL0023913 [gene] locus=scaffold94759_2:1:606:- [Lack 3'-end] codon-table.11"]                                                                                                                                                             |
| ["pigZXZ-8B_GL0155172 [gene] locus=scaffold121846_4:3:635:- [Lack both ends] codon-table.11"]                                                                                                                                                         |
| ["pigZXZ-8B_GL0175471 [gene] locus=scaffold148983_2:2:424:- [Lack 3'-end] codon-table.11"]                                                                                                                                                            |
| ["rumen0081_GL0148410_1 [gene] locus=scaffold391561_1:1:657:+[Lack both ends"]                                                                                                                                                                        |
| ["rumen0081_GL0415391_1 [gene] locus=scaffold1981889_2:1:516:-[Lack 3'-end"]                                                                                                                                                                          |
| ["rumen0081_GL0880584_1 [gene] locus=scaffold1025676_4:1:582:-[Lack both ends"]                                                                                                                                                                       |
| ["rumen0081_GL0914779_1 [gene] locus=scaffold559002_3:2076:3092:-[Complete]"]                                                                                                                                                                         |
| ["rumen0081_GL1763932_1 [gene] locus=scaffold843398_10:1498:2511:+[Complete]"]                                                                                                                                                                        |
| ["rumen0081_GL1968913_1 [gene] locus=scaffold1870805_1:2933:4003:-[Complete]"]                                                                                                                                                                        |
| ["rumen0081_GL2018936_1 [gene] locus=scaffold443506_2:1:972:+[Lack 5'-end"]                                                                                                                                                                           |
| ["rumen100058_GL0182296_1 [gene] locus=C59144964_1:74:715:+[Lack 3'-end"]                                                                                                                                                                             |
| ["rumen100058_GL0420621_1 [gene] locus=scaffold679606_2:1:717:+[Lack both ends"]                                                                                                                                                                      |
| ["rumen100058_GL0673369_1 [gene] locus=scaffold2677682_3:2:967:+[Lack 5'-end"]                                                                                                                                                                        |
| ["rumen100058_GL0752386_1 [gene] locus=scaffold2669260_1:3:608:+[Lack 5'-end"]                                                                                                                                                                        |
| ["rumen100058_GL0795452_1 [gene] locus=scaffold940039_6:3:542:-[Lack both ends"]                                                                                                                                                                      |
| ["rumen100058_GL1196038_1 [gene] locus=scaffold3288648_1:2:472:+[Lack 5'-end"]                                                                                                                                                                        |
| ["rumen100058_GL1413184_1 [gene] locus=scaffold186345_4:334:1347:-[Complete]"]                                                                                                                                                                        |
| ["rumen100058_GL1598357_1 [gene] locus=scaffold963304_1:1:561:+[Lack both ends"]                                                                                                                                                                      |
| ["rumen100058_GL1774012_1 [gene] locus=scaffold11065_2:14031:15044:+[Complete]"]                                                                                                                                                                      |
| ["rumen100058_GL1927446_1 [gene] locus=scaffold3059409_2:1:441:+[Lack 5'-end"]                                                                                                                                                                        |
| ["rumen100058_GL1952703_1 [gene] locus=scaffold2267543_1:85:783:-[Lack 5'-end"]                                                                                                                                                                       |
| ["rumen100058_GL2027952_1 [gene] locus=scaffold1493619_1:259:873:+[Lack 3'-end"]                                                                                                                                                                      |
| ["rumen100058_GL2251448_1 [gene] locus=scaffold1642429_11:3693:4700:-[Complete]",<br>"rumen2009040_GL0894487_1 [gene] locus=scaffold3058227_1:263:1270:-[Complete]",<br>"rumen2009040_GL0926795_1 [gene] locus=scaffold16901_2:313:1320:-[Complete]"] |
| ["rumen100058_GL2253244_1 [gene] locus=scaffold2919524_3:1:636:+[Lack 5'-end"]                                                                                                                                                                        |
| ["rumen100058_GL2866962_1 [gene] locus=scaffold2199901_2:2281:3213:-[Complete]"]                                                                                                                                                                      |
| ["rumen100058_GL2876265_1 [gene] locus=scaffold935118_1:350:1336:-[Complete]",<br>"rumen7049_GL1880481_1 [gene] locus=scaffold937463_1:1098:2084:+[Complete]",<br>"rumen7049_GL2581625_1 [gene] locus=scaffold742976_2:1011:1997:-[Complete]"]        |
| ["rumen100058_GL3345981_1 [gene] locus=scaffold653675_3:179:925:-[Lack 5'-end"]                                                                                                                                                                       |
| ["rumen100058_GL3545252_1 [gene] locus=scaffold3268156_1:99:986:+[Lack 3'-end"]                                                                                                                                                                       |
| ["rumen100058_GL3606733_1 [gene] locus=scaffold3171313_2:2:721:+[Lack 5'-end"]                                                                                                                                                                        |
| ["rumen100058_GL3608591_1 [gene] locus=scaffold3059409_1:2249:2845:+[Lack 3'-end"]                                                                                                                                                                    |
| ["rumen100058_GL3802860_1 [gene] locus=scaffold105156_2:1:978:-[Lack 3'-end"]                                                                                                                                                                         |
| ["rumen2009040_GL0393603_1 [gene] locus=scaffold2886108_1:1:843:+[Lack 5'-end"]                                                                                                                                                                       |
| ["rumen2009040_GL0401932_1 [gene] locus=scaffold1563128_1:7065:8075:+[Complete]",<br>"rumen2009040_GL1971060_1 [gene] locus=scaffold517671_1:656:1666:+[Complete]"]                                                                                   |

|                                                                                      |
|--------------------------------------------------------------------------------------|
| ["rumen2009040_GL0467795_1 [gene] locus=scaffold1551842_1:15:950:-[Complete]"]       |
| ["rumen2009040_GL0611515_1 [gene] locus=scaffold2319591_3:44:643:-[Lack 5'-end]"]    |
| ["rumen2009040_GL0632016_1 [gene] locus=scaffold2094132_1:3:686:-[Lack both ends]"]  |
| ["rumen2009040_GL0831155_4 [gene] locus=scaffold2323784_4:1:657:+[Lack both ends]"]  |
| ["rumen2009040_GL0865524_1 [gene] locus=C54003323_1:2:673:+[Lack both ends]"]        |
| ["rumen2009040_GL1053484_1 [gene] locus=scaffold3004335_1:2:991:-[Lack 3'-end]"]     |
| ["rumen2009040_GL1184095_1 [gene] locus=scaffold216471_1:1072:2076:+[Complete]"]     |
| ["rumen2009040_GL1244108_1 [gene] locus=scaffold836717_2:1:699:-[Lack 3'-end]"]      |
| ["rumen2009040_GL1647791_1 [gene] locus=scaffold701553_1:370:909:-[Lack 5'-end]"]    |
| ["rumen2009040_GL1719144_1 [gene] locus=scaffold441258_4:771:1565:-[Lack 5'-end]"]   |
| ["rumen2009040_GL1778089_1 [gene] locus=scaffold808100_2:1913:2893:+[Complete]"]     |
| ["rumen2009040_GL1928979_1 [gene] locus=scaffold648133_1:678:1652:-[Complete]"]      |
| ["rumen2009040_GL2041390_1 [gene] locus=scaffold519822_4:1:714:-[Lack both ends]"]   |
| ["rumen2009040_GL2064696_1 [gene] locus=scaffold24403_5:1142:1984:+[Lack 3'-end]"]   |
| ["rumen2009040_GL2209993_1 [gene] locus=scaffold2901289_2:1:474:-[Lack 3'-end]"]     |
| ["rumen2009040_GL2322489_1 [gene] locus=scaffold2669843_1:1:645:+[Lack both ends]"]  |
| ["rumen2009040_GL2768667_1 [gene] locus=scaffold1906587_1:2:526:-[Lack both ends]"]  |
| ["rumen2009040_GL2790716_1 [gene] locus=scaffold2580700_1:769:1767:+[Complete]"]     |
| ["rumen2009040_GL2934385_1 [gene] locus=scaffold953067_10:2237:3001:-[Lack 5'-end]"] |
| ["rumen2009040_GL3422701_1 [gene] locus=scaffold3031986_2:477:1478:+[Complete]"]     |
| ["rumen3042_GL0013013_1 [gene] locus=scaffold109084_2:686:1792:-[Complete]"]         |
| ["rumen3042_GL0523502_1 [gene] locus=scaffold734776_6:1041:2147:-[Complete]"]        |
| ["rumen3042_GL0074138_1 [gene] locus=scaffold473778_1:409:879:+[Lack 3'-end]"]       |
| ["rumen3042_GL0275810_1 [gene] locus=scaffold1062555_2:30:770:-[Lack 5'-end]"]       |
| ["rumen3042_GL0321068_1 [gene] locus=scaffold393578_4:355:906:+[Lack 3'-end]"]       |
| ["rumen3042_GL0324243_1 [gene] locus=scaffold2171383_3:1:789:+[Lack 5'-end]"]        |
| ["rumen3042_GL0374639_1 [gene] locus=scaffold1459401_3:1:612:-[Lack both ends]"]     |
| ["rumen3042_GL0508326_1 [gene] locus=scaffold903167_2:3:503:-[Lack 3'-end]"]         |
| ["rumen3042_GL0635709_1 [gene] locus=scaffold1801982_1:1:690:-[Lack 3'-end]"]        |
| ["rumen3042_GL0699078_1 [gene] locus=scaffold2436159_2:637:1731:+[Complete]"]        |
| ["rumen3042_GL0826681_1 [gene] locus=scaffold957001_1:3:812:-[Lack 3'-end]"]         |
| ["rumen3042_GL1258686_1 [gene] locus=scaffold829964_3:653:1666:+[Complete]"]         |
| ["rumen3042_GL1616734_1 [gene] locus=scaffold984813_2:1184:1885:+[Lack 3'-end]"]     |
| ["rumen3042_GL1714555_1 [gene] locus=scaffold966246_6:2:550:+[Lack both ends]"]      |
| ["rumen3042_GL1743074_1 [gene] locus=scaffold1491757_2:108:1103:+[Complete]"]        |
| ["rumen3042_GL1977907_1 [gene] locus=scaffold711712_1:1:618:-[Lack 3'-end]"]         |
| ["rumen3042_GL1978410_1 [gene] locus=scaffold1184793_2:2:919:+[Lack 5'-end]"]        |
| ["rumen3042_GL2064520_1 [gene] locus=scaffold2550855_1:6107:7144:+[Complete]"]       |
| ["rumen3042_GL2331231_1 [gene] locus=scaffold70346_2:2:766:+[Lack 5'-end]"]          |
| ["rumen3042_GL2352900_1 [gene] locus=scaffold1672082_1:3:785:+[Lack 5'-end]"]        |
| ["rumen3042_GL2538555_1 [gene] locus=scaffold1897435_2:3:650:-[Lack both ends]"]     |
| ["rumen3042_GL2542398_1 [gene] locus=scaffold2103164_1:16:1098:+[Complete]"]         |
| ["rumen3042_GL2567092_1 [gene] locus=scaffold678778_2:163:1221:-[Complete]"]         |

|                                                                                  |
|----------------------------------------------------------------------------------|
| ["rumen3042_GL2580748_1 [gene] locus=scaffold1683391_1:1:543:-[Lack 3'-end]"]    |
| ["rumen3042_GL2639737_1 [gene] locus=C50992643_1:63:656:-[Lack 5'-end]"]         |
| ["rumen3042_GL2775128_1 [gene] locus=scaffold1387699_3:505:1011:-[Lack 5'-end]"] |
| ["rumen3042_GL2824803_1 [gene] locus=scaffold1193901_2:172:708:-[Lack 5'-end]"]  |
| ["rumen552_GL0505066_1 [gene] locus=scaffold602548_6:3:968:-[Lack 3'-end]"]      |
| ["rumen552_GL0845075_1 [gene] locus=scaffold1019407_1:355:744:-[Lack 5'-end]"]   |
| ["rumen552_GL1002912_1 [gene] locus=scaffold1095106_1:3:938:-[Lack both ends]"]  |
| ["rumen552_GL1352490_1 [gene] locus=scaffold265239_5:3:509:-[Lack both ends]"]   |
| ["rumen552_GL1604742_1 [gene] locus=scaffold770560_4:151:1170:-[Lack 5'-end]"]   |
| ["rumen552_GL1727067_1 [gene] locus=scaffold755005_1:1:648:-[Lack 3'-end]"]      |
| ["rumen553_GL0455875_1 [gene] locus=scaffold46235_12:2554:3519:-[Complete]"]     |
| ["rumen553_GL0523540_1 [gene] locus=scaffold268121_2:1:612:-[Lack 3'-end]"]      |
| ["rumen554_GL0223422_1 [gene] locus=scaffold1470618_1:875:1390:+[Lack 3'-end]"]  |
| ["rumen554_GL0395216_1 [gene] locus=scaffold549399_1:1:477:-[Lack 3'-end]"]      |
| ["rumen554_GL0530969_1 [gene] locus=scaffold1614689_1:1:1086:-[Lack both ends]"] |
| ["rumen554_GL0877945_1 [gene] locus=scaffold649645_2:2209:3324:+[Complete]"]     |
| ["rumen554_GL0966680_1 [gene] locus=scaffold2097347_2:1978:2913:+[Lack 3'-end]"] |
| ["rumen554_GL1884248_1 [gene] locus=C39576505_1:2:571:+[Lack both ends]"]        |
| ["rumen554_GL1951062_1 [gene] locus=scaffold298222_2:1624:2670:-[Complete]"]     |
| ["rumen554_GL2035250_1 [gene] locus=scaffold536606_2:2:1060:+[Lack 5'-end]"]     |
| ["rumen554_GL2508113_1 [gene] locus=scaffold922117_5:734:1816:+[Lack 3'-end]"]   |
| ["rumen2009040_GL2686975_1 [gene] locus=C55695877_1:932:2017:-[Complete]"]       |
| ["rumen554_GL3164790_1 [gene] locus=scaffold208848_5:3:506:+[Lack both ends]"]   |
| ["rumen555_GL0157448_1 [gene] locus=scaffold207468_2:1005:2069:+[Complete]"]     |
| ["rumen3042_GL2771554_1 [gene] locus=scaffold30042_1:290:1354:-[Complete]"]      |
| ["rumen555_GL1109709_1 [gene] locus=scaffold1574979_1:2:469:-[Lack 3'-end]"]     |
| ["rumen583_GL0006884_1 [gene] locus=scaffold343648_2:12922:13914:+[Complete]"]   |
| ["rumen583_GL0502344_1 [gene] locus=scaffold339082_1:30623:31666:-[Complete]"]   |
| ["rumen583_GL0706440_1 [gene] locus=scaffold252626_1:808:1818:+[Complete]"]      |
| ["rumen7049_GL0308010_1 [gene] locus=scaffold2052315_1:188:796:-[Lack 5'-end]"]  |
| ["rumen7049_GL0385144_1 [gene] locus=C51642093_1:3:482:+[Lack 5'-end]"]          |
| ["rumen7049_GL1452498_1 [gene] locus=scaffold1929342_3:2:595:-[Lack both ends]"] |
| ["rumen7049_GL1729428_1 [gene] locus=scaffold1174407_2:1067:2062:+[Complete]"]   |
| ["rumen7049_GL2188481_1 [gene] locus=scaffold886512_2:481:1353:+[Lack 3'-end]"]  |
| ["rumen7049_GL2671781_1 [gene] locus=scaffold1096931_1:1:762:-[Lack both ends]"] |
| ["rumen7049_GL2771811_1 [gene] locus=scaffold2214772_3:127:768:-[Lack 5'-end]"]  |

## UC2

|                                                                                                |
|------------------------------------------------------------------------------------------------|
| ["Ncazy AOC93887.1 Beta-1", "4-mannooligosaccharide phosphorylase [Flavobacterium anhuiense]"] |
| "cazy AWK04528.1 glycosidase [Flavobacterium sp. HYN0056]"]                                    |
| "cazy AXB56708.1 glycosidase [Flavobacterium sp. HYN0086]"]                                    |
| "cazy 146152354 gb ABQ03208.1 protein of unknown function [Flavobacterium johnsoniae UW101]"]  |
| ["Ncazy AOE53425.1 glycosidase [Flavobacterium psychrophilum]"]                                |

|                                                                                                                                                                        |
|------------------------------------------------------------------------------------------------------------------------------------------------------------------------|
| "cazy AWH83856.1 glycosidase [Flavobacterium sp. HYN0059]",<br>"cazygi 947266270 gb ALM49808.1  glycosidase [Flavobacterium psychrophilum]"                            |
| "cazygi 1005374128 gb AMP99903.1  Glycosidase [Pedobacter cryoconitis]"                                                                                                |
| "cazygi 1008902684 gb AMR34349.1  glycosidase [Mucilaginibacter sp. PAMC 26640]"                                                                                       |
| "cazygi 1012312438 gb AMS30679.1  hypothetical protein AEM38_01165 [Hyphomonadaceae bacterium UKL 13-1]"                                                               |
| "cazygi 1015455903 gb AMV37685.1  Beta-1-, "4-mannooligosaccharide phosphorylase [Planctomyces sp. SH-PL62]"                                                           |
| "cazygi 1027796686 emb CUT14050.1  COG2152 predicted glycoside hydrolase [Bradyrhizobium sp.]"                                                                         |
| "cazygi 1027804947 emb CUU17819.1  COG2152 predicted glycoside hydrolase CDS [Bradyrhizobium sp.]"                                                                     |
| "cazygi 1028501711 gb ANE82221.1  glycosidase [Mycobacterium sp. YC-RL4]"                                                                                              |
| "cazygi 1033841697 gb ANH82550.1  glycosidase [Niabella sp. BS26]"                                                                                                     |
| "cazygi 1034245045 gb ANI38080.1  glycosidase [Mycobacterium vaccae 95051]"                                                                                            |
| "cazygi 1035533153 gb ANJ27972.1  glycosylase [Agromyces sp. AR33]"                                                                                                    |
| "cazygi 1047841245 gb ANW65006.1  glycosidase [Mycobacterium sp. dj-10]"                                                                                               |
| "cazygi 1050304164 gb ANZ40523.1  hypothetical protein BBK82_35480 [Lentzea sp. DHS C013]"                                                                             |
| "cazygi 158107806 gb ABW10003.1  glycosidase PH1107-related [Frankia sp. EAN1pec]"                                                                                     |
| "cazygi 255344342 gb ACU03668.1  glycosidase PH1107-related [Pedobacter heparinus DSM 2366]"                                                                           |
| "cazygi 256039487 gb ACU63031.1  glycosidase PH1107-related [Chitinophaga pinensis DSM 2588]"                                                                          |
| "cazygi 312129304 ref ADQ16291.1  glycosidase related protein [Leadbetterella byssophila DSM 17132]"                                                                   |
| "cazygi 32443503 emb CAD72945.1  conserved hypothetical protein [Rhodopirellula baltica SH 1]"                                                                         |
| "cazygi 324972906 gb ADY51890.1  glycosidase related protein [Pseudopedobacter saltans DSM 12145]"                                                                     |
| "cazygi 326550293 gb ADZ78678.1  glycosidase related protein [Sphingobacterium sp. 21]"                                                                                |
| "cazygi 381359447 dbj BAL76277.1  hypothetical protein S23_30710 [Bradyrhizobium sp. S23321]"                                                                          |
| "cazygi 381374982 dbj BAL91800.1  hypothetical protein AMIS_65800 [Actinoplanes missouriensis 431]"                                                                    |
| "cazygi 381386098 dbj BAM02914.1  hypothetical protein PSMK_07550 [Phycisphaera mikurensis NBRC 102666]"                                                               |
| "cazygi 383801350 gb AFH48430.1  Putative glycosylase [Ignavibacterium album JCM 16511]"                                                                               |
| "cazygi 384066316 emb CCG99526.1  glycosidase PH1107-related protein [Fibrella aestuarina BUZ 2]"                                                                      |
| "cazygi 390611914 gb AFM13066.1  glycosidase related protein [Turneriella parva DSM 21527]"                                                                            |
| "cazygi 399230158 gb AFP37651.1  Glycosidase PH1107-related protein [Mycobacterium smegmatis str. MC2 155]"                                                            |
| "cazygi 430016148 gb AGA27862.1  putative glycosylase [Singulisphaera acidiphila DSM 18658]"                                                                           |
| "cazygi 430736185 gb AGA60122.1  glycoside hydrolase [Aminobacter sp. Gsoil204]"                                                                                       |
| "cazygi 456358657 dbj BAM93102.1  hypothetical protein S58_71370 [Bradyrhizobium oligotrophicum S58]"                                                                  |
| "cazygi 469480061 gb AGH50286.1  glycosidase [Sphingomonas sp. MM-1]"                                                                                                  |
| "cazygi 469480931 gb AGH51156.1  glycosidase PH1107-like protein [Sphingomonas sp. MM-1]"                                                                              |
| "cazygi 469481522 gb AGH51613.1  hypothetical protein G432_19610 (plasmid) [Sphingomonas sp. MM-1]"                                                                    |
| "cazygi 492008597 gb AGL19917.1  PH1107-like glycosidase [Actinoplanes sp. N902-109]"                                                                                  |
| "cazygi 510024552 emb CCW36629.1  Predicted glycosylase [Chthonomonas calidirosea T49]"                                                                                |
| "cazygi 537742677 emb CDF80320.1  conserved hypothetical protein [Formosa agariphila KMM 3901]"                                                                        |
| "cazygi 556037616 gb AGZ44863.1  glycosidase [Actinoplanes friuliensis DSM 7358]"                                                                                      |
| "cazygi 565684332 gb AHC24192.1  glycosidase [Mycobacterium neoaurum VKM Ac-1815D]",<br>"cazygi 1003099503 gb AMO04816.1  glycosidase [Mycobacterium sp. NRRL B-3805]" |
| "cazygi 569545415 gb AHE57032.1  hypothetical protein NX02_27230 [Sphingomonas sanxanigenens DSM 19645 = NX02]"                                                        |
| "cazygi 573476715 gb AHF93726.1  glycosidase [Opitutaceae bacterium TAV5]"                                                                                             |
| "cazygi 610423367 gb AHW60571.1  glycosidase [Draconibacterium orientale]"                                                                                             |

|                                                                                                                                                                                                                                                                                                                                                                                                                                                                                                             |
|-------------------------------------------------------------------------------------------------------------------------------------------------------------------------------------------------------------------------------------------------------------------------------------------------------------------------------------------------------------------------------------------------------------------------------------------------------------------------------------------------------------|
| <p>["cazy 676328648 gb AIM37149.1  glycosidase [Sphingobacterium sp. ML3W]",<br/> "cazy 672715095 emb CDS94603.1  Glycosidase [Sphingobacterium sp. PM2-P1-29]"]</p>                                                                                                                                                                                                                                                                                                                                        |
| <p>["cazy 695171782 gb AIT07872.1  glycosidase [Sphingomonas taxii]"]</p>                                                                                                                                                                                                                                                                                                                                                                                                                                   |
| <p>["cazy 698182875 gb AIT82398.1  glycosidase (plasmid) [Novosphingobium pentaromatorans US6-1]"]</p>                                                                                                                                                                                                                                                                                                                                                                                                      |
| <p>["cazy 698948887 gb AIU13081.1  glycosidase [Mycobacterium smegmatis]",<br/> "cazy 698957170 gb AIU19705.1  glycosidase [Mycobacterium smegmatis]",<br/> "cazy 777215303 emb CKH15398.1  glycosidase [Mycobacterium smegmatis]"]</p>                                                                                                                                                                                                                                                                     |
| <p>["cazy 821325234 gb AKH18715.1  glycosidase (plasmid) [Sphingomonas sanxanigenens DSM 19645 = NX02]"]</p>                                                                                                                                                                                                                                                                                                                                                                                                |
| <p>["cazy 821325377 gb AKH18858.1  glycosidase (plasmid) [Sphingomonas sanxanigenens DSM 19645 = NX02]"]</p>                                                                                                                                                                                                                                                                                                                                                                                                |
| <p>["cazy 821325385 gb AKH18866.1  glycosidase (plasmid) [Sphingomonas sanxanigenens DSM 19645 = NX02]"]</p>                                                                                                                                                                                                                                                                                                                                                                                                |
| <p>["cazy 828180910 gb AKK26145.1  glycosidase [Mycobacterium sp. EPA45]"]</p>                                                                                                                                                                                                                                                                                                                                                                                                                              |
| <p>["cazy 998165786 gb AMK22950.1  glycosidase PH1107-like protein [Sphingobium sp. TKS]"]</p>                                                                                                                                                                                                                                                                                                                                                                                                              |
| <p>["cazy 998617162 dbj BAU53095.1  Beta-1", "4-mannooligosaccharide phosphorylase [Mucilaginibacter gotjawali]"]</p>                                                                                                                                                                                                                                                                                                                                                                                       |
| <p>["cazy AOG00709.1 hypothetical protein BSY18_2886 [Blastomonas sp. RAC04]"]</p>                                                                                                                                                                                                                                                                                                                                                                                                                          |
| <p>["cazy AOG08893.1 hypothetical protein BSY240_1987 [Agrobacterium sp. RAC06]"]</p>                                                                                                                                                                                                                                                                                                                                                                                                                       |
| <p>["cazy AOH84130.1 glycosidase [Sphingomonas panacis]",<br/> "cazy API58243.1 glycosidase [Sphingomonas sp. JJ-A5]",<br/> "cazy APR52417.1 glycosidase [Sphingomonas koreensis]",<br/> "cazy APX67239.1 glycosidase [Sphingomonas sp. LK11]",<br/> "cazy AUW56965.1 glycosidase [Sphingobium sp. SCG-1]",<br/> "cazy AXJ96986.1 glycosidase [Sphingomonas sp. FARSPH]",<br/> "cazy 695170294 gb AIT06384.1  glycosidase [Sphingomonas taxii]"]</p>                                                        |
| <p>["cazy AOH86817.1 glycosidase [Sphingomonas panacis]"]</p>                                                                                                                                                                                                                                                                                                                                                                                                                                               |
| <p>["cazy AOM76044.1 glycosidase [Pedobacter steynii]"]</p>                                                                                                                                                                                                                                                                                                                                                                                                                                                 |
| <p>["cazy AOO80560.1 glycosidase [Bosea vaviloviae]"]</p>                                                                                                                                                                                                                                                                                                                                                                                                                                                   |
| <p>["cazy AOR80665.1 glycosidase (plasmid) [Novosphingobium resinovorum]",<br/> "cazy AXB78745.1 glycosidase [Novosphingobium sp. P6W]",<br/> "cazy BBC70930.1 glycosidase [Altererythrobacter sp. B11]"]</p>                                                                                                                                                                                                                                                                                               |
| <p>["cazy AOW22449.1 glycosidase [Sphingomonas melonis TY]",<br/> "cazy ATI55837.1 glycosidase [Sphingomonas melonis]",<br/> "cazy 1026262148 gb ANC86520.1  glycosidase [Sphingomonas sp. NIC1]",<br/> "cazy 695171404 gb AIT07494.1  glycosidase [Sphingomonas taxii]"]</p>                                                                                                                                                                                                                               |
| <p>["cazy AOW23127.1 glycosidase [Sphingomonas melonis TY]",<br/> "cazy ATI56558.1 glycosidase [Sphingomonas melonis]",<br/> "cazy 1026262798 gb ANC87170.1  glycosidase [Sphingomonas sp. NIC1]"]</p>                                                                                                                                                                                                                                                                                                      |
| <p>["cazy APF17754.1 putative glycosyl hydrolase", "GH43/DUF377 family [Caldithrix abyssi DSM 13497]"]</p>                                                                                                                                                                                                                                                                                                                                                                                                  |
| <p>["cazy APG11330.1 glycosidase [Bradyrhizobium japonicum]",<br/> "cazy APO52757.1 glycosidase [Bradyrhizobium diazoefficiens]",<br/> "cazy AWM01740.1 glycosidase [Bradyrhizobium sp. 2 39S1MB]",<br/> "cazy AWM08039.1 glycosidase [Bradyrhizobium sp. 3 85S1MB]",<br/> "cazy AWO92058.1 glycosidase [Bradyrhizobium diazoefficiens]",<br/> "cazy SHG41007.1 Predicted glycosyl hydrolase", "GH43/DUF377 family [Bradyrhizobium erythropleii]",<br/> "cazy SHI07349.1 Predicted glycosyl hydrolase",</p> |

|                                                                                                                                                                                                                                                                                                                                                                                                                                                                                                                                                                                                                                                                               |
|-------------------------------------------------------------------------------------------------------------------------------------------------------------------------------------------------------------------------------------------------------------------------------------------------------------------------------------------------------------------------------------------------------------------------------------------------------------------------------------------------------------------------------------------------------------------------------------------------------------------------------------------------------------------------------|
| "cazy 806932017 dbj BAR63019.1  hypothetical protein NK6_9885 [Bradyrhizobium diazoefficiens]",<br>"cazy 1027481022 gb AND90349.1  glycosidase [Bradyrhizobium diazoefficiens USDA 110]",<br>"cazy 736035080 gb AJA61541.1  glycosidase [Bradyrhizobium japonicum]",<br>"cazy 627784905 gb AHY54122.1  hypothetical protein BJS_01507 [Bradyrhizobium japonicum SEMIA 5079]",<br>"cazy 659656081 emb CDN49126.1  Glycosidase PH1107-related [Neorhizobium galegae bv. orientalis str. HAMB1 540]",<br>"cazy 1002735159 gb AMN39076.1  glycosidase [Rhodoplanes sp. Z2-YC6860]"                                                                                                |
| ["cazy APR55329.1 glycosidase (plasmid) [Sphingomonas koreensis]",<br>"cazy BAV66555.1 hypothetical protein SCLO_2002220 (plasmid) [Sphingobium cloacae]",<br>"cazy 821325209 gb AKH18690.1  glycosidase (plasmid) [Sphingomonas sanxanigenens DSM 19645 = NX02]"]                                                                                                                                                                                                                                                                                                                                                                                                            |
| ["cazy APR55450.1 glycosidase (plasmid) [Sphingomonas koreensis]",<br>"cazy ARR57397.1 glycosidase (plasmid) [Sphingomonas wittichii DC-6]",<br>"cazy ATE67775.1 glycosidase (plasmid) [Rhizorhabdus dicambivorans]",<br>"cazy ATP19300.1 glycosidase [Sphingobium yanoikuyae]",<br>"cazy 821325336 gb AKH18817.1  glycosidase (plasmid) [Sphingomonas sanxanigenens DSM 19645 = NX02]"]                                                                                                                                                                                                                                                                                      |
| ["cazy APU98171.1 glycosidase [Sphingobacterium sp. B29]"]                                                                                                                                                                                                                                                                                                                                                                                                                                                                                                                                                                                                                    |
| ["cazy APW72948.1 glycosidase", "partial [Sphingopyxis granulii]"]                                                                                                                                                                                                                                                                                                                                                                                                                                                                                                                                                                                                            |
| ["cazy APW73724.1 glycosidase [Sphingopyxis granulii]",<br>"cazy APZ97389.1 glycosidase [Sphingopyxis sp. QXT-31]",<br>"cazy AVA14877.1 glycosidase [Sphingopyxis sp. MG]",<br>"cazy 991912921 gb AMG76131.1  Glycosidase", "-related protein [Sphingopyxis granulii]",<br>"cazy 938157195 gb ALJ13556.1  glycosidase [Sphingopyxis macrogoltabida]",<br>"cazy 1015407695 gb AMU88997.1  glycosidase [Sphingopyxis macrogoltabida]",<br>"cazy 937289312 gb ALH79858.1  glycosidase [Sphingopyxis macrogoltabida]",<br>"cazy 924525793 gb ALC11957.1  glycosidase [Sphingopyxis sp. 113P3]",<br>"cazy 1015414355 gb AMU96148.1  glycosidase [Sphingopyxis terrae NBRC 15098]"] |
| ["cazy APX66063.1 glycosidase [Sphingomonas sp. LK11]"]                                                                                                                                                                                                                                                                                                                                                                                                                                                                                                                                                                                                                       |
| ["cazy APZ94250.1 Beta-1", "4-mannooligosaccharide phosphorylase [Fuerstia marisgermanicae]"]                                                                                                                                                                                                                                                                                                                                                                                                                                                                                                                                                                                 |
| ["cazy APZ99995.1 glycosidase [Sphingopyxis sp. QXT-31]",<br>"cazy 734571881 gb AJA09097.1  glycosidase [Sphingopyxis fribergensis]",<br>"cazy 1015412072 gb AMU93865.1  glycosidase [Sphingopyxis terrae NBRC 15098]"]                                                                                                                                                                                                                                                                                                                                                                                                                                                       |
| ["cazy AQG78080.1 glycosidase [Spirosoma montaniterrae]",<br>"cazy ARK10959.1 glycosidase [Fibrella sp. ES10-3-2-2]"]                                                                                                                                                                                                                                                                                                                                                                                                                                                                                                                                                         |
| ["cazy AQR74295.1 glycosidase [Sphingomonas sp. LM7]",<br>"cazy ARR54224.1 glycosidase [Sphingomonas wittichii DC-6]",<br>"cazy 761899411 gb AJP73780.1  glycosidase [Sphingomonas hengshuiensis]"]                                                                                                                                                                                                                                                                                                                                                                                                                                                                           |
| ["cazy ARS28226.1 hypothetical protein KC8_13165 [Sphingomonas sp. KC8]",<br>"cazy BAV66381.1 hypothetical protein SCLO_2000480 (plasmid) [Sphingobium cloacae]"]                                                                                                                                                                                                                                                                                                                                                                                                                                                                                                             |
| ["cazy ARS39725.1 glycosidase [Sphingobacteriaceae bacterium GW460-11-11-14-LB5]",<br>"cazy ATP55320.1 glycosidase [Pedobacter ginsengisoli]"]                                                                                                                                                                                                                                                                                                                                                                                                                                                                                                                                |
| ["cazy ARU17145.1 glycosidase [Croceiococcus marinus]",<br>"cazy 831209727 gb AKM11563.1  glycosidase [Croceiococcus naphthovorans]"]                                                                                                                                                                                                                                                                                                                                                                                                                                                                                                                                         |
| ["cazy ARU18462.1 glycosidase (plasmid) [Croceiococcus marinus]"]                                                                                                                                                                                                                                                                                                                                                                                                                                                                                                                                                                                                             |
| ["cazy ASB47878.1 glycosidase [Alkalitalea saponilacus]"]                                                                                                                                                                                                                                                                                                                                                                                                                                                                                                                                                                                                                     |
| ["cazy ASR50966.1 glycosidase [Blastomonas fulva]"]                                                                                                                                                                                                                                                                                                                                                                                                                                                                                                                                                                                                                           |



|                                                                                                                                                                                                                                                                                                                                                                                                                                                                                                |
|------------------------------------------------------------------------------------------------------------------------------------------------------------------------------------------------------------------------------------------------------------------------------------------------------------------------------------------------------------------------------------------------------------------------------------------------------------------------------------------------|
| ["cazy ASR56941.1 hypothetical protein CBP52_12735 [Cellulomonas sp. PSBB021]"]                                                                                                                                                                                                                                                                                                                                                                                                                |
| ["cazy ASU33243.1 glycosidase [Mucilagibacter sp. BJC16-A31]"]                                                                                                                                                                                                                                                                                                                                                                                                                                 |
| ["cazy ASY46536.1 glycosidase (plasmid) [Sphingobium hydrophobicum]",<br>"cazy ATP21746.1 glycosidase (plasmid) [Sphingobium yanoikuyae]",<br>"cazy BBE00152.1 glycosidase (plasmid) [Sphingobium amiense]"]                                                                                                                                                                                                                                                                                   |
| ["cazy ASZ12424.1 glycosidase [Chitinophaga sp. MD30]"]                                                                                                                                                                                                                                                                                                                                                                                                                                        |
| ["cazy ATC63143.1 glycosidase [Verrucomicrobia bacterium]"]                                                                                                                                                                                                                                                                                                                                                                                                                                    |
| ["cazy ATE67300.1 glycosidase [Rhizorhabdus dicambivorans]"]                                                                                                                                                                                                                                                                                                                                                                                                                                   |
| ["cazy ATL49030.1 glycosidase [Chitinophaga caeni]"]                                                                                                                                                                                                                                                                                                                                                                                                                                           |
| ["cazy ATO86111.1 glycosylase [Actinoplanes sp. SE50]",<br>"cazy SDT78711.1 Predicted glycosyl hydrolase", "GH43/DUF377 family [Actinoplanes derwentensis]",<br>"cazy SLM03525.1 glycosylase [Actinoplanes sp. SE50/110]"]                                                                                                                                                                                                                                                                     |
| ["cazy ATQ44096.1 glycosidase [Caulobacter mirabilis]"]                                                                                                                                                                                                                                                                                                                                                                                                                                        |
| ["cazy AUD04817.1 glycosidase [Spirosoma pollinicola]",<br>"cazy gij283815376 gb ADB37214.1  glycosidase PH1107-related protein [Spirosoma linguale DSM 74]",<br>"cazy gij808693885 gb AKD54724.1  glycosidase [Spirosoma radiotolerans]"]                                                                                                                                                                                                                                                     |
| ["cazy AUG56797.1 Beta-1", "4-mannooligosaccharide phosphorylase [Hungateiclostridium saccincola]"]                                                                                                                                                                                                                                                                                                                                                                                            |
| ["cazy AUN32396.1 glycosidase [Niveispirillum cyanobacterium]"]                                                                                                                                                                                                                                                                                                                                                                                                                                |
| ["cazy AUP80405.1 glycosidase [Flavivirga eckloniae]"]                                                                                                                                                                                                                                                                                                                                                                                                                                         |
| ["cazy AVA14706.1 glycosidase [Sphingopyxis sp. MG]",<br>"cazy BBA74232.1 glycosidase PH1107-like protein [Ochrobactrum sp. PW1]",<br>"cazy gij698182550 gb AIT82074.1  glycosidase (plasmid) [Novosphingobium pentaromativorans US6-1]",<br>"cazy gij991911667 gb AMG74877.1  Glycoside hydrolase [Sphingopyxis granuli]",<br>"cazy gij938157149 gb ALJ13510.1  glycosidase [Sphingopyxis macrogoltabida]",<br>"cazy gij1015407733 gb AMU89035.1  glycosidase [Sphingopyxis macrogoltabida]"] |
| ["cazy AVR45112.1 glycosidase [Gramella sp. SH35]"]                                                                                                                                                                                                                                                                                                                                                                                                                                            |
| ["cazy AWG26450.1 glycosidase [Flavobacterium kingsejongii]"]                                                                                                                                                                                                                                                                                                                                                                                                                                  |
| ["cazy AXG14456.1 glycosidase-like protein [Intrasporangium calvum]"]                                                                                                                                                                                                                                                                                                                                                                                                                          |
| ["cazy AXJ96197.1 glycosidase [Sphingomonas sp. FARSPH]"]                                                                                                                                                                                                                                                                                                                                                                                                                                      |
| ["cazy AXK78571.1 glycosidase [Mycolicibacterium neoaurum]"]                                                                                                                                                                                                                                                                                                                                                                                                                                   |
| ["cazy AXO32969.1 putative glycoside hydrolase [Micromonospora sp. B006]"]                                                                                                                                                                                                                                                                                                                                                                                                                     |
| ["cazy AXP81818.1 Beta-1-2C4-mannooligosaccharide phosphorylase [Mariniflexile sp. TRM1-10]"]                                                                                                                                                                                                                                                                                                                                                                                                  |
| ["cazy AYJ84568.1 glycosidase (plasmid) [Sphingomonas sp. YZ-8]"]                                                                                                                                                                                                                                                                                                                                                                                                                              |
| ["cazy AYJ85823.1 glycosidase [Sphingomonas sp. YZ-8]"]                                                                                                                                                                                                                                                                                                                                                                                                                                        |
| ["cazy AYJ86812.1 glycosidase [Sphingomonas sp. YZ-8]"]                                                                                                                                                                                                                                                                                                                                                                                                                                        |
| ["cazy AYL97076.1 glycosidase [Mucilagibacter sp. HYN0043]"]                                                                                                                                                                                                                                                                                                                                                                                                                                   |
| ["cazy AYO75858.1 glycosidase (plasmid) [Sphingobium yanoikuyae]"]                                                                                                                                                                                                                                                                                                                                                                                                                             |
| ["cazy BAV66533.1 hypothetical protein SCLO_2002000 (plasmid) [Sphingobium cloacae]"]                                                                                                                                                                                                                                                                                                                                                                                                          |
| ["cazy BAX80033.1 glycosidase [Marinifilaceae bacterium SPP2]"]                                                                                                                                                                                                                                                                                                                                                                                                                                |
| ["cazy BBA14119.1 Glycosidase [Petrimonas sp. IBARAKI]",<br>"cazy SCM55110.1", "4-beta-mannosyl-N-acetylglucosamine phosphorylase (ECO:0000303 PubMed:23943617) [Petrimonas mucosa]"]                                                                                                                                                                                                                                                                                                          |
| ["cazy BBB08500.1 glycosidase [Sphingopyxis sp. EG6]"]                                                                                                                                                                                                                                                                                                                                                                                                                                         |
| ["cazy BBC73503.1 glycosidase [Altererythrobacter sp. B11]"]                                                                                                                                                                                                                                                                                                                                                                                                                                   |

|                                                                                                                                                                                                                                                                                                         |
|---------------------------------------------------------------------------------------------------------------------------------------------------------------------------------------------------------------------------------------------------------------------------------------------------------|
| ["cazy BBD02204.1 hypothetical protein YGS_C2P0217 [Sphingobium sp. YG1]"]                                                                                                                                                                                                                              |
| ["cazy BBD98211.1 glycosidase [Sphingobium amiense]"]                                                                                                                                                                                                                                                   |
| ["cazy BBF81586.1 predicted glycoside hydrolase [Asticcacaulis excentricus]"]                                                                                                                                                                                                                           |
| ["cazy SBV32411.1 conserved protein of unknown function [uncultured Sphingopyxis sp.]"]                                                                                                                                                                                                                 |
| ["cazy SBV34065.1 conserved protein of unknown function [uncultured Sphingopyxis sp.]"]                                                                                                                                                                                                                 |
| ["cazy SCD20035.1 Glycosyl hydrolase family 43 [Proteiniphilum saccharofermentans]"]                                                                                                                                                                                                                    |
| ["cazy SCE81998.1 Predicted glycosyl hydrolase"," GH43/DUF377 family [Micromonospora coriariae]"]                                                                                                                                                                                                       |
| ["cazy SCG16578.1 Predicted glycosyl hydrolase"," GH43/DUF377 family [Micromonospora echinofusca]"]                                                                                                                                                                                                     |
| ["cazy SCG71427.1 Predicted glycosyl hydrolase"," GH43/DUF377 family [Micromonospora zamorensis]"]                                                                                                                                                                                                      |
| ["cazy SCG77273.1 Predicted glycosyl hydrolase"," GH43/DUF377 family [Micromonospora inositola],<br>"cazy 556034428 gb AGZ41675.1  glycosidase [Actinoplanes friuliensis DSM 7358]"]                                                                                                                    |
| ["cazy SDJ47152.1 Predicted glycosyl hydrolase"," GH43/DUF377 family [Bradyrhizobium ottawaense],<br>"cazy SDR93691.1 Predicted glycosyl hydrolase"," GH43/DUF377 family [Bradyrhizobium canariense],<br>"cazy SHK72495.1 Predicted glycosyl hydrolase"," GH43/DUF377 family [Bradyrhizobium lablabi]"] |
| ["cazy SDM92606.1 Predicted glycosyl hydrolase"," GH43/DUF377 family [Afipia sp. GAS231]"]                                                                                                                                                                                                              |
| ["cazy SDR71326.1 Predicted glycosyl hydrolase"," GH43/DUF377 family [Actinopolymorpha singaporensis]"]                                                                                                                                                                                                 |
| ["cazy SDS41644.1 Predicted glycosyl hydrolase"," GH43/DUF377 family [Mucilaginibacter mallensis]"]                                                                                                                                                                                                     |
| ["cazy SDT42454.1 Predicted glycosyl hydrolase"," GH43/DUF377 family [Friedmanniella luteola]"]                                                                                                                                                                                                         |
| ["cazy SDT97486.1 Predicted glycosyl hydrolase"," GH43/DUF377 family [Verrucomicrobium sp. GAS474]"]                                                                                                                                                                                                    |
| ["cazy SHL05964.1 Predicted glycosyl hydrolase"," GH43/DUF377 family [Bradyrhizobium lablabi]"]                                                                                                                                                                                                         |
| ["cazy SNV48420.1 Domain of uncharacterised function (DUF377) [Sphingobacterium mizutaii]"]                                                                                                                                                                                                             |

### UC3

|                                                                                                                                                                                                                                                                                                                                                                                                                                                                                                                                                                                                                                                                                                                                                                                                                                                                                |
|--------------------------------------------------------------------------------------------------------------------------------------------------------------------------------------------------------------------------------------------------------------------------------------------------------------------------------------------------------------------------------------------------------------------------------------------------------------------------------------------------------------------------------------------------------------------------------------------------------------------------------------------------------------------------------------------------------------------------------------------------------------------------------------------------------------------------------------------------------------------------------|
| ["cazy 1016919455 gb AMY11887.1  Beta-1", "4-mannooligosaccharide phosphorylase [Acidobacteria bacterium DSM 100886]"]                                                                                                                                                                                                                                                                                                                                                                                                                                                                                                                                                                                                                                                                                                                                                         |
| ["cazy 1027788893 emb CUS04732.1  conserved protein of unknown function [Ardenticatena]"]                                                                                                                                                                                                                                                                                                                                                                                                                                                                                                                                                                                                                                                                                                                                                                                      |
| ["cazy 159889857 gb ABX02937.1  glycosidase PH1107-related [Herpetosiphon aurantiacus DSM 785]"]                                                                                                                                                                                                                                                                                                                                                                                                                                                                                                                                                                                                                                                                                                                                                                               |
| ["cazy 19916824 gb AAM06210.1  conserved hypothetical protein [Methanosarcina acetivorans C2A]"]                                                                                                                                                                                                                                                                                                                                                                                                                                                                                                                                                                                                                                                                                                                                                                               |
| ["cazy 20517637 gb AAM25746.1  predicted glycosylase [Caldanaerobacter subterraneus subsp. tengcongensis MB4],<br>"cazy 694167300 gb AIS53471.1  beta-1", "4-mannooligosaccharide phosphorylase [Thermoanaerobacter kivui]"]                                                                                                                                                                                                                                                                                                                                                                                                                                                                                                                                                                                                                                                   |
| ["cazy 20907595 gb AAM32640.1  conserved protein [Methanosarcina mazei Go],<br>"cazy 805367849 gb AKB64961.1  hypothetical protein MSMAS_1765 [Methanosarcina mazei S-6],<br>"cazy 805364371 gb AKB61645.1  hypothetical protein MSMA_P_1660 [Methanosarcina mazei SarPi],<br>"cazy 452101355 gb AGF98295.1  hypothetical protein MmTuc01_3026 [Methanosarcina mazei Tuc01],<br>"cazy 805360882 gb AKB40671.1  hypothetical protein MSMAW_1680 [Methanosarcina mazei WWM610]"]                                                                                                                                                                                                                                                                                                                                                                                                 |
| ["cazy 222455536 gb ACM59798.1  glycosidase PH1107-related [Caldicellulosiruptor besicii DSM 6725],<br>"cazy 311778212 gb ADQ07698.1  glycosidase related protein [Caldicellulosiruptor hydrothermalis 108],<br>"cazy 312180843 gb ADQ41013.1  glycosidase related protein [Caldicellulosiruptor kristjanssonii I77R1B],<br>"cazy 312203467 gb ADQ46794.1  glycosidase related protein [Caldicellulosiruptor kronotskyensis 2002],<br>"cazy 343964401 gb AEM73548.1  glycosidase related protein [Caldicellulosiruptor lactoaceticus 6A],<br>"cazy 302574154 gb ADL41945.1  glycosidase related protein [Caldicellulosiruptor obsidiansis OB47],<br>"cazy 311774639 gb ADQ04126.1  glycosidase related protein [Caldicellulosiruptor owensensis OL],<br>"cazy 145409466 gb ABP66470.1  glycosidase"," PH1107-related protein [Caldicellulosiruptor saccharolyticus DSM 8903]"] |
| ["cazy 256357926 gb ACU71423.1  glycosidase PH1107-related [Catenuispora acidiphila DSM 44928]"]                                                                                                                                                                                                                                                                                                                                                                                                                                                                                                                                                                                                                                                                                                                                                                               |

|                                                                                                                                                                                                                                                                                                                                                                                                                                                                                                                        |
|------------------------------------------------------------------------------------------------------------------------------------------------------------------------------------------------------------------------------------------------------------------------------------------------------------------------------------------------------------------------------------------------------------------------------------------------------------------------------------------------------------------------|
| ["cazygi 256362862 gb ACU76359.1  glycosidase PH1107-related [Catenuispora acidiphila DSM 44928]"]                                                                                                                                                                                                                                                                                                                                                                                                                     |
| ["cazygi 262335690 gb ACY49487.1  glycosidase PH1107-related protein [Rhodothermus marinus DSM 4252]",<br>"cazygi 345113684 gb AEN74516.1  glycosidase related protein [Rhodothermus marinus SG0.5JP17-172]"]                                                                                                                                                                                                                                                                                                          |
| ["cazygi 283437935 gb ADB16377.1  glycosidase PH1107-related protein [Pirellula staleyii DSM 6068]"]                                                                                                                                                                                                                                                                                                                                                                                                                   |
| ["cazygi 289182776 gb ADC90020.1  glycosidase PH1107-related protein [Thermocrinis albus DSM 14484]"]                                                                                                                                                                                                                                                                                                                                                                                                                  |
| ["cazygi 290570138 gb ADD43103.1  glycosidase PH1107-related protein [Stackebrandtia nassauensis DSM 44728]"]                                                                                                                                                                                                                                                                                                                                                                                                          |
| ["cazygi 290754977 dbj BAI81354.1  conserved hypothetical protein [Deferribacter desulfuricans SSM1]"]                                                                                                                                                                                                                                                                                                                                                                                                                 |
| ["cazygi 297165045 gb ADI14756.1  glycosidase-related protein [Truepera radiovictrix DSM 17093]"]                                                                                                                                                                                                                                                                                                                                                                                                                      |
| ["cazygi 309749954 gb ADO84614.1  glycosidase PH1107-related protein (plasmid) [Ilyobacter polytropus DSM 2926]"]                                                                                                                                                                                                                                                                                                                                                                                                      |
| ["cazygi 333749895 gb AEF95002.1  glycosidase related protein [Desulfotomaculum nigrificans CO-1-SRB]"]                                                                                                                                                                                                                                                                                                                                                                                                                |
| ["cazygi 359825205 gb AEV67978.1  putative glycosylase [[Clostridium] clariflavum DSM 19732]"]                                                                                                                                                                                                                                                                                                                                                                                                                         |
| ["cazygi 374851343 dbj BAL54306.1  glycosidase [uncultured prokaryote]"]                                                                                                                                                                                                                                                                                                                                                                                                                                               |
| ["cazygi 390624871 gb AFM26078.1  putative glycosylase [Desulfomonile tiedjei DSM 6799]"]                                                                                                                                                                                                                                                                                                                                                                                                                              |
| ["cazygi 395811041 gb AFN73790.1  Glycosidase [Melioribacter roseus P3M-2]"]                                                                                                                                                                                                                                                                                                                                                                                                                                           |
| ["cazygi 409171345 gb AFV25220.1  hypothetical protein Mpsy_3021 [Methanolobus psychrophilus R15]"]                                                                                                                                                                                                                                                                                                                                                                                                                    |
| ["cazygi 409171348 gb AFV25223.1  hypothetical protein Mpsy_3024 [Methanolobus psychrophilus R15]"]                                                                                                                                                                                                                                                                                                                                                                                                                    |
| ["cazygi 488451852 gb AGK98554.1  putative glycosylase [Clostridium pasteurianum BC1]"]                                                                                                                                                                                                                                                                                                                                                                                                                                |
| ["cazygi 573473034 gb AHF90045.1  glycosidase [Opitutaceae bacterium TAV5]"]                                                                                                                                                                                                                                                                                                                                                                                                                                           |
| ["cazygi 673066667 emb CDZ24022.1  glycosidase-like protein [[Clostridium] cellulosi]"]                                                                                                                                                                                                                                                                                                                                                                                                                                |
| ["cazygi 763683253 gb AJQ25503.1  glycosidase related protein [Pelosinus fermentans JBW45]"]                                                                                                                                                                                                                                                                                                                                                                                                                           |
| ["cazygi 805336947 gb AKB18229.1  hypothetical protein MSWHS_1366 [Methanosarcina sp. WWM596]"]                                                                                                                                                                                                                                                                                                                                                                                                                        |
| ["cazygi 805340529 gb AKB21554.1  hypothetical protein MSWH1_1283 [Methanosarcina sp. WH1]",<br>"cazygi 19916827 gb AAM06213.1  conserved hypothetical protein [Methanosarcina acetivorans C2A]"]                                                                                                                                                                                                                                                                                                                      |
| ["cazygi 805352552 gb AKB32867.1  hypothetical protein MSSIH_2177 [Methanosarcina siciliae HI350]"]                                                                                                                                                                                                                                                                                                                                                                                                                    |
| ["cazygi 805356935 gb AKB37006.1  hypothetical protein MSSAC_2416 [Methanosarcina siciliae C2J]",<br>"cazygi 805352369 gb AKB32684.1  hypothetical protein MSSIH_1994 [Methanosarcina siciliae HI350]",<br>"cazygi 805348346 gb AKB28968.1  hypothetical protein MSSIT_2249 [Methanosarcina siciliae T4/M]",<br>"cazygi 805348139 gb AKB28761.1  hypothetical protein MSSIT_2042 [Methanosarcina siciliae T4/M]",<br>"cazygi 19916327 gb AAM05768.1  conserved hypothetical protein [Methanosarcina acetivorans C2A]"] |
| ["cazygi 805357115 gb AKB37186.1  hypothetical protein MSSAC_2596 [Methanosarcina siciliae C2J]"]                                                                                                                                                                                                                                                                                                                                                                                                                      |
| ["cazygi 805358024 gb AKB38095.1  hypothetical protein MSSAC_3505 [Methanosarcina siciliae C2J]",<br>"cazygi 80533708 gb AKB15341.1  hypothetical protein MSTHC_1023 [Methanosarcina thermophila CHTI-55]",<br>"cazygi 805332062 gb AKB14015.1  hypothetical protein MSTHT_2257 [Methanosarcina thermophila TM-1]"]                                                                                                                                                                                                    |
| ["cazygi 805377250 gb AKB73322.1  hypothetical protein MSLAZ_0061 [Methanosarcina lacustris Z-7289]"]                                                                                                                                                                                                                                                                                                                                                                                                                  |
| ["cazygi 805378839 gb AKB74911.1  hypothetical protein MSLAZ_1650 [Methanosarcina lacustris Z-7289]",<br>"cazygi 805340853 gb AKB21878.1  hypothetical protein MSWH1_1607 [Methanosarcina sp. WH1]",<br>"cazygi 805337275 gb AKB18557.1  hypothetical protein MSWHS_1694 [Methanosarcina sp. WWM596]",<br>"cazygi 805385618 gb AKB81199.1  hypothetical protein MSBR3_0621 [Methanosarcina barkeri 3]"]                                                                                                                |
| ["cazygi 805382850 gb AKB78727.1  hypothetical protein MSHOH_2244 [Methanosarcina horonobensis HB-1 = JCM 15518]"]                                                                                                                                                                                                                                                                                                                                                                                                     |
| ["cazygi 805383064 gb AKB78941.1  hypothetical protein MSHOH_2458 [Methanosarcina horonobensis HB-1 = JCM 15518]"]                                                                                                                                                                                                                                                                                                                                                                                                     |
| ["cazygi 805383132 gb AKB79009.1  hypothetical protein MSHOH_2526 [Methanosarcina horonobensis HB-1 = JCM 15518]"]                                                                                                                                                                                                                                                                                                                                                                                                     |
| ["cazygi 805383620 gb AKB79497.1  hypothetical protein MSHOH_3014 [Methanosarcina horonobensis HB-1 = JCM 15518]"]                                                                                                                                                                                                                                                                                                                                                                                                     |
| ["cazygi 805386140 gb AKB81721.1  hypothetical protein MSBR3_1143 [Methanosarcina barkeri 3]"]                                                                                                                                                                                                                                                                                                                                                                                                                         |

|                                                                                                                                                                                                                                                                                                                                                                                                                                                                                                                                                                                                                                                                                                                                                                                                                                                                                                                                                                                                                                                                                                                                                                                                                                                                                                                                                                                                                                                                                                                                                                                                                                                                                                                         |
|-------------------------------------------------------------------------------------------------------------------------------------------------------------------------------------------------------------------------------------------------------------------------------------------------------------------------------------------------------------------------------------------------------------------------------------------------------------------------------------------------------------------------------------------------------------------------------------------------------------------------------------------------------------------------------------------------------------------------------------------------------------------------------------------------------------------------------------------------------------------------------------------------------------------------------------------------------------------------------------------------------------------------------------------------------------------------------------------------------------------------------------------------------------------------------------------------------------------------------------------------------------------------------------------------------------------------------------------------------------------------------------------------------------------------------------------------------------------------------------------------------------------------------------------------------------------------------------------------------------------------------------------------------------------------------------------------------------------------|
| <p>["cazygi 805395560 gb AKB46392.1  hypothetical protein MSKOL_0615 [Methanosarcina sp. Kolksee]",</p> <p>"cazygi 805330281 gb AKB12234.1  hypothetical protein MSTHT_0476 [Methanosarcina thermophila TM-1]",</p> <p>"cazygi 805391804 gb AKB42902.1  hypothetical protein MSVAZ_0633 [Methanosarcina vacuolata Z-761]"</p>                                                                                                                                                                                                                                                                                                                                                                                                                                                                                                                                                                                                                                                                                                                                                                                                                                                                                                                                                                                                                                                                                                                                                                                                                                                                                                                                                                                           |
| <p>["cazygi 827039147 gb AKJ63706.1  putative glycoside hydrolase [Verrucomicrobia bacterium L21-Fru-AB]"</p>                                                                                                                                                                                                                                                                                                                                                                                                                                                                                                                                                                                                                                                                                                                                                                                                                                                                                                                                                                                                                                                                                                                                                                                                                                                                                                                                                                                                                                                                                                                                                                                                           |
| <p>["cazygi 827397648 gb AKJ37809.1  glycoside hydrolase GH130 family [Methanosarcina barkeri CM1]",</p> <p>"cazygi 805404860 gb AKB54666.1  hypothetical protein MSBRM_1668 [Methanosarcina barkeri MS]",</p> <p>"cazygi 805400966 gb AKB51486.1  hypothetical protein MSBRW_2233 [Methanosarcina barkeri str. Wiesmoor]",</p> <p>"cazygi 805382254 gb AKB78131.1  hypothetical protein MSHOH_1648 [Methanosarcina horonobensis HB-1 = JCM 15518]",</p> <p>"cazygi 805374689 gb AKB71059.1  hypothetical protein MSMAC_1169 [Methanosarcina mazei C16]",</p> <p>"cazygi 805374875 gb AKB71245.1  hypothetical protein MSMAC_1355 [Methanosarcina mazei C16]",</p> <p>"cazygi 20907400 gb AAM32467.1  conserved protein [Methanosarcina mazei Go1]",</p> <p>"cazygi 805371788 gb AKB68522.1  hypothetical protein MSMAL_1979 [Methanosarcina mazei LYC]",</p> <p>"cazygi 805371248 gb AKB67982.1  hypothetical protein MSMAL_1439 [Methanosarcina mazei LYC]",</p> <p>"cazygi 805368039 gb AKB65151.1  hypothetical protein MSMAS_1955 [Methanosarcina mazei S-6]",</p> <p>"cazygi 805364558 gb AKB61832.1  hypothetical protein MSMAP_1847 [Methanosarcina mazei SarPi]",</p> <p>"cazygi 452101160 gb AGF98100.1  hypothetical protein MmTuc01_2818 [Methanosarcina mazei Tuc01]",</p> <p>"cazygi 805361070 gb AKB40859.1  hypothetical protein MSMAW_1868 [Methanosarcina mazei WWM610]",</p> <p>"cazygi 805396668 gb AKB47500.1  hypothetical protein MSKOL_1723 [Methanosarcina sp. Kolksee]",</p> <p>"cazygi 805392925 gb AKB44023.1  hypothetical protein MSVAZ_1754 [Methanosarcina vacuolata Z-761]",</p> <p>"cazygi 805408088 gb AKB57251.1  hypothetical protein MSBR2_0735 [Methanosarcina barkeri 227]"</p> |
| <p>["cazygi 85722651 gb ABC77594.1  hypothetical cytosolic protein [Syntrophus aciditrophicus SB]"</p>                                                                                                                                                                                                                                                                                                                                                                                                                                                                                                                                                                                                                                                                                                                                                                                                                                                                                                                                                                                                                                                                                                                                                                                                                                                                                                                                                                                                                                                                                                                                                                                                                  |
| <p>["cazygi 921146216 dbj BAS29302.1  glycosidase [Limnochorda pilosa]"</p>                                                                                                                                                                                                                                                                                                                                                                                                                                                                                                                                                                                                                                                                                                                                                                                                                                                                                                                                                                                                                                                                                                                                                                                                                                                                                                                                                                                                                                                                                                                                                                                                                                             |
| <p>["cazygi 973198458 gb ALX07675.1  glycosidase related protein [Ruminiclostridium thermocellum AD2]",</p> <p>"cazygi 125715815 gb ABN54307.1  glycosidase related protein [Ruminiclostridium thermocellum ATCC 27405]",</p> <p>"cazygi 316939711 gb ADU73745.1  glycosidase related protein [Ruminiclostridium thermocellum DSM 1313]",</p> <p>"cazygi 1046311829 gb ANV5417.1  glycosidase related protein [Ruminiclostridium thermocellum DSM 2360]"</p>                                                                                                                                                                                                                                                                                                                                                                                                                                                                                                                                                                                                                                                                                                                                                                                                                                                                                                                                                                                                                                                                                                                                                                                                                                                            |
| <p>["cazy AOP33799.1 glycosidase [Leptospira alstonii]"</p>                                                                                                                                                                                                                                                                                                                                                                                                                                                                                                                                                                                                                                                                                                                                                                                                                                                                                                                                                                                                                                                                                                                                                                                                                                                                                                                                                                                                                                                                                                                                                                                                                                                             |
| <p>["cazy APF17755.1 putative glycosyl hydrolase", "GH43/DUF377 family [Caldithrix abyssi DSM 13497]"</p>                                                                                                                                                                                                                                                                                                                                                                                                                                                                                                                                                                                                                                                                                                                                                                                                                                                                                                                                                                                                                                                                                                                                                                                                                                                                                                                                                                                                                                                                                                                                                                                                               |
| <p>["cazy APF19181.1 putative glycosyl hydrolase", "GH43/DUF377 family [Caldithrix abyssi DSM 13497]"</p>                                                                                                                                                                                                                                                                                                                                                                                                                                                                                                                                                                                                                                                                                                                                                                                                                                                                                                                                                                                                                                                                                                                                                                                                                                                                                                                                                                                                                                                                                                                                                                                                               |
| <p>["cazy APZ94252.1 Beta-1", "4-mannooligosaccharide phosphorylase [Fuerstia marisgermanicae]"</p>                                                                                                                                                                                                                                                                                                                                                                                                                                                                                                                                                                                                                                                                                                                                                                                                                                                                                                                                                                                                                                                                                                                                                                                                                                                                                                                                                                                                                                                                                                                                                                                                                     |
| <p>["cazy AQO6985.1 Beta-1", "4-mannooligosaccharide phosphorylase [Phycisphaerae bacterium SM-Chi-D1]"</p>                                                                                                                                                                                                                                                                                                                                                                                                                                                                                                                                                                                                                                                                                                                                                                                                                                                                                                                                                                                                                                                                                                                                                                                                                                                                                                                                                                                                                                                                                                                                                                                                             |
| <p>["cazy AQO75139.1 hypothetical protein [uncultured bacterium]"</p>                                                                                                                                                                                                                                                                                                                                                                                                                                                                                                                                                                                                                                                                                                                                                                                                                                                                                                                                                                                                                                                                                                                                                                                                                                                                                                                                                                                                                                                                                                                                                                                                                                                   |
| <p>["cazy AQT67267.1 Beta-1", "4-mannooligosaccharide phosphorylase [Phycisphaerae bacterium ST-NAGAB-D1]"</p>                                                                                                                                                                                                                                                                                                                                                                                                                                                                                                                                                                                                                                                                                                                                                                                                                                                                                                                                                                                                                                                                                                                                                                                                                                                                                                                                                                                                                                                                                                                                                                                                          |
| <p>["cazy AQT69233.1 Beta-1", "4-mannooligosaccharide phosphorylase [Phycisphaerae bacterium ST-NAGAB-D1]"</p>                                                                                                                                                                                                                                                                                                                                                                                                                                                                                                                                                                                                                                                                                                                                                                                                                                                                                                                                                                                                                                                                                                                                                                                                                                                                                                                                                                                                                                                                                                                                                                                                          |
| <p>["cazy ARU40590.1 glycosidase [Armatimonadetes bacterium Uphv1-Ar1]"</p>                                                                                                                                                                                                                                                                                                                                                                                                                                                                                                                                                                                                                                                                                                                                                                                                                                                                                                                                                                                                                                                                                                                                                                                                                                                                                                                                                                                                                                                                                                                                                                                                                                             |
| <p>["cazy AVM45738.1 glycosidase [Victivallales bacterium CCUG 44730]",</p> <p>"humangut340101.Vvad_PD1643 [Complete]:- codon-table.11]"</p>                                                                                                                                                                                                                                                                                                                                                                                                                                                                                                                                                                                                                                                                                                                                                                                                                                                                                                                                                                                                                                                                                                                                                                                                                                                                                                                                                                                                                                                                                                                                                                            |
| <p>["cazy AVM46485.1 glycosidase [Victivallales bacterium CCUG 44730]"</p>                                                                                                                                                                                                                                                                                                                                                                                                                                                                                                                                                                                                                                                                                                                                                                                                                                                                                                                                                                                                                                                                                                                                                                                                                                                                                                                                                                                                                                                                                                                                                                                                                                              |
| <p>["cazy AWB09627.1 putative glycosyl hydrolase", "GH43/DUF377 family [Thermodesulfobium acidiphilum]",</p> <p>"cazygi 332178210 gb AEE13899.1  glycosidase related protein [Thermodesulfobium narugense DSM 14796]"</p>                                                                                                                                                                                                                                                                                                                                                                                                                                                                                                                                                                                                                                                                                                                                                                                                                                                                                                                                                                                                                                                                                                                                                                                                                                                                                                                                                                                                                                                                                               |
| <p>["cazy AWB09634.1 putative glycosyl hydrolase", "GH43/DUF377 family [Thermodesulfobium acidiphilum]",</p> <p>"cazygi 332178216 gb AEE13905.1  glycosidase related protein [Thermodesulfobium narugense DSM 14796]"</p>                                                                                                                                                                                                                                                                                                                                                                                                                                                                                                                                                                                                                                                                                                                                                                                                                                                                                                                                                                                                                                                                                                                                                                                                                                                                                                                                                                                                                                                                                               |
| <p>["cazy AXC09803.1 putative glycoside hydrolase [Acidobacteriaceae bacterium SBC82]"</p>                                                                                                                                                                                                                                                                                                                                                                                                                                                                                                                                                                                                                                                                                                                                                                                                                                                                                                                                                                                                                                                                                                                                                                                                                                                                                                                                                                                                                                                                                                                                                                                                                              |

|                                                                                                                                                                                                                                                                                                                                                                                                                                                                                                                                                                                                                                                                                                                                                                                                                                                                                                                                                                                                                                                                                                                                                                                                                                        |
|----------------------------------------------------------------------------------------------------------------------------------------------------------------------------------------------------------------------------------------------------------------------------------------------------------------------------------------------------------------------------------------------------------------------------------------------------------------------------------------------------------------------------------------------------------------------------------------------------------------------------------------------------------------------------------------------------------------------------------------------------------------------------------------------------------------------------------------------------------------------------------------------------------------------------------------------------------------------------------------------------------------------------------------------------------------------------------------------------------------------------------------------------------------------------------------------------------------------------------------|
| <p>["cazy AYK13833.1 glycosidase [Methanosarcina flavescens]",</p> <p>"cazy BAW29818.1 conserved hypothetical protein [Methanosarcina thermophila]",</p> <p>"cazygi 827397862 gb AKJ38023.1  glycoside hydrolase GH130 family [Methanosarcina barkeri CM1]",</p> <p>"cazygi 805404638 gb AKB54444.1  hypothetical protein MSBRM_1446 [Methanosarcina barkeri MS]",</p> <p>"cazygi 72397404 gb AAZ71677.1  conserved hypothetical protein [Methanosarcina barkeri str. Fusaro]",</p> <p>"cazygi 805400684 gb AKB51204.1  hypothetical protein MSBRW_1951 [Methanosarcina barkeri str. Wiesmoor]",</p> <p>"cazygi 940663404 gb ALK06238.1  glycosidase [Methanosarcina sp. 795]",</p> <p>"cazygi 805396749 gb AKB47581.1  hypothetical protein MSKOL_1804 [Methanosarcina sp. Kolksee]",</p> <p>"cazygi 805332992 gb AKB14625.1  hypothetical protein MSTHC_0307 [Methanosarcina thermophila CHTI-55]",</p> <p>"cazygi 805330219 gb AKB12172.1  hypothetical protein MSTHT_0414 [Methanosarcina thermophila TM-1]",</p> <p>"cazygi 805392998 gb AKB44096.1  hypothetical protein MSVAZ_1827 [Methanosarcina vacuolata Z-761]",</p> <p>"cazygi 805408310 gb AKB57473.1  hypothetical protein MSBR2_0957 [Methanosarcina barkeri 227]"</p> |
| <p>["cazy AYK14555.1 glycosidase [Methanosarcina flavescens]"]</p>                                                                                                                                                                                                                                                                                                                                                                                                                                                                                                                                                                                                                                                                                                                                                                                                                                                                                                                                                                                                                                                                                                                                                                     |
| <p>["cazy AYK15987.1 glycosidase [Methanosarcina flavescens]",</p> <p>"cazy BAW29922.1 conserved hypothetical protein [Methanosarcina thermophila]",</p> <p>"cazygi 805385660 gb AKB81241.1  hypothetical protein MSBR3_0663 [Methanosarcina barkeri 3]",</p> <p>"cazygi 827397595 gb AKJ37756.1  glycoside hydrolase GH130 family [Methanosarcina barkeri CM1]",</p> <p>"cazygi 805404919 gb AKB54725.1  hypothetical protein MSBRM_1727 [Methanosarcina barkeri MS]",</p> <p>"cazygi 72397752 gb AAZ72025.1  conserved hypothetical protein [Methanosarcina barkeri str. Fusaro]",</p> <p>"cazygi 805400332 gb AKB50852.1  hypothetical protein MSBRW_1599 [Methanosarcina barkeri str. Wiesmoor]",</p> <p>"cazygi 940663319 gb ALK06153.1  glycosidase [Methanosarcina sp. 795]",</p> <p>"cazygi 805396382 gb AKB47214.1  hypothetical protein MSKOL_1437 [Methanosarcina sp. Kolksee]",</p> <p>"cazygi 805332930 gb AKB14563.1  hypothetical protein MSTHC_0245 [Methanosarcina thermophila CHTI-55]",</p> <p>"cazygi 805392665 gb AKB43763.1  hypothetical protein MSVAZ_1494 [Methanosarcina vacuolata Z-761]",</p> <p>"cazygi 805408031 gb AKB57194.1  hypothetical protein MSBR2_0678 [Methanosarcina barkeri 227]"</p>        |
| <p>["cazy BAW29060.1 conserved hypothetical protein [Methanosarcina thermophila]"]</p>                                                                                                                                                                                                                                                                                                                                                                                                                                                                                                                                                                                                                                                                                                                                                                                                                                                                                                                                                                                                                                                                                                                                                 |
| <p>["cazy SCD20033.1 Glycosyl hydrolase family 43 [Proteiniphilum saccharofermentans]",</p> <p>"cazygi 50877343 emb CAG37183.1  conserved hypothetical protein [Desulfotalea psychrophila Lsv54]"</p>                                                                                                                                                                                                                                                                                                                                                                                                                                                                                                                                                                                                                                                                                                                                                                                                                                                                                                                                                                                                                                  |
| <p>["cazy SDE97465.1 Predicted glycosyl hydrolase"," GH43/DUF377 family [Terriglobus roseus]"]</p>                                                                                                                                                                                                                                                                                                                                                                                                                                                                                                                                                                                                                                                                                                                                                                                                                                                                                                                                                                                                                                                                                                                                     |
| <p>["humangut158499257-stool2_revised_scaffold72074_1_gene141523 strand:+ start:690 stop:1607 length:918 start_codon:yes stop_codon:yes gene_type:complete<br/>[Complete] codon-table.11"]</p>                                                                                                                                                                                                                                                                                                                                                                                                                                                                                                                                                                                                                                                                                                                                                                                                                                                                                                                                                                                                                                         |
| <p>["humangut159571453-stool2_revised_C1123888_1_gene199483 strand:+ start:362 stop:928 length:567 start_codon:yes stop_codon:no gene_type:incomplete [Lack 3'-end] codon-table.11"]</p>                                                                                                                                                                                                                                                                                                                                                                                                                                                                                                                                                                                                                                                                                                                                                                                                                                                                                                                                                                                                                                               |
| <p>["humangut160400887-stool1_revised_C1477000_1_gene247217 strand:- start:446 stop:1270 length:825 start_codon:no stop_codon:yes gene_type:incomplete [Lack 5'-end] codon-table.11"]</p>                                                                                                                                                                                                                                                                                                                                                                                                                                                                                                                                                                                                                                                                                                                                                                                                                                                                                                                                                                                                                                              |
| <p>["humangut340101.Vvad_PD1241 [Complete]:- codon-table.11"]</p>                                                                                                                                                                                                                                                                                                                                                                                                                                                                                                                                                                                                                                                                                                                                                                                                                                                                                                                                                                                                                                                                                                                                                                      |
| <p>["humangut340101.Vvad_PD2400 [Complete]:- codon-table.11"]</p>                                                                                                                                                                                                                                                                                                                                                                                                                                                                                                                                                                                                                                                                                                                                                                                                                                                                                                                                                                                                                                                                                                                                                                      |
| <p>["humangut764062976-stool1_revised_scaffold23685_2_gene105148 strand:+ start:4207 stop:5172 length:966 start_codon:yes stop_codon:yes gene_type:complete<br/>[Complete] codon-table.11"]</p>                                                                                                                                                                                                                                                                                                                                                                                                                                                                                                                                                                                                                                                                                                                                                                                                                                                                                                                                                                                                                                        |
| <p>["humangut764062976-stool1_revised_scaffold27403_3_gene37791 strand:- start:76 stop:1032 length:957 start_codon:yes stop_codon:yes gene_type:complete [Complete]<br/>codon-table.11"]</p>                                                                                                                                                                                                                                                                                                                                                                                                                                                                                                                                                                                                                                                                                                                                                                                                                                                                                                                                                                                                                                           |
| <p>["humangutMH0169_GL0139631 [gene] locus=scaffold64081_2:2:439:+ [Lack 5'-end] codon-table.11"]</p>                                                                                                                                                                                                                                                                                                                                                                                                                                                                                                                                                                                                                                                                                                                                                                                                                                                                                                                                                                                                                                                                                                                                  |
| <p>["humangutMH0193_GL0131665 [gene] locus=scaffold32408_2:358:924:+ [Lack 3'-end] codon-table.11"]</p>                                                                                                                                                                                                                                                                                                                                                                                                                                                                                                                                                                                                                                                                                                                                                                                                                                                                                                                                                                                                                                                                                                                                |
| <p>["humangutMH0262_GL0072459 [gene] locus=scaffold88337_1:263:739:+ [Lack 3'-end] codon-table.11"]</p>                                                                                                                                                                                                                                                                                                                                                                                                                                                                                                                                                                                                                                                                                                                                                                                                                                                                                                                                                                                                                                                                                                                                |

|                                                                                                                                                                                                                                                                                   |
|-----------------------------------------------------------------------------------------------------------------------------------------------------------------------------------------------------------------------------------------------------------------------------------|
| ["humangutMH0309_GL0085017 [gene] locus=scaffold22344_10:439:1359:- [Complete] codon-table.11"]                                                                                                                                                                                   |
| ["humangutMH0354_GL0034140 [gene] locus=scaffold11732_2:2405:3403:+ [Complete] codon-table.11",<br>"pigEYZ-353B_GL0113613 [gene] locus=scaffold101503_1:566:1564:+ [Complete] codon-table.11",<br>"rumen552_GL0643663_1 [gene] locus=scaffold1113893_1:2767:3765:-[Complete]"]    |
| ["humangutMH0373_GL0093988 [gene] locus=scaffold47371_4:64:1038:- [Complete] codon-table.11",<br>"humangut764062976-stool1_revised_scaffold9809_2_gene2100 strand:- start:3175 stop:4149 length:975 start_codon:yes stop_codon:yes gene_type:complete [Complete] codon-table.11"] |
| ["humangutMH0406_GL0074073 [gene] locus=scaffold65977_5:374:904:+ [Lack 3'-end] codon-table.11"]                                                                                                                                                                                  |
| ["humangutMH0409_GL0192637 [gene] locus=scaffold117421_1:1:468:- [Lack 3'-end] codon-table.11"]                                                                                                                                                                                   |
| ["humangutMH0428_GL0177607 [gene] locus=scaffold57726_11:1695:2264:- [Lack 5'-end] codon-table.11"]                                                                                                                                                                               |
| ["humangutO2_UC40-1_GL0040994 [gene] locus=scaffold18544_1:2:892:+ [Lack 5'-end] codon-table.11"]                                                                                                                                                                                 |
| ["humangutO2_UC58-0_GL0161340 [gene] locus=scaffold17208_5:228:1049:- [Lack 5'-end] codon-table.11"]                                                                                                                                                                              |
| ["humangutT2D-51A_GL0093383 [gene] locus=scaffold93772_1:2:556:- [Lack both ends] codon-table.11"]                                                                                                                                                                                |
| ["humangutV1_CD15-3_GL0040164 [gene] locus=scaffold49695_3:2:484:+ [Lack 5'-end] codon-table.11"]                                                                                                                                                                                 |
| ["humangutV1_FI04_GL0203609 [gene] locus=scaffold17882_4:1:831:- [Lack 3'-end] codon-table.11"]                                                                                                                                                                                   |
| ["humangutV1_FI14_GL0222358 [gene] locus=scaffold137474_3:3308:4282:- [Complete] codon-table.11",<br>"cazygi 281315545 gb EFA99573.1  glycosidase PH1107-related protein [Victivallis vadensis ATCC BAA-548]"]                                                                    |
| ["pigDB-515B_GL0232700 [gene] locus=scaffold150890_7:564:1295:- [Lack 5'-end] codon-table.11"]                                                                                                                                                                                    |
| ["pigPIG-109_GL0047844 [gene] locus=C1990877_1:1:483:- [Lack 3'-end] codon-table.11"]                                                                                                                                                                                             |
| ["rumen100058_GL0983401_1 [gene] locus=scaffold3190690_1:24:965:+[Complete]"]                                                                                                                                                                                                     |
| ["rumen3042_GL0702297_1 [gene] locus=scaffold35316_6:241:1191:-[Complete]"]                                                                                                                                                                                                       |
| ["rumen3042_GL0999342_1 [gene] locus=scaffold80553_1:1918:2763:+[Lack 3'-end]"]                                                                                                                                                                                                   |
| ["rumen553_GL0472450_1 [gene] locus=scaffold411084_3:1515:2471:+[Complete]"]                                                                                                                                                                                                      |
| ["rumen554_GL0240044_1 [gene] locus=scaffold1516873_2:6503:7441:+[Complete]"]                                                                                                                                                                                                     |
| ["rumen7049_GL0107992_1 [gene] locus=scaffold2024283_2:43:975:+[Complete]"]                                                                                                                                                                                                       |

## UC4

|                                                                                                                                                                                                                                                                   |
|-------------------------------------------------------------------------------------------------------------------------------------------------------------------------------------------------------------------------------------------------------------------|
| ["humangut158256496-stool1_revised_scaffold18980_2_gene38785 strand:+ start:341 stop:1132 length:792 start_codon:yes stop_codon:yes gene_type:complete [Complete] codon-table.11"]                                                                                |
| ["humangut764487809-stool1_revised_scaffold4689_2_gene42041 strand:+ start:6929 stop:7918 length:990 start_codon:yes stop_codon:yes gene_type:complete [Complete] codon-table.11",<br>"rumen553_GL0826154_1 [gene] locus=scaffold435537_1:3775:4764:-[Complete]"] |
| ["humangutDLF004_GL0016933 [gene] locus=scaffold19599_3:8945:9850:+ [Complete] codon-table.11"]                                                                                                                                                                   |
| ["humangutDLM008_GL0061961 [gene] locus=scaffold44391_5:188:1057:- [Lack 5'-end] codon-table.11"]                                                                                                                                                                 |
| ["humangutED50A_GL0000867 [gene] locus=scaffold25008_1:46810:47682:- [Complete] codon-table.11"]                                                                                                                                                                  |
| ["humangutMH0011_GL0029022 [gene] locus=scaffold7568_3:2672:3619:- [Complete] codon-table.11"]                                                                                                                                                                    |
| ["humangutMH0096_GL0061141 [gene] locus=scaffold22077_6:4857:5867:- [Complete] codon-table.11"]                                                                                                                                                                   |
| ["humangutMH0101_GL0067829 [gene] locus=scaffold4763_8:26:1069:- [Complete] codon-table.11"]                                                                                                                                                                      |
| ["humangutMH0138_GL0002739 [gene] locus=scaffold19519_1:3272:4231:+ [Complete] codon-table.11"]                                                                                                                                                                   |
| ["humangutMH0189_GL0091319 [gene] locus=scaffold110197_1:1:651:- [Lack 3'-end] codon-table.11"]                                                                                                                                                                   |
| ["humangutMH0229_GL0107614 [gene] locus=scaffold25401_13:56:1099:+ [Complete] codon-table.11"]                                                                                                                                                                    |
| ["humangutMH0233_GL0013042 [gene] locus=scaffold9523_29:3585:4604:+ [Complete] codon-table.11"]                                                                                                                                                                   |
| ["humangutMH0233_GL0013043 [gene] locus=scaffold9523_29:4595:5641:+ [Complete] codon-table.11",                                                                                                                                                                   |

|                                                                                                   |
|---------------------------------------------------------------------------------------------------|
| "humangutMH0372_GL0056056 [gene] locus=scaffold81346_1:7107:8153:+ [Complete] codon-table.11"     |
| "humangutMH0233_GL0013044 [gene] locus=scaffold9523_29:5665:6690:+ [Complete] codon-table.11"     |
| "humangutMH0238_GL0120931 [gene] locus=scaffold18048_4:1:933:- [Lack 3'-end] codon-table.11"      |
| "humangutMH0276_GL0165020 [gene] locus=scaffold116114_1:580:1617:- [Complete] codon-table.11"     |
| "humangutMH0297_GL0042092 [gene] locus=scaffold24105_11:560:1507:- [Complete] codon-table.11"     |
| "humangutMH0326_GL0077808 [gene] locus=scaffold34917_6:2:562:+ [Lack 5'-end] codon-table.11"      |
| "humangutMH0432_GL0017216 [gene] locus=scaffold74274_2:677:1486:- [Complete] codon-table.11"      |
| "humangutMH0435_GL0128647 [gene] locus=scaffold48848_1:16702:17736:- [Complete] codon-table.11"   |
| "humangutMH0441_GL0072164 [gene] locus=scaffold106162_2:2:508:+ [Lack 5'-end] codon-table.11"     |
| "humangutMH0454_GL0224663 [gene] locus=scaffold167705_1:236:1120:- [Complete] codon-table.11"     |
| "humangutN037A_GL0076705 [gene] locus=scaffold96827_1:5901:6863:+ [Complete] codon-table.11"      |
| "humangutO2.UC12-2_GL0019987 [gene] locus=scaffold36507_5:3:1058:+ [Lack 5'-end] codon-table.11"  |
| "humangutO2.UC18-1_GL0145511 [gene] locus=scaffold115526_2:805:1779:- [Complete] codon-table.11"  |
| "humangutT2D-2A_GL0003884 [gene] locus=scaffold30816_1:16212:17159:+ [Complete] codon-table.11"   |
| "humangutT2D-52A_GL0026708 [gene] locus=scaffold15908_6:203:1180:- [Complete] codon-table.11"     |
| "humangutV1.CD6-0-PT_GL0147720 [gene] locus=scaffold69971_1:1:807:- [Lack 3'-end] codon-table.11" |
| "humangutV1.FI02_GL0025090 [gene] locus=scaffold94077_2:2:880:- [Lack 3'-end] codon-table.11"     |
| "humangutV1.F114_GL0038492 [gene] locus=scaffold50057_15:4786:5721:- [Complete] codon-table.11"   |
| "mouse10_GL0091524 [gene] locus=C802032_1:5542:6492:+ [Complete] codon-table.11"                  |
| "mouse3-3_GL0099932 [gene] locus=scaffold6365_18:4177:5181:- [Complete] codon-table.11"           |
| "pigPIG-011_GL0184940 [gene] locus=scaffold11862_1:595:1548:+ [Complete] codon-table.11",         |
| "pigPIG-039_GL0245309 [gene] locus=scaffold203270_1:210:1163:- [Complete] codon-table.11"         |
| "pigPIG-017_GL0015599 [gene] locus=scaffold31147_1:1:624:- [Lack both ends] codon-table.11"       |
| "pigPIG-099_GL0057693 [gene] locus=scaffold18816_2:414:1427:- [Complete] codon-table.11"          |
| "pigPIG_197_GL0235305 [gene] locus=scaffold185672_1:2:748:+ [Lack 5'-end] codon-table.11"         |
| "rumen0081_GL0027620_1 [gene] locus=scaffold536563_4:510:2939:- [Complete]"                       |
| "rumen0081_GL1034664_1 [gene] locus=scaffold1911713_1:79:1101:- [Complete]"                       |
| "rumen0081_GL1803283_1 [gene] locus=scaffold257285_1:3:1214:- [Lack both ends]"                   |
| "rumen0081_GL2504083_1 [gene] locus=scaffold96095_1:1488:2501:- [Complete]"                       |
| "rumen100058_GL0373208_1 [gene] locus=scaffold2313431_1:2:523:- [Lack both ends]"                 |
| "rumen100058_GL1078658_1 [gene] locus=scaffold177350_4:1:927:+ [Lack 5'-end]"                     |
| "rumen100058_GL1435802_1 [gene] locus=scaffold1536970_3:2:619:+ [Lack both ends]"                 |
| "rumen100058_GL1531659_1 [gene] locus=scaffold1737296_1:1703:2590:- [Complete]"                   |
| "rumen100058_GL2234764_1 [gene] locus=scaffold2839642_2:5632:6543:+ [Complete]"                   |
| "rumen100058_GL2690309_1 [gene] locus=scaffold247893_2:798:1784:- [Complete]"                     |
| "rumen100058_GL3224210_1 [gene] locus=scaffold1847454_2:2:1045:+ [Lack 5'-end]"                   |
| "rumen2009040_GL0393904_1 [gene] locus=scaffold1386324_1:2515:3567:+ [Complete]"                  |
| "rumen2009040_GL0435555_1 [gene] locus=scaffold22983_2:27115:28026:- [Complete]"                  |
| "rumen2009040_GL0597183_1 [gene] locus=scaffold1642628_1:108:1010:+ [Complete]",                  |
| "rumen7049_GL0623453_1 [gene] locus=scaffold46047_2:3:905:+ [Lack 5'-end]"                        |
| "rumen2009040_GL0734912_1 [gene] locus=scaffold3035117_1:3:830:- [Lack both ends]"                |
| "rumen2009040_GL1002494_1 [gene] locus=scaffold2437775_1:2:2122:- [Lack both ends]"               |
| "rumen2009040_GL2571825_1 [gene] locus=scaffold768466_11:487:1413:- [Complete]"                   |

|                                                                                   |
|-----------------------------------------------------------------------------------|
| ["rumen2009040_GL3531709_1 [gene] locus=scaffold1886671_1:2142:2930:-[Complete]"] |
| ["rumen3042_GL0041832_1 [gene] locus=scaffold1574742_2:1:1044:+[Lack 5'-end]"]    |
| ["rumen3042_GL0756330_1 [gene] locus=scaffold1795046_1:808:1719:-[Lack 5'-end]"]  |
| ["rumen3042_GL1432874_1 [gene] locus=scaffold2032861_1:2:634:+[Lack 5'-end]"]     |
| ["rumen3042_GL1702200_1 [gene] locus=C52378453_1:3:986:-[Lack 3'-end]"]           |
| ["rumen552_GL0306419_1 [gene] locus=scaffold372819_1:1160:12134:+[Complete]"]     |
| ["rumen552_GL0725128_1 [gene] locus=scaffold25472_4:71:943:+[Lack 3'-end]"]       |
| ["rumen552_GL0980381_1 [gene] locus=scaffold844410_1:8463:9398:-[Complete]"]      |
| ["rumen552_GL1270477_1 [gene] locus=C21838829_1:1:843:+[Lack both ends]"]         |
| ["rumen552_GL1612692_1 [gene] locus=scaffold222006_1:5081:6076:-[Complete]"]      |
| ["rumen553_GL0125182_1 [gene] locus=scaffold31694_2:2:787:-[Lack both ends]"]     |
| ["rumen553_GL0195818_1 [gene] locus=scaffold297294_2:52:1029:-[Complete]"]        |
| ["rumen553_GL0432390_1 [gene] locus=scaffold311754_6:810:1688:-[Complete]"]       |
| ["rumen554_GL0058843_1 [gene] locus=scaffold2186748_1:1:1608:-[Lack 3'-end]"]     |
| ["rumen554_GL0242537_1 [gene] locus=C39321293_1:1:537:+[Lack both ends]"]         |
| ["rumen554_GL0767578_1 [gene] locus=scaffold692326_7:242:1228:+[Complete]"]       |
| ["rumen554_GL1013538_1 [gene] locus=scaffold867912_4:1:882:-[Lack 3'-end]"]       |
| ["rumen554_GL1726577_1 [gene] locus=scaffold343966_3:1:531:-[Lack both ends]"]    |
| ["rumen554_GL2509294_1 [gene] locus=scaffold1971782_2:3:932:-[Lack 3'-end]"]      |
| ["rumen555_GL0472243_1 [gene] locus=scaffold232364_3:1509:3149:+[Lack 3'-end]"]   |
| ["rumen555_GL1429890_1 [gene] locus=scaffold1399540_1:80073:82535:+[Complete]"]   |
| ["rumen555_GL1580868_1 [gene] locus=scaffold7995_4:1113:2063:+[Complete]"]        |
| ["rumen555_GL1941667_1 [gene] locus=scaffold624502_1:1:930:-[Lack 3'-end]"]       |
| ["rumen555_GL2055061_1 [gene] locus=scaffold426608_1:3:542:-[Lack both ends]"]    |
| ["rumen555_GL2075599_1 [gene] locus=scaffold1570648_1:3117:4145:-[Complete]"]     |
| ["rumen583_GL0511310_1 [gene] locus=scaffold35205_7:5214:6182:+[Complete]"]       |
| ["rumen7049_GL0076584_1 [gene] locus=C53231994_1:302:1351:-[Complete]"]           |
| ["rumen7049_GL0127006_1 [gene] locus=scaffold1138997_2:3:734:+[Lack both ends]"]  |
| ["rumen7049_GL0214725_1 [gene] locus=scaffold1751583_1:1745:2773:+[Complete]"]    |
| ["rumen7049_GL0472254_1 [gene] locus=scaffold846035_1:3:1142:-[Lack both ends]"]  |
| ["rumen7049_GL0484382_1 [gene] locus=scaffold1272497_2:3:637:6123:-[Complete]"]   |
| ["rumen7049_GL0871356_1 [gene] locus=scaffold12802_1:1:1062:-[Lack 3'-end]"]      |
| ["rumen7049_GL2287543_1 [gene] locus=scaffold459179_2:1:669:+[Lack both ends]"]   |
| ["rumen7049_GL2483910_1 [gene] locus=scaffold1417062_1:1673:2695:-[Lack 5'-end]"] |

## UC5

|                                                                                                       |
|-------------------------------------------------------------------------------------------------------|
| ["cazygi 1001868162 gb AMM34648.1  glycosidase [Sinomonas atrocyanea]"]                               |
| ["cazygi 1008898328 gb AMR29993.1  glycosidase [Mucilaginibacter sp. PAMC 26640]"]                    |
| ["cazygi 1008898478 gb AMR30143.1  glycosidase [Mucilaginibacter sp. PAMC 26640]"]                    |
| ["cazygi 1042050605 gb ANP72493.1  glycosidase [Cryobacterium arcticum]"]                             |
| ["cazygi 116612543 gb ABK05267.1  glycosidase",<br>" PH1107-related protein [Arthrobacter sp. FB24]"] |
| ["cazygi 283808896 gb ADB30735.1  glycosidase PH1107-related protein [Kribbella flavida DSM 17836]"]  |



|                                                                                                                                                                                                                                                                                                                                                                                                                                                                                                                                                                                                                                                                                                                                                                                 |
|---------------------------------------------------------------------------------------------------------------------------------------------------------------------------------------------------------------------------------------------------------------------------------------------------------------------------------------------------------------------------------------------------------------------------------------------------------------------------------------------------------------------------------------------------------------------------------------------------------------------------------------------------------------------------------------------------------------------------------------------------------------------------------|
| ["cazy 344036218 gb AEM81943.1  glycosidase related protein [Streptomyces violaceusniger Tu 4113]"                                                                                                                                                                                                                                                                                                                                                                                                                                                                                                                                                                                                                                                                              |
| ["cazy 430014651 gb AGA26365.1  putative glycosylase [Singulisphaera acidiphila DSM 18658]"                                                                                                                                                                                                                                                                                                                                                                                                                                                                                                                                                                                                                                                                                     |
| ["cazy 430015464 gb AGA27178.1  putative glycosylase [Singulisphaera acidiphila DSM 18658]"                                                                                                                                                                                                                                                                                                                                                                                                                                                                                                                                                                                                                                                                                     |
| ["cazy 910742044 dbj BAS11444.1  beta-1", "4-mannooligosaccharide phosphorylase [Arthrobacter sp. Hiyo4]"                                                                                                                                                                                                                                                                                                                                                                                                                                                                                                                                                                                                                                                                       |
| ["cazy 910746572 dbj BAS15971.1  beta-1", "4-mannooligosaccharide phosphorylase [Arthrobacter sp. Hiyo8]"                                                                                                                                                                                                                                                                                                                                                                                                                                                                                                                                                                                                                                                                       |
| ["cazy 91802586 gb ABE64959.1  glycosidase", " PH1107-related (plasmid) [Nitrobacter hamburgensis X14]"                                                                                                                                                                                                                                                                                                                                                                                                                                                                                                                                                                                                                                                                         |
| ["cazy 927296265 gb ALE07716.1  glycosidase [Arthrobacter sp. ERGS1:01]"                                                                                                                                                                                                                                                                                                                                                                                                                                                                                                                                                                                                                                                                                                        |
| ["cazy 941977275 gb ALL08704.1  glycosidase [Pedobacter sp. PACM 27299]"                                                                                                                                                                                                                                                                                                                                                                                                                                                                                                                                                                                                                                                                                                        |
| ["cazy 971341525 gb ALV41709.1  glycosidase [Pseudarthrobacter sulfonivorans]"                                                                                                                                                                                                                                                                                                                                                                                                                                                                                                                                                                                                                                                                                                  |
| ["cazy AQP47186.1  glycosidase [Tessaracoccus aquimaris]"                                                                                                                                                                                                                                                                                                                                                                                                                                                                                                                                                                                                                                                                                                                       |
| ["cazy AQU71430.1  glycosidase [Streptomyces niveus]"                                                                                                                                                                                                                                                                                                                                                                                                                                                                                                                                                                                                                                                                                                                           |
| ["cazy ARC55674.1 1", "4-beta-mannosyl-N-acetylglucosamine phosphorylase [Frondehabitans sp. 762G35]",<br>"cazy SDH28511.1  Predicted glycosyl hydrolase", " GH43/DUF377 family [Leifsonia sp. 197AMF]",<br>"cazy SDJ09728.1  Predicted glycosyl hydrolase", " GH43/DUF377 family [Leifsonia sp. 466MF]",<br>"cazy SDJ60848.1  Predicted glycosyl hydrolase", " GH43/DUF377 family [Leifsonia sp. 157MF]",<br>"cazy SDN30974.1  Predicted glycosyl hydrolase", " GH43/DUF377 family [Leifsonia sp. 509MF]",<br>"cazy SEM90328.1  Predicted glycosyl hydrolase", " GH43/DUF377 family [Leifsonia sp. 467MF]",<br>"cazy SFM34653.1  Predicted glycosyl hydrolase", " GH43/DUF377 family [Leifsonia sp. 98AMF]",<br>"cazy 1029984076 gb ANF30333.1  glycosidase [Leifsonia xylif]" |
| ["cazy ARJ03840.1  glycosidase [Cnubacter physcomitrella]",<br>"cazy AWB90245.1  glycosidase [Salinibacterium sp. CGMCC 1.16371]",<br>"cazy AXH34393.1  glycosidase [Humibacter sp. BT305]",<br>"cazy SDH54002.1  Predicted glycosyl hydrolase", " GH43/DUF377 family [Microbacterium pygmaeum]"                                                                                                                                                                                                                                                                                                                                                                                                                                                                                |
| ["cazy ARU52422.1  glycosidase [Cellulosimicrobium cellulans]"                                                                                                                                                                                                                                                                                                                                                                                                                                                                                                                                                                                                                                                                                                                  |
| ["cazy ASD21953.1  glycosidase [Cryobacterium sp. LW097]",<br>"cazy SDT27368.1  Predicted glycosyl hydrolase", " GH43/DUF377 family [Jiangella sp. DSM 45060]"                                                                                                                                                                                                                                                                                                                                                                                                                                                                                                                                                                                                                  |
| ["cazy ATL88355.1  putative glycosidase [Streptomyces malaysiensis]",<br>"cazy AUA08447.1  Beta-1", "4-mannooligosaccharide phosphorylase [Streptomyces sp. M56]", "cazy 521355665 gb AGP53982.1  hypothetical protein M271_11925 [Streptomyces rapamycinicus NRRL 5491]"<br>"cazy 822597516 gb AKH86411.1  glycosidase [Streptomyces sp. CNQ-509]"                                                                                                                                                                                                                                                                                                                                                                                                                             |
| ["cazy AVH60180.1  glycosidase [Streptomyces dengpaensis]",<br>"cazy AVH60610.1  glycosidase [Streptomyces dengpaensis]",<br>"cazy AWW41409.1  glycosidase [Streptomyces sp. ZFG47]",<br>"cazy AWZ03955.1  glycosidase [Streptomyces sp. ICC4]",<br>"cazy AWZ11467.1  glycosidase [Streptomyces sp. ICC1]"                                                                                                                                                                                                                                                                                                                                                                                                                                                                      |
| ["cazy AWB88056.1  glycosidase [Mycetocola sp. 449]"                                                                                                                                                                                                                                                                                                                                                                                                                                                                                                                                                                                                                                                                                                                            |
| ["cazy SCF17406.1  Predicted glycosyl hydrolase", " GH43/DUF377 family [Micromonospora viridifaciens]"                                                                                                                                                                                                                                                                                                                                                                                                                                                                                                                                                                                                                                                                          |
| ["cazy SCY64477.1  Predicted glycosyl hydrolase", " GH43/DUF377 family [Microbacterium sp. LKL04]",<br>"cazy 545576718 gb AGW41830.1  glycosidase-related protein [Leifsonia xylif subsp. cynodontis DSM 46306]",<br>"cazy 323273515 dbj BAJ73660.1  predicted glycosylase [Microbacterium testaceum StLB037]"                                                                                                                                                                                                                                                                                                                                                                                                                                                                  |
| ["cazy SDH07407.1  Predicted glycosyl hydrolase", " GH43/DUF377 family [Leifsonia sp. 197AMF]",<br>"cazy SDJ32740.1  Predicted glycosyl hydrolase", " GH43/DUF377 family [Leifsonia sp. 466MF]",<br>"cazy SDK47187.1  Predicted glycosyl hydrolase", " GH43/DUF377 family [Leifsonia sp. 157MF]"                                                                                                                                                                                                                                                                                                                                                                                                                                                                                |

|                                                                                                        |
|--------------------------------------------------------------------------------------------------------|
| "cazy SDN53817.1 Predicted glycosyl hydrolase", "GH43/DUF377 family [Leifsonia sp. 509MF]",            |
| "cazy SEB07343.1 Predicted glycosyl hydrolase", "GH43/DUF377 family [Leifsonia sp. 21MFCrub1.1]",      |
| "cazy SEN56279.1 Predicted glycosyl hydrolase", "GH43/DUF377 family [Leifsonia sp. 467MF]",            |
| "cazy SFM73071.1 Predicted glycosyl hydrolase", "GH43/DUF377 family [Leifsonia sp. 98AMF]"             |
| ["cazy SDP38023.1 Predicted glycosyl hydrolase", "GH43/DUF377 family [Nakamurella panacisegetis]"]     |
| ["cazy SDS31711.1 Predicted glycosyl hydrolase", "GH43/DUF377 family [Friedmanniella luteola]"         |
| ["cazy SDS49464.1 Predicted glycosyl hydrolase", "GH43/DUF377 family [Agromyces flavus]"               |
| ["cazy SDS60844.1 Predicted glycosyl hydrolase", "GH43/DUF377 family [Mucilagibacter mallensis]"       |
| ["cazy SDT01232.1 Predicted glycosyl hydrolase", "GH43/DUF377 family [Actinopolymorpha singaporensis]" |
| ["cazy SDU66583.1 Predicted glycosyl hydrolase", "GH43/DUF377 family [Jiangella alkaliphila]"          |
| ["cazy SDV02219.1 Predicted glycosyl hydrolase", "GH43/DUF377 family [Friedmanniella sagamiharensis]"  |
| ["cazy SEA91313.1 Predicted glycosyl hydrolase", "GH43/DUF377 family [Leifsonia sp. 21MFCrub1.1]"      |

## UC6

|                                                                                                                                                                                                                                                                                                                                                                               |
|-------------------------------------------------------------------------------------------------------------------------------------------------------------------------------------------------------------------------------------------------------------------------------------------------------------------------------------------------------------------------------|
| ["humangut158499257-stool2_revised_scaffold72385_2_gene82008 strand:- start:4781 stop:5743 length:963 start_codon:yes stop_codon:yes gene_type:complete<br>[Complete] codon-table.11",<br><br>"humangut160400887-stool1_revised_C1502255_1_gene51724 strand:+ start:328 stop:1290 length:963 start_codon:yes stop_codon:yes gene_type:complete [Complete]<br>codon-table.11"] |
| ["humangut159227541-stool2_revised_scaffold7276_1_gene122964 strand:- start:8251 stop:9252 length:1002 start_codon:yes stop_codon:yes gene_type:complete<br>[Complete] codon-table.11"]                                                                                                                                                                                       |
| ["humangutMH0142_GL0034722 [gene] locus=scaffold9349_11:2:613:+ [Lack both ends] codon-table.11"]                                                                                                                                                                                                                                                                             |
| ["humangutMH0197_GL0140065 [gene] locus=scaffold35217_1:127:1110:- [Lack 5'-end] codon-table.11"]                                                                                                                                                                                                                                                                             |
| ["humangutMH0262_GL0139398 [gene] locus=scaffold85419_2:464:1021:- [Lack 5'-end] codon-table.11"]                                                                                                                                                                                                                                                                             |
| ["humangutMH0318_GL0049685 [gene] locus=scaffold118166_3:2:568:+ [Lack 5'-end] codon-table.11"]                                                                                                                                                                                                                                                                               |
| ["humangutMH0336_GL0012146 [gene] locus=scaffold109992_1:2:1000:- [Lack 3'-end] codon-table.11"]                                                                                                                                                                                                                                                                              |
| ["humangutMH0346_GL0101425 [gene] locus=scaffold14559_10:1:672:+ [Lack 5'-end] codon-table.11"]                                                                                                                                                                                                                                                                               |
| ["humangutMH0346_GL0103563 [gene] locus=C1364741_1:3:557:- [Lack both ends] codon-table.11"]                                                                                                                                                                                                                                                                                  |
| ["humangutMH0409_GL0096961 [gene] locus=scaffold22078_3:531:1487:+ [Complete] codon-table.11"]                                                                                                                                                                                                                                                                                |
| ["humangutMH0409_GL0137711 [gene] locus=scaffold120846_1:2:1210:+ [Lack 5'-end] codon-table.11"]                                                                                                                                                                                                                                                                              |
| ["humangutMH0454_GL0227900 [gene] locus=scaffold62405_1:3:617:+ [Lack both ends] codon-table.11"]                                                                                                                                                                                                                                                                             |
| ["humangutO2_UC40-1_GL0171371 [gene] locus=scaffold40152_4:210:845:+ [Lack 3'-end] codon-table.11"]                                                                                                                                                                                                                                                                           |
| ["humangutO2_UC40-1_GL0222073 [gene] locus=scaffold34346_1:2:622:+ [Lack both ends] codon-table.11"]                                                                                                                                                                                                                                                                          |
| ["humangutO2_UC47-1_GL0051376 [gene] locus=scaffold80731_1:3458:4300:- [Complete] codon-table.11"]                                                                                                                                                                                                                                                                            |
| ["humangutO2_UC52-0_GL0022652 [gene] locus=scaffold28367_2:644:1597:- [Complete] codon-table.11"]                                                                                                                                                                                                                                                                             |
| ["humangutO2_UC58-0_GL0126372 [gene] locus=scaffold45505_2:3:575:- [Lack both ends] codon-table.11"]                                                                                                                                                                                                                                                                          |
| ["humangutV1_FI14_GL0104269 [gene] locus=scaffold85970_10:338:1297:- [Complete] codon-table.11"]                                                                                                                                                                                                                                                                              |
| ["humangutV1_UC59-0_GL0148453 [gene] locus=scaffold69280_1:2:601:+ [Lack 5'-end] codon-table.11"]                                                                                                                                                                                                                                                                             |
| ["pigPIG_113_GL0207321 [gene] locus=scaffold195580_2:3286:4218:+ [Complete] codon-table.11"]                                                                                                                                                                                                                                                                                  |
| ["rumen0081_GL2480971_1 [gene] locus=scaffold1973809_4:2:604:-[Lack 3'-end]"]                                                                                                                                                                                                                                                                                                 |
| ["rumen3042_GL0125898_1 [gene] locus=scaffold342906_4:1502:2467:-[Complete]"]                                                                                                                                                                                                                                                                                                 |
| ["rumen3042_GL1087710_1 [gene] locus=scaffold2375413_1:1:507:-[Lack both ends]"]                                                                                                                                                                                                                                                                                              |
| ["rumen3042_GL1135338_1 [gene] locus=scaffold2541626_1:2906:3877:-[Complete]"]                                                                                                                                                                                                                                                                                                |
| ["rumen3042_GL1910308_1 [gene] locus=scaffold2307581_1:1:609:-[Lack both ends]"]                                                                                                                                                                                                                                                                                              |

|                                                                                  |
|----------------------------------------------------------------------------------|
| ["rumen3042_GL2776489_1 [gene] locus=scaffold1309776_2:2:853:+[Lack 5'-end]"]    |
| ["rumen3042_GL2791217_1 [gene] locus=scaffold1001623_4:394:1302:+[Lack 3'-end]"] |
| ["rumen554_GL0416144_1 [gene] locus=scaffold1978920_1:1946:2905:+[Complete]"]    |
| ["rumen554_GL2903134_1 [gene] locus=scaffold597931_9:1172:1801:+[Lack 3'-end]"]  |
| ["rumen7049_GL0087913_1 [gene] locus=C53044636_1:187:1155:+[Lack 3'-end]"]       |
| ["rumen7049_GL0628403_1 [gene] locus=C51084884_1:2:499:-[Lack both ends]"]       |

## UC7

|                                                                                                                                                                                                                                                                                                                        |
|------------------------------------------------------------------------------------------------------------------------------------------------------------------------------------------------------------------------------------------------------------------------------------------------------------------------|
| ["cazygi 378569207 gb AFC29517.1  hypothetical protein PM3016_2635 [Paenibacillus mucilaginosus 3016],<br>"cazygi 384090260 gb AFH61696.1  hypothetical protein B2K_13370 [Paenibacillus mucilaginosus K02],<br>"cazygi 336297832 gb AEI40935.1  conserved hypothetical protein [Paenibacillus mucilaginosus KNP414]"] |
| ["cazygi 573474722 gb AHF91733.1  hypothetical protein OPIT5_17390 [Opitutaceae bacterium TAV5]"]                                                                                                                                                                                                                      |
| ["cazygi 686517651 gb AIQ28352.1  hypothetical protein P40081_09285 [Paenibacillus sp. FSL P4-0081]"]                                                                                                                                                                                                                  |
| ["cazygi 686537905 gb AIQ48603.1  hypothetical protein R70723_23855 [Paenibacillus sp. FSL R7-0273],<br>"cazygi 686543392 gb AIQ54089.1  hypothetical protein R70331_22850 [Paenibacillus sp. FSL R7-0331]"]                                                                                                           |
| ["cazygi 686546435 gb AIQ57131.1  hypothetical protein PBOR_09450 [Paenibacillus borealis],<br>"cazygi 686529384 gb AIQ40083.1  hypothetical protein R50912_08590 [Paenibacillus sp. FSL R5-0912]"]                                                                                                                    |
| ["humangut340101.Vvad_PD3074 [Complete]:- codon-table.11"]                                                                                                                                                                                                                                                             |
| ["humangutMH0189_GL0091337 [gene] locus=scaffold66450_2:12028:13188:+ [Complete] codon-table.11"]                                                                                                                                                                                                                      |
| ["humangutMH0206_GL0063663 [gene] locus=scaffold45456_2:2:736:+ [Lack both ends] codon-table.11"]                                                                                                                                                                                                                      |
| ["humangutMH0431_GL0078632 [gene] locus=scaffold30057_3:3:620:+ [Lack 5'-end] codon-table.11"]                                                                                                                                                                                                                         |
| ["humangutO2_UC29-1_GL0090695 [gene] locus=scaffold46262_2:1:762:- [Lack 3'-end] codon-table.11"]                                                                                                                                                                                                                      |
| ["humangutO2_UC41-0_GL0042946 [gene] locus=scaffold31328_15:3:1133:- [Lack 3'-end] codon-table.11"]                                                                                                                                                                                                                    |
| ["mouseG1-8A_GL0038729 [gene] locus=scaffold17912_1:1303:2508:- [Complete] codon-table.11"]                                                                                                                                                                                                                            |
| ["pigPIG-042_GL0086388 [gene] locus=scaffold104638_3:889:1515:- [Lack 5'-end] codon-table.11"]                                                                                                                                                                                                                         |
| ["pigPIG-046_GL0013240 [gene] locus=scaffold81578_4:125:1333:- [Complete] codon-table.11"]                                                                                                                                                                                                                             |
| ["pigPIG-046_GL0176179 [gene] locus=scaffold14074_9:823:1977:+ [Complete] codon-table.11"]                                                                                                                                                                                                                             |
| ["pigPIG-076_GL0179006 [gene] locus=scaffold125115_1:179:814:+ [Lack 3'-end] codon-table.11"]                                                                                                                                                                                                                          |
| ["rumen0081_GL2147510_1 [gene] locus=scaffold1507797_2:605:1633:+[Lack 3'-end]"]                                                                                                                                                                                                                                       |
| ["rumen0081_GL2215322_1 [gene] locus=scaffold643617_3:2:916:+[Lack both ends]"]                                                                                                                                                                                                                                        |
| ["rumen3042_GL0867394_1 [gene] locus=scaffold1159051_2:399:1604:-[Complete]"]                                                                                                                                                                                                                                          |
| ["rumen3042_GL1213105_1 [gene] locus=scaffold828639_5:2:1075:-[Lack 3'-end]"]                                                                                                                                                                                                                                          |
| ["rumen3042_GL2237420_1 [gene] locus=scaffold311030_1:3:950:+[Lack 5'-end]"]                                                                                                                                                                                                                                           |
| ["rumen552_GL1306643_1 [gene] locus=scaffold643874_3:1:612:-[Lack 3'-end]"]                                                                                                                                                                                                                                            |
| ["rumen552_GL1309865_1 [gene] locus=scaffold231265_1:961:2169:+[Complete]"]                                                                                                                                                                                                                                            |
| ["rumen552_GL1412182_1 [gene] locus=scaffold1105037_1:309:1238:+[Lack 3'-end]"]                                                                                                                                                                                                                                        |
| ["rumen554_GL2480060_1 [gene] locus=scaffold874753_1:498:1718:-[Complete]"]                                                                                                                                                                                                                                            |
| ["rumen583_GL0634395_1 [gene] locus=scaffold581_1:303:1229:-[Lack 5'-end]"]                                                                                                                                                                                                                                            |
| ["rumen583_GL0642444_1 [gene] locus=scaffold88451_1:5910:7130:+[Complete]"]                                                                                                                                                                                                                                            |
| ["rumen7049_GL1849370_1 [gene] locus=scaffold855161_2:1027:2397:+[Complete]"]                                                                                                                                                                                                                                          |
| ["rumen7049_GL2458338_1 [gene] locus=scaffold2170225_1:1:621:+[Lack both ends]"]                                                                                                                                                                                                                                       |

## UC8

|                                                                                                                                                                                                                                                                                                                                                                                                                                                                                                                                                                                                        |
|--------------------------------------------------------------------------------------------------------------------------------------------------------------------------------------------------------------------------------------------------------------------------------------------------------------------------------------------------------------------------------------------------------------------------------------------------------------------------------------------------------------------------------------------------------------------------------------------------------|
| "Ncazy AOC96266.1 Beta-1", "4-mannooligosaccharide phosphorylase [Flavobacterium anhuiense]",<br>"cazy AXB59105.1 pesticidal protein Cry7Aa [Flavobacterium sp. HYN0086]"                                                                                                                                                                                                                                                                                                                                                                                                                              |
| "cazygi 1012308368 gb AMS26787.1  pesticidal protein Cry7Aa [Bacteroidetes bacterium UKL13-3]"                                                                                                                                                                                                                                                                                                                                                                                                                                                                                                         |
| "cazygi 146156290 gb ABQ07144.1  protein of unknown function [Flavobacterium johnsoniae UW101]"                                                                                                                                                                                                                                                                                                                                                                                                                                                                                                        |
| "cazygi 146156465 gb ABQ07319.1  protein of unknown function [Flavobacterium johnsoniae UW101]"                                                                                                                                                                                                                                                                                                                                                                                                                                                                                                        |
| "cazygi 312444444 gb ADQ80800.1  glycosidase related protein [Paludibacter propionigenes WB4]"                                                                                                                                                                                                                                                                                                                                                                                                                                                                                                         |
| "cazygi 324972948 gb ADY51932.1  glycosidase related protein [Pseudopedobacter saltans DSM 12145]"                                                                                                                                                                                                                                                                                                                                                                                                                                                                                                     |
| "cazygi 332336403 gb AEE53504.1  glycosidase related protein [Haliscomenobacter hydrossis DSM 1100]"                                                                                                                                                                                                                                                                                                                                                                                                                                                                                                   |
| "cazygi 674273058 dbj BAP32451.1  glycosidase [Chryseobacterium sp. StRB126]"                                                                                                                                                                                                                                                                                                                                                                                                                                                                                                                          |
| "cazygi 941975621 gb ALL07050.1  pesticidal protein Cry7Aa [Pedobacter sp. PACM 27299]",<br>"cazygi 941974835 gb ALL06264.1  pesticidal protein Cry7Aa [Pedobacter sp. PACM 27299]"                                                                                                                                                                                                                                                                                                                                                                                                                    |
| "cazygi 998616991 dbj BAU52924.1  Beta-1", "4-mannooligosaccharide phosphorylase [Mucilaginibacter gotjawali]"                                                                                                                                                                                                                                                                                                                                                                                                                                                                                         |
| "cazy AQW94859.1 pesticidal protein Cry7Aa [Elizabethkingia anophelis]",<br>"cazy AQX07818.1 pesticidal protein Cry7Aa [Elizabethkingia ursingii]",<br>"cazy AQX83981.1 pesticidal protein Cry7Aa [Elizabethkingia bruuniana]",<br>"cazy ATL43456.1 pesticidal protein Cry7Aa [Elizabethkingia miricola]",<br>"cazygi 769872902 gb AJW65144.1  Beta-1", "4-mannooligosaccharide phosphorylase [Elizabethkingia miricola]"                                                                                                                                                                              |
| "cazy ARV12310.1 pesticidal protein Cry7Aa [Gilvibacter sp. SZ-19]"                                                                                                                                                                                                                                                                                                                                                                                                                                                                                                                                    |
| "cazy ARV14799.1 pesticidal protein Cry7Aa [Polaribacter sp. SA4-12]"                                                                                                                                                                                                                                                                                                                                                                                                                                                                                                                                  |
| "cazy ASS50864.1 pesticidal protein Cry7Aa [Candidatus Fluvicola riflensis]"                                                                                                                                                                                                                                                                                                                                                                                                                                                                                                                           |
| "cazy ASU33050.1 pesticidal protein Cry7Aa [Mucilaginibacter sp. BJC16-A31]"                                                                                                                                                                                                                                                                                                                                                                                                                                                                                                                           |
| "cazy AWA30851.1 pesticidal protein Cry7Aa [Flavobacterium sp. HYN0048]",<br>"cazy AWI26887.1 pesticidal protein Cry7Aa [Flavobacterium sp. HYN0049]"                                                                                                                                                                                                                                                                                                                                                                                                                                                  |
| "cazy AXE18829.1 pesticidal protein Cry7Aa [Runella sp. HYN0085]",<br>"cazy SHH93191.1 Probable glycosidase", "PH1107-related protein [Flavobacterium psychrophilum]"                                                                                                                                                                                                                                                                                                                                                                                                                                  |
| "cazy SCD21651.1 Glycosyl hydrolase family 43 [Proteiniphilum saccharofermentans]"                                                                                                                                                                                                                                                                                                                                                                                                                                                                                                                     |
| "humangutMH0085_GL0052975 [gene] locus=scaffold24144_1:588:1619:+ [Complete] codon-table.11",<br>"humangutMH0110_GL0077006 [gene] locus=scaffold25166_3:30539:31570:- [Complete] codon-table.11",<br>"humangutMH0267_GL0191591 [gene] locus=scaffold8389_4:5151:6182:- [Complete] codon-table.11",<br>"humangutDLM002_GL0028684 [gene] locus=scaffold4301_12:573:1604:- [Complete] codon-table.11",<br>"humangutT2D-26A_GL0071593 [gene] locus=scaffold15549_4:116691:117722:+ [Complete] codon-table.11",<br>"mouseG1-2A_GL0069908 [gene] locus=scaffold51256_3:291:1322:+ [Complete] codon-table.11" |
| "humangutMH0101_GL0058946 [gene] locus=C907273_1:3:740:- [Lack both ends] codon-table.11"                                                                                                                                                                                                                                                                                                                                                                                                                                                                                                              |
| "humangutMH0250_GL0227047 [gene] locus=scaffold5499_8:2:520:+ [Lack 5'-end] codon-table.11"                                                                                                                                                                                                                                                                                                                                                                                                                                                                                                            |
| "humangutMH0267_GL0216388 [gene] locus=scaffold43994_9:6461:7495:- [Complete] codon-table.11"                                                                                                                                                                                                                                                                                                                                                                                                                                                                                                          |
| "mouseGroup2-5A_GL0073689 [gene] locus=scaffold45925_7:279:1193:+ [Lack 3'-end] codon-table.11"                                                                                                                                                                                                                                                                                                                                                                                                                                                                                                        |

## UC9

|                                                                                                                 |
|-----------------------------------------------------------------------------------------------------------------|
| "cazygi 384069514 emb CCH02724.1  hypothetical protein FAES_4725 [Fibrella aestuarina BUZ 2]"                   |
| "cazygi 469478590 gb AGH48815.1  glycosidase related protein [Sphingomonas sp. MM-1]"                           |
| "cazygi 761899770 gb AJP74139.1  glycosidase [Sphingomonas hengshuiensis]"                                      |
| "cazy AOH86025.1 glycosidase [Sphingomonas panacis]",<br>"cazy ATY32282.1 glycosidase [Sphingomonas sp. Cra20]" |

|                                                                                                                                                                                                                                                                                                                                                                 |
|-----------------------------------------------------------------------------------------------------------------------------------------------------------------------------------------------------------------------------------------------------------------------------------------------------------------------------------------------------------------|
| ["cazy AOW22975.1 glycosidase [Sphingomonas melonis TY]",<br>"cazy ATI56389.1 glycosidase [Sphingomonas melonis]",<br>"cazy 1026262635 gb ANC87007.1  glycosidase [Sphingomonas sp. NIC1]",<br>"cazy 695171035 gb AIT07125.1  glycosidase [Sphingomonas taxii]"]                                                                                                |
| ["cazy API59475.1 glycosidase [Sphingomonas sp. JJ-A5]"]                                                                                                                                                                                                                                                                                                        |
| ["cazy APR51401.1 glycosidase [Sphingomonas koreensis]",<br>"cazy APZ97396.1 glycosidase [Sphingopyxis sp. QXT-31]",<br>"cazy 938157188 gb ALJ13549.1  glycosidase [Sphingopyxis macrogoltabida]",<br>"cazy 1015407702 gb AMU89004.1  glycosidase [Sphingopyxis macrogoltabida]",<br>"cazy 937289309 gb ALH79855.1  glycosidase [Sphingopyxis macrogoltabida]"] |
| ["cazy APX66178.1 glycosidase [Sphingomonas sp. LK11]"]                                                                                                                                                                                                                                                                                                         |
| ["cazy AQR74940.1 glycosidase [Sphingomonas sp. LM7]",<br>"cazy 761898906 gb AJP73275.1  glycosidase [Sphingomonas hengshuiensis]",<br>"cazy 569540496 gb AHE52113.1  hypothetical protein NX02_01755 [Sphingomonas sanxanigenens DSM 19645 = NX02]"]                                                                                                           |
| ["cazy ATE66422.1 glycosidase [Rhizorhabdus dicambivorans]"]                                                                                                                                                                                                                                                                                                    |
| ["cazy ATQ44417.1 glycosidase [Caulobacter mirabilis]"]                                                                                                                                                                                                                                                                                                         |
| ["cazy ATY33401.1 glycosidase [Sphingomonas sp. Cra20]"]                                                                                                                                                                                                                                                                                                        |
| ["cazy AUN32391.1 glycosidase [Niveispirillum cyanobacterium]",<br>"cazy BBD98208.1 glycosidase [Sphingobium amiense]"]                                                                                                                                                                                                                                         |
| ["cazy AUW56966.1 glycosidase [Sphingobium sp. SCG-1]"]                                                                                                                                                                                                                                                                                                         |
| ["cazy AXB80036.1 glycosidase (plasmid) [Novosphingobium sp. P6W]",<br>"cazy 1015414349 gb AMU96142.1  glycosidase [Sphingopyxis terrae NBRC 15098]"]                                                                                                                                                                                                           |
| ["cazy AXJ95617.1 glycosidase [Sphingomonas sp. FARSPH]"]                                                                                                                                                                                                                                                                                                       |
| ["cazy SBV34078.1 conserved protein of unknown function [uncultured Sphingopyxis sp.]"]                                                                                                                                                                                                                                                                         |

### Small meta-nodes

|                                                                                                                                                                                                           |
|-----------------------------------------------------------------------------------------------------------------------------------------------------------------------------------------------------------|
| ["cazy 206739935 gb ACI18993.1  conserved hypothetical protein [Dictyoglomus thermophilum H-6-12]"]                                                                                                       |
| ["cazy 262335691 gb ACY49488.1  glycosidase PH1107-related protein [Rhodothermus marinus DSM 4252]",<br>"cazy 345113685 gb AEN74517.1  glycosidase related protein [Rhodothermus marinus SG0.5JP17-172]"] |
| ["cazy 217336150 gb ACK41943.1  glycosidase PH1107-related [Dictyoglomus turgidum DSM 6724]"]                                                                                                             |
| ["cazy 837353939 gb AKM83974.1  Glycosidase-related protein [Candidatus Campbellbacteria bacterium GW2011_OD1_34_28]"]                                                                                    |
| ["cazy 837348939 gb AKM78124.1  Glycosidase-related protein [Candidatus Wolfebacteria bacterium GW2011_GWB1_47_1]"]                                                                                       |
| ["cazy 837348940 gb AKM78125.1  Glycosidase-related protein [Candidatus Wolfebacteria bacterium GW2011_GWB1_47_1]"]                                                                                       |
| ["cazy AQS34661.1 hypothetical protein [uncultured bacterium]"]                                                                                                                                           |
| ["cazy 311224651 gb ADP77507.1  glycosidase PH1107-related protein [Methanothermus fervidus DSM 2088]"]                                                                                                   |
| ["rumen3042_GL2596963_1 [gene] locus=scaffold1257999_2:824:2365:-[Complete]"]                                                                                                                             |
| ["cazy 837353937 gb AKM83972.1  Glycosidase-related protein [Candidatus Campbellbacteria bacterium GW2011_OD1_34_28]"]                                                                                    |
| ["cazy 114338472 gb ABI69320.1  conserved hypothetical protein [Syntrophomonas wolfei subsp. wolfei str. Goettingen G311]"]                                                                               |
| ["cazy BAX79955.1 hypothetical protein ALGA_1579 [Marinifilaceae bacterium SPP2]"]                                                                                                                        |
| ["cazy 262333470 gb ACY47267.1  glycosidase PH1107-related protein [Rhodothermus marinus DSM 4252]",<br>"cazy 345111471 gb AEN72303.1  glycosidase related protein [Rhodothermus marinus SG0.5JP17-172]"] |
| ["mouseGroup2-1A_GL0053921 [gene] locus=scaffold35316_5:532:1638:+ [Complete] codon-table.11"]                                                                                                            |
| ["cazy ARA94165.1 glycosidase [Rhodothermaceae bacterium RA]"]                                                                                                                                            |

|                                                                                                                                                                                                                                                                                                                                                                                                                                                                                                                        |
|------------------------------------------------------------------------------------------------------------------------------------------------------------------------------------------------------------------------------------------------------------------------------------------------------------------------------------------------------------------------------------------------------------------------------------------------------------------------------------------------------------------------|
| ["cazy AVH57250.1 hypothetical protein C4B68_17345 [Streptomyces dengaensis]"]                                                                                                                                                                                                                                                                                                                                                                                                                                         |
| ["cazy 573475668 gb AHF92679.1  glycosidase [Opitutaceae bacterium TAV5]"]                                                                                                                                                                                                                                                                                                                                                                                                                                             |
| ["cazy 1001868161 gb AMM34647.1  hypothetical protein SA2016_3993 [Sinomonas atrocyanea]"]                                                                                                                                                                                                                                                                                                                                                                                                                             |
| ["cazy 359383778 emb CCE79694.1  PISO_001778 [Milleromyces farinosa CBS 7064]",<br>"cazy 359465278 emb CCE88983.1  PISO_001778 [Milleromyces farinosa CBS 7064]"]                                                                                                                                                                                                                                                                                                                                                      |
| ["cazy SGZ51348.1 C1C11C00000001274 [[Candida] intermedia],<br>"cazy SGZ52548.1 C1C11C00000000424 [[Candida] intermedia]"]                                                                                                                                                                                                                                                                                                                                                                                             |
| ["cazy 199433069 emb CAG88529.2  DEHA2E21890p [Debaryomyces hansenii CBS767]"]                                                                                                                                                                                                                                                                                                                                                                                                                                         |
| ["cazy 256558512 gb ACU84359.1  predicted glycosylase [Brachybacterium faecium DSM 4810]"]                                                                                                                                                                                                                                                                                                                                                                                                                             |
| ["cazy 262333469 gb ACY47266.1  glycosidase PH1107-related protein [Rhodothermus marinus DSM 4252],<br>"cazy 345111470 gb AEN72302.1  glycosidase related protein [Rhodothermus marinus SG0.5JP17-172]"]                                                                                                                                                                                                                                                                                                               |
| ["cazy 149387617 gb ABN67904.2  glycosidase [Scheffersomyces stipitis CBS 6054]"]                                                                                                                                                                                                                                                                                                                                                                                                                                      |
| ["cazy 223645453 emb CAX40110.1  glycosyl hydrolase", "putative [Candida dubliniensis CD36]",<br>"cazy 380353874 emb CCG23386.1  hypothetical protein CORT_0D05470 [Candida orthopsilosis],<br>"cazy 354546163 emb CCE42892.1  hypothetical protein CPAR2_205350 [Candida parapsilosis],<br>"cazy AOW31291.1 hypothetical protein CAALFM_CR05750WA [Candida albicans SC5314]"]                                                                                                                                         |
| ["cazy SDH28525.1 protein of unknown function [Leifsonia sp. 197AMF],<br>"cazy SDJ09705.1 protein of unknown function [Leifsonia sp. 466MF],<br>"cazy SDJ60880.1 protein of unknown function [Leifsonia sp. 157MF],<br>"cazy SDN30956.1 protein of unknown function [Leifsonia sp. 509MF],<br>"cazy SEA91288.1 protein of unknown function [Leifsonia sp. 21MFCrub1.1],<br>"cazy SEM90351.1 protein of unknown function [Leifsonia sp. 467MF],<br>"cazy SFM34619.1 protein of unknown function [Leifsonia sp. 98AMF]"] |
| ["cazy 1029984077 gb ANF30334.1  hypothetical protein A0130_00330 [Leifsonia xyli]"]                                                                                                                                                                                                                                                                                                                                                                                                                                   |
| ["mouse4-1_GL0005498 [gene] locus=scaffold49332_1:2611:3633:+ [Complete] codon-table.11"]                                                                                                                                                                                                                                                                                                                                                                                                                              |
| ["humangutMH0257_GL0045417 [gene] locus=scaffold23966_1:17250:18269:- [Complete] codon-table.11"]                                                                                                                                                                                                                                                                                                                                                                                                                      |
| ["cazy 973720559 gb ALX65937.1  glycosylase [Microbacterium sp. XT11]"]                                                                                                                                                                                                                                                                                                                                                                                                                                                |
| ["humangutV1_CD40-0_GL0193429 [gene] locus=scaffold27959_4:5026:6036:+ [Complete] codon-table.11",<br>"cazy 757810268 dbj BAQ31053.1  putative glycoside hydrolase [Bifidobacterium scardovii JCM 12489 = DSM 13734]"]                                                                                                                                                                                                                                                                                                 |
| ["cazy 1032525890 emb SBN62434.1  Predicted glycosyl hydrolase", "GH43/DUF377 family [Curtobacterium sp. 9128]"]                                                                                                                                                                                                                                                                                                                                                                                                       |
| ["cazy ARA94161.1 glycosidase [Rhodothermaceae bacterium RA]"]                                                                                                                                                                                                                                                                                                                                                                                                                                                         |
| ["cazy AQY03092.1 glycosylase [Microbacterium foliorum]"]                                                                                                                                                                                                                                                                                                                                                                                                                                                              |
| ["cazy ATG50115.1 glycosylase [Brachybacterium sp. VM2412]"]                                                                                                                                                                                                                                                                                                                                                                                                                                                           |
| ["cazy APH46442.1 glycosylase [Microbacterium sp. 1.5R]"]                                                                                                                                                                                                                                                                                                                                                                                                                                                              |
| ["cazy AQS34659.1 hypothetical protein [uncultured bacterium]"]                                                                                                                                                                                                                                                                                                                                                                                                                                                        |
| ["cazy 229566671 gb ACQ80522.1  glycosidase PH1107-related protein [Beutenbergia cavernae DSM 12333]"]                                                                                                                                                                                                                                                                                                                                                                                                                 |
| ["humangutMH0220_GL0080902 [gene] locus=scaffold7359_33:439:1410:+ [Complete] codon-table.11"]                                                                                                                                                                                                                                                                                                                                                                                                                         |
| ["humangut340101.Vvad_PD3403 [Complete]:- codon-table.11"]                                                                                                                                                                                                                                                                                                                                                                                                                                                             |
| ["cazy SDT30597.1 Predicted glycosyl hydrolase", "GH43/DUF377 family [Microlunatus solii]"]                                                                                                                                                                                                                                                                                                                                                                                                                            |
| ["pigBHZ-5B_GL0031827 [gene] locus=scaffold140501_1:35:988:- [Complete] codon-table.11"]                                                                                                                                                                                                                                                                                                                                                                                                                               |
| ["rumen553_GL0683180_1 [gene] locus=scaffold402048_1:74:1024:- [Complete]"]                                                                                                                                                                                                                                                                                                                                                                                                                                            |
| ["humangutMH0003_GL0030005 [gene] locus=scaffold37737_2:359:1309:+ [Complete] codon-table.11"]                                                                                                                                                                                                                                                                                                                                                                                                                         |
| ["mouse4-8_GL0036406 [gene] locus=scaffold81080_1:8580:9527:- [Complete] codon-table.11"]                                                                                                                                                                                                                                                                                                                                                                                                                              |

|                                                                                                                                                                                       |
|---------------------------------------------------------------------------------------------------------------------------------------------------------------------------------------|
| ["cazygi 914700676 gb AKV88118.1  glycosylase [Microbacterium sp. CGR1]"]                                                                                                             |
| ["cazy CED90748.1 Predicted glycosylase [Actinomyces succinicurminis]"]                                                                                                               |
| ["humangut159227541-stool2_revised_scaffold19850_2_gene29414 strand:+ start:431 stop:1351 length:921 start_codon:yes stop_codon:yes gene_type:complete<br>[Complete] codon-table.11"] |
| ["cazy APX34598.1 glycosylase [Brachybacterium sp. P6-10-X1]"]                                                                                                                        |
| ["rumen555_GL0214116_1 [gene] locus=scaffold696522_5:2230:3135:+[Complete]"]                                                                                                          |
| ["cazy AQS34660.1 hypothetical protein [uncultured bacterium]"]                                                                                                                       |
| ["humangutMH0346_GL0078767 [gene] locus=scaffold75005_3:3:851:- [Lack 3'-end] codon-table.11"]                                                                                        |
| ["pigPIG-028_GL0192965 [gene] locus=scaffold117322_5:2:823:+ [Lack both ends] codon-table.11"]                                                                                        |
| ["humangutNOF010_GL0029537 [gene] locus=scaffold17487_9:5760:6572:- [Complete] codon-table.11"]                                                                                       |
| ["humangutMH0197_GL0122548 [gene] locus=scaffold137058_2:2:811:+ [Lack 5'-end] codon-table.11"]                                                                                       |
| ["pigBMZ-9B_GL0044137 [gene] locus=scaffold102243_1:74:853:- [Lack 5'-end] codon-table.11"]                                                                                           |
| ["humangutN074A_GL0016438 [gene] locus=scaffold976_1:5783:6538:+ [Complete] codon-table.11"]                                                                                          |
| ["pigPIG-028_GL0224767 [gene] locus=scaffold117322_3:3:743:+ [Lack 5'-end] codon-table.11"]                                                                                           |
| ["humangutMH0409_GL0098559 [gene] locus=scaffold9315_2:569:1300:- [Lack 5'-end] codon-table.11"]                                                                                      |
| ["humangutMH0318_GL0061353 [gene] locus=scaffold94357_2:3:713:- [Lack 3'-end] codon-table.11"]                                                                                        |
| ["mouseMC-0-1_GL0056371 [gene] locus=scaffold45214_1:1:684:- [Lack 3'-end] codon-table.11"]                                                                                           |
| ["humangutV1_UC59-0_GL0081196 [gene] locus=scaffold51068_2:1:681:+ [Lack 5'-end] codon-table.11"]                                                                                     |
| ["humangutMH0281_GL0008336 [gene] locus=scaffold27025_1:1:630:- [Lack both ends] codon-table.11"]                                                                                     |
| ["humangutMH0447_GL0179870 [gene] locus=scaffold66916_2:2:613:- [Lack 3'-end] codon-table.11"]                                                                                        |
| ["pigPIG-028_GL0070410 [gene] locus=scaffold117322_4:2:577:+ [Lack both ends] codon-table.11"]                                                                                        |
| ["mouseGroup2-4A_GL0108517 [gene] locus=scaffold91072_2:1:510:+ [Lack both ends] codon-table.11"]                                                                                     |
| ["pigPIG-015_GL0249704 [gene] locus=scaffold190176_1:3:506:- [Lack both ends] codon-table.11"]                                                                                        |
| ["pigZXZ-10B_GL0280819 [gene] locus=scaffold133522_1:1:504:- [Lack both ends] codon-table.11"]                                                                                        |
| ["pigZXZ-1B_GL0233238 [gene] locus=scaffold56240_1:2:502:+ [Lack 5'-end] codon-table.11"]                                                                                             |
| ["pigPIG_174_GL0095238 [gene] locus=scaffold190388_3:2:499:+ [Lack 5'-end] codon-table.11"]                                                                                           |
| ["humangutT2D-107A_GL0038210 [gene] locus=scaffold26835_2:2356:2832:+ [Complete] codon-table.11"]                                                                                     |
| ["humangutO2_UC47-1_GL0100437 [gene] locus=scaffold29550_4:1017:1484:- [Lack 5'-end] codon-table.11"]                                                                                 |
| ["humangutV1_UC55-4_GL0013856 [gene] locus=scaffold83934_1:38518:38973:+ [Complete] codon-table.11"]                                                                                  |
| ["rumen100058_GL0865693_1 [gene] locus=scaffold2253014_2:368:802:+[Lack 3'-end]"]                                                                                                     |
| ["rumen2009040_GL0847873_1 [gene] locus=scaffold1230346_2:212:610:+[Lack 3'-end]";                                                                                                    |
| "rumen7049_GL0372540_1 [gene] locus=scaffold719587_1:245:643:+[Lack 3'-end]"]                                                                                                         |
| ["cazygi 297144786 gb ADI01543.1  glycosidase-related protein [Syntrophothermus lipocalidus DSM 12680]"]                                                                              |
| ["cazygi 297145773 gb ADI02530.1  glycosidase-related protein [Syntrophothermus lipocalidus DSM 12680]"]                                                                              |
| ["cazygi 409106947 gb AFV13072.1  glycosylase-like protein [Thermaetogenium phaeum DSM 12270]"]                                                                                       |
| ["cazy CCP27154.1 Glycosidase related protein [Tepidanaerobacter acetatoydians Re1],                                                                                                  |
| "cazygi 332697821 gb AEE92278.1  glycosidase related protein [Tepidanaerobacter acetatoydians Re1]"]                                                                                  |
| ["cazygi 302200862 gb ADL08432.1  glycosidase related protein [Thermosediminibacter oceani DSM 16646]"]                                                                               |
| ["cazygi 432179615 emb CCP26588.1  Glycosidase related protein [Tepidanaerobacter acetatoydians Re1]"]                                                                                |
| ["cazygi 114338368 gb ABI69216.1  glycosylase-like protein [Syntrophomonas wolfei subsp. wolfei str. Goettingen G311]"]                                                               |
| ["cazygi 332697340 gb AEE91797.1  glycosidase related protein [Tepidanaerobacter acetatoydians Re1]"]                                                                                 |
| ["cazygi 332700025 gb AEE96966.1  glycosidase related protein [Mahella australiensis 50-1 BON]"]                                                                                      |
| ["cazy AYO32279.1 glycosidase [Thermoanaerobacteriales bacterium SK-G1]"]                                                                                                             |

|                                                                                                  |
|--------------------------------------------------------------------------------------------------|
| ["cazygi 332700567 gb AEE97508.1  glycosidase related protein [Mahella australiensis 50-1 BON]"] |
| ["humangutMH0369_GL0053907 [gene] locus=scaffold3527_4:66957:70382:- [Complete] codon-table.11"] |

## Singletons

|                                                                                                                                                                                          |
|------------------------------------------------------------------------------------------------------------------------------------------------------------------------------------------|
| ["cazy AWH84733.1 hypothetical protein HYN59_06180 [Flavobacterium sp. HYN0059]"]                                                                                                        |
| ["cazy AWI66994.1 Glycosyl hydrolase family 130", " partial [Chytridiomycota sp. NHY-2018]"]                                                                                             |
| ["cazygi 256361128 gb ACU74625.1  glycosidase PH1107-related [Catenuispora acidiphila DSM 44928]"]                                                                                       |
| ["cazygi 256362158 gb ACU75655.1  glycosidase PH1107-related [Catenuispora acidiphila DSM 44928]"]                                                                                       |
| ["cazygi 288894249 gb ADC65786.1  glycosidase PH1107-related protein [Ferroglobus placidus DSM 10642]"]                                                                                  |
| ["cazygi 311224650 gb ADP77506.1  glycosidase PH1107-related protein [Methanothermobacter fervidus DSM 2088]"]                                                                           |
| ["cazygi 395812064 gb AFN74813.1  glycosidase PH1107-related protein [Melioribacter roseus P3M-2]"]                                                                                      |
| ["cazygi 441473635 emb CCQ23389.1  Undefined function [Listeria monocytogenes N53-1]"]                                                                                                   |
| ["cazygi 575462748 gb AHG93799.1  glycosidase related protein (plasmid) [Gemmatirosa kalamazoonesis]"]                                                                                   |
| ["cazygi 663075780 gb AIE87935.1  glycosidase like protein [Fimbriimonas ginsengisoli Gsoil 348]"]                                                                                       |
| ["cazygi 686529468 gb AIQ40167.1  hypothetical protein R50912_09100 [Paenibacillus sp. FSL R5-0912]"]                                                                                    |
| ["cazygi 805357112 gb AKB37183.1  hypothetical protein MSSAC_2593 [Methanosarcina sicilliae C2J]"]                                                                                       |
| ["cazygi 910742045 dbj BAS11445.1  glycosidase PH1107-related [Arthrobacter sp. Hiyo4]"]                                                                                                 |
| ["cazygi 910746573 dbj BAS15972.1  L-arabinose transport system permease protein AraQ [Arthrobacter sp. Hiyo8]"]                                                                         |
| ["cazygi 941938696 gb ALL00674.1  putative glycosylase [Pyrodicticum delaneyi]"]                                                                                                         |
| ["cazygi 948529002 gb ALM76546.1  hypothetical protein TBCH5v1_2658 [Thermococcus barophilus]"]                                                                                          |
| ["cazygi 948529004 gb ALM76548.1  hypothetical protein TBCH5v1_2660 [Thermococcus barophilus]"]                                                                                          |
| ["cazygi 961671808 gb ALS92213.1  protein of unknown function (DUF377)", " partial [uncultured bacterium]"]                                                                              |
| ["humangut158458797-stool1_revised_C1329368_1_gene123209 strand:- start:1 stop:450 length:450 start_codon:yes stop_codon:no gene_type:incomplete [Lack 3'-end] codon-table.11"]          |
| ["humangut158479027-stool1_revised_scaffold1100_2_gene58535 strand:- start:14782 stop:15147 length:366 start_codon:no stop_codon:yes gene_type:incomplete [Lack 5'-end] codon-table.11"] |
| ["humangut158479027-stool1_revised_scaffold18864_1_gene136702 strand:+ start:2 stop:247 length:246 start_codon:no stop_codon:yes gene_type:incomplete [Lack 5'-end] codon-table.11"]     |
| ["humangut158499257-stool1_revised_C1407643_1_gene167372 strand:- start:1 stop:354 length:354 start_codon:yes stop_codon:no gene_type:incomplete [Lack 3'-end] codon-table.11"]          |
| ["humangut158802708-stool1_revised_scaffold20396_1_gene173909 strand:+ start:142 stop:570 length:429 start_codon:yes stop_codon:no gene_type:incomplete [Lack 3'-end] codon-table.11"]   |
| ["humangut159247771-stool1_revised_C639626_1_gene39863 strand:+ start:3 stop:347 length:345 start_codon:no stop_codon:yes gene_type:incomplete [Lack 5'-end] codon-table.11"]            |
| ["humangut159247771-stool1_revised_C699412_1_gene62056 strand:+ start:1102 stop:1380 length:279 start_codon:yes stop_codon:no gene_type:incomplete [Lack 3'-end] codon-table.11"]        |
| ["humangut159268001-stool1_revised_C1012689_1_gene118452 strand:+ start:1 stop:291 length:291 start_codon:no stop_codon:yes gene_type:incomplete [Lack 5'-end] codon-table.11"]          |
| ["humangut159571453-stool2_revised_scaffold24542_1_gene69618 strand:+ start:2 stop:355 length:354 start_codon:no stop_codon:yes gene_type:incomplete [Lack 5'-end] codon-table.11"]      |



|                                                                                                                                                                                        |
|----------------------------------------------------------------------------------------------------------------------------------------------------------------------------------------|
| ["humangut160400887-stool1_revised_C1333607_1_gene208705 strand:+ start:2 stop:244 length:243 start_codon:no stop_codon:yes gene_type:incomplete [Lack 5'-end] codon-table.11"]        |
| ["humangut160400887-stool1_revised_C1423142_1_gene31428 strand:+ start:3 stop:308 length:306 start_codon:no stop_codon:yes gene_type:incomplete [Lack 5'-end] codon-table.11"]         |
| ["humangut160400887-stool1_revised_scaffold13211_1_gene86925 strand:- start:227 stop:610 length:384 start_codon:no stop_codon:yes gene_type:incomplete [Lack 5'-end] codon-table.11"]  |
| ["humangut160582958-stool1_revised_C587123_1_gene4656 strand:+ start:333 stop:563 length:231 start_codon:yes stop_codon:no gene_type:incomplete [Lack 3'-end] codon-table.11"]         |
| ["humangut160765029-stool1_revised_C967610_1_gene119236 strand:- start:380 stop:520 length:141 start_codon:no stop_codon:yes gene_type:incomplete [Lack 5'-end] codon-table.11"]       |
| ["humangut508703490-stool1_revised_scaffold13815_1_gene2495 strand:+ start:2 stop:346 length:345 start_codon:no stop_codon:yes gene_type:incomplete [Lack 5'-end] codon-table.11"]     |
| ["humangut763496533-stool2_revised_C1050883_1_gene24509 strand:- start:217 stop:564 length:348 start_codon:no stop_codon:yes gene_type:incomplete [Lack 5'-end] codon-table.11"]       |
| ["humangut763496533-stool2_revised_scaffold33035_1_gene29300 strand:+ start:493 stop:792 length:300 start_codon:yes stop_codon:no gene_type:incomplete [Lack 3'-end] codon-table.11"]  |
| ["humangut764062976-stool1_revised_scaffold25949_3_gene131258 strand:+ start:3 stop:1970 length:1968 start_codon:no stop_codon:yes gene_type:incomplete [Lack 5'-end] codon-table.11"] |
| ["humangut764224817-stool1_revised_scaffold11534_1_gene7253 strand:+ start:3 stop:257 length:255 start_codon:no stop_codon:yes gene_type:incomplete [Lack 5'-end] codon-table.11"]     |
| ["humangut764447348-stool1_revised_C417161_1_gene108174 strand:- start:2 stop:355 length:354 start_codon:yes stop_codon:no gene_type:incomplete [Lack 3'-end] codon-table.11"]         |
| ["humangut764588959-stool1_revised_C721118_1_gene46911 strand:- start:189 stop:545 length:357 start_codon:no stop_codon:yes gene_type:incomplete [Lack 5'-end] codon-table.11"]        |
| ["humangut764588959-stool1_revised_scaffold32622_1_gene138004 strand:- start:2 stop:340 length:339 start_codon:yes stop_codon:no gene_type:incomplete [Lack 3'-end] codon-table.11"]   |
| ["humangut809635352-stool1_revised_scaffold12936_1_gene102208 strand:+ start:1 stop:144 length:144 start_codon:no stop_codon:yes gene_type:incomplete [Lack 5'-end] codon-table.11"]   |
| ["humangutDOF007_GL0046180 [gene] locus=scaffold3151_10:1097:1441:+ [Lack 3'-end] codon-table.11"]                                                                                     |
| ["humangutDOF008_GL0049325 [gene] locus=scaffold5558_25:2:304:+ [Lack 5'-end] codon-table.11"]                                                                                         |
| ["humangutDOM012_GL0002710 [gene] locus=scaffold5297_3:985:1194:- [Lack 5'-end] codon-table.11"]                                                                                       |
| ["humangutDOM012_GL0017444 [gene] locus=scaffold24111_2:322:624:- [Complete] codon-table.11"]                                                                                          |
| ["humangutDOM025_GL0036051 [gene] locus=scaffold18744_1:1:867:- [Lack both ends] codon-table.11"]                                                                                      |
| ["humangutED11A_GL0002445 [gene] locus=scaffold18900_1:676:852:- [Lack 5'-end] codon-table.11"]                                                                                        |
| ["humangutHT14A_GL0076475 [gene] locus=scaffold20905_1:1:345:+ [Lack 5'-end] codon-table.11",<br>"rumen554_GL0550693_1 [gene] locus=scaffold1139629_4:1182:1526:-[Lack 5'-end]"]       |
| ["humangutMH0010_GL0040027 [gene] locus=scaffold12470_4:1147:1725:+ [Complete] codon-table.11"]                                                                                        |
| ["humangutMH0014_GL0001393 [gene] locus=C1167635_1:786:1820:+ [Complete] codon-table.11"]                                                                                              |
| ["humangutMH0016_GL0077462 [gene] locus=scaffold6606_1:577:930:- [Lack 5'-end] codon-table.11"]                                                                                        |
| ["humangutMH0024_GL0009042 [gene] locus=C684765_1:908:1084:- [Lack 5'-end] codon-table.11"]                                                                                            |
| ["humangutMH0046_GL0044530 [gene] locus=scaffold6969_15:676:891:- [Lack 5'-end] codon-table.11"]                                                                                       |
| ["humangutMH0055_GL0027772 [gene] locus=scaffold12333_3:922:1296:+ [Lack 3'-end] codon-table.11"]                                                                                      |
| ["humangutMH0072_GL0008226 [gene] locus=scaffold2833_3:873:1034:+ [Lack 3'-end] codon-table.11"]                                                                                       |

|                                                                                                                                                                                                   |
|---------------------------------------------------------------------------------------------------------------------------------------------------------------------------------------------------|
| ["humangutMH0077_GL0057517 [gene] locus=C1128509_1:1122:1352:+ [Lack 3'-end] codon-table.11"]                                                                                                     |
| ["humangutMH0098_GL0007885 [gene] locus=scaffold20250_3:379:690:- [Lack 5'-end] codon-table.11"]                                                                                                  |
| ["humangutMH0121_GL0011395 [gene] locus=scaffold70_1:305:634:+ [Lack 3'-end] codon-table.11"]                                                                                                     |
| ["humangutMH0123_GL0022321 [gene] locus=scaffold41860_5:1206:1553:+ [Lack 3'-end] codon-table.11"]                                                                                                |
| ["humangutMH0128_GL0082326 [gene] locus=scaffold20314_9:3:368:- [Lack 3'-end] codon-table.11"]                                                                                                    |
| ["humangutMH0143_GL0081219 [gene] locus=scaffold4032_2:202:567:+ [Lack 3'-end] codon-table.11"]                                                                                                   |
| ["humangutMH0143_GL0124264 [gene] locus=scaffold4032_5:2:364:+ [Lack 5'-end] codon-table.11"]                                                                                                     |
| ["humangutMH0168_GL0057763 [gene] locus=scaffold3169_3:335:559:- [Lack 5'-end] codon-table.11"]                                                                                                   |
| ["humangutMH0168_GL0103270 [gene] locus=scaffold113052_1:1:369:- [Lack 3'-end] codon-table.11"]                                                                                                   |
| ["humangutMH0189_GL0168280 [gene] locus=scaffold38117_1:364:708:+ [Lack 3'-end] codon-table.11",<br>"rumen7049_GL2839234_1 [gene] locus=C52385712_1:3:347:-[Lack 3'-end]"]                        |
| ["humangutMH0196_GL0117325 [gene] locus=scaffold58671_1:675:1052:+ [Lack 3'-end] codon-table.11"]                                                                                                 |
| ["humangutMH0197_GL0038811 [gene] locus=scaffold62716_1:2:382:- [Lack 3'-end] codon-table.11"]                                                                                                    |
| ["humangutMH0197_GL0107836 [gene] locus=scaffold92544_4:3:197:+ [Lack 5'-end] codon-table.11"]                                                                                                    |
| ["humangutMH0197_GL0182739 [gene] locus=scaffold92544_2:700:915:+ [Lack 3'-end] codon-table.11"]                                                                                                  |
| ["humangutMH0229_GL0028465 [gene] locus=scaffold41588_5:2:295:+ [Lack 5'-end] codon-table.11"]                                                                                                    |
| ["humangutMH0233_GL0074858 [gene] locus=scaffold20373_4:3:365:+ [Lack 5'-end] codon-table.11",<br>"humangutMH0419_GL0062472 [gene] locus=scaffold36938_7:153:515:- [Lack 5'-end] codon-table.11"] |
| ["humangutMH0233_GL0123407 [gene] locus=scaffold46519_5:124:747:+ [Lack 3'-end] codon-table.11"]                                                                                                  |
| ["humangutMH0243_GL0001251 [gene] locus=scaffold15770_16:1:267:- [Lack 3'-end] codon-table.11"]                                                                                                   |
| ["humangutMH0243_GL0017421 [gene] locus=scaffold15249_9:2:349:- [Lack 3'-end] codon-table.11"]                                                                                                    |
| ["humangutMH0245_GL0009488 [gene] locus=scaffold19950_15:9189:9509:- [Lack 5'-end] codon-table.11",<br>"rumen0081_GL0391993_1 [gene] locus=scaffold938228_1:1:321:+[Lack 5'-end]"]                |
| ["humangutMH0250_GL0085360 [gene] locus=scaffold5947_4:438:698:+ [Lack 3'-end] codon-table.11"]                                                                                                   |
| ["humangutMH0251_GL0101220 [gene] locus=scaffold50228_1:3:221:+ [Lack 5'-end] codon-table.11"]                                                                                                    |
| ["humangutMH0257_GL0166458 [gene] locus=scaffold38642_1:1:516:- [Lack both ends] codon-table.11"]                                                                                                 |
| ["humangutMH0260_GL0057638 [gene] locus=scaffold85160_13:1670:2227:+ [Lack 3'-end] codon-table.11"]                                                                                               |
| ["humangutMH0260_GL0139297 [gene] locus=scaffold87671_2:2:355:+ [Lack 5'-end] codon-table.11"]                                                                                                    |
| ["humangutMH0260_GL0141136 [gene] locus=scaffold35061_1:342:668:+ [Lack 3'-end] codon-table.11"]                                                                                                  |
| ["humangutMH0262_GL0133865 [gene] locus=scaffold12319_12:315:683:+ [Lack 3'-end] codon-table.11"]                                                                                                 |
| ["humangutMH0276_GL0235251 [gene] locus=scaffold127463_2:1:486:- [Lack 3'-end] codon-table.11"]                                                                                                   |
| ["humangutMH0286_GL0158074 [gene] locus=scaffold35417_3:1:318:+ [Lack 5'-end] codon-table.11"]                                                                                                    |
| ["humangutMH0293_GL0011214 [gene] locus=scaffold75357_2:3:242:+ [Lack 5'-end] codon-table.11"]                                                                                                    |
| ["humangutMH0303_GL0015638 [gene] locus=scaffold17511_14:314:628:- [Lack 5'-end] codon-table.11"]                                                                                                 |
| ["humangutMH0303_GL0051007 [gene] locus=scaffold35829_13:244:636:- [Lack 5'-end] codon-table.11"]                                                                                                 |
| ["humangutMH0303_GL0160402 [gene] locus=scaffold17511_16:2:517:- [Lack 3'-end] codon-table.11"]                                                                                                   |
| ["humangutMH0318_GL0061354 [gene] locus=scaffold94357_2:736:963:- [Lack 5'-end] codon-table.11"]                                                                                                  |
| ["humangutMH0318_GL0139096 [gene] locus=scaffold65132_1:170:538:+ [Lack 3'-end] codon-table.11"]                                                                                                  |
| ["humangutMH0318_GL0202644 [gene] locus=scaffold63258_1:3:449:+ [Lack 5'-end] codon-table.11"]                                                                                                    |
| ["humangutMH0318_GL0207266 [gene] locus=scaffold14436_8:2:265:+ [Lack 5'-end] codon-table.11"]                                                                                                    |
| ["humangutMH0329_GL0021822 [gene] locus=scaffold126498_1:2:628:+ [Lack both ends] codon-table.11"]                                                                                                |
| ["humangutMH0329_GL0082370 [gene] locus=scaffold111403_3:3:599:- [Lack 3'-end] codon-table.11"]                                                                                                   |
| ["humangutMH0329_GL0138621 [gene] locus=scaffold112733_7:2946:3245:+ [Complete] codon-table.11"]                                                                                                  |

|                                                                                                                                                                                  |
|----------------------------------------------------------------------------------------------------------------------------------------------------------------------------------|
| ["humangutMH0329_GL0149676 [gene] locus=scaffold113332_2:481:819:+ [Lack 3'-end] codon-table.11"]                                                                                |
| ["humangutMH0346_GL0110027 [gene] locus=scaffold89974_1:572:1072:+ [Lack 3'-end] codon-table.11"]                                                                                |
| ["humangutMH0346_GL0162467 [gene] locus=scaffold7702_18:670:897:- [Lack 5'-end] codon-table.11"]                                                                                 |
| ["humangutMH0357_GL0064342 [gene] locus=scaffold81132_2:187:504:+ [Lack 3'-end] codon-table.11"]                                                                                 |
| ["humangutMH0357_GL0140850 [gene] locus=scaffold4369_2:3:269:+ [Lack 5'-end] codon-table.11"]                                                                                    |
| ["humangutMH0368_GL0068373 [gene] locus=scaffold10102_6:475:855:- [Lack 5'-end] codon-table.11"]                                                                                 |
| ["humangutMH0369_GL0047535 [gene] locus=scaffold9102_1:250:777:+ [Lack 3'-end] codon-table.11"]                                                                                  |
| ["humangutMH0382_GL0027958 [gene] locus=scaffold35103_2:2:232:+ [Lack 5'-end] codon-table.11",<br>"rumen100058_GL3102479_1 [gene] locus=scaffold2198624_3:2:232:+[Lack 5'-end]"] |
| ["humangutMH0385_GL0104250 [gene] locus=scaffold749_13:1209:1442:- [Lack 5'-end] codon-table.11"]                                                                                |
| ["humangutMH0385_GL0132644 [gene] locus=scaffold53331_2:210:1139:- [Complete] codon-table.11"]                                                                                   |
| ["humangutMH0389_GL0107452 [gene] locus=scaffold109432_4:19720:19914:+ [Complete] codon-table.11"]                                                                               |
| ["humangutMH0389_GL0171050 [gene] locus=scaffold47280_6:204:575:+ [Lack 3'-end] codon-table.11"]                                                                                 |
| ["humangutMH0393_GL0009257 [gene] locus=scaffold37165_5:629:892:- [Lack 5'-end] codon-table.11"]                                                                                 |
| ["humangutMH0398_GL0051839 [gene] locus=scaffold105642_5:2047:2310:- [Lack 5'-end] codon-table.11"]                                                                              |
| ["humangutMH0399_GL0082759 [gene] locus=scaffold58178_1:1:1032:+ [Lack 5'-end] codon-table.11"]                                                                                  |
| ["humangutMH0403_GL0206053 [gene] locus=scaffold84639_2:1:243:+ [Lack 5'-end] codon-table.11"]                                                                                   |
| ["humangutMH0404_GL0066200 [gene] locus=scaffold3587_12:3:341:+ [Lack 5'-end] codon-table.11"]                                                                                   |
| ["humangutMH0411_GL0081080 [gene] locus=scaffold53319_5:3:443:- [Lack 3'-end] codon-table.11"]                                                                                   |
| ["humangutMH0411_GL0204994 [gene] locus=scaffold53319_3:414:707:- [Lack 5'-end] codon-table.11"]                                                                                 |
| ["humangutMH0412_GL0016753 [gene] locus=scaffold136420_1:1:192:+ [Lack 5'-end] codon-table.11"]                                                                                  |
| ["humangutMH0412_GL0070194 [gene] locus=scaffold134926_1:1:318:- [Lack 3'-end] codon-table.11"]                                                                                  |
| ["humangutMH0415_GL0122360 [gene] locus=scaffold36551_3:881:1219:+ [Lack 3'-end] codon-table.11"]                                                                                |
| ["humangutMH0419_GL0186502 [gene] locus=scaffold36938_4:1:384:- [Lack 3'-end] codon-table.11"]                                                                                   |
| ["humangutMH0426_GL0166470 [gene] locus=scaffold4251_4:3:458:- [Lack 3'-end] codon-table.11"]                                                                                    |
| ["humangutMH0436_GL0106385 [gene] locus=scaffold23900_2:1:240:- [Lack 3'-end] codon-table.11"]                                                                                   |
| ["humangutMH0437_GL0089863 [gene] locus=scaffold41065_3:1248:1613:+ [Lack 3'-end] codon-table.11"]                                                                               |
| ["humangutMH0437_GL0259147 [gene] locus=scaffold34459_6:24138:26636:+ [Complete] codon-table.11"]                                                                                |
| ["humangutMH0439_GL0237845 [gene] locus=scaffold70555_6:1:318:- [Lack 3'-end] codon-table.11"]                                                                                   |
| ["humangutMH0442_GL0069732 [gene] locus=scaffold131865_2:248:592:+ [Lack 3'-end] codon-table.11"]                                                                                |
| ["humangutMH0445_GL0174357 [gene] locus=scaffold92326_1:147:512:- [Lack 5'-end] codon-table.11"]                                                                                 |
| ["humangutMH0447_GL0051147 [gene] locus=scaffold66916_1:873:1235:- [Lack 5'-end] codon-table.11"]                                                                                |
| ["humangutMH0447_GL0078042 [gene] locus=scaffold63630_3:608:1192:- [Complete] codon-table.11"]                                                                                   |
| ["humangutMH0447_GL0220358 [gene] locus=scaffold83071_3:1:240:+ [Lack 5'-end] codon-table.11"]                                                                                   |
| ["humangutMH0447_GL0236530 [gene] locus=scaffold29789_17:2:226:- [Lack 3'-end] codon-table.11"]                                                                                  |
| ["humangutMH0447_GL0236531 [gene] locus=scaffold29789_17:216:776:- [Complete] codon-table.11"]                                                                                   |
| ["humangutMH0454_GL0021889 [gene] locus=scaffold4028_4:230:589:- [Lack 5'-end] codon-table.11"]                                                                                  |
| ["humangutMH0457_GL0039335 [gene] locus=scaffold43943_10:2:289:+ [Lack 5'-end] codon-table.11"]                                                                                  |
| ["humangutMH0457_GL0154021 [gene] locus=scaffold178004_6:1:1287:+ [Lack 5'-end] codon-table.11"]                                                                                 |
| ["humangutN020A_GL0010815 [gene] locus=C849507_1:3:425:- [Lack 3'-end] codon-table.11"]                                                                                          |
| ["humangutN038A_GL0084844 [gene] locus=scaffold49879_2:1:282:- [Lack 3'-end] codon-table.11"]                                                                                    |
| ["humangutNLF007_GL0037795 [gene] locus=scaffold12704_35:333:578:- [Lack 5'-end] codon-table.11"]                                                                                |
| ["humangutNLM010_GL0060849 [gene] locus=scaffold6721_1:3:347:- [Lack 3'-end] codon-table.11"]                                                                                    |

|                                                                                                                                                                                                                                                                                |
|--------------------------------------------------------------------------------------------------------------------------------------------------------------------------------------------------------------------------------------------------------------------------------|
| ["humangutNLM024_GL0004802 [gene] locus=scaffold1090_2:1:276:- [Lack 3'-end] codon-table.11",<br>"rumen552_GL1342428_1 [gene] locus=C21370228_1:329:604:+[Lack 3'-end]"]                                                                                                       |
| ["humangutNOF008_GL0005032 [gene] locus=scaffold40245_1:2903:3022:- [Lack 5'-end] codon-table.11"]                                                                                                                                                                             |
| ["humangutNOM023_GL0012275 [gene] locus=scaffold8794_8:1:324:+ [Lack 5'-end] codon-table.11"]                                                                                                                                                                                  |
| ["humangutNOM026_GL0020969 [gene] locus=scaffold6339_15:2:511:- [Lack both ends] codon-table.11"]                                                                                                                                                                              |
| ["humangutO2.UC14-1_GL0075951 [gene] locus=scaffold10916_1:2:145:+ [Lack 5'-end] codon-table.11"]                                                                                                                                                                              |
| ["humangutO2.UC18-2_GL0006426 [gene] locus=scaffold89177_7:617:913:- [Lack 5'-end] codon-table.11"]                                                                                                                                                                            |
| ["humangutO2.UC18-2_GL0143529 [gene] locus=scaffold89177_9:1216:1545:- [Lack 5'-end] codon-table.11"]                                                                                                                                                                          |
| ["humangutO2.UC29-1_GL0030376 [gene] locus=scaffold18749_4:2146:2517:+ [Complete] codon-table.11"]                                                                                                                                                                             |
| ["humangutO2.UC3-2_GL0091900 [gene] locus=scaffold18465_13:2:166:+ [Lack 5'-end] codon-table.11"]                                                                                                                                                                              |
| ["humangutO2.UC4-2_GL0090005 [gene] locus=scaffold56944_3:857:1201:- [Lack 5'-end] codon-table.11"]                                                                                                                                                                            |
| ["humangutO2.UC40-1_GL0224539 [gene] locus=scaffold141934_3:537:728:- [Lack 5'-end] codon-table.11"]                                                                                                                                                                           |
| ["humangutO2.UC44-2_GL0263974 [gene] locus=scaffold37118_14:3:200:+ [Lack 5'-end] codon-table.11"]                                                                                                                                                                             |
| ["humangutO2.UC47-1_GL0175948 [gene] locus=scaffold31155_5:2:343:+ [Lack 5'-end] codon-table.11"]                                                                                                                                                                              |
| ["humangutO2.UC48-1_GL0066184 [gene] locus=scaffold21500_4:1:450:- [Lack 3'-end] codon-table.11"]                                                                                                                                                                              |
| ["humangutO2.UC48-1_GL0146576 [gene] locus=scaffold45801_4:3:140:+ [Lack 5'-end] codon-table.11"]                                                                                                                                                                              |
| ["humangutO2.UC50-2_GL0004976 [gene] locus=scaffold96327_2:325:573:- [Lack 5'-end] codon-table.11"]                                                                                                                                                                            |
| ["humangutO2.UC53-0_GL0142653 [gene] locus=scaffold126471_1:2:493:+ [Lack 5'-end] codon-table.11"]                                                                                                                                                                             |
| ["humangutO2.UC53-0_GL0249722 [gene] locus=scaffold129671_3:228:545:+ [Lack 3'-end] codon-table.11"]                                                                                                                                                                           |
| ["humangutO2.UC58-0_GL0006881 [gene] locus=scaffold101956_4:2:553:+ [Lack 5'-end] codon-table.11"]                                                                                                                                                                             |
| ["humangutO2.UC58-0_GL0106275 [gene] locus=scaffold101956_3:1074:1481:+ [Lack 3'-end] codon-table.11"]                                                                                                                                                                         |
| ["humangutO2.UC58-0_GL0110180 [gene] locus=scaffold45318_2:577:825:- [Lack 5'-end] codon-table.11"]                                                                                                                                                                            |
| ["humangutSZEY-10A_GL0038183 [gene] locus=scaffold20329_1:3:218:+ [Lack 5'-end] codon-table.11",<br>"rumen552_GL0949102_1 [gene] locus=scaffold370500_1:618:833:-[Lack 5'-end]",<br>"rumen2009040_GL2301131_1 [gene] locus=scaffold1554320_1:446:661:-[Lack 5'-end]"]          |
| ["humangutSZEY-22A_GL0033591 [gene] locus=scaffold5290_2:3:209:- [Lack 3'-end] codon-table.11"]                                                                                                                                                                                |
| ["humangutSZEY-62A_GL0089677 [gene] locus=scaffold78306_1:1:522:+ [Lack both ends] codon-table.11"]                                                                                                                                                                            |
| ["humangutT2D-108A_GL0017687 [gene] locus=scaffold86502_1:97:564:- [Lack 5'-end] codon-table.11"]                                                                                                                                                                              |
| ["humangutT2D-118A_GL0042792 [gene] locus=C396885_1:1:177:+ [Lack 5'-end] codon-table.11"]                                                                                                                                                                                     |
| ["humangutT2D-177A_GL0047681 [gene] locus=scaffold4254_3:16671:17177:+ [Lack 3'-end] codon-table.11"]                                                                                                                                                                          |
| ["humangutT2D-203A_GL0056743 [gene] locus=scaffold78733_1_2:3:212:+ [Lack 5'-end] codon-table.11"]                                                                                                                                                                             |
| ["humangutT2D-34A_GL0107992 [gene] locus=scaffold9114_7:3:401:- [Lack 3'-end] codon-table.11"]                                                                                                                                                                                 |
| ["humangutT2D-48A_GL0030912 [gene] locus=scaffold15415_8:1:348:+ [Lack 5'-end] codon-table.11"]                                                                                                                                                                                |
| ["humangutT2D-51A_GL0083700 [gene] locus=scaffold82597_2:2:409:- [Lack 3'-end] codon-table.11"]                                                                                                                                                                                |
| ["humangutV1.CD43-0_GL0114439 [gene] locus=scaffold11857_7:3:188:+ [Lack 5'-end] codon-table.11"]                                                                                                                                                                              |
| ["humangutV1.CD51-0_GL0063834 [gene] locus=scaffold13102_6:1:552:- [Lack both ends] codon-table.11"]                                                                                                                                                                           |
| ["humangutV1.CD6-0-PT_GL0094869 [gene] locus=scaffold73099_1:1:333:- [Lack 3'-end] codon-table.11"]                                                                                                                                                                            |
| ["humangutV1.FI14_GL0207273 [gene] locus=scaffold65910_4:1:234:+ [Lack 5'-end] codon-table.11"]                                                                                                                                                                                |
| ["humangutV1.FI16_GL0209695 [gene] locus=C1703249_1:3:326:+ [Lack 5'-end] codon-table.11"]                                                                                                                                                                                     |
| ["humangutV1.UC11-5_GL0005806 [gene] locus=scaffold5864_3:3:254:+ [Lack 5'-end] codon-table.11",<br>"mouseG1-5A_GL0120335 [gene] locus=scaffold84034_10:1:252:+ [Lack 5'-end] codon-table.11",<br>"rumen555_GL0927358_1 [gene] locus=scaffold603547_4:491:742:-[Lack 5'-end]"] |
| ["humangutV1.UC11-5_GL0089600 [gene] locus=scaffold45835_1:82:504:- [Lack 5'-end] codon-table.11"]                                                                                                                                                                             |

|                                                                                                                                                                                                |
|------------------------------------------------------------------------------------------------------------------------------------------------------------------------------------------------|
| ["humangutV1_UC41-0_GL0015005 [gene] locus=scaffold57083_3:712:993:- [Lack 5'-end] codon-table.11"]                                                                                            |
| ["humangutV1_UC41-0_GL0113065 [gene] locus=scaffold57083_5:1:294:- [Lack 3'-end] codon-table.11"]                                                                                              |
| ["humangutV1_UC49-1_GL0105266 [gene] locus=scaffold56477_1:176:547:- [Lack 5'-end] codon-table.11",<br>"rumen100058_GL1141971_1 [gene] locus=scaffold2010358_2:1:372:+ [Lack 5'-end]"]         |
| ["humangutV1_UC49-1_GL0196061 [gene] locus=scaffold56477_3:3:344:- [Lack 3'-end] codon-table.11",<br>"pigPIG-035_GL0055410 [gene] locus=scaffold86648_3:1:342:- [Lack 3'-end] codon-table.11"] |
| ["humangutV1_UC52-0_GL0033844 [gene] locus=scaffold38680_1:3:275:+ [Lack 5'-end] codon-table.11"]                                                                                              |
| ["humangutV1_UC52-0_GL0076910 [gene] locus=scaffold58297_4:724:1050:- [Lack 5'-end] codon-table.11"]                                                                                           |
| ["humangutV1_UC52-1_GL0217357 [gene] locus=scaffold71732_5:3:323:- [Lack 3'-end] codon-table.11"]                                                                                              |
| ["humangutV1_UC58-0_GL0010265 [gene] locus=C1344929_1:2:373:- [Lack 3'-end] codon-table.11"]                                                                                                   |
| ["humangutV1_UC63-0_GL0226429 [gene] locus=scaffold90032_1:1:135:+ [Lack 5'-end] codon-table.11"]                                                                                              |
| ["humangutV1_UC64-0_GL0075621 [gene] locus=scaffold98556_3:292:516:- [Lack 5'-end] codon-table.11"]                                                                                            |
| ["mouse1-1_GL0096491 [gene] locus=scaffold3628_1:197:583:- [Lack 5'-end] codon-table.11",<br>"rumen100058_GL1762176_1 [gene] locus=C59653100_1:474:860:- [Lack 5'-end]"]                       |
| ["mouse1-1_GL0117991 [gene] locus=scaffold46637_1:1:474:+ [Lack 5'-end] codon-table.11"]                                                                                                       |
| ["mouse1-7_GL0135936 [gene] locus=scaffold5470_3:2:421:- [Lack 3'-end] codon-table.11"]                                                                                                        |
| ["mouse1A-dyr4-07_GL0070331 [gene] locus=scaffold24038_1:66:335:- [Complete] codon-table.11"]                                                                                                  |
| ["mouse29_GL0000723 [gene] locus=scaffold79796_1:3074:3502:+ [Complete] codon-table.11"]                                                                                                       |
| ["mouse2A-dyr14-07_GL0041658 [gene] locus=scaffold64604_2:3:305:- [Lack 3'-end] codon-table.11"]                                                                                               |
| ["mouse2A-dyr16-07_GL0084188 [gene] locus=scaffold27478_6:539:766:+ [Lack 3'-end] codon-table.11"]                                                                                             |
| ["mouse3-5_GL0087646 [gene] locus=scaffold51054_3:3:377:- [Lack 3'-end] codon-table.11"]                                                                                                       |
| ["mouse31_GL0041785 [gene] locus=scaffold38423_1:2:343:- [Lack 3'-end] codon-table.11"]                                                                                                        |
| ["mouse31_GL0087261 [gene] locus=scaffold9451_3:719:940:+ [Lack 3'-end] codon-table.11",<br>"rumen553_GL0862616_1 [gene] locus=scaffold105027_1:2:223:- [Lack 3'-end]"]                        |
| ["mouse4-6_GL0101804 [gene] locus=scaffold2035_6:417:704:+ [Lack 3'-end] codon-table.11"]                                                                                                      |
| ["mouse5-8_GL0019899 [gene] locus=scaffold87431_2:271:636:+ [Lack 3'-end] codon-table.11"]                                                                                                     |
| ["mouse54_GL0000607 [gene] locus=scaffold73491_1:1:270:+ [Lack 5'-end] codon-table.11"]                                                                                                        |
| ["mouse6-1_GL0059324 [gene] locus=scaffold17903_6:36:635:+ [Complete] codon-table.11"]                                                                                                         |
| ["mouse6-5_GL0028346 [gene] locus=C1005479_1:315:644:- [Lack 5'-end] codon-table.11"]                                                                                                          |
| ["mouse8_GL0140135 [gene] locus=scaffold4385_3:1391:1759:+ [Lack 3'-end] codon-table.11"]                                                                                                      |
| ["mouse8-6_GL0006984 [gene] locus=scaffold62741_3:3:650:+ [Lack both ends] codon-table.11"]                                                                                                    |
| ["mouseG1-5A_GL0072854 [gene] locus=scaffold45912_7:1:324:+ [Lack 5'-end] codon-table.11"]                                                                                                     |
| ["mouseG1-5A_GL0120334 [gene] locus=scaffold84034_7:431:763:+ [Lack 3'-end] codon-table.11"]                                                                                                   |
| ["mouseGroup2-3A_GL0026299 [gene] locus=scaffold9194_6:843:1259:- [Lack 5'-end] codon-table.11"]                                                                                               |
| ["mouseGroup2-6A_GL0092520 [gene] locus=scaffold78815_3:370:654:- [Lack 5'-end] codon-table.11"]                                                                                               |
| ["mouseGroup2-7A_GL0056368 [gene] locus=scaffold30847_2:444:593:- [Lack 5'-end] codon-table.11"]                                                                                               |
| ["mouseGroup2-7A_GL0123938 [gene] locus=scaffold75360_2:198:527:- [Lack 5'-end] codon-table.11"]                                                                                               |
| ["mouseGroup2-8A_GL0028086 [gene] locus=scaffold15469_9:3:557:+ [Lack 5'-end] codon-table.11"]                                                                                                 |
| ["mouseGroup2-8A_GL0143788 [gene] locus=scaffold118207_6:544:834:+ [Complete] codon-table.11"]                                                                                                 |
| ["mouseMC-0-1_GL0090641 [gene] locus=scaffold79734_1:411:653:- [Lack 5'-end] codon-table.11"]                                                                                                  |
| ["mouseMC-6-1_GL0109569 [gene] locus=scaffold75917_2:1644:1898:+ [Lack 3'-end] codon-table.11"]                                                                                                |
| ["mouseMC-6-2_GL0023171 [gene] locus=scaffold13217_1:478:747:- [Lack 5'-end] codon-table.11"]                                                                                                  |
| ["mouseMC-6-4_GL0116751 [gene] locus=scaffold82976_1:2:316:+ [Lack 5'-end] codon-table.11"]                                                                                                    |

|                                                                                                                                                                                                                                                        |
|--------------------------------------------------------------------------------------------------------------------------------------------------------------------------------------------------------------------------------------------------------|
| ["mouseMH-6-4_GL0057792 [gene] locus=scaffold29094_5:789:1085:+ [Lack 3'-end] codon-table.11"]                                                                                                                                                         |
| ["mouseMH-6-5_GL0187250 [gene] locus=C1421343_1:1:360:+ [Lack 5'-end] codon-table.11"]                                                                                                                                                                 |
| ["mouseS-Fe12_GL0047612 [gene] locus=scaffold96729_4:2:394:+ [Lack 5'-end] codon-table.11"]                                                                                                                                                            |
| ["mouseS-Fe20_GL0143757 [gene] locus=scaffold40175_6:2563:3003:- [Complete] codon-table.11"]                                                                                                                                                           |
| ["pigBHZ-2B_GL0081036 [gene] locus=scaffold158413_1:595:804:- [Lack 5'-end] codon-table.11"]                                                                                                                                                           |
| ["pigBHZ-2B_GL0184861 [gene] locus=C1791472_1:181:501:+ [Lack 3'-end] codon-table.11"]                                                                                                                                                                 |
| ["pigBMZ-11B_GL0030146 [gene] locus=C730619_1:2:388:+ [Lack 5'-end] codon-table.11"]                                                                                                                                                                   |
| ["pigBMZ-3B_GL0023917 [gene] locus=scaffold31904_2:2:400:+ [Lack 5'-end] codon-table.11",<br>"rumen553_GL0697729_1 [gene] locus=scaffold294515_1:3:401:+[Lack 5'-end]",<br>"rumen3042_GL2826746_1 [gene] locus=scaffold613841_8:2:400:+[Lack 5'-end]"] |
| ["pigDB-510B_GL0107434 [gene] locus=scaffold13970_4:144:503:+ [Lack 3'-end] codon-table.11",<br>"rumen3042_GL1813635_1 [gene] locus=scaffold1263564_1:3:362:-[Lack 3'-end]"]                                                                           |
| ["pigDB-511B_GL0113845 [gene] locus=scaffold143693_1:214:594:+ [Lack 3'-end] codon-table.11"]                                                                                                                                                          |
| ["pigDB-515B_GL0054726 [gene] locus=scaffold16049_1:3:374:+ [Lack 5'-end] codon-table.11"]                                                                                                                                                             |
| ["pigDB-537B_GL0163431 [gene] locus=scaffold101887_1:414:515:- [Lack 5'-end] codon-table.11"]                                                                                                                                                          |
| ["pigEYZ-120B_GL0206302 [gene] locus=scaffold237029_2:664:1104:+ [Lack 3'-end] codon-table.11"]                                                                                                                                                        |
| ["pigEYZ-120B_GL0294049 [gene] locus=C2860800_1:1:333:+ [Lack 5'-end] codon-table.11"]                                                                                                                                                                 |
| ["pigEYZ-120B_GL0321485 [gene] locus=scaffold14870_2:605:1066:+ [Lack 3'-end] codon-table.11"]                                                                                                                                                         |
| ["pigEYZ-160B_GL0065439 [gene] locus=scaffold127538_2:720:986:- [Lack 5'-end] codon-table.11"]                                                                                                                                                         |
| ["pigEYZ-183B_GL0093119 [gene] locus=C1902746_1:3:254:+ [Lack 5'-end] codon-table.11",<br>"rumen554_GL1357027_1 [gene] locus=scaffold2116913_3:2:253:+[Lack 5'-end]"]                                                                                  |
| ["pigEYZ-254B_GL0138696 [gene] locus=scaffold130898_3:2:316:- [Lack 3'-end] codon-table.11"]                                                                                                                                                           |
| ["pigEYZ-468B_GL0121204 [gene] locus=scaffold111554_2:202:528:+ [Lack 3'-end] codon-table.11"]                                                                                                                                                         |
| ["pigEYZ-566B_GL0058282 [gene] locus=scaffold23378_1:7685:8092:- [Lack 5'-end] codon-table.11",<br>"rumen554_GL1394829_1 [gene] locus=scaffold115438_7:2:409:+[Lack 5'-end]"]                                                                          |
| ["pigEYZ-652B_GL0098387 [gene] locus=C2233085_1:299:505:- [Lack 5'-end] codon-table.11"]                                                                                                                                                               |
| ["pigEYZ-652B_GL0150164 [gene] locus=scaffold176952_1:340:543:- [Lack 5'-end] codon-table.11"]                                                                                                                                                         |
| ["pigPIG_111_GL0240613 [gene] locus=scaffold123134_4:3144:3302:- [Lack 5'-end] codon-table.11"]                                                                                                                                                        |
| ["pigPIG_113_GL0122499 [gene] locus=scaffold108127_1:865:1062:- [Lack 5'-end] codon-table.11"]                                                                                                                                                         |
| ["pigPIG_114_GL0134963 [gene] locus=scaffold102660_1:880:1083:- [Lack 5'-end] codon-table.11"]                                                                                                                                                         |
| ["pigPIG_117_GL0145015 [gene] locus=scaffold262986_2:3:164:+ [Lack 5'-end] codon-table.11"]                                                                                                                                                            |
| ["pigPIG_118_GL0313249 [gene] locus=scaffold186655_1:3:362:- [Lack 3'-end] codon-table.11"]                                                                                                                                                            |
| ["pigPIG_127_GL0070920 [gene] locus=scaffold109974_2:1:435:+ [Lack 5'-end] codon-table.11"]                                                                                                                                                            |
| ["pigPIG_132_GL0135900 [gene] locus=scaffold90934_2:1:426:- [Lack 3'-end] codon-table.11"]                                                                                                                                                             |
| ["pigPIG_133_GL0231348 [gene] locus=C2983132_1:272:571:- [Lack 5'-end] codon-table.11",<br>"rumen7049_GL2519477_1 [gene] locus=scaffold2250314_2:506:805:-[Lack 5'-end]"]                                                                              |
| ["pigPIG_138_GL0147636 [gene] locus=scaffold177634_3:1109:1411:+ [Lack 3'-end] codon-table.11"]                                                                                                                                                        |
| ["pigPIG_152_GL0249489 [gene] locus=scaffold32872_1:644:913:- [Lack 5'-end] codon-table.11"]                                                                                                                                                           |
| ["pigPIG_153_GL0162516 [gene] locus=scaffold159393_2:1:258:- [Lack 3'-end] codon-table.11"]                                                                                                                                                            |
| ["pigPIG_157_GL0088951 [gene] locus=scaffold224945_1:3:311:- [Lack 3'-end] codon-table.11"]                                                                                                                                                            |
| ["pigPIG_160_GL0213499 [gene] locus=scaffold180689_2:2:646:- [Lack both ends] codon-table.11"]                                                                                                                                                         |
| ["pigPIG_167_GL0264842 [gene] locus=scaffold193421_1:1:246:+ [Lack 5'-end] codon-table.11"]                                                                                                                                                            |
| ["pigPIG_184_GL0157776 [gene] locus=scaffold229490_1:2:301:+ [Lack 5'-end] codon-table.11"]                                                                                                                                                            |

|                                                                                                                                                                                   |
|-----------------------------------------------------------------------------------------------------------------------------------------------------------------------------------|
| ["pigPIG_186_GL0004825 [gene] locus=scaffold84602_2:1:255:+ [Lack 5'-end] codon-table.11"]                                                                                        |
| ["pigPIG_197_GL0218858 [gene] locus=scaffold215673_2:1575:1871:+ [Lack 3'-end] codon-table.11"]                                                                                   |
| ["pigPIG_208_GL0173811 [gene] locus=scaffold85110_4:2:358:+ [Lack 5'-end] codon-table.11"]                                                                                        |
| ["pigPIG-001_GL0117069 [gene] locus=scaffold122346_3:381:635:+ [Lack 3'-end] codon-table.11"]                                                                                     |
| ["pigPIG-003_GL0222283 [gene] locus=scaffold84423_1:2:424:- [Lack 3'-end] codon-table.11"]                                                                                        |
| ["pigPIG-006_GL0020498 [gene] locus=scaffold142627_2:1:360:+ [Lack 5'-end] codon-table.11"]                                                                                       |
| ["pigPIG-008_GL0016749 [gene] locus=scaffold22564_7:1:771:- [Lack both ends] codon-table.11"]                                                                                     |
| ["pigPIG-011_GL0020761 [gene] locus=scaffold113987_5:996:1316:- [Complete] codon-table.11"]                                                                                       |
| ["pigPIG-011_GL0170241 [gene] locus=scaffold104732_2:2:334:+ [Lack 5'-end] codon-table.11"]                                                                                       |
| ["pigPIG-012_GL0163005 [gene] locus=scaffold150081_4:2:130:+ [Lack 5'-end] codon-table.11",<br>"rumen100058_GL1209970_1 [gene] locus=scaffold1419203_3:1609:1737:-[Lack 5'-end]"] |
| ["pigPIG-015_GL0265072 [gene] locus=scaffold151874_1:594:878:- [Lack 5'-end] codon-table.11"]                                                                                     |
| ["pigPIG-017_GL0112081 [gene] locus=scaffold153992_2:2:184:+ [Lack 5'-end] codon-table.11"]                                                                                       |
| ["pigPIG-018_GL0111462 [gene] locus=scaffold133034_2:2:349:+ [Lack 5'-end] codon-table.11"]                                                                                       |
| ["pigPIG-018_GL0195533 [gene] locus=scaffold111815_1:1:258:+ [Lack 5'-end] codon-table.11"]                                                                                       |
| ["pigPIG-018_GL0199020 [gene] locus=scaffold112197_1:3:227:+ [Lack 5'-end] codon-table.11"]                                                                                       |
| ["pigPIG-019_GL0028926 [gene] locus=scaffold60304_1:3:299:- [Lack 3'-end] codon-table.11"]                                                                                        |
| ["pigPIG-024_GL0024416 [gene] locus=scaffold47495_8:2:241:+ [Lack 5'-end] codon-table.11"]                                                                                        |
| ["pigPIG-026_GL0092700 [gene] locus=scaffold85874_1:2:250:+ [Lack 5'-end] codon-table.11"]                                                                                        |
| ["pigPIG-028_GL0034422 [gene] locus=scaffold158936_1:3:167:+ [Lack 5'-end] codon-table.11"]                                                                                       |
| ["pigPIG-028_GL0090129 [gene] locus=scaffold31169_2:134:742:+ [Lack 3'-end] codon-table.11"]                                                                                      |
| ["pigPIG-031_GL0019289 [gene] locus=scaffold127176_2:1:372:+ [Lack 5'-end] codon-table.11"]                                                                                       |
| ["pigPIG-031_GL0041678 [gene] locus=scaffold4042_9:2030:2251:+ [Lack 3'-end] codon-table.11"]                                                                                     |
| ["pigPIG-031_GL0116372 [gene] locus=scaffold104719_3:1:183:+ [Lack 5'-end] codon-table.11"]                                                                                       |
| ["pigPIG-032_GL0055991 [gene] locus=scaffold55164_1:2:340:- [Lack 3'-end] codon-table.11"]                                                                                        |
| ["pigPIG-033_GL0076027 [gene] locus=scaffold141581_1:1:318:- [Lack 3'-end] codon-table.11"]                                                                                       |
| ["pigPIG-033_GL0130815 [gene] locus=scaffold105326_1:3:224:+ [Lack 5'-end] codon-table.11",<br>"rumen554_GL2776972_1 [gene] locus=scaffold1334142_4:399:620:-[Lack 5'-end]"]      |
| ["pigPIG-033_GL0147033 [gene] locus=C1668203_1:641:904:+ [Lack 3'-end] codon-table.11"]                                                                                           |
| ["pigPIG-034_GL0023999 [gene] locus=scaffold14305_4:1:369:+ [Lack 5'-end] codon-table.11"]                                                                                        |
| ["pigPIG-034_GL0176454 [gene] locus=scaffold64564_1:3:389:- [Lack 3'-end] codon-table.11"]                                                                                        |
| ["pigPIG-035_GL0022304 [gene] locus=scaffold79779_2:646:996:+ [Lack 3'-end] codon-table.11"]                                                                                      |
| ["pigPIG-035_GL0080528 [gene] locus=scaffold100050_2:3:326:- [Lack 3'-end] codon-table.11"]                                                                                       |
| ["pigPIG-035_GL0145693 [gene] locus=scaffold86648_8:2:337:- [Lack 3'-end] codon-table.11"]                                                                                        |
| ["pigPIG-035_GL0158671 [gene] locus=scaffold57862_2:1:261:+ [Lack 5'-end] codon-table.11"]                                                                                        |
| ["pigPIG-036_GL0072983 [gene] locus=C1974901_1:38:415:- [Complete] codon-table.11"]                                                                                               |
| ["pigPIG-038_GL0106270 [gene] locus=scaffold24360_3:1177:1434:- [Lack 5'-end] codon-table.11"]                                                                                    |
| ["pigPIG-041_GL0102979 [gene] locus=scaffold68019_2:13259:13489:- [Complete] codon-table.11"]                                                                                     |
| ["pigPIG-041_GL0102980 [gene] locus=scaffold68019_2:13470:13904:- [Complete] codon-table.11"]                                                                                     |
| ["pigPIG-044_GL0196258 [gene] locus=scaffold21536_4:3:305:+ [Lack 5'-end] codon-table.11"]                                                                                        |
| ["pigPIG-046_GL0080358 [gene] locus=scaffold13760_5:3:389:- [Lack 3'-end] codon-table.11"]                                                                                        |
| ["pigPIG-046_GL0102775 [gene] locus=scaffold132270_2:324:650:+ [Lack 3'-end] codon-table.11"]                                                                                     |
| ["pigPIG-046_GL0108704 [gene] locus=scaffold120671_1:1:135:+ [Lack 5'-end] codon-table.11"]                                                                                       |

|                                                                                                                                                                   |
|-------------------------------------------------------------------------------------------------------------------------------------------------------------------|
| ["pigPIG-046_GL0223004 [gene] locus=scaffold12098_1:1:366:+ [Lack 5'-end] codon-table.11"]                                                                        |
| ["pigPIG-063_GL0161198 [gene] locus=scaffold59817_4:603:791:- [Lack 5'-end] codon-table.11"]                                                                      |
| ["pigPIG-084_GL0114288 [gene] locus=scaffold145976_2:3:173:+ [Lack 5'-end] codon-table.11"]                                                                       |
| ["pigPIG-085_GL0149522 [gene] locus=scaffold101103_6:990:1346:+ [Lack 3'-end] codon-table.11"]                                                                    |
| ["pigPIG-087_GL0007883 [gene] locus=scaffold64475_2:325:717:- [Complete] codon-table.11"]                                                                         |
| ["pigPIG-089_GL0097410 [gene] locus=scaffold10150_1:3:641:- [Lack 3'-end] codon-table.11"]                                                                        |
| ["pigPIG-098_GL0154563 [gene] locus=scaffold87102_1:1:264:- [Lack 3'-end] codon-table.11"]                                                                        |
| ["pigPIG-102_GL0083633 [gene] locus=scaffold60087_1:466:786:- [Lack 5'-end] codon-table.11"]                                                                      |
| ["pigPIG-105_GL0069463 [gene] locus=scaffold22999_2:282:548:+ [Complete] codon-table.11"]                                                                         |
| ["pigPIG-106_GL0167568 [gene] locus=scaffold69983_1:2:253:- [Lack 3'-end] codon-table.11"]                                                                        |
| ["pigPIG-106_GL0188441 [gene] locus=scaffold67583_1:3:386:+ [Lack 5'-end] codon-table.11"]                                                                        |
| ["pigSYZ-388B_GL0022359 [gene] locus=scaffold25372_1:685:828:- [Lack 5'-end] codon-table.11"]                                                                     |
| ["pigSYZ-423B_GL0126391 [gene] locus=scaffold120838_3:1:411:+ [Lack 5'-end] codon-table.11"]                                                                      |
| ["pigSYZ-477B_GL0143256 [gene] locus=scaffold139826_2:3:356:- [Lack 3'-end] codon-table.11"]                                                                      |
| ["pigZXZ-8B_GL0060071 [gene] locus=scaffold198339_2:407:829:+ [Lack 3'-end] codon-table.11"]                                                                      |
| ["pigZXZ-8B_GL0212337 [gene] locus=scaffold26205_2:651:1016:+ [Lack 3'-end] codon-table.11"]                                                                      |
| ["rumen0081_GL0025168_1 [gene] locus=scaffold1981889_1:515:772:-[Lack 5'-end]"]                                                                                   |
| ["rumen0081_GL0068449_1 [gene] locus=scaffold22173_6:2:277:+[Lack 5'-end]"]                                                                                       |
| ["rumen0081_GL0492384_1 [gene] locus=scaffold57901_2:493:723:+[Lack 3'-end]"]                                                                                     |
| ["rumen0081_GL0526665_1 [gene] locus=scaffold446716_3:4533:4832:-[Lack 5'-end]"]                                                                                  |
| ["rumen0081_GL0555004_1 [gene] locus=scaffold908016_3:766:957:-[Lack 5'-end]",<br>"rumen100058_GL3309303_1 [gene] locus=scaffold3233303_1:2:193:+[Lack 5'-end]"]  |
| ["rumen0081_GL0596527_1 [gene] locus=scaffold1846311_1:2:364:+[Lack 5'-end]"]                                                                                     |
| ["rumen0081_GL0687396_1 [gene] locus=scaffold1598019_2:2:262:+[Lack 5'-end]"]                                                                                     |
| ["rumen0081_GL0816418_1 [gene] locus=scaffold68961_6:2:292:+[Lack 5'-end]"]                                                                                       |
| ["rumen0081_GL0822408_1 [gene] locus=scaffold860226_2:2:145:+[Lack 5'-end]"]                                                                                      |
| ["rumen0081_GL0913246_1 [gene] locus=scaffold1430310_1:1:243:-[Lack 3'-end]",<br>"rumen100058_GL0542887_1 [gene] locus=scaffold3134266_1:683:925:+[Lack 3'-end]"] |
| ["rumen0081_GL0929565_1 [gene] locus=scaffold526150_2:2:352:-[Lack 3'-end]"]                                                                                      |
| ["rumen0081_GL0929566_1 [gene] locus=scaffold526150_2:349:714:-[Lack 5'-end]",<br>"rumen3042_GL0034857_1 [gene] locus=scaffold2452405_4:239:604:-[Lack 5'-end]"]  |
| ["rumen0081_GL0943521_1 [gene] locus=scaffold804545_8:2:265:+[Lack 5'-end]"]                                                                                      |
| ["rumen0081_GL0960161_1 [gene] locus=C38002635_1:3:191:+[Lack 5'-end]"]                                                                                           |
| ["rumen0081_GL0977653_1 [gene] locus=scaffold1075911_4:971:1300:-[Lack 5'-end]"]                                                                                  |
| ["rumen0081_GL0978695_1 [gene] locus=scaffold951404_1:1011:1346:-[Lack 5'-end]"]                                                                                  |
| ["rumen0081_GL1050938_1 [gene] locus=scaffold2002823_1:3:341:-[Lack 3'-end]"]                                                                                     |
| ["rumen0081_GL1063997_1 [gene] locus=scaffold1650903_1:3:392:-[Lack 3'-end]"]                                                                                     |
| ["rumen0081_GL1156168_1 [gene] locus=scaffold1810593_2:2:160:+[Lack 5'-end]"]                                                                                     |
| ["rumen0081_GL1434169_1 [gene] locus=scaffold437330_3:1:273:+[Lack 5'-end]"]                                                                                      |
| ["rumen0081_GL1469283_1 [gene] locus=scaffold538318_4:3:404:-[Lack 3'-end]"]                                                                                      |
| ["rumen0081_GL1535099_1 [gene] locus=scaffold1995295_1:1:447:-[Lack 3'-end]"]                                                                                     |
| ["rumen0081_GL1563107_1 [gene] locus=scaffold1292164_1:593:871:+[Lack 3'-end]"]                                                                                   |
| ["rumen0081_GL1570278_1 [gene] locus=scaffold1723398_2:1:321:-[Lack 3'-end]"]                                                                                     |



|                                                                                                                                                                       |
|-----------------------------------------------------------------------------------------------------------------------------------------------------------------------|
| ["rumen0081_GL1674201_1 [gene] locus=scaffold65194_4:303:590:-[Lack 5'-end]"]                                                                                         |
| ["rumen0081_GL1763635_1 [gene] locus=scaffold1486654_1:177:515:+[Lack 3'-end]"]                                                                                       |
| ["rumen0081_GL1980800_1 [gene] locus=scaffold556784_3:3:179:+[Lack 5'-end]"]                                                                                          |
| ["rumen0081_GL1984450_1 [gene] locus=scaffold272372_1:462:740:-[Lack 5'-end]"]                                                                                        |
| ["rumen0081_GL1985915_1 [gene] locus=scaffold156778_2:563:991:+[Lack 3'-end]"]                                                                                        |
| ["rumen0081_GL2131252_1 [gene] locus=scaffold412998_6:2:406:+[Lack 5'-end]",<br>"rumen100058_GL1739690_1 [gene] locus=scaffold1196121_1:1:405:+[Lack 5'-end]"]        |
| ["rumen0081_GL2169682_1 [gene] locus=scaffold922929_1:227:559:-[Lack 5'-end]"]                                                                                        |
| ["rumen0081_GL2310984_1 [gene] locus=scaffold902722_1:3:287:-[Lack 3'-end]"]                                                                                          |
| ["rumen0081_GL2316711_1 [gene] locus=scaffold1177913_1:1:348:+[Lack 5'-end]"]                                                                                         |
| ["rumen0081_GL2352002_1 [gene] locus=scaffold1576824_2:1:435:+[Lack 5'-end]"]                                                                                         |
| ["rumen0081_GL2352340_1 [gene] locus=scaffold1973809_3:3220:3549:-[Lack 5'-end]"]                                                                                     |
| ["rumen0081_GL2530018_1 [gene] locus=scaffold845286_6:1022:1417:+[Lack 3'-end]"]                                                                                      |
| ["rumen0081_GL2555062_1 [gene] locus=scaffold181403_1:2:397:-[Lack 3'-end]"]                                                                                          |
| ["rumen100058_GL0022013_1 [gene] locus=scaffold3198607_2:646:1062:+[Lack 3'-end]"]                                                                                    |
| ["rumen100058_GL0079653_1 [gene] locus=scaffold2482952_1:1:273:+[Lack 5'-end]"]                                                                                       |
| ["rumen100058_GL0089784_1 [gene] locus=scaffold743560_1:2426:2731:-[Lack 5'-end]"]                                                                                    |
| ["rumen100058_GL0099082_1 [gene] locus=scaffold656461_5:249:587:-[Lack 5'-end]"]                                                                                      |
| ["rumen100058_GL0159734_1 [gene] locus=scaffold80811_4:1817:2188:+[Lack 3'-end]"]                                                                                     |
| ["rumen100058_GL0181973_1 [gene] locus=scaffold744079_1:3:323:-[Lack 3'-end]",<br>"rumen2009040_GL3528128_1 [gene] locus=scaffold1511778_1:1011:1331:+[Lack 3'-end]"] |
| ["rumen100058_GL0286299_1 [gene] locus=scaffold1165601_2:3:545:+[Lack both ends]"]                                                                                    |
| ["rumen100058_GL0322092_1 [gene] locus=scaffold1356170_1:1:312:+[Lack 5'-end]"]                                                                                       |
| ["rumen100058_GL0431768_1 [gene] locus=C60004488_1:805:1029:+[Lack 3'-end]"]                                                                                          |
| ["rumen100058_GL0531429_1 [gene] locus=scaffold1392407_4:1170:1460:+[Lack 3'-end]"]                                                                                   |
| ["rumen100058_GL0534021_1 [gene] locus=scaffold3171351_1:3:368:-[Lack 3'-end]"]                                                                                       |
| ["rumen100058_GL0586047_1 [gene] locus=scaffold2616239_2:3:365:-[Lack 3'-end]"]                                                                                       |
| ["rumen100058_GL0631258_1 [gene] locus=C59445710_1:374:790:-[Lack 5'-end]"]                                                                                           |
| ["rumen100058_GL0633342_1 [gene] locus=scaffold930924_1:1:255:-[Lack 3'-end]"]                                                                                        |
| ["rumen100058_GL0644812_1 [gene] locus=scaffold2605206_3:423:692:+[Lack 3'-end]"]                                                                                     |
| ["rumen100058_GL0677781_1 [gene] locus=scaffold1316226_5:2208:2555:+[Complete]"]                                                                                      |
| ["rumen100058_GL0734503_1 [gene] locus=scaffold51761_2:2:247:+[Lack 5'-end]"]                                                                                         |
| ["rumen100058_GL0752936_1 [gene] locus=scaffold1928015_3:2:304:+[Lack 5'-end]",<br>"rumen3042_GL1281026_1 [gene] locus=scaffold2375079_2:2:304:+[Lack 5'-end]"]       |
| ["rumen100058_GL0766909_1 [gene] locus=scaffold22185_3:2:214:+[Lack 5'-end]"]                                                                                         |
| ["rumen100058_GL0866875_1 [gene] locus=scaffold2432313_1:1:336:+[Lack 5'-end]"]                                                                                       |
| ["rumen100058_GL0956944_1 [gene] locus=scaffold3332839_1:1:198:+[Lack 5'-end]"]                                                                                       |
| ["rumen100058_GL1056175_1 [gene] locus=scaffold2252074_1:1:186:+[Lack 5'-end]",<br>"rumen3042_GL0211651_1 [gene] locus=scaffold2125478_2:361:546:-[Lack 5'-end]"]     |
| ["rumen100058_GL1186590_1 [gene] locus=scaffold2712369_3:3:377:-[Lack 3'-end]"]                                                                                       |
| ["rumen100058_GL1260280_1 [gene] locus=scaffold3242967_1:356:523:-[Lack 5'-end]"]                                                                                     |
| ["rumen100058_GL1277341_1 [gene] locus=scaffold3134266_4:1:240:+[Lack 5'-end]"]                                                                                       |
| ["rumen100058_GL1507542_1 [gene] locus=scaffold529438_4:894:1070:+[Lack 3'-end]"]                                                                                     |

|                                                                                                                                                                                                                                                          |
|----------------------------------------------------------------------------------------------------------------------------------------------------------------------------------------------------------------------------------------------------------|
| ["rumen100058_GL1521442_1 [gene] locus=scaffold1325861_2:2:202:+[Lack 5'-end]"]                                                                                                                                                                          |
| ["rumen100058_GL1532997_1 [gene] locus=scaffold1512339_1:297:545:-[Lack 5'-end]"]                                                                                                                                                                        |
| ["rumen100058_GL1546047_1 [gene] locus=scaffold2351752_4:876:1211:+[Lack 3'-end]"]                                                                                                                                                                       |
| ["rumen100058_GL1583839_1 [gene] locus=scaffold2751180_1:685:888:+[Lack 3'-end]"]                                                                                                                                                                        |
| ["rumen100058_GL1599682_1 [gene] locus=scaffold1900018_3:3:287:-[Lack 3'-end]"]                                                                                                                                                                          |
| ["rumen100058_GL1612120_1 [gene] locus=scaffold2154041_1:1:354:+[Lack 5'-end]"]                                                                                                                                                                          |
| ["rumen100058_GL1643378_1 [gene] locus=scaffold1233893_1:1:210:+[Lack 5'-end]",<br>"rumen100058_GL2885838_1 [gene] locus=scaffold2415619_1:1:210:+[Lack 5'-end]"]                                                                                        |
| ["rumen100058_GL1659862_1 [gene] locus=scaffold2136811_1:1:405:+[Lack 5'-end]",<br>"rumen2009040_GL0791826_1 [gene] locus=scaffold2466552_1:323:727:-[Lack 5'-end]",<br>"rumen2009040_GL2914999_1 [gene] locus=scaffold985728_2:279:683:-[Lack 5'-end]"] |
| ["rumen100058_GL1822836_1 [gene] locus=scaffold357672_3:160:537:+[Lack 3'-end]"]                                                                                                                                                                         |
| ["rumen100058_GL1901186_1 [gene] locus=scaffold2569265_1:1034:1315:+[Lack 3'-end]"]                                                                                                                                                                      |
| ["rumen100058_GL1964487_1 [gene] locus=scaffold3095996_1:1:219:-[Lack 3'-end]"]                                                                                                                                                                          |
| ["rumen100058_GL2029115_1 [gene] locus=scaffold1998067_1:2265:2435:-[Lack 5'-end]"]                                                                                                                                                                      |
| ["rumen100058_GL2036481_1 [gene] locus=scaffold940039_5:2802:3149:-[Lack 5'-end]"]                                                                                                                                                                       |
| ["rumen100058_GL2180073_1 [gene] locus=scaffold355308_4:138:506:-[Lack 5'-end]"]                                                                                                                                                                         |
| ["rumen100058_GL2222493_1 [gene] locus=scaffold1798464_1:576:890:+[Lack 3'-end]"]                                                                                                                                                                        |
| ["rumen100058_GL2260244_1 [gene] locus=scaffold466119_4:2838:3167:+[Lack 3'-end]"]                                                                                                                                                                       |
| ["rumen100058_GL2377314_1 [gene] locus=C58474256_1:368:601:-[Lack 5'-end]"]                                                                                                                                                                              |
| ["rumen100058_GL2821626_1 [gene] locus=scaffold148270_1:2:346:-[Lack 3'-end]"]                                                                                                                                                                           |
| ["rumen100058_GL2862569_1 [gene] locus=scaffold2358813_2:2:139:+[Lack 5'-end]"]                                                                                                                                                                          |
| ["rumen100058_GL2888023_1 [gene] locus=scaffold2352961_2:239:556:+[Lack 3'-end]"]                                                                                                                                                                        |
| ["rumen100058_GL2899304_1 [gene] locus=C59020242_1:373:687:+[Lack 3'-end]"]                                                                                                                                                                              |
| ["rumen100058_GL2959246_1 [gene] locus=scaffold1367024_1:3:380:-[Lack 3'-end]"]                                                                                                                                                                          |
| ["rumen100058_GL2995843_1 [gene] locus=scaffold3058537_1:2:532:-[Lack 3'-end]"]                                                                                                                                                                          |
| ["rumen100058_GL3043600_1 [gene] locus=scaffold2179793_1:1:360:+[Lack 5'-end]",<br>"rumen2009040_GL0831966_1 [gene] locus=scaffold251460_6:286:645:-[Lack 5'-end]"]                                                                                      |
| ["rumen100058_GL3091063_1 [gene] locus=scaffold8500_2:6213:6593:+[Lack 3'-end]"]                                                                                                                                                                         |
| ["rumen100058_GL3131347_1 [gene] locus=scaffold2092912_5:3:347:-[Lack 3'-end]"]                                                                                                                                                                          |
| ["rumen100058_GL3136593_1 [gene] locus=scaffold762324_1:1063:1398:-[Lack 5'-end]"]                                                                                                                                                                       |
| ["rumen100058_GL3179586_1 [gene] locus=scaffold1757812_3:2:319:+[Lack 5'-end]"]                                                                                                                                                                          |
| ["rumen100058_GL3403594_1 [gene] locus=scaffold3217913_1:3226:3615:+[Lack 3'-end]"]                                                                                                                                                                      |
| ["rumen100058_GL3461589_1 [gene] locus=scaffold2608196_1:3:326:-[Lack 3'-end]"]                                                                                                                                                                          |
| ["rumen100058_GL3582693_1 [gene] locus=scaffold2712369_1:3460:3768:-[Lack 5'-end]"]                                                                                                                                                                      |
| ["rumen100058_GL3616812_1 [gene] locus=scaffold3251965_1:1:366:+[Lack 5'-end]"]                                                                                                                                                                          |
| ["rumen100058_GL3622815_1 [gene] locus=scaffold1676918_1:2:574:-[Lack 3'-end]"]                                                                                                                                                                          |
| ["rumen100058_GL3735820_1 [gene] locus=scaffold2101219_2:272:643:+[Lack 3'-end]"]                                                                                                                                                                        |
| ["rumen100058_GL3736148_1 [gene] locus=scaffold2030091_1:425:664:-[Lack 5'-end]"]                                                                                                                                                                        |
| ["rumen2009040_GL0078744_1 [gene] locus=scaffold2896672_1:558:899:-[Lack 5'-end]",<br>"rumen3042_GL0849564_1 [gene] locus=scaffold811678_1:886:1227:-[Lack 5'-end]"]                                                                                     |
| ["rumen2009040_GL0091146_1 [gene] locus=scaffold2536092_2:145:534:-[Lack 5'-end]"]                                                                                                                                                                       |
| ["rumen2009040_GL0185634_1 [gene] locus=scaffold980264_1:645:959:-[Lack 5'-end]"]                                                                                                                                                                        |

|                                                                                                                                                                        |
|------------------------------------------------------------------------------------------------------------------------------------------------------------------------|
| ["rumen2009040_GL0192501_1 [gene] locus=scaffold1137677_3:1163:1528:-[Lack 5'-end]",<br>"rumen2009040_GL0883937_1 [gene] locus=scaffold951347_2:2:367:+[Lack 5'-end]"] |
| ["rumen2009040_GL0217692_1 [gene] locus=scaffold2799247_1:1:369:-[Lack 3'-end]",<br>"rumen2009040_GL1061855_1 [gene] locus=scaffold2664944_1:3:371:-[Lack 3'-end]"]    |
| ["rumen2009040_GL0240816_1 [gene] locus=scaffold993739_5:2:211:+[Lack 5'-end]"]                                                                                        |
| ["rumen2009040_GL0388547_1 [gene] locus=scaffold1851692_1:2:283:+[Lack 5'-end]"]                                                                                       |
| ["rumen2009040_GL0426471_1 [gene] locus=scaffold2986670_1:518:829:+[Lack 3'-end]",<br>"rumen2009040_GL2875767_1 [gene] locus=scaffold838611_1:3:314:-[Lack 3'-end]"]   |
| ["rumen2009040_GL0462510_1 [gene] locus=scaffold1959291_1:1:378:+[Lack 5'-end]",<br>"rumen2009040_GL3572450_1 [gene] locus=scaffold4938_2:1082:1459:-[Lack 5'-end]"]   |
| ["rumen2009040_GL0547865_1 [gene] locus=scaffold1675910_2:1:333:-[Lack 3'-end]"]                                                                                       |
| ["rumen2009040_GL0608834_1 [gene] locus=scaffold2637331_1:1:360:-[Lack 3'-end]"]                                                                                       |
| ["rumen2009040_GL0814568_1 [gene] locus=scaffold2576949_1:321:659:+[Lack 3'-end]"]                                                                                     |
| ["rumen2009040_GL0879318_1 [gene] locus=scaffold2762198_1:769:1149:+[Lack 3'-end]",<br>"rumen3042_GL0331167_1 [gene] locus=scaffold1631620_2:131:511:+[Lack 3'-end]"]  |
| ["rumen2009040_GL0939811_1 [gene] locus=scaffold568240_2:2:346:+[Lack 5'-end]"]                                                                                        |
| ["rumen2009040_GL0950215_1 [gene] locus=scaffold1949330_2:434:667:+[Lack 3'-end]"]                                                                                     |
| ["rumen2009040_GL0954223_1 [gene] locus=scaffold1387697_5:1:342:-[Lack 3'-end]"]                                                                                       |
| ["rumen2009040_GL0984223_1 [gene] locus=scaffold1625450_1:289:630:+[Lack 3'-end]"]                                                                                     |
| ["rumen2009040_GL0997165_1 [gene] locus=scaffold220049_1:1:348:+[Lack 5'-end]",<br>"rumen2009040_GL3427521_1 [gene] locus=scaffold133033_4:317:664:-[Lack 5'-end]"]    |
| ["rumen2009040_GL1033074_1 [gene] locus=scaffold702423_1:3:341:-[Lack 3'-end]"]                                                                                        |
| ["rumen2009040_GL1079553_1 [gene] locus=scaffold409690_4:223:504:+[Lack 3'-end]"]                                                                                      |
| ["rumen2009040_GL1109961_1 [gene] locus=scaffold2635216_5:525:893:-[Lack 5'-end]"]                                                                                     |
| ["rumen2009040_GL1260350_1 [gene] locus=scaffold142321_2:959:1072:-[Lack 5'-end]"]                                                                                     |
| ["rumen2009040_GL1294987_1 [gene] locus=scaffold2114311_2:273:542:-[Lack 5'-end]"]                                                                                     |
| ["rumen2009040_GL1327098_1 [gene] locus=scaffold2734079_1:1264:1644:-[Lack 5'-end]"]                                                                                   |
| ["rumen2009040_GL1374063_1 [gene] locus=scaffold839853_4:3:356:-[Lack 3'-end]"]                                                                                        |
| ["rumen2009040_GL1521253_1 [gene] locus=scaffold1250252_1:1:300:+[Lack 5'-end]"]                                                                                       |
| ["rumen2009040_GL1598708_1 [gene] locus=scaffold571617_1:2:307:-[Lack 3'-end]"]                                                                                        |
| ["rumen2009040_GL1679044_1 [gene] locus=scaffold1288072_1:523:870:-[Lack 5'-end]"]                                                                                     |
| ["rumen2009040_GL1718379_1 [gene] locus=scaffold204805_1:1:261:+[Lack 5'-end]"]                                                                                        |
| ["rumen2009040_GL1801902_1 [gene] locus=scaffold1839399_2:328:714:+[Lack 3'-end]"]                                                                                     |
| ["rumen2009040_GL1938061_1 [gene] locus=scaffold2528382_1:1:207:+[Lack 5'-end]"]                                                                                       |
| ["rumen2009040_GL1938873_1 [gene] locus=scaffold2716147_1:1:381:+[Lack 5'-end]"]                                                                                       |
| ["rumen2009040_GL1951308_1 [gene] locus=scaffold2801546_1:2:289:-[Lack 3'-end]"]                                                                                       |
| ["rumen2009040_GL2024789_1 [gene] locus=scaffold1742962_1:123:557:-[Lack 5'-end]"]                                                                                     |
| ["rumen2009040_GL2159959_1 [gene] locus=scaffold1441602_1:2:358:+[Lack 5'-end]"]                                                                                       |
| ["rumen2009040_GL2165755_1 [gene] locus=C53051945_1:305:541:-[Lack 5'-end]"]                                                                                           |
| ["rumen2009040_GL2200785_1 [gene] locus=scaffold2372755_1:354:566:-[Lack 5'-end]"]                                                                                     |
| ["rumen2009040_GL2286530_1 [gene] locus=scaffold1585469_1:377:790:+[Lack 3'-end]"]                                                                                     |
| ["rumen2009040_GL2381555_1 [gene] locus=scaffold1472774_1:1:285:+[Lack 5'-end]"]                                                                                       |
| ["rumen2009040_GL2400909_1 [gene] locus=scaffold27439_1:58:567:-[Lack 5'-end]"]                                                                                        |

|                                                                                    |
|------------------------------------------------------------------------------------|
| ["rumen2009040_GL2500842_1 [gene] locus=scaffold2535259_1:360:572:-[Lack 5'-end]"] |
| ["rumen2009040_GL2532651_1 [gene] locus=scaffold2404720_3:1:234:-[Lack 3'-end]"]   |
| ["rumen2009040_GL2535472_1 [gene] locus=scaffold1951967_1:295:558:-[Lack 5'-end]"] |
| ["rumen2009040_GL2566513_1 [gene] locus=scaffold2998878_1:3:419:-[Lack 3'-end]"]   |
| ["rumen2009040_GL2582273_1 [gene] locus=scaffold992072_5:3:191:+[Lack 5'-end]"]    |
| ["rumen2009040_GL2672523_1 [gene] locus=scaffold701553_2:2:451:-[Lack 3'-end]"]    |
| ["rumen2009040_GL2756463_1 [gene] locus=scaffold939657_2:135:503:+[Lack 3'-end]"]  |
| ["rumen2009040_GL2758646_1 [gene] locus=scaffold938630_2:3:353:+[Lack 5'-end]"]    |
| ["rumen2009040_GL2773498_1 [gene] locus=scaffold1931446_6:1:234:+[Lack 5'-end]"]   |
| ["rumen2009040_GL2847452_1 [gene] locus=scaffold441258_5:2:331:-[Lack 3'-end]"]    |
| ["rumen2009040_GL2875492_1 [gene] locus=scaffold238312_3:2:367:-[Lack 3'-end]"]    |
| ["rumen2009040_GL3055096_1 [gene] locus=scaffold1333588_2:393:728:+[Lack 3'-end]"] |
| ["rumen2009040_GL3082071_1 [gene] locus=scaffold2862968_2:1:390:+[Lack 5'-end]"]   |
| ["rumen2009040_GL3107942_1 [gene] locus=scaffold1798144_1:3:221:-[Lack 3'-end]"]   |
| ["rumen2009040_GL3155417_1 [gene] locus=scaffold1387697_3:410:706:-[Lack 5'-end]"] |
| ["rumen2009040_GL3269873_1 [gene] locus=scaffold1148194_5:126:503:+[Lack 3'-end]"] |
| ["rumen2009040_GL3276802_1 [gene] locus=scaffold448955_2:1:291:+[Lack 5'-end]"]    |
| ["rumen2009040_GL3326257_1 [gene] locus=scaffold2241552_1:144:581:+[Lack 3'-end]"] |
| ["rumen2009040_GL3500042_1 [gene] locus=scaffold132598_3:200:535:-[Complete]"]     |
| ["rumen2009040_GL3501092_1 [gene] locus=scaffold2196175_1:756:1154:-[Complete]"]   |
| ["rumen2009040_GL3528901_1 [gene] locus=scaffold223775_1:839:1186:+[Lack 3'-end]"] |
| ["rumen2009040_GL3531298_1 [gene] locus=scaffold2764935_1:2:391:-[Lack 3'-end]"]   |
| ["rumen2009040_GL3541435_1 [gene] locus=scaffold832351_2:2:370:-[Lack 3'-end]"]    |
| ["rumen2009040_GL3626590_1 [gene] locus=C53128917_1:355:549:-[Lack 5'-end]"]       |
| ["rumen2009040_GL3630757_1 [gene] locus=C53501220_1:1:312:+[Lack 5'-end]"]         |
| ["rumen3042_GL0059136_1 [gene] locus=scaffold695306_3:1587:1763:-[Lack 5'-end]"]   |
| ["rumen3042_GL0363961_1 [gene] locus=scaffold1314062_1:1:405:-[Lack 3'-end]"]      |
| ["rumen3042_GL0587160_1 [gene] locus=scaffold731980_1:1:492:+[Lack 5'-end]"]       |
| ["rumen3042_GL0822696_1 [gene] locus=scaffold1355477_3:1:390:+[Lack 5'-end]"]      |
| ["rumen3042_GL0833834_1 [gene] locus=scaffold2422269_1:1:363:+[Lack 5'-end]"]      |
| ["rumen3042_GL0846119_1 [gene] locus=scaffold1033519_1:3:260:-[Lack 3'-end]"]      |
| ["rumen3042_GL0860281_1 [gene] locus=scaffold804980_2:3:335:+[Lack 5'-end]"]       |
| ["rumen3042_GL0916107_1 [gene] locus=scaffold85108_1:6131:6484:+[Lack 3'-end]"]    |
| ["rumen3042_GL0946451_1 [gene] locus=scaffold1087221_6:1:282:-[Lack 3'-end]"]      |
| ["rumen3042_GL0955061_1 [gene] locus=scaffold2586303_1:3:455:-[Lack 3'-end]"]      |
| ["rumen3042_GL0981838_1 [gene] locus=scaffold1489189_1:2420:2575:-[Lack 5'-end]"]  |
| ["rumen3042_GL0994695_1 [gene] locus=scaffold2511542_1:1:372:+[Lack 5'-end]"]      |
| ["rumen3042_GL1081317_1 [gene] locus=scaffold63982_1:3:251:-[Lack 3'-end]"]        |
| ["rumen3042_GL1178291_1 [gene] locus=scaffold373936_3:208:525:+[Lack 3'-end]"]     |
| ["rumen3042_GL1208192_1 [gene] locus=scaffold10932_2:1:177:+[Lack 5'-end]"]        |
| ["rumen3042_GL1213106_1 [gene] locus=scaffold828639_5:1075:1281:-[Lack 5'-end]"]   |
| ["rumen3042_GL1361017_1 [gene] locus=scaffold1087221_4:293:802:-[Lack 5'-end]"]    |
| ["rumen3042_GL1469042_1 [gene] locus=scaffold1922261_1:1:471:+[Lack 5'-end]"]      |

|                                                                                                                                                                   |
|-------------------------------------------------------------------------------------------------------------------------------------------------------------------|
| ["rumen3042_GL1494266_1 [gene] locus=scaffold15366_1:4080:4355:-[Lack 5'-end]"]                                                                                   |
| ["rumen3042_GL1705099_1 [gene] locus=scaffold2401685_5:1:501:-[Lack 3'-end]"]                                                                                     |
| ["rumen3042_GL1761385_1 [gene] locus=scaffold1369872_1:815:958:-[Lack 5'-end]"]                                                                                   |
| ["rumen3042_GL1834328_1 [gene] locus=scaffold2313862_1:146:541:-[Lack 5'-end]"]                                                                                   |
| ["rumen3042_GL1943551_1 [gene] locus=scaffold589701_1:1:243:+[Lack 5'-end]"]                                                                                      |
| ["rumen3042_GL2029715_1 [gene] locus=scaffold1758679_2:1112:1279:-[Lack 5'-end]"]                                                                                 |
| ["rumen3042_GL2082551_1 [gene] locus=scaffold1268850_4:5265:5447:-[Lack 5'-end]"]                                                                                 |
| ["rumen3042_GL2090665_1 [gene] locus=scaffold1981975_1:656:916:+[Lack 3'-end]"]                                                                                   |
| ["rumen3042_GL2136591_1 [gene] locus=scaffold1561710_1:1:279:+[Lack 5'-end]"]                                                                                     |
| ["rumen3042_GL2147114_1 [gene] locus=scaffold586307_5:480:788:-[Lack 5'-end]"]                                                                                    |
| ["rumen3042_GL2177302_1 [gene] locus=scaffold98686_2:2:385:-[Lack 3'-end]"]                                                                                       |
| ["rumen3042_GL2281281_1 [gene] locus=scaffold157141_3:3:197:-[Lack 3'-end]"]                                                                                      |
| ["rumen3042_GL2333249_1 [gene] locus=scaffold2580510_1:378:686:+[Lack 3'-end]"]                                                                                   |
| ["rumen3042_GL2373089_1 [gene] locus=scaffold851029_1:1:201:+[Lack 5'-end]"]                                                                                      |
| ["rumen3042_GL2400089_1 [gene] locus=scaffold2401685_4:432:857:-[Lack 5'-end]"]                                                                                   |
| ["rumen3042_GL2613267_1 [gene] locus=scaffold1933295_1:3:242:-[Lack 3'-end]"]                                                                                     |
| ["rumen3042_GL2658947_1 [gene] locus=scaffold1076797_1:2:367:+[Lack 5'-end]"]                                                                                     |
| ["rumen552_GL0024812_1 [gene] locus=scaffold831033_1:3:341:+[Lack 5'-end]"]                                                                                       |
| ["rumen552_GL0063210_1 [gene] locus=scaffold759128_1:3:410:-[Lack 3'-end]"]                                                                                       |
| ["rumen552_GL0079101_1 [gene] locus=C21751169_1:569:781:+[Lack 3'-end]"]                                                                                          |
| ["rumen552_GL0205558_1 [gene] locus=scaffold394049_1:3:509:+[Lack both ends]"]                                                                                    |
| ["rumen552_GL0238773_1 [gene] locus=scaffold881856_1:1:180:+[Lack 5'-end]"]                                                                                       |
| ["rumen552_GL0242063_1 [gene] locus=scaffold470503_2:1073:1399:-[Lack 5'-end]",<br>"rumen2009040_GL2429135_1 [gene] locus=scaffold682176_2:1:327:+[Lack 5'-end]"] |
| ["rumen552_GL0376701_1 [gene] locus=scaffold370500_3:3:314:-[Lack 3'-end]"]                                                                                       |
| ["rumen552_GL0643184_1 [gene] locus=scaffold551232_2:1:264:+[Lack 5'-end]"]                                                                                       |
| ["rumen552_GL0749241_1 [gene] locus=scaffold713861_6:2:379:-[Lack 3'-end]"]                                                                                       |
| ["rumen552_GL0757863_1 [gene] locus=scaffold418765_1:1:231:+[Lack 5'-end]"]                                                                                       |
| ["rumen552_GL1230559_1 [gene] locus=scaffold873417_1:782:994:-[Lack 5'-end]",<br>"rumen100058_GL1267405_1 [gene] locus=scaffold73793_2:2:214:+[Lack 5'-end]"]     |
| ["rumen552_GL1343886_1 [gene] locus=scaffold209070_9:2:130:+[Lack 5'-end]"]                                                                                       |
| ["rumen552_GL1372244_1 [gene] locus=scaffold634987_3:265:663:-[Lack 5'-end]"]                                                                                     |
| ["rumen552_GL1470768_1 [gene] locus=scaffold255115_1:298:600:-[Lack 5'-end]"]                                                                                     |
| ["rumen552_GL1680869_1 [gene] locus=scaffold745815_2:627:782:-[Lack 5'-end]"]                                                                                     |
| ["rumen552_GL1709277_1 [gene] locus=C21710250_1:3:275:-[Lack 3'-end]"]                                                                                            |
| ["rumen552_GL1712898_1 [gene] locus=scaffold949811_2:2:340:-[Lack 3'-end]"]                                                                                       |
| ["rumen552_GL1748723_1 [gene] locus=C21253972_1:1:327:+[Lack 5'-end]"]                                                                                            |
| ["rumen553_GL0082586_1 [gene] locus=scaffold44886_4:1009:1368:+[Lack 3'-end]"]                                                                                    |
| ["rumen553_GL0098425_1 [gene] locus=scaffold319491_5:1:375:+[Lack 5'-end]"]                                                                                       |
| ["rumen553_GL0160224_1 [gene] locus=scaffold69956_2:2:346:+[Lack 5'-end]"]                                                                                        |
| ["rumen553_GL0202918_1 [gene] locus=scaffold274312_1:2:181:+[Lack 5'-end]"]                                                                                       |
| ["rumen553_GL0490408_1 [gene] locus=scaffold372603_4:266:604:+[Lack 3'-end]"]                                                                                     |
| ["rumen553_GL0543694_1 [gene] locus=scaffold194301_6:407:676:-[Lack 5'-end]"]                                                                                     |

|                                                                                                                                                                    |
|--------------------------------------------------------------------------------------------------------------------------------------------------------------------|
| ["rumen553_GL0553274_1 [gene] locus=C7637698_1:1574:1957:-[Lack 5'-end]"]                                                                                          |
| ["rumen553_GL0562574_1 [gene] locus=scaffold392100_1:3:185:+[Lack 5'-end]",<br>"rumen583_GL0702223_1 [gene] locus=scaffold303135_1:781:963:-[Lack 5'-end]"]        |
| ["rumen553_GL0665105_1 [gene] locus=scaffold46728_2:1479:1772:+[Complete]"]                                                                                        |
| ["rumen553_GL0678607_1 [gene] locus=scaffold145208_1:211:585:+[Lack 3'-end]"]                                                                                      |
| ["rumen553_GL0718529_1 [gene] locus=scaffold362985_2:3:404:+[Lack 5'-end]"]                                                                                        |
| ["rumen553_GL0865556_1 [gene] locus=scaffold13571_2:1:372:-[Lack 3'-end]"]                                                                                         |
| ["rumen553_GL0865807_1 [gene] locus=scaffold195522_3:2:337:+[Lack 5'-end]",<br>"rumen552_GL0376702_1 [gene] locus=scaffold370500_3:304:639:-[Lack 5'-end]"]        |
| ["rumen553_GL0895254_1 [gene] locus=scaffold100021_2:2:349:+[Lack 5'-end]"]                                                                                        |
| ["rumen554_GL0138870_1 [gene] locus=scaffold288892_1:2183:2407:-[Lack 5'-end]"]                                                                                    |
| ["rumen554_GL0188842_1 [gene] locus=scaffold1360733_1:1145:1423:+[Lack 3'-end]"]                                                                                   |
| ["rumen554_GL0365240_1 [gene] locus=scaffold1555248_1:1:246:+[Lack 5'-end]"]                                                                                       |
| ["rumen554_GL0394083_1 [gene] locus=scaffold2148067_1:692:922:-[Lack 5'-end]"]                                                                                     |
| ["rumen554_GL0397046_1 [gene] locus=scaffold679321_2:2:406:+[Lack 5'-end]",<br>"rumen3042_GL1821535_1 [gene] locus=scaffold1264780_4:3:407:+[Lack 5'-end]"]        |
| ["rumen554_GL0410305_1 [gene] locus=scaffold1434111_2:1:207:+[Lack 5'-end]"]                                                                                       |
| ["rumen554_GL0532025_1 [gene] locus=scaffold1503866_2:461:688:-[Lack 5'-end]"]                                                                                     |
| ["rumen554_GL0907277_1 [gene] locus=scaffold2042893_9:3:305:+[Lack 5'-end]"]                                                                                       |
| ["rumen554_GL1014034_1 [gene] locus=scaffold597931_10:1:285:+[Lack 5'-end]"]                                                                                       |
| ["rumen554_GL1019426_1 [gene] locus=scaffold135260_1:3196:3411:-[Lack 5'-end]"]                                                                                    |
| ["rumen554_GL1048462_1 [gene] locus=scaffold2076749_2:872:1165:+[Lack 3'-end]"]                                                                                    |
| ["rumen554_GL1231103_1 [gene] locus=C40248868_1:241:708:+[Lack 3'-end]"]                                                                                           |
| ["rumen554_GL1251878_1 [gene] locus=scaffold837034_2:2:190:+[Lack 5'-end]"]                                                                                        |
| ["rumen554_GL1269965_1 [gene] locus=scaffold1279791_1:254:637:+[Lack 3'-end]"]                                                                                     |
| ["rumen554_GL1400747_1 [gene] locus=scaffold357645_4:923:1123:-[Lack 5'-end]"]                                                                                     |
| ["rumen554_GL1410982_1 [gene] locus=scaffold861386_5:540:947:-[Lack 5'-end]",<br>"rumen2009040_GL2121181_1 [gene] locus=scaffold1829910_2:536:943:-[Lack 5'-end]"] |
| ["rumen554_GL1541304_1 [gene] locus=scaffold519696_3:3:323:+[Lack 5'-end]",<br>"rumen100058_GL1478275_1 [gene] locus=scaffold2792750_1:343:663:-[Lack 5'-end]"]    |
| ["rumen554_GL1657938_1 [gene] locus=scaffold1094179_2:369:686:+[Lack 3'-end]",<br>"rumen555_GL2048171_1 [gene] locus=C28722804_1:848:1165:+[Lack 3'-end]"]         |
| ["rumen554_GL1669413_1 [gene] locus=scaffold787818_3:3:290:+[Lack 5'-end]",<br>"rumen3042_GL1858140_1 [gene] locus=scaffold1990046_3:219:506:-[Lack 5'-end]"]      |
| ["rumen554_GL1748615_1 [gene] locus=scaffold462637_8:1:444:-[Lack 3'-end]"]                                                                                        |
| ["rumen554_GL1766862_1 [gene] locus=scaffold1837363_1:3:689:-[Lack 3'-end]"]                                                                                       |
| ["rumen554_GL1781225_1 [gene] locus=scaffold702412_4:1738:2037:+[Complete]",<br>"rumen0081_GL0759067_1 [gene] locus=scaffold314097_1:1:300:+[Lack 5'-end]"]        |
| ["rumen554_GL1795507_1 [gene] locus=scaffold1884241_1:175:522:+[Lack 3'-end]"]                                                                                     |
| ["rumen554_GL1877580_1 [gene] locus=scaffold319861_1:1:324:-[Lack 3'-end]"]                                                                                        |
| ["rumen554_GL1932074_1 [gene] locus=scaffold664346_1:634:1005:+[Lack 3'-end]"]                                                                                     |
| ["rumen554_GL2069886_1 [gene] locus=C39226807_1:3:389:-[Lack 3'-end]"]                                                                                             |
| ["rumen554_GL2146420_1 [gene] locus=scaffold1274607_1:411:626:-[Lack 5'-end]"]                                                                                     |

|                                                                                                                                                                 |
|-----------------------------------------------------------------------------------------------------------------------------------------------------------------|
| ["rumen554_GL2179928_1 [gene] locus=scaffold981268_6:3:494:-[Lack 3'-end]"]                                                                                     |
| ["rumen554_GL2185713_1 [gene] locus=scaffold1470618_3:2:151:+[Lack 5'-end]"]                                                                                    |
| ["rumen554_GL2277224_1 [gene] locus=scaffold1137894_1:3:356:+[Lack 5'-end]"]                                                                                    |
| ["rumen554_GL2377912_1 [gene] locus=scaffold1992475_3:539:730:-[Lack 5'-end]"]                                                                                  |
| ["rumen554_GL2593257_1 [gene] locus=scaffold140049_2:1499:1711:+[Lack 3'-end]"]                                                                                 |
| ["rumen554_GL2595288_1 [gene] locus=scaffold1257514_3:2:229:-[Lack 3'-end]"]                                                                                    |
| ["rumen554_GL2725600_1 [gene] locus=scaffold2014638_1:3:398:-[Lack 3'-end]",<br>"rumen2009040_GL0113933_1 [gene] locus=scaffold2685079_1:2:397:-[Lack 3'-end]"] |
| ["rumen554_GL2862624_1 [gene] locus=scaffold627097_5:590:901:+[Lack 3'-end]"]                                                                                   |
| ["rumen554_GL2884529_1 [gene] locus=scaffold1669682_1:2:232:+[Lack 5'-end]"]                                                                                    |
| ["rumen554_GL3088331_1 [gene] locus=C39804361_1:2:331:+[Lack 5'-end]"]                                                                                          |
| ["rumen554_GL3091637_1 [gene] locus=scaffold1981977_1:256:666:+[Lack 3'-end]"]                                                                                  |
| ["rumen554_GL3117223_1 [gene] locus=scaffold12496_2:1:405:+[Lack 5'-end]"]                                                                                      |
| ["rumen555_GL0027538_1 [gene] locus=scaffold131276_2:563:1003:+[Lack 3'-end]"]                                                                                  |
| ["rumen555_GL0068504_1 [gene] locus=scaffold1418384_2:3:326:+[Lack 5'-end]"]                                                                                    |
| ["rumen555_GL0072394_1 [gene] locus=C27352657_1:1:282:+[Lack 5'-end]"]                                                                                          |
| ["rumen555_GL0227348_1 [gene] locus=scaffold162383_2:332:655:+[Lack 3'-end]"]                                                                                   |
| ["rumen555_GL0268448_1 [gene] locus=scaffold1543841_1:325:678:-[Lack 5'-end]"]                                                                                  |
| ["rumen555_GL0377058_1 [gene] locus=scaffold1214444_2:2773:3108:+[Lack 3'-end]"]                                                                                |
| ["rumen555_GL0398033_1 [gene] locus=scaffold1360590_1:3:392:+[Lack 5'-end]"]                                                                                    |
| ["rumen555_GL0517934_1 [gene] locus=C27875116_1:3:314:+[Lack 5'-end]"]                                                                                          |
| ["rumen555_GL0633901_1 [gene] locus=scaffold1502535_1:3:317:+[Lack 5'-end]"]                                                                                    |
| ["rumen555_GL0651556_1 [gene] locus=scaffold308348_2:2:295:-[Lack 3'-end]"]                                                                                     |
| ["rumen555_GL0652635_1 [gene] locus=scaffold1347373_3:532:735:+[Lack 3'-end]"]                                                                                  |
| ["rumen555_GL0670004_1 [gene] locus=scaffold1324758_1:9029:9298:+[Lack 3'-end]"]                                                                                |
| ["rumen555_GL0922353_1 [gene] locus=scaffold666065_1:773:946:-[Lack 5'-end]"]                                                                                   |
| ["rumen555_GL0956666_1 [gene] locus=scaffold1091563_2:1897:2226:-[Lack 5'-end]"]                                                                                |
| ["rumen555_GL1184849_1 [gene] locus=scaffold1557299_2:2:274:+[Lack 5'-end]"]                                                                                    |
| ["rumen555_GL1224395_1 [gene] locus=scaffold193196_2:2:154:+[Lack 5'-end]"]                                                                                     |
| ["rumen555_GL1406086_1 [gene] locus=scaffold929941_1:3:311:-[Lack 3'-end]"]                                                                                     |
| ["rumen555_GL1858893_1 [gene] locus=C27598164_1:226:597:+[Lack 3'-end]"]                                                                                        |
| ["rumen555_GL1876032_1 [gene] locus=scaffold7414_1:1:306:+[Lack 5'-end]"]                                                                                       |
| ["rumen555_GL1992655_1 [gene] locus=C28343876_1:1:222:+[Lack 5'-end]"]                                                                                          |
| ["rumen555_GL1995028_1 [gene] locus=scaffold312725_1:111:524:-[Lack 5'-end]"]                                                                                   |
| ["rumen555_GL2118963_1 [gene] locus=scaffold329944_2:277:627:+[Lack 3'-end]"]                                                                                   |
| ["rumen555_GL2180460_1 [gene] locus=scaffold1526821_1:1:393:+[Lack 5'-end]"]                                                                                    |
| ["rumen555_GL2452583_1 [gene] locus=scaffold851016_2:339:710:+[Lack 3'-end]"]                                                                                   |
| ["rumen555_GL2480943_1 [gene] locus=scaffold1347711_1:1117:1287:-[Lack 5'-end]"]                                                                                |
| ["rumen555_GL2509487_1 [gene] locus=scaffold1350860_1:3:359:+[Lack 5'-end]"]                                                                                    |
| ["rumen583_GL0053729_1 [gene] locus=C5168210_1:2:244:+[Lack 5'-end]"]                                                                                           |
| ["rumen583_GL0053730_1 [gene] locus=C5168210_1:373:603:-[Lack 3'-end]",<br>"rumen2009040_GL0943771_1 [gene] locus=scaffold401680_1:3:233:-[Lack 3'-end]"]       |
| ["rumen583_GL0213114_1 [gene] locus=scaffold42773_5:3:260:-[Lack 3'-end]"]                                                                                      |

|                                                                                                                                                             |
|-------------------------------------------------------------------------------------------------------------------------------------------------------------|
| ["rumen583_GL0215888_1 [gene] locus=scaffold100224_5:1:312:+[Lack 5'-end]","<br>"rumen0081_GL0689776_1 [gene] locus=scaffold335362_4:1:312:+[Lack 5'-end]"] |
| ["rumen583_GL0228964_1 [gene] locus=scaffold155921_1:148:429:+[Complete]"]                                                                                  |
| ["rumen583_GL0244099_1 [gene] locus=scaffold26514_7:2:343:-[Lack 3'-end]"]                                                                                  |
| ["rumen583_GL0346722_1 [gene] locus=scaffold212105_4:557:715:-[Lack 5'-end]"]                                                                               |
| ["rumen583_GL0393253_1 [gene] locus=scaffold92131_1:1:411:-[Lack 3'-end]"]                                                                                  |
| ["rumen583_GL0455644_1 [gene] locus=scaffold143659_1:1:345:+[Lack 5'-end]"]                                                                                 |
| ["rumen583_GL0551175_1 [gene] locus=scaffold225563_1:1055:1315:-[Lack 5'-end]"]                                                                             |
| ["rumen583_GL0594447_1 [gene] locus=scaffold139170_2:3:140:+[Lack 5'-end]"]                                                                                 |
| ["rumen583_GL0645943_1 [gene] locus=C5419234_1:1:141:+[Lack 5'-end]"]                                                                                       |
| ["rumen7049_GL0001475_1 [gene] locus=C52796474_1:596:940:-[Lack 5'-end]"]                                                                                   |
| ["rumen7049_GL0049077_1 [gene] locus=scaffold1146656_3:2:427:+[Lack 5'-end]"]                                                                               |
| ["rumen7049_GL0216554_1 [gene] locus=scaffold799511_1:663:833:+[Lack 3'-end]"]                                                                              |
| ["rumen7049_GL0220356_1 [gene] locus=scaffold2216306_1:426:692:-[Lack 5'-end]"]                                                                             |
| ["rumen7049_GL0493365_1 [gene] locus=scaffold848548_1:676:1020:+[Lack 3'-end]"]                                                                             |
| ["rumen7049_GL0534985_1 [gene] locus=scaffold1763776_1:3:347:+[Lack 5'-end]"]                                                                               |
| ["rumen7049_GL0857407_1 [gene] locus=scaffold1178704_1:482:790:-[Lack 5'-end]"]                                                                             |
| ["rumen7049_GL0888049_1 [gene] locus=scaffold867490_1:739:1062:-[Lack 5'-end]"]                                                                             |
| ["rumen7049_GL0989810_1 [gene] locus=scaffold970554_2:355:684:-[Lack 5'-end]"]                                                                              |
| ["rumen7049_GL1059735_1 [gene] locus=scaffold629855_5:3:305:+[Lack 5'-end]"]                                                                                |
| ["rumen7049_GL1283114_1 [gene] locus=scaffold1642442_1:421:618:-[Lack 5'-end]"]                                                                             |
| ["rumen7049_GL1314016_1 [gene] locus=scaffold1326008_1:175:507:+[Lack 3'-end]"]                                                                             |
| ["rumen7049_GL1367561_1 [gene] locus=scaffold2187250_1:3:527:-[Lack 3'-end]"]                                                                               |
| ["rumen7049_GL1409444_1 [gene] locus=scaffold844916_3:335:832:+[Lack 3'-end]"]                                                                              |
| ["rumen7049_GL1438087_1 [gene] locus=scaffold602757_1:3:326:-[Lack 3'-end]"]                                                                                |
| ["rumen7049_GL1458110_1 [gene] locus=scaffold532368_3:912:1145:-[Lack 5'-end]"]                                                                             |
| ["rumen7049_GL1544548_1 [gene] locus=C52778990_1:535:930:+[Lack 3'-end]"]                                                                                   |
| ["rumen7049_GL1676226_1 [gene] locus=scaffold942407_1:2:316:-[Lack 3'-end]"]                                                                                |
| ["rumen7049_GL1899950_1 [gene] locus=scaffold1940712_1:389:604:-[Lack 5'-end]"]                                                                             |
| ["rumen7049_GL1961835_1 [gene] locus=scaffold1357629_3:2:331:-[Lack 3'-end]"]                                                                               |
| ["rumen7049_GL2118273_1 [gene] locus=scaffold1193657_2:1395:1556:+[Lack 3'-end]"]                                                                           |
| ["rumen7049_GL2276028_1 [gene] locus=scaffold185098_2:2033:2350:-[Lack 5'-end]"]                                                                            |
| ["rumen7049_GL2637773_1 [gene] locus=scaffold1432033_1:598:951:+[Lack 3'-end]"]                                                                             |
| ["rumen7049_GL2701731_1 [gene] locus=C52742654_1:788:910:-[Lack 5'-end]"]                                                                                   |
| ["rumen7049_GL2729833_1 [gene] locus=C51342306_1:1:225:+[Lack 5'-end]"]                                                                                     |
| ["rumen7049_GL2874857_1 [gene] locus=scaffold2079380_1:950:1180:-[Lack 5'-end]"]                                                                            |



**Table S2**

List of the multi-modular sequences containing a GH130 module, and their location in the meta-nodes.

| Sequence ID       | Modularity                    | SSN Cluster                     |
|-------------------|-------------------------------|---------------------------------|
| CAZy DB           |                               |                                 |
| ACY49488.1        | GH130-GH130                   | small meta-node (<20 sequences) |
| AEN74517.1        | GH130-GH130                   | small meta-node (<20 sequences) |
| AKM78124.1        | GH130-GH130                   | small meta-node (<20 sequences) |
| AKM83974.1        | GH130-GH130                   | small meta-node (<20 sequences) |
| CCP27154.1        | GH130-GT81                    | small meta-node (<20 sequences) |
| AEE92278.1        | GH130-GT81                    | small meta-node (<20 sequences) |
| Human metagenome  |                               |                                 |
| DOM025_GL0036051  | GH130-GH92                    | Singletons                      |
| MH0378_GL0079806  | GH92-GH130                    | C3                              |
| MH0369_GL0053907  | GH127-GH130_distantly related | small meta-node (<20 sequences) |
| Rumen metagenome  |                               |                                 |
| 0081_GL1521727    | GH130-GH78                    | C3                              |
| 3042_GL0231557    | GH130-GH78                    | C3                              |
| 0081_GL0217456    | GH130-GH78                    | C3                              |
| 7049_GL1068002    | GH2-GH130                     | C3                              |
| 554_GL2279888     | GH92-GH130                    | C3                              |
| 7049_GL1012174    | GH92-GH130                    | C3                              |
| 2009040_GL1278742 | GH43-GH130                    | C3                              |
| 555_GL0472243     | GH130_dist-GH142              | UC4                             |
| 555_GL1429890     | GH130_dist-GH142              | UC4                             |
| 0081_GL0027620    | GH130_dist-GH142              | UC4                             |
| 0081_GL1803283    | GH130_dist-GH142              | UC4                             |
| 2009040_GL1002494 | GH130_dist-GH142              | UC4                             |
| 7049_GL0472254    | GH130_dist-GH142              | UC4                             |
| 7049_GL0484382    | GH130_dist-GH142              | UC4                             |
| 552_GL1270477     | GH130_dist-GH142              | UC4                             |
| 554_GL0058843     | GH130_dist-GH142              | UC4                             |

**Table S3**

Characteristics of the sequences chosen for biochemical characterization.

| Meta-node | Sequence ID        | Prevalence in the human gut metagenome (% of individuals) | Best Blast hit with a GH130 sequence from the CAZy DB |            | Best Blast hit with a characterized GH130 |            | Activity                                                                         |
|-----------|--------------------|-----------------------------------------------------------|-------------------------------------------------------|------------|-------------------------------------------|------------|----------------------------------------------------------------------------------|
|           |                    |                                                           | Query coverage                                        | % Identity | Query coverage                            | % Identity |                                                                                  |
| UC1       | MH0431_GL0150624   | 17 %                                                      | AVM43672.1                                            |            | AAO76140.1                                |            | β-1,4-mannosyl-glucuronic acid phosphorylase                                     |
|           |                    |                                                           | 95%                                                   | 59.8%      | 94%                                       | 33.1%      |                                                                                  |
| UC3       | MH0373_GL0093988   | 17 %                                                      | APF19181.1                                            |            | WP_026485574.1                            |            | β-1,4-mannooligosaccharide phosphorylase                                         |
|           |                    |                                                           | 95%                                                   | 43.4%      | 97%                                       | 39.3%      |                                                                                  |
| UC4       | MH0011_GL0029022   | 53 %                                                      | AMM53793.1                                            |            | ACT94389.1                                |            | /                                                                                |
|           |                    |                                                           | 69%                                                   | 31.1%      | 57%                                       | 30.0%      |                                                                                  |
| UC6       | MH0409_GL0096961   | 4 %                                                       | ADO84614.1                                            |            | VCV21229.1                                |            | /                                                                                |
|           |                    |                                                           | 98%                                                   | 36.6%      | 98%                                       | 36.6%      |                                                                                  |
| UC7       | 340101.Vvad_PD3074 | 12 %                                                      | AIQ48603.1                                            |            | CAZ94304.1                                |            | β-1,3-mannosyl-glucose phosphorylase<br>β-1,3-mannooligosaccharide phosphorylase |

**Table S4**

Distribution of the predicted phosphorylases and hydrolases in the meta-nodes. The number of sequences includes full-length and truncated sequences.

| SSN meta-nodes      | C1   | C2   | C4  | C5  | C6 | UC1 | UC2 | UC3 | UC5 | UC6 | UC7 | UC8 | UC9 | Total | C3  | UC4 | Total |
|---------------------|------|------|-----|-----|----|-----|-----|-----|-----|-----|-----|-----|-----|-------|-----|-----|-------|
| Predicted mechanism | GP   | GP   | GP  | GP  | GP | GP  | GP  | GP  | GP  | GP  | GP  | GP  | GP  | GP    | GH  | GH  | GH    |
| <b>CAZy</b>         | 222  | 269  | 290 | 42  | 85 | 31  | 199 | 135 | 61  | 0   | 9   | 26  | 29  | 1398  | 113 | 0   | 113   |
| <b>Human mg</b>     | 347  | 332  | 53  | 51  | 2  | 31  | 0   | 24  | 0   | 20  | 6   | 8   | 0   | 874   | 113 | 31  | 144   |
| <b>Mouse mg</b>     | 149  | 227  | 18  | 5   | 0  | 1   | 0   | 0   | 0   | 0   | 1   | 2   | 0   | 403   | 26  | 2   | 28    |
| <b>Pig mg</b>       | 235  | 244  | 13  | 13  | 0  | 24  | 0   | 3   | 0   | 1   | 4   | 0   | 0   | 537   | 39  | 5   | 44    |
| <b>Bovine mg</b>    | 970  | 643  | 19  | 61  | 0  | 118 | 0   | 7   | 0   | 11  | 13  | 0   | 0   | 1842  | 78  | 53  | 131   |
| <b>Total</b>        | 1923 | 1715 | 393 | 172 | 87 | 205 | 199 | 169 | 61  | 32  | 33  | 36  | 29  | 5054  | 369 | 91  | 460   |
